# Supplementary material
Source: publisher site journal article supplement (https://www.dovepress.com/article/276033)
Supplement: Supplementary file 1 [file get_supplementary_file.php]

Supporting Information

**99mTc-radiolabeled silica nanocarriers for targeted detection and treatment of HER2-positive breast cancer**

*Paolo Rainone,‡,§,ǂAntonella De Palma,* Francesco Sudati,# Valentina Roffia,* Valentina Rigamonti,¶ Lucia Salvioni,¶ Miriam Colombo,¶ Marilena Ripamonti,§ Antonello Enrico Spinelli,† Davide Mazza,† Pierluigi Mauri,* Rosa Maria Moresco,‡,§,† Davide Prosperi,¶ and Sara Belloli§,†*

‡ Department of Medicine and Surgery, University of Milano-Bicocca, Via Cadore 48, 20900 Monza, Italy;

§ Institute of Molecular Bioimaging and Physiology of CNR, Via Fratelli Cervi 93, 20090 Segrate;

ǂ Doctorate School of Molecular and Translational Medicine, University of Milan, Milan, Italy;

* Institute of Biomedical Technologies of CNR, Via Fratelli Cervi 93, 20090 Segrate;

# PET and Nuclear Medicine Unit, San Raffaele Scientific Institute, Via Olgettina 60, 20132 Milano, Italy;

¶ NanoBioLab, Dipartimento di Biotecnologie e Bioscienze, Università di Milano-Bicocca, Piazza della Scienza 2, 20126 Milano, Italy;

† Experimental Imaging Center, San Raffaele Scientific Institute, Via Olgettina 60, 20132, Milano, Italy.

Corresponding Author: Sara Belloli, Institute of Molecular Bioimaging and Physiology of CNR, Via Fratelli Cervi 93, 20090 Segrate, Italy; Phone: +39 02 26433640, Fax: +39 0226432717, Email: [belloli.sara@hsr.it](mailto:belloli.sara@hsr.it)

***Nanoparticles synthesis and characterization***

**Chemicals**

All reagents and solvents were purchased from Sigma-Aldrich (St Louis, MO, USA), Rapp Polymere (Tuebingen, Germany), Riedel-de Haën (Seelze, Germany), Thermo fisher scientific (Waltham, Massachusetts, USA) and Fluka (St Gallen, Germany) and used as received without further purification. TZ antibody was purchased by Genentech (Herceptin®; Genentech, South San Francisco, CA, USA) and used after dialysis in phosphate-buffered saline (PBS) at 4°C on a Slyde-A-Lyzer dialysis cassette (Waltham, MA, USA) with a 7 kDa cutoff.

**Synthesis of FITC loaded silica nanospheres**

Monodisperse fluorescent silica nanospheres were obtained by Stöber synthesis. Briefly, an aqueous solution of NH4OH (1.827 g, 0.58 M), was diluted to 50 mL with dry ethanol and tetraethyl orthosilicate (TEOS) (1.990 mL, 0.17 M) freshly prepared (3-Aminopropyl)-trimethoxysilane (APTMS)-FITC complex were rapidly added under magnetic stirring.[1](#_ENREF_1) After 20 h at RT in the darkness, the solvent was evaporated under reduced pressure and the obtained nanoparticles resuspended in deionized water. For the shell synthesis, L-arginine (0.5 mg/mL) was added and, after 10 min at 70°C, a solution of TEOS (765 µL) was slowly added dropwise and the reaction was left under mild stirring at 70°C overnight in the darkness. The resulting fluorescent SiNPs were centrifugated thrice (20,000 rcf, 20 min) and resuspended in deionized water.

**Synthesis of SiNPs-TZ (1:2 and 1:8, SiNPs to Hc-TZ ratio)**

Glacial acetic acid (5.25 µmol/mg of NPs) and APTMS (1.72 µmol/mg of NPs) were added in sequence to 150 mg of FITC loaded silica nanospheres. After 2h incubation at RT, the aminated NPs were were centrifugated 4 times (20,000 rcf, 20 min) and resuspended in Hepes buffer (20 mM, pH 9). Next, the amine functionalities were quantified by ninhydrin assay and Methyl-PEG-NHS-Ester (MS(PEG)4) was added in equimolar amount.[2](#_ENREF_2) After 2h incubation at RT and 4 washings (20,000 rcf, 20 min), 5 molar excess of NHS-PEG-Maleimide (SM(PEG)8) was added to the unreacted amines assessed with ninhydrin assay. 2h later, the reagent excess removed by centrifugation (20,000 rcf, 20 min; 4 times) and the nanoparticles suspended in Hepes 20 mM pH 7.4. Afterwards, Hc-TZ coupling was achieved by TZ reduction with cysteamine, purification and addition to the NPs suspension. SiNPs-TZ(1:8 SiNPs to Hc-TZ ratio) and SiNPs-TZ(1:2 SiNPs to Hc-TZ ratio) were obtained by adding 10 µg and 2.5 µg of protein per mg of NPs respectively. After the reaction (2h at RT), the product was washed once (16,000 rcf, 20 min, 4°C) and the unconjugated maleimide groups were completely saturated by the addition of Methyl-PEG-Thiol (MT(PEG)4; 0.5 µg/mg of NPs). 1h later, the NPs were washed thrice (16,000 rcf, 20 min, 4°C) and suspended in saline solution.

**Synthesis of Doxorubicin loaded silica nanospheres**

Doxorubicin loaded silica nanospheres were obtained by Stöber synthesis followed by drug conjugation. The core synthesis was performed as described above for fluorescent silica nanospheres avoiding the use of APTMS-FITC complex, while the shell was synthetized by incubating the cores overnight with freshly prepared isocyanatopropyl trimethoxysilane (IPTES)-Doxorubicin complex in Na2HPO4 0.2 M at pH 9.[3](#_ENREF_3) After the reaction and purification, the drug conjugation was assessed by UV-spectroscopy analysis.

**Synthesis of DOX-SiNPs and DOX-SiNPs-TZ**

DOX-SiNPs-TZ were obtained as described for SiNPs-TZ (1:8, SiNPs to Hc-TZ ratio) using as starting nanoparticles doxorubicin loaded nanoparticles. DOX-SiNPs were synthetized by avoiding the TZ-coupling step.

DOX loading and entrapment efficiency were calculated after UV-Vis analysis of the final preparation exploiting the absorption properties of the drug (λ = 481 nm) by means of a calibration curve previously set up. Calculations were conducted using the following equations:

Drug loading efficiency (DLE) = x 100

Drug entrapment efficiency (DEE) = x 100

Consistently with the data previously reported,[3](#_ENREF_3) for both preparations DOX loading was around 1.5-1.6% with an encapsulation efficiency ~ 40%.

**Nanoparticles characterization**

Dynamic Light Scattering (DLS) measurements were performed with Zetasizer Nano ZS ZEN3600 (Malvern Instruments Ltd, Worcestershire, UK) operating at a light source wavelength of 633 nm and a fixed scattering angle of 173°. The hydrodynamic diameter was obtained by the number size distribution (material RI=1.54) and the results were expressed as mean ± standard deviation of 3 independent measurements.

Transmission Electron Microscopy (TEM) images were obtained using FEI 120 KV Tecnai G2 spirit Bio TWIN Instrument. The sample was deposited onto a formvar-coated 200-mesh copper grid (Ted Pella, CA, USA) allowed to dry before examination.

Dot blot analysis was performed to assess the hc-TZ conjugation. Briefly, SiNPs-TZ (1:8 Hc-Tz) and SiNPs-TZ (1:2 Hc-Tz) were fixed on nylon membrane with Bio-Dot Microfiltration Apparatus (Bio-Rad, Hercules, CA, USA). Different amount of TZ (37.5, 75, 150 μg) and SiNPs were used as positive and negative controls respectively. Afterwards, the membrane was blocked 1 h at RT with PBS-2%BSA, then incubated for 1 h with 1: 20,000 diluted HRP-conjugated rabbit antihuman IgG polyclonal Ab (GeneTex inc., Irvine, CA, USA) in PBS-2%BSA. The membrane was washed 3 times with PBS Tween 20 (0.5%) and the TZ was detected after the addition of enhanced chemiluminescence reagents (Westar Nova 2011; Cyanagen, Bologna, Italy) by Image Studio imaging system (Li-Cor, Lincoln, NE, USA).

**Table S1:** DLS analysis of SiNPs-TZ (1:2 Hc-Tz) and SiNPs-TZ (1:8 Hc-Tz). Data represent mean ± standard deviation (*n* = 3).

| **Nanoconjugate** | **Hydrodynamic diameter (nm)** | **PDI** |
| --- | --- | --- |
| SiNPs-TZ (1:2 Hc-Tz) | 72.9 ± 2.95 | 0.093 ± 0.007 |
| SiNPs-TZ (1:8 Hc-Tz) | 76.97 ± 4.97 | 0.114 ± 0.020 |

**Abbreviations:**  PDI, polydispersity index

**Table S2:** DLS analysis of DOX-SiNPs-TZ and DOX-SiNPs-TZ (1:8 Hc-Tz). Data represent mean ± standard deviation (*n* = 3).

| **Nanoconjugate** | **Hydrodynamic diameter (nm)** | **PDI** |
| --- | --- | --- |
| DOX-SiNPs | 69.9 ± 6.23 | 0.165 ± 0.004 |
| DOX-SiNPs-TZ (1:8 Hc-TZ) | 83.4 ± 17.3 | 0.384 ± 0.009 |

**Abbreviations:**  PDI, polydispersity index


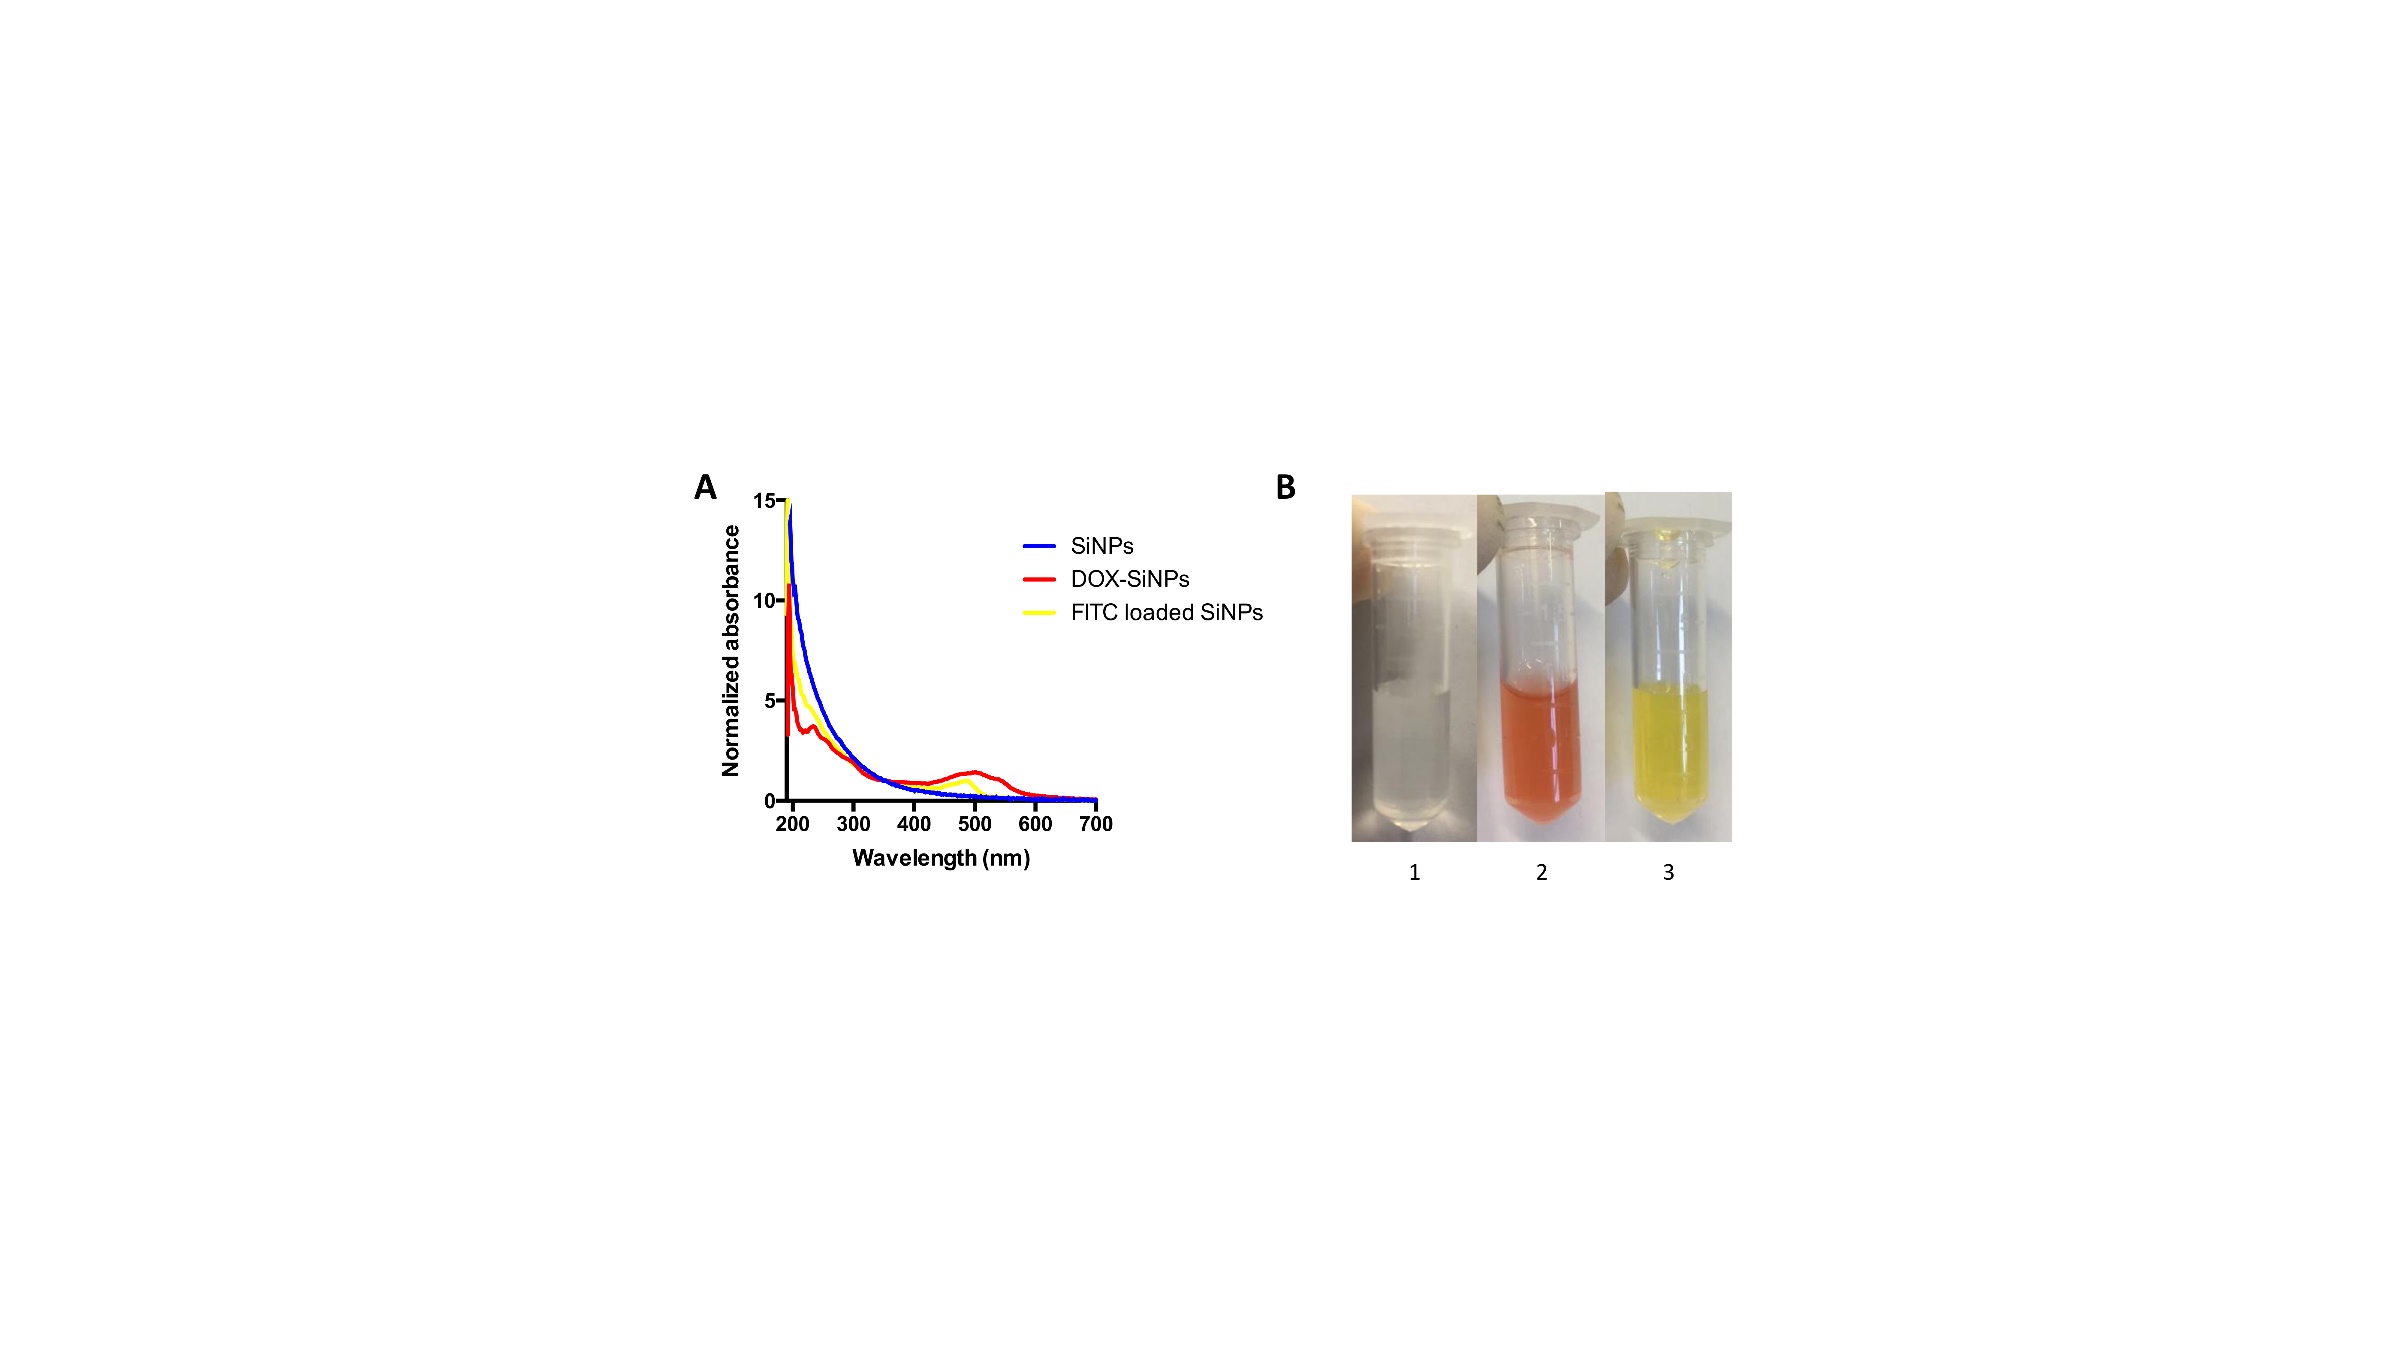


**Figure S1.** A) Spectra of SiNPs, DOX-SiNPs and FITC loaded SiNPs recorded by UV-Vis spectroscopy. The distinctive absorbance peak of the DOX and FITC were clearly detectable (maximum at 500 and 488 nm respectively). B) Pictures of nanoparticles batches representing 1) SiNPs 2) DOX-SiNPs and 3) FITC loaded SiNPs.


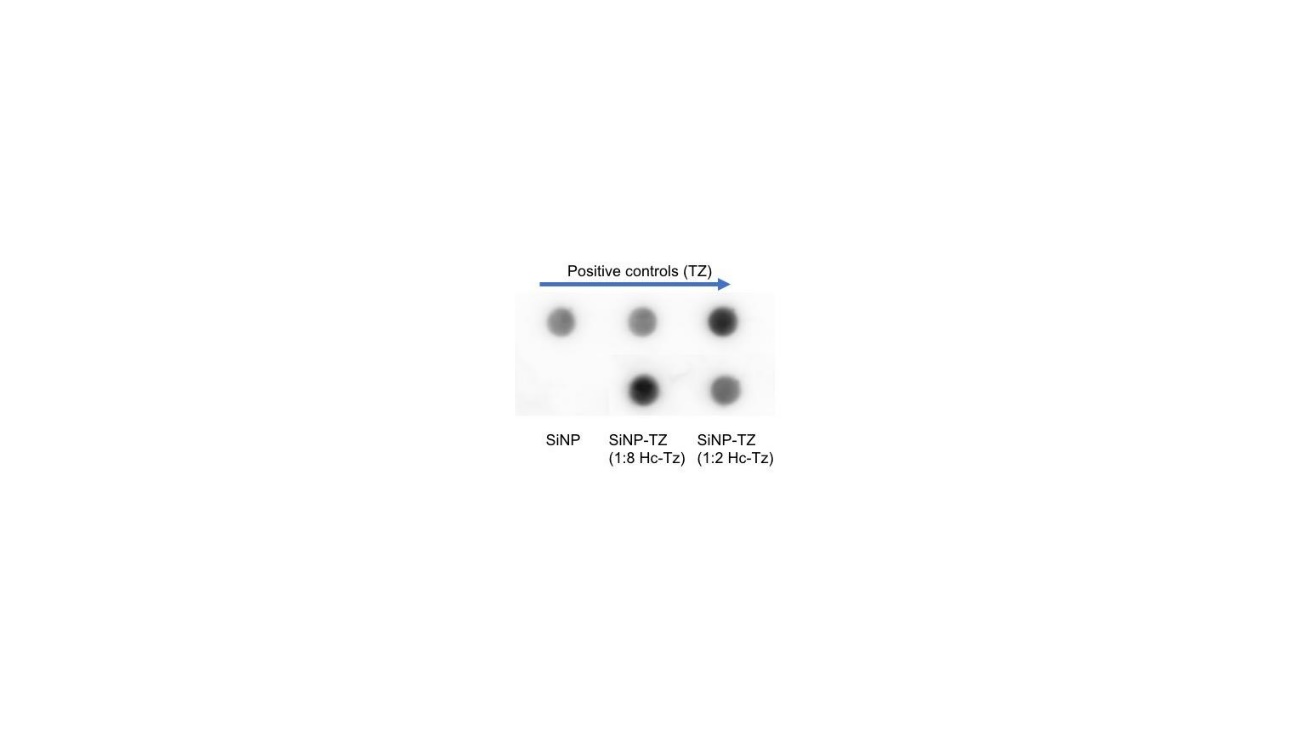


**Figure S2.** Dot Blot analysis performed on SiNPs and SiNPs-TZ (1:8 Hc-Tz) and SiNPs-TZ (1:2 Hc-Tz), using increasing amounts of Tz (37.5, 75, 150 ug) as positive controls.


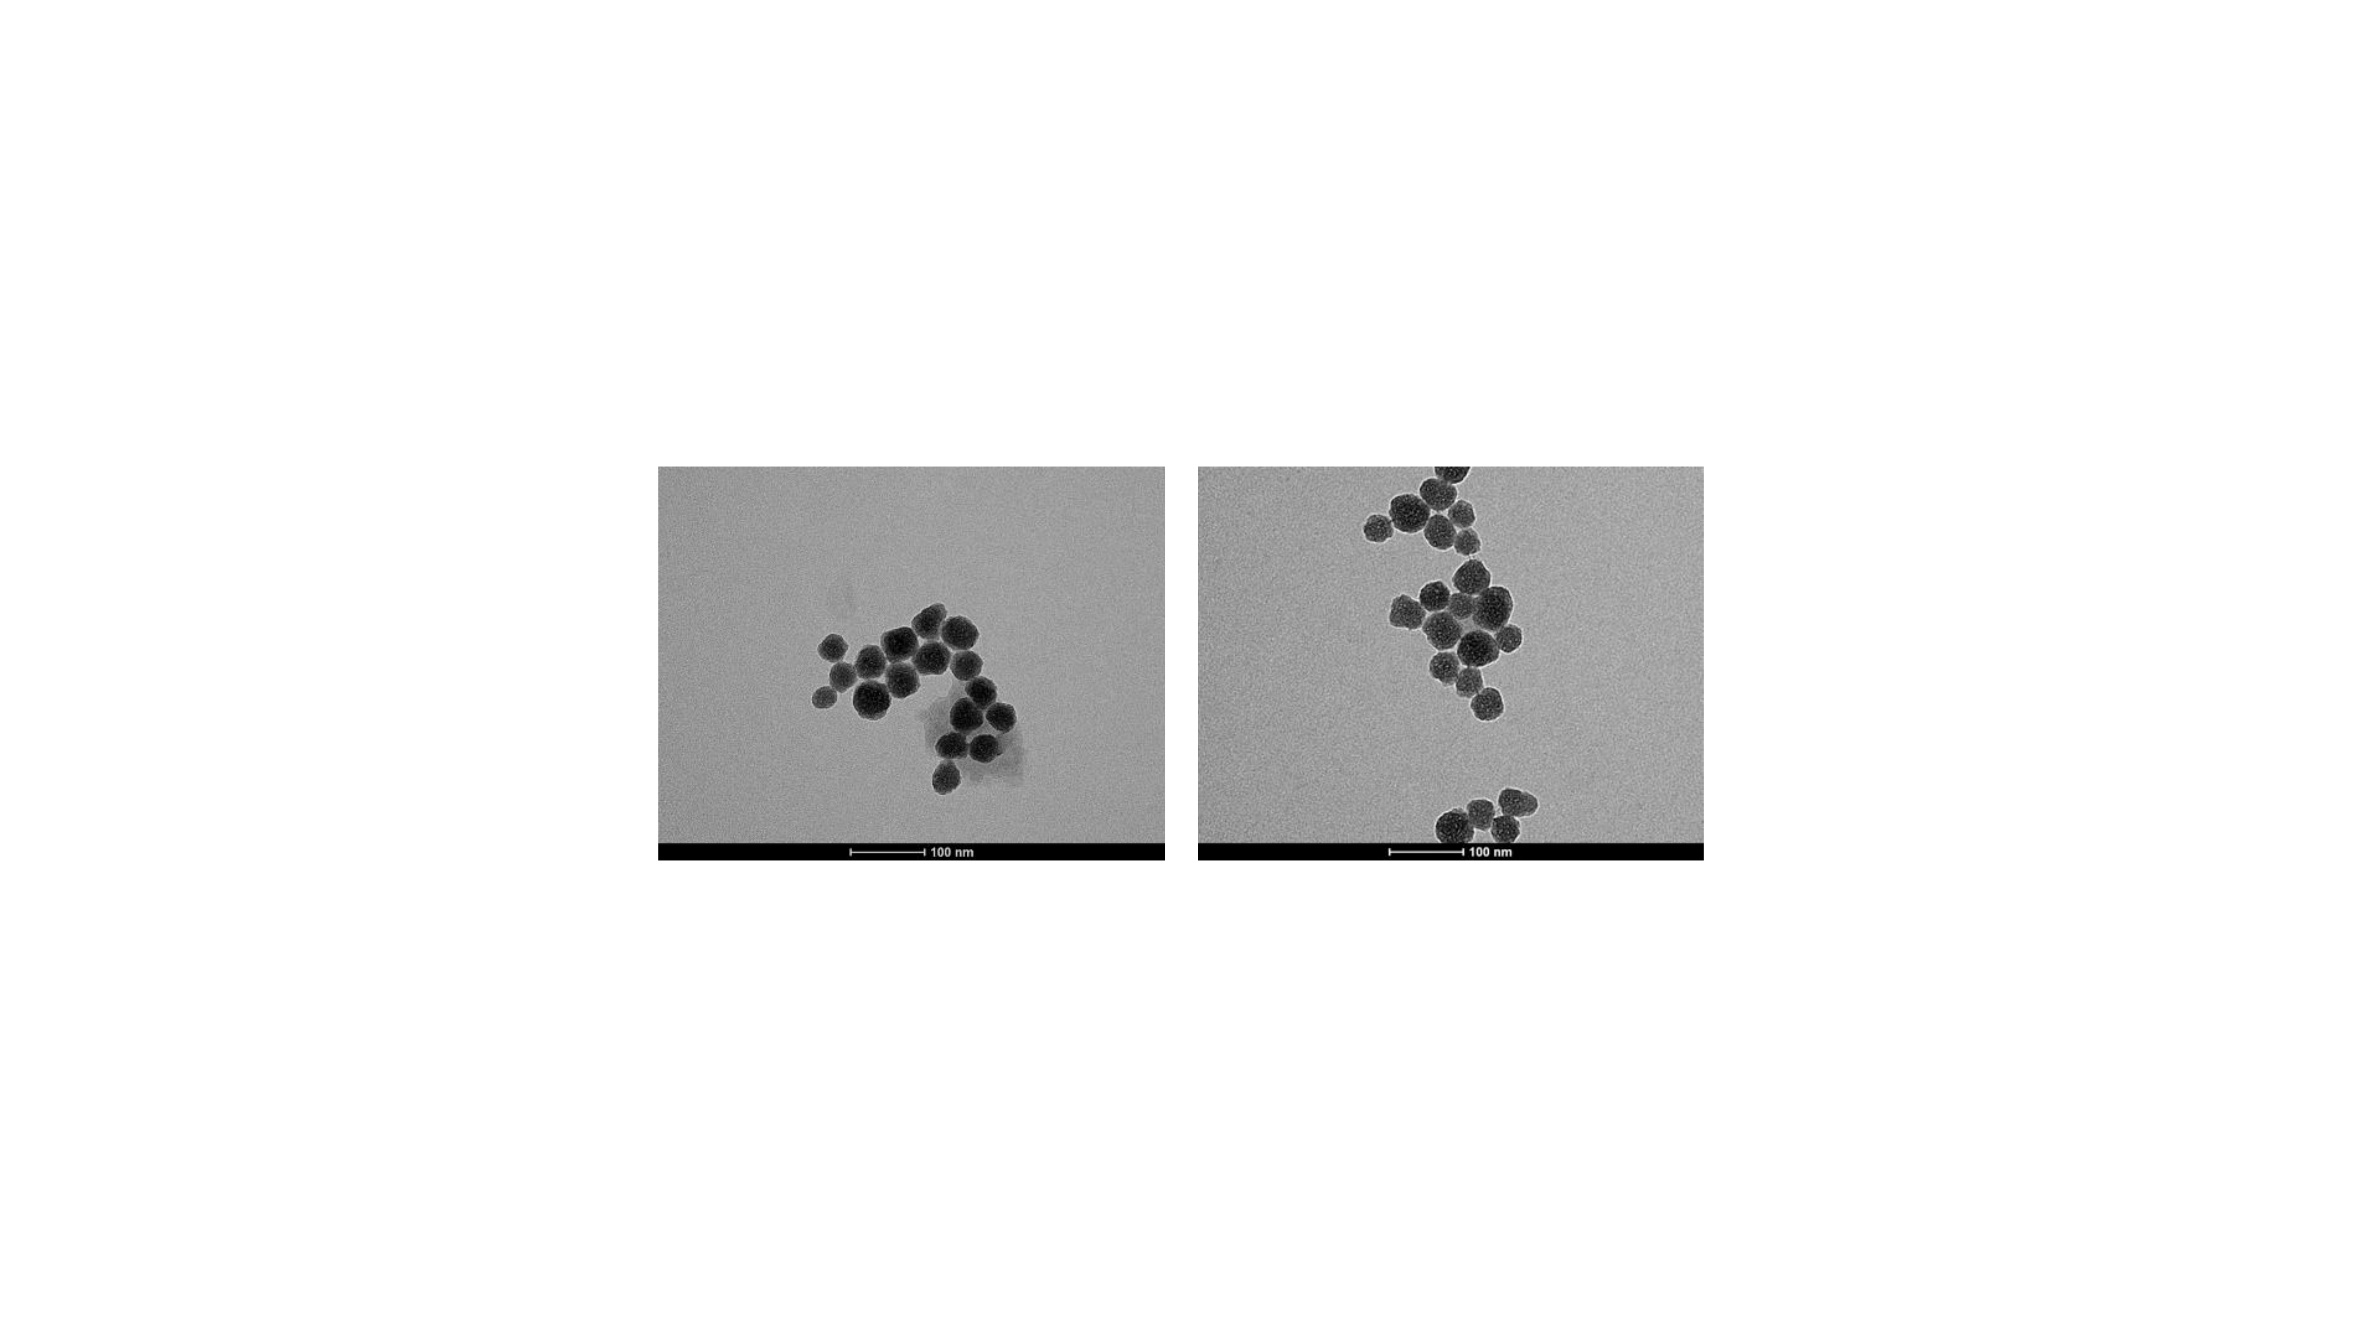


**Figure S3.** TEM images of SiNPs (left) and DOX-SiNPs (right). Scale bars indicate 100 nm.


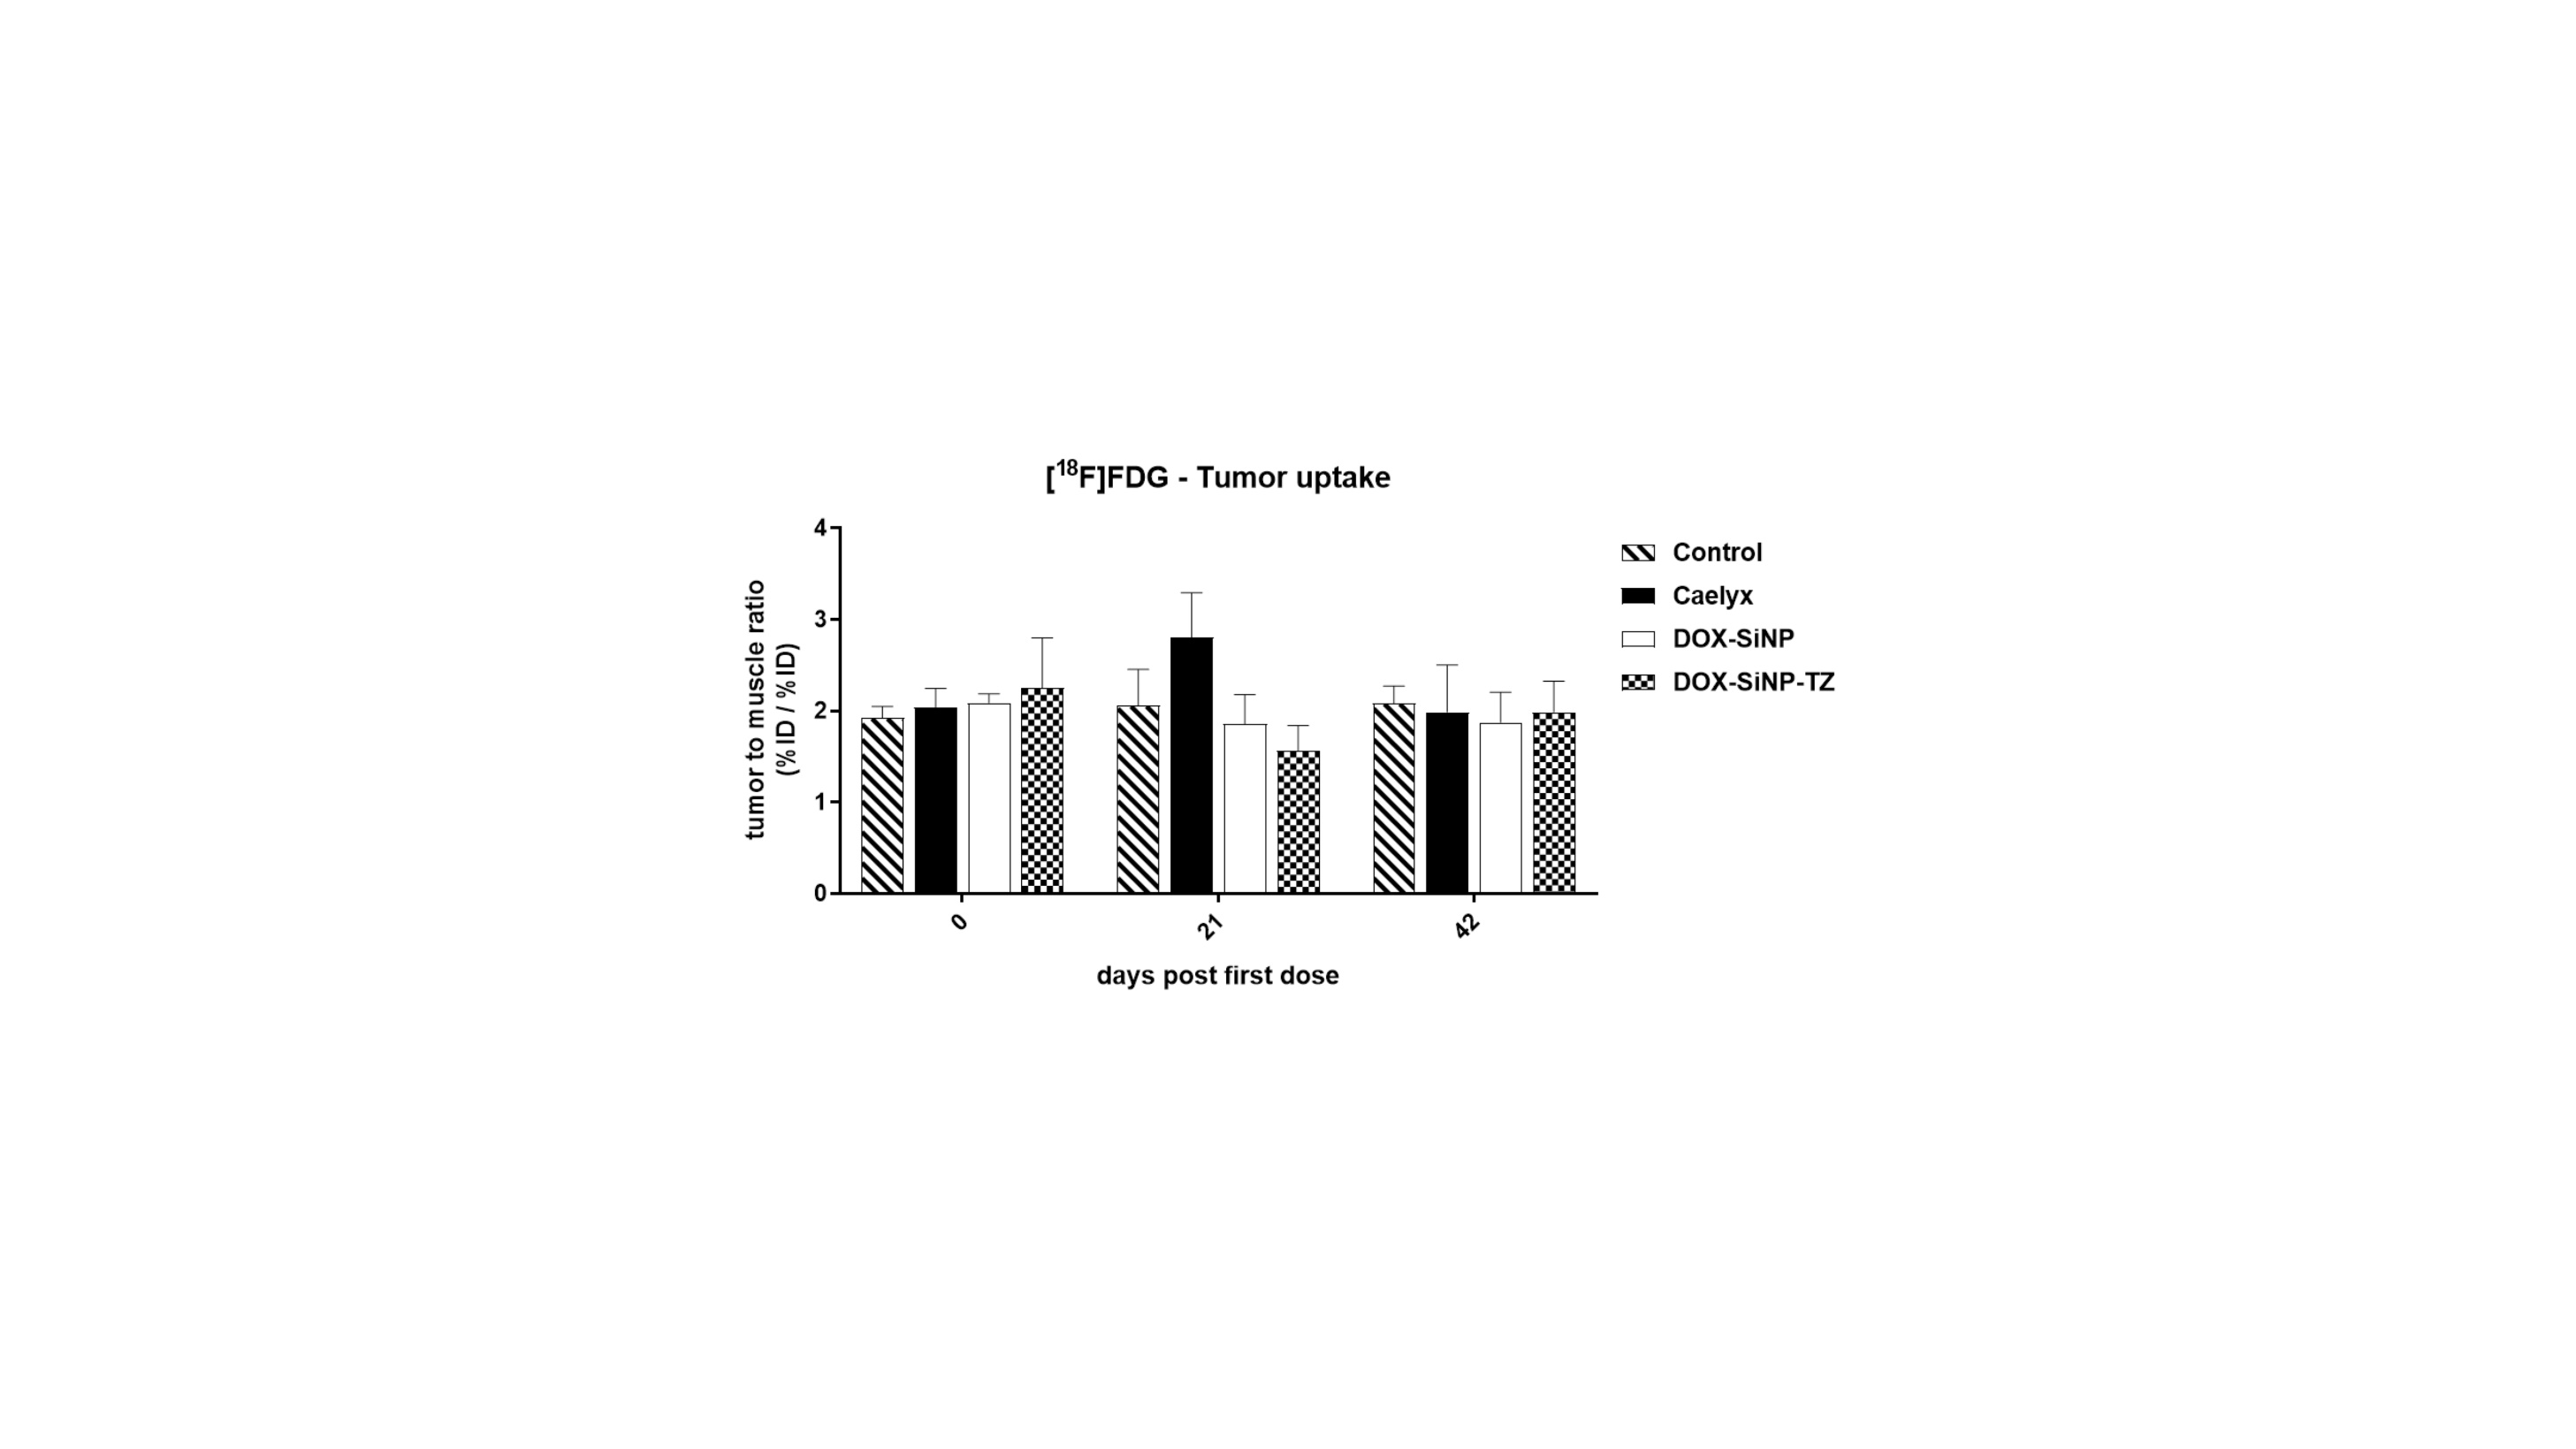


**Figure S4**.Tumor metabolism evaluation performed during the treatment efficacy study, by *in vivo* [18F]FDG PET imaging. Three mice per group were intravenously injected with about 3.7 MBq of [18F]FDG and 1 h post-injection were acquired. The study was performed the day before starting treatment, replicated at the third and at the sixth week. The radioactivity concentration in tumor was calculated as percentage of injected dose (%ID) and expressed as tumor to muscle ratio. Mean values calculated per group ± SEM.

***Proteomic profiling and treatment response***

**Table S3.** Complete list of the distinct proteins detected in Control, Caelyx, Dox-SiNPs and Dox-SiNPs-TZ 1:8 tumor tissues. For each protein are reported: Uniprot Accession, Reference, Gene name, Coverage, Unique Peptides, MW, pI, Score, Peptides, Peptide Spectrum Match (PSM) and Frequency. Frequency indicates how many times a given protein has been identified in the six replicates (three biological replicates for two technical runs) under each examined condition and/or overall in the 4 groups. The asterisks next to Scores, Peptides and PSMs indicate that the average values are given for each protein of the same condition.

| Uniprot Accession | Reference | Gene Name | Coverage | Unique Pep | MW [kDa] | pI | Control | | | | Caelyx | | | | Dox-SiNPs | | | | Dox-SiNPs-TZ | | | | Total | | | |
| --- | --- | --- | --- | --- | --- | --- | --- | --- | --- | --- | --- | --- | --- | --- | --- | --- | --- | --- | --- | --- | --- | --- | --- | --- | --- | --- |
| Score* | Pep* | PSM* | Freq | Score* | Pep* | PSM* | Freq | Score* | Pep* | PSM* | Freq | Score* | Pep* | PSM* | Freq | Score* | Pep* | PSM* | Overall Freq |
|
|  |
| P49327 | Fatty acid synthase | FASN | 35.64 | 51 | 273.3 | 6.44 | 62.23 | 18.17 | 41.33 | 6 | 63.32 | 18.17 | 45.83 | 6 | 72.94 | 19.83 | 46.67 | 6 | 66.38 | 22.17 | 52.33 | 6 | 66.21 | 19.58 | 46.54 | 4 |
| P04406 | Glyceraldehyde-3-phosphate dehydrogenase | GAPDH | 61.19 | 12 | 36.0 | 8.46 | 74.65 | 7.00 | 35.33 | 6 | 80.04 | 7.17 | 38.33 | 6 | 84.54 | 8.00 | 42.33 | 6 | 78.63 | 8.33 | 40.00 | 6 | 79.46 | 7.63 | 39.00 | 4 |
| G3XAI2 | Laminin subunit beta-1 | LAMB1 | 8.67 | 13 | 200.3 | 4.96 | 83.47 | 6.67 | 39.50 | 6 | 75.82 | 6.00 | 36.83 | 6 | 69.57 | 5.00 | 34.67 | 6 | 74.60 | 5.17 | 35.33 | 6 | 75.86 | 5.71 | 36.58 | 4 |
| Q9Y623 | Myosin-4 | MYH4 | 28.11 | 12 | 222.9 | 5.85 | 91.62 | 18.17 | 50.17 | 4 | 80.43 | 12.83 | 41.83 | 4 | 33.24 | 8.00 | 19.33 | 3 | 37.25 | 10.67 | 21.33 | 4 | 60.63 | 12.42 | 33.17 | 4 |
| P12882 | Myosin-1 | MYH1 | 32.18 | 7 | 223.0 | 5.74 | 89.06 | 19.33 | 52.17 | 4 | 65.95 | 11.83 | 37.50 | 3 | 26.77 | 7.67 | 17.50 | 3 | 33.30 | 10.33 | 20.83 | 4 | 53.77 | 12.29 | 32.00 | 4 |
| P05787 | Keratin, type II cytoskeletal 8 | KRT8 | 55.07 | 19 | 53.7 | 5.59 | 41.38 | 9.17 | 25.17 | 6 | 57.57 | 10.33 | 33.67 | 6 | 54.58 | 10.33 | 34.00 | 6 | 51.35 | 9.67 | 30.83 | 6 | 51.22 | 9.88 | 30.92 | 4 |
| P08727 | Keratin, type I cytoskeletal 19 | KRT19 | 63.50 | 18 | 44.1 | 5.14 | 36.32 | 6.50 | 22.33 | 6 | 55.90 | 7.67 | 31.33 | 6 | 67.09 | 9.67 | 35.67 | 6 | 62.14 | 8.83 | 33.83 | 6 | 55.36 | 8.17 | 30.79 | 4 |
| P60709 | Actin, cytoplasmic 1 | ACTB | 55.73 | 9 | 41.7 | 5.48 | 41.67 | 7.83 | 28.17 | 6 | 39.03 | 7.33 | 26.33 | 6 | 34.86 | 7.67 | 26.17 | 6 | 46.78 | 7.33 | 30.50 | 6 | 40.58 | 7.54 | 27.79 | 4 |
| P68133 | Actin, alpha skeletal muscle | ACTA1 | 54.91 | 4 | 42.0 | 5.39 | 44.01 | 7.83 | 30.83 | 6 | 38.31 | 6.00 | 26.50 | 6 | 36.49 | 5.83 | 26.17 | 6 | 38.76 | 6.00 | 27.67 | 6 | 39.39 | 6.42 | 27.79 | 4 |
| P02751 | Fibronectin | FN1 | 21.92 | 28 | 262.5 | 5.71 | 35.30 | 10.33 | 21.67 | 6 | 29.07 | 9.00 | 16.67 | 6 | 52.07 | 14.67 | 30.67 | 6 | 43.70 | 10.17 | 24.83 | 6 | 40.03 | 11.04 | 23.46 | 4 |
| Q9UKX2 | Myosin-2 | MYH2 | 26.69 | 1 | 222.9 | 5.82 | 66.66 | 16.17 | 39.17 | 4 | 42.29 | 9.67 | 25.00 | 2 | 18.18 | 5.50 | 12.00 | 2 | 24.93 | 8.33 | 15.50 | 4 | 38.01 | 9.92 | 22.92 | 4 |
| P13535 | Myosin-8 | MYH8 | 19.10 | 2 | 222.6 | 5.74 | 58.79 | 11.67 | 35.00 | 4 | 48.72 | 8.33 | 27.33 | 3 | 17.06 | 4.67 | 12.67 | 3 | 20.91 | 7.17 | 13.67 | 4 | 36.37 | 7.96 | 22.17 | 4 |
| P62736 | Actin, aortic smooth muscle | ACTA2 | 54.64 | 2 | 42.0 | 5.39 | 37.06 | 6.33 | 23.50 | 6 | 29.33 | 4.50 | 18.83 | 6 | 30.56 | 5.00 | 20.67 | 6 | 28.05 | 5.33 | 20.67 | 6 | 31.25 | 5.29 | 20.92 | 4 |
| P06702 | Protein S100-A9 | S100A9 | 80.70 | 9 | 13.2 | 6.13 | 23.13 | 4.00 | 15.33 | 6 | 32.64 | 4.50 | 19.83 | 6 | 46.58 | 4.33 | 26.50 | 6 | 36.34 | 4.67 | 21.83 | 6 | 34.67 | 4.38 | 20.88 | 4 |
| A0A2R8Y6G6 | Alpha-enolase | ENO1 | 36.64 | 8 | 47.3 | 6.99 | 24.29 | 4.50 | 13.33 | 6 | 37.84 | 6.17 | 21.00 | 6 | 37.09 | 6.50 | 21.17 | 6 | 34.90 | 6.50 | 20.33 | 6 | 33.53 | 5.92 | 18.96 | 4 |
| P07437 | Tubulin beta chain | TUBB | 58.56 | 3 | 49.6 | 4.89 | 25.78 | 5.33 | 13.17 | 6 | 33.14 | 7.00 | 16.50 | 6 | 40.54 | 7.83 | 21.50 | 6 | 37.55 | 6.67 | 19.50 | 6 | 34.25 | 6.71 | 17.67 | 4 |
| P14618 | Pyruvate kinase PKM | PKM | 42.56 | 9 | 57.9 | 7.84 | 24.21 | 6.50 | 15.50 | 6 | 26.18 | 6.67 | 16.17 | 6 | 31.88 | 8.00 | 19.67 | 6 | 29.25 | 7.33 | 18.17 | 6 | 27.88 | 7.13 | 17.38 | 4 |
| Q15063 | Periostin | POSTN | 10.41 | 5 | 93.3 | 7.53 | 30.39 | 2.67 | 18.00 | 6 | 21.94 | 2.00 | 12.83 | 6 | 28.64 | 2.50 | 17.83 | 6 | 36.99 | 2.17 | 20.33 | 6 | 29.49 | 2.33 | 17.25 | 4 |
| P05783 | Keratin, type I cytoskeletal 18 | KRT18 | 46.28 | 13 | 48.0 | 5.45 | 23.92 | 2.50 | 10.67 | 6 | 34.95 | 3.67 | 15.67 | 4 | 47.39 | 6.17 | 21.33 | 6 | 43.86 | 5.33 | 20.67 | 6 | 37.53 | 4.42 | 17.08 | 4 |
| P35579 | Myosin-9 | MYH9 | 21.22 | 23 | 226.4 | 5.60 | 21.42 | 7.83 | 13.67 | 6 | 25.46 | 9.33 | 15.33 | 6 | 25.91 | 11.33 | 18.67 | 6 | 25.75 | 10.83 | 19.50 | 6 | 24.64 | 9.83 | 16.79 | 4 |
| P21810 | Biglycan | BGN | 27.99 | 7 | 41.6 | 7.52 | 25.67 | 5.00 | 15.50 | 6 | 24.13 | 4.67 | 15.17 | 6 | 32.45 | 5.67 | 18.67 | 6 | 28.85 | 5.00 | 17.50 | 6 | 27.77 | 5.08 | 16.71 | 4 |
| A0A0U1RRH7 | Histone H2A |  | 24.71 | 1 | 18.5 | 11.52 | 29.64 | 1.50 | 17.17 | 6 | 30.62 | 1.83 | 16.33 | 6 | 27.38 | 1.50 | 15.33 | 6 | 26.86 | 1.50 | 15.17 | 6 | 28.62 | 1.58 | 16.00 | 4 |
| P13929 | Beta-enolase | ENO3 | 32.95 | 7 | 47.0 | 7.71 | 28.11 | 4.67 | 15.83 | 6 | 27.97 | 2.83 | 14.83 | 6 | 17.90 | 3.00 | 11.50 | 6 | 27.39 | 4.50 | 13.67 | 6 | 25.34 | 3.75 | 13.96 | 4 |
| F5H5D3 | Tubulin alpha chain | TUBA1C | 32.95 | 2 | 57.7 | 5.07 | 12.79 | 5.50 | 10.50 | 6 | 21.64 | 7.00 | 15.00 | 6 | 17.09 | 6.17 | 14.67 | 6 | 16.66 | 6.67 | 14.33 | 6 | 17.04 | 6.33 | 13.63 | 4 |
| U3KQK0 | Histone H2B | HIST1H2BN | 15.06 | 2 | 18.8 | 10.54 | 24.05 | 1.17 | 15.33 | 6 | 20.66 | 1.17 | 11.83 | 6 | 21.62 | 1.33 | 14.83 | 6 | 20.41 | 1.00 | 12.17 | 6 | 21.69 | 1.17 | 13.54 | 4 |
| P06576 | ATP synthase subunit beta, mitochondrial | ATP5F1B | 58.79 | 19 | 56.5 | 5.40 | 16.61 | 7.67 | 13.50 | 6 | 16.78 | 6.33 | 11.83 | 6 | 11.32 | 6.17 | 10.17 | 6 | 20.44 | 8.17 | 18.00 | 6 | 16.28 | 7.08 | 13.38 | 4 |
| Q99715 | Collagen alpha-1(XII) chain | COL12A1 | 11.66 | 23 | 332.9 | 5.53 | 17.67 | 7.50 | 14.00 | 6 | 12.51 | 6.33 | 9.67 | 6 | 21.96 | 8.67 | 15.83 | 6 | 18.59 | 6.67 | 13.83 | 6 | 17.68 | 7.29 | 13.33 | 4 |
| P68371 | Tubulin beta-4B chain | TUBB4B | 48.99 | 1 | 49.8 | 4.89 | 20.29 | 4.33 | 10.50 | 6 | 23.99 | 5.67 | 12.17 | 6 | 29.01 | 6.00 | 15.00 | 6 | 28.41 | 5.50 | 15.17 | 6 | 25.42 | 5.38 | 13.21 | 4 |
| P31151 | Protein S100-A7 | S100A7 | 45.54 | 4 | 11.5 | 6.77 | 14.76 | 1.83 | 8.00 | 4 | 23.24 | 2.67 | 11.00 | 6 | 36.13 | 3.50 | 19.67 | 6 | 25.47 | 2.83 | 12.33 | 6 | 24.90 | 2.71 | 12.75 | 4 |
| Q6S8J3 | POTE ankyrin domain family member E | POTEE | 6.88 | 2 | 121.3 | 6.20 | 15.12 | 3.17 | 13.50 | 6 | 13.82 | 3.00 | 12.17 | 6 | 11.20 | 3.00 | 10.67 | 6 | 16.74 | 3.50 | 13.83 | 6 | 14.22 | 3.17 | 12.54 | 4 |
| P10809 | 60 kDa heat shock protein, mitochondrial | HSPD1 | 20.42 | 8 | 61.0 | 5.87 | 22.41 | 3.00 | 9.17 | 6 | 32.31 | 2.50 | 11.50 | 4 | 33.06 | 4.17 | 14.17 | 6 | 39.05 | 3.50 | 15.17 | 6 | 31.71 | 3.29 | 12.50 | 4 |
| Q71U36 | Tubulin alpha-1A chain | TUBA1A | 37.92 | 1 | 50.1 | 5.06 | 12.19 | 5.00 | 9.67 | 6 | 19.13 | 6.17 | 13.50 | 6 | 15.34 | 5.50 | 13.00 | 6 | 14.40 | 6.00 | 12.33 | 6 | 15.26 | 5.67 | 12.13 | 4 |
| P06732 | Creatine kinase M-type | CKM | 32.28 | 8 | 43.1 | 7.25 | 24.18 | 3.33 | 14.17 | 4 | 23.80 | 2.17 | 13.33 | 4 | 15.37 | 2.33 | 7.67 | 6 | 17.48 | 3.00 | 10.00 | 4 | 20.21 | 2.71 | 11.29 | 4 |
| P13639 | Elongation factor 2 | EEF2 | 14.80 | 8 | 95.3 | 6.83 | 11.82 | 5.00 | 10.33 | 6 | 15.18 | 4.33 | 11.33 | 6 | 17.80 | 5.17 | 13.33 | 6 | 12.54 | 4.50 | 10.17 | 6 | 14.33 | 4.75 | 11.29 | 4 |
| P08729 | Keratin, type II cytoskeletal 7 | KRT7 | 27.08 | 8 | 51.4 | 5.48 | 8.94 | 4.00 | 8.50 | 6 | 15.45 | 4.67 | 11.17 | 6 | 15.96 | 5.67 | 12.17 | 6 | 17.70 | 4.50 | 12.00 | 6 | 14.51 | 4.71 | 10.96 | 4 |
| P04792 | Heat shock protein beta-1 | HSPB1 | 58.54 | 7 | 22.8 | 6.40 | 19.90 | 2.83 | 7.83 | 6 | 25.60 | 3.83 | 10.33 | 6 | 39.45 | 4.00 | 14.33 | 6 | 28.74 | 3.17 | 10.83 | 6 | 28.42 | 3.46 | 10.83 | 4 |
| P11047 | Laminin subunit gamma-1 | LAMC1 | 10.07 | 10 | 177.5 | 5.12 | 15.30 | 4.17 | 11.17 | 6 | 14.44 | 4.33 | 10.50 | 6 | 16.50 | 5.50 | 12.17 | 6 | 13.36 | 4.00 | 9.17 | 6 | 14.90 | 4.50 | 10.75 | 4 |
| P00558 | Phosphoglycerate kinase 1 | PGK1 | 47.00 | 12 | 44.6 | 8.10 | 6.64 | 4.00 | 5.83 | 6 | 15.80 | 6.00 | 12.67 | 6 | 19.06 | 6.17 | 12.83 | 6 | 17.89 | 4.50 | 10.33 | 6 | 14.84 | 5.17 | 10.42 | 4 |
| P18206 | Vinculin | VCL | 20.55 | 12 | 123.7 | 5.66 | 13.88 | 4.00 | 9.00 | 6 | 14.07 | 4.83 | 10.50 | 6 | 13.64 | 5.00 | 10.33 | 6 | 14.23 | 4.67 | 11.17 | 6 | 13.95 | 4.63 | 10.25 | 4 |
| P31949 | Protein S100-A11 | S100A11 | 18.10 | 2 | 11.7 | 7.12 | 19.45 | 1.00 | 8.83 | 6 | 22.11 | 1.17 | 9.50 | 6 | 28.21 | 1.00 | 12.33 | 6 | 17.96 | 1.00 | 8.50 | 6 | 21.93 | 1.04 | 9.79 | 4 |
| P07237 | Protein disulfide-isomerase | P4HB | 21.85 | 9 | 57.1 | 4.87 | 17.82 | 2.17 | 7.50 | 6 | 21.75 | 2.17 | 8.83 | 4 | 26.65 | 3.00 | 11.00 | 6 | 31.82 | 2.33 | 11.33 | 6 | 24.51 | 2.42 | 9.67 | 4 |
| P11142 | Heat shock coate 71 kDa protein | HSPA8 | 25.23 | 11 | 70.9 | 5.52 | 11.03 | 4.50 | 7.83 | 6 | 15.06 | 6.00 | 11.33 | 6 | 12.95 | 5.33 | 10.50 | 6 | 12.74 | 5.00 | 8.50 | 6 | 12.95 | 5.21 | 9.54 | 4 |
| P08670 | Vimentin | VIM | 21.24 | 10 | 53.6 | 5.12 | 14.92 | 4.33 | 10.33 | 6 | 12.87 | 3.67 | 8.67 | 6 | 17.29 | 4.17 | 10.50 | 6 | 13.49 | 3.67 | 8.67 | 6 | 14.64 | 3.96 | 9.54 | 4 |
| A0A0B4J269 | Uncharacterized protein |  | 17.19 | 3 | 88.3 | 5.86 | 13.58 | 3.33 | 8.00 | 6 | 13.66 | 4.00 | 8.33 | 6 | 16.22 | 4.83 | 10.67 | 6 | 14.19 | 3.67 | 9.67 | 6 | 14.41 | 3.96 | 9.17 | 4 |
| J3KPS3 | Fructose-bisphosphate aldolase | ALDOA | 37.50 | 9 | 39.8 | 8.09 | 12.01 | 3.67 | 8.33 | 6 | 14.88 | 4.83 | 10.33 | 6 | 13.48 | 4.17 | 9.17 | 6 | 14.45 | 3.17 | 8.83 | 6 | 13.71 | 3.96 | 9.17 | 4 |
| P11055 | Myosin-3 | MYH3 | 12.16 | 1 | 223.8 | 5.81 | 30.09 | 7.33 | 16.67 | 4 | 16.76 | 4.83 | 10.17 | 3 | 7.64 | 2.17 | 4.67 | 2 | 8.25 | 2.67 | 5.00 | 4 | 15.68 | 4.25 | 9.13 | 4 |
| Q32Q12 | Nucleoside diphosphate kinase | NME1-NME2 | 31.51 | 4 | 32.6 | 8.48 | 13.17 | 1.33 | 6.33 | 6 | 20.00 | 1.33 | 9.50 | 6 | 20.96 | 1.67 | 10.67 | 6 | 19.77 | 1.50 | 9.83 | 6 | 18.47 | 1.46 | 9.08 | 4 |
| P50395 | Rab GDP dissociation inhibitor beta | GDI2 | 24.72 | 7 | 50.6 | 6.47 | 11.56 | 2.67 | 7.33 | 6 | 10.80 | 3.33 | 8.17 | 6 | 18.52 | 3.67 | 10.50 | 6 | 14.83 | 3.33 | 9.33 | 6 | 13.93 | 3.25 | 8.83 | 4 |
| H3BPK4 | Myosin regulatory light chain 2, skeletal muscle isoform (Fragment) | MYLPF | 36.68 | 6 | 22.0 | 5.81 | 14.26 | 1.83 | 8.67 | 4 | 15.59 | 1.33 | 9.00 | 2 | 9.78 | 0.83 | 5.83 | 2 | 16.38 | 2.17 | 10.83 | 4 | 14.00 | 1.54 | 8.58 | 4 |
| P60174 | Triosephosphate isomerase | TPI1 | 25.87 | 5 | 30.8 | 5.92 | 4.89 | 3.50 | 7.00 | 6 | 8.26 | 3.67 | 8.83 | 6 | 7.65 | 3.83 | 8.00 | 6 | 10.19 | 3.67 | 9.33 | 6 | 7.74 | 3.67 | 8.29 | 4 |
| H3BR70 | Pyruvate kinase | PKM | 33.61 | 1 | 40.2 | 8.03 | 12.79 | 3.00 | 7.17 | 6 | 12.91 | 3.17 | 7.67 | 6 | 17.24 | 3.67 | 9.50 | 6 | 16.42 | 3.00 | 8.67 | 6 | 14.84 | 3.21 | 8.25 | 4 |
| A0A087WVQ6 | Clathrin heavy chain | CLTC | 22.04 | 20 | 191.9 | 5.69 | 8.89 | 4.50 | 6.33 | 6 | 12.09 | 6.17 | 7.83 | 5 | 13.77 | 6.50 | 8.67 | 6 | 13.49 | 7.00 | 9.83 | 6 | 12.06 | 6.04 | 8.17 | 4 |
| P62805 | Histone H4 | HIST1H4A | 41.75 | 5 | 11.4 | 11.36 | 9.06 | 3.50 | 8.33 | 6 | 7.78 | 3.33 | 7.67 | 6 | 7.59 | 3.33 | 7.50 | 6 | 6.00 | 3.00 | 6.83 | 6 | 7.61 | 3.29 | 7.58 | 4 |
| P58107 | Epiplakin | EPPK1 | 21.88 | 8 | 555.3 | 5.62 | 10.93 | 3.00 | 5.67 | 6 | 15.71 | 3.17 | 8.17 | 4 | 15.46 | 2.83 | 7.50 | 6 | 16.03 | 4.00 | 8.83 | 6 | 14.53 | 3.25 | 7.54 | 4 |
| P68104 | Elongation factor 1-alpha 1 | EEF1A1 | 24.68 | 3 | 50.1 | 9.01 | 7.61 | 3.17 | 5.83 | 6 | 8.38 | 3.67 | 7.00 | 6 | 14.39 | 4.50 | 9.17 | 6 | 12.09 | 4.50 | 8.17 | 6 | 10.62 | 3.96 | 7.54 | 4 |
| P12111 | Collagen alpha-3(VI) chain | COL6A3 | 2.36 | 5 | 343.5 | 6.68 | 13.05 | 2.00 | 6.83 | 6 | 9.74 | 1.83 | 5.33 | 6 | 19.51 | 2.17 | 10.50 | 6 | 14.12 | 2.00 | 7.17 | 6 | 14.10 | 2.00 | 7.46 | 4 |
| P37802 | Transgelin-2 | TAGLN2 | 22.11 | 3 | 22.4 | 8.25 | 12.02 | 1.33 | 5.83 | 6 | 15.88 | 1.67 | 8.50 | 6 | 16.43 | 2.00 | 8.33 | 6 | 12.43 | 1.50 | 7.00 | 6 | 14.19 | 1.63 | 7.42 | 4 |
| P09104 | Gamma-enolase | ENO2 | 7.14 | 1 | 47.2 | 5.03 | 12.13 | 1.00 | 7.00 | 6 | 14.38 | 1.00 | 8.00 | 6 | 11.62 | 1.17 | 7.50 | 6 | 14.22 | 1.00 | 6.83 | 6 | 13.09 | 1.04 | 7.33 | 4 |
| Q9Y490 | Talin-1 | TLN1 | 5.55 | 6 | 269.6 | 6.07 | 7.37 | 2.50 | 6.17 | 6 | 9.77 | 2.67 | 6.33 | 5 | 12.14 | 3.50 | 9.00 | 6 | 9.98 | 3.17 | 7.00 | 6 | 9.81 | 2.96 | 7.13 | 4 |
| P25391 | Laminin subunit alpha-1 | LAMA1 | 3.22 | 8 | 336.9 | 6.35 | 8.02 | 3.00 | 7.17 | 5 | 9.06 | 4.17 | 7.83 | 6 | 10.03 | 4.67 | 8.67 | 6 | 3.32 | 2.67 | 4.17 | 6 | 7.61 | 3.63 | 6.96 | 4 |
| P55060 | Exportin-2 | CSE1L | 12.77 | 6 | 110.3 | 5.77 | 8.91 | 2.33 | 5.50 | 5 | 12.43 | 2.17 | 6.00 | 4 | 16.42 | 2.50 | 8.67 | 6 | 12.96 | 3.00 | 7.50 | 6 | 12.68 | 2.50 | 6.92 | 4 |
| P13533 | Myosin-6 | MYH6 | 10.31 | 6 | 223.6 | 5.73 | 15.83 | 6.00 | 10.83 | 4 | 12.32 | 3.83 | 8.83 | 2 | 7.15 | 2.00 | 4.00 | 2 | 6.01 | 2.50 | 3.83 | 4 | 10.33 | 3.58 | 6.88 | 4 |
| Q562R1 | Beta-actin-like protein 2 | ACTBL2 | 22.87 | 2 | 42.0 | 5.59 | 7.07 | 2.17 | 8.00 | 6 | 6.98 | 2.00 | 7.67 | 6 | 5.14 | 1.67 | 5.50 | 6 | 6.22 | 1.50 | 6.17 | 6 | 6.35 | 1.83 | 6.83 | 4 |
| E7EMB3 | Calmodulin-2 | CALM2 | 33.67 | 4 | 21.7 | 4.56 | 4.36 | 2.17 | 3.50 | 6 | 11.59 | 3.17 | 7.67 | 6 | 13.09 | 3.00 | 8.50 | 6 | 9.83 | 2.67 | 6.83 | 6 | 9.72 | 2.75 | 6.63 | 4 |
| O43707 | Alpha-actinin-4 | ACTN4 | 26.13 | 7 | 104.8 | 5.44 | 6.15 | 4.00 | 5.50 | 6 | 7.96 | 4.33 | 6.83 | 6 | 10.10 | 4.83 | 6.50 | 6 | 8.57 | 4.83 | 7.33 | 6 | 8.20 | 4.50 | 6.54 | 4 |
| P25705 | ATP synthase subunit alpha, mitochondrial | ATP5F1A | 32.73 | 12 | 59.7 | 9.13 | 13.56 | 3.67 | 7.50 | 6 | 12.44 | 4.33 | 6.83 | 6 | 6.74 | 2.83 | 4.33 | 5 | 12.14 | 4.50 | 7.33 | 6 | 11.22 | 3.83 | 6.50 | 4 |
| P16104 | Histone H2AX | H2AFX | 32.17 | 1 | 15.1 | 10.74 | 13.53 | 1.50 | 7.17 | 6 | 10.37 | 1.83 | 6.50 | 6 | 9.82 | 1.50 | 6.67 | 6 | 9.92 | 1.50 | 5.67 | 6 | 10.91 | 1.58 | 6.50 | 4 |
| P00338 | L-lactate dehydrogenase A chain | LDHA | 32.83 | 10 | 36.7 | 8.27 | 9.86 | 3.50 | 6.67 | 6 | 11.26 | 3.00 | 6.67 | 6 | 10.88 | 3.33 | 6.83 | 6 | 5.59 | 2.83 | 5.17 | 6 | 9.40 | 3.17 | 6.33 | 4 |
| P13646 | Keratin, type I cytoskeletal 13 | KRT13 | 7.42 | 1 | 49.6 | 4.96 | 6.46 | 1.33 | 4.50 | 6 | 10.74 | 1.50 | 7.00 | 6 | 10.48 | 1.50 | 6.33 | 6 | 9.13 | 2.00 | 6.83 | 6 | 9.20 | 1.58 | 6.17 | 4 |
| O14983 | Sarcoplasmic/endoplasmic reticulum calcium ATPase 1 | ATP2A1 | 17.28 | 10 | 110.2 | 5.16 | 11.67 | 4.00 | 8.17 | 4 | 10.02 | 1.67 | 6.33 | 4 | 4.14 | 1.83 | 3.33 | 3 | 10.47 | 2.83 | 6.33 | 5 | 9.07 | 2.58 | 6.04 | 4 |
| P12814 | Alpha-actinin-1 | ACTN1 | 24.89 | 8 | 103.0 | 5.41 | 6.47 | 3.50 | 4.83 | 5 | 7.90 | 4.50 | 6.83 | 6 | 9.41 | 4.33 | 5.83 | 6 | 6.76 | 4.33 | 6.50 | 6 | 7.63 | 4.17 | 6.00 | 4 |
| Q01518 | Adenylyl cyclase-associated protein 1 | CAP1 | 11.79 | 3 | 51.9 | 8.06 | 7.61 | 1.50 | 4.33 | 6 | 9.74 | 1.50 | 5.67 | 4 | 12.65 | 2.00 | 7.83 | 6 | 9.38 | 1.67 | 5.00 | 6 | 9.84 | 1.67 | 5.71 | 4 |
| Q9UKX3 | Myosin-13 | MYH13 | 9.80 | 1 | 223.5 | 5.68 | 12.31 | 5.50 | 10.00 | 4 | 11.64 | 3.83 | 7.33 | 2 | 4.74 | 1.83 | 3.00 | 2 | 3.51 | 1.67 | 2.50 | 4 | 8.05 | 3.21 | 5.71 | 4 |
| E9PK25 | Cofilin-1 | CFL1 | 34.31 | 3 | 22.7 | 8.34 | 8.96 | 3.00 | 4.50 | 6 | 9.78 | 3.33 | 5.83 | 6 | 11.37 | 2.83 | 6.50 | 6 | 8.27 | 2.50 | 5.17 | 6 | 9.59 | 2.92 | 5.50 | 4 |
| P29401 | Transketolase | TKT | 14.77 | 5 | 67.8 | 7.66 | 5.05 | 1.83 | 2.67 | 5 | 9.64 | 2.17 | 5.33 | 4 | 13.90 | 3.17 | 7.33 | 6 | 10.86 | 2.83 | 5.00 | 6 | 9.86 | 2.50 | 5.08 | 4 |
| P05976 | Myosin light chain 1/3, skeletal muscle isoform | MYL1 | 30.93 | 6 | 21.1 | 5.03 | 10.32 | 1.50 | 5.00 | 5 | 17.59 | 1.50 | 8.17 | 2 | 2.86 | 1.00 | 2.33 | 2 | 8.31 | 1.83 | 4.83 | 4 | 9.77 | 1.46 | 5.08 | 4 |
| E7EQR4 | Ezrin | EZR | 10.41 | 3 | 69.3 | 6.16 | 7.69 | 2.00 | 4.83 | 6 | 7.41 | 2.00 | 4.83 | 5 | 8.63 | 2.17 | 5.67 | 6 | 6.70 | 1.83 | 4.33 | 6 | 7.61 | 2.00 | 4.92 | 4 |
| P08758 | Annexin A5 | ANXA5 | 24.69 | 7 | 35.9 | 5.05 | 4.47 | 2.83 | 3.50 | 6 | 6.68 | 3.00 | 4.83 | 6 | 4.72 | 2.50 | 4.33 | 6 | 7.30 | 3.83 | 6.33 | 6 | 5.79 | 3.04 | 4.75 | 4 |
| P06748 | Nucleophosmin | NPM1 | 25.85 | 5 | 32.6 | 4.78 | 4.79 | 2.17 | 3.67 | 6 | 7.47 | 1.83 | 4.17 | 6 | 8.48 | 3.33 | 6.00 | 6 | 7.86 | 2.17 | 4.50 | 6 | 7.15 | 2.38 | 4.58 | 4 |
| P40926 | Malate dehydrogenase, mitochondrial | MDH2 | 19.53 | 4 | 35.5 | 8.68 | 6.63 | 1.50 | 3.50 | 6 | 7.26 | 2.00 | 4.83 | 6 | 9.07 | 2.33 | 4.50 | 6 | 9.94 | 2.17 | 4.50 | 6 | 8.22 | 2.00 | 4.33 | 4 |
| P08238 | Heat shock protein HSP 90-beta | HSP90AB1 | 21.41 | 5 | 83.2 | 5.03 | 5.22 | 3.00 | 3.67 | 6 | 3.28 | 3.17 | 4.17 | 6 | 5.79 | 2.67 | 4.67 | 6 | 6.70 | 2.83 | 4.67 | 6 | 5.25 | 2.92 | 4.29 | 4 |
| A0A2U3TZH3 | Elongation factor 1-alpha | EEF1A2 | 28.63 | 4 | 54.3 | 9.04 | 5.34 | 2.67 | 4.50 | 6 | 5.39 | 2.67 | 4.33 | 6 | 6.23 | 3.17 | 4.67 | 6 | 3.44 | 2.67 | 3.67 | 6 | 5.10 | 2.79 | 4.29 | 4 |
| P13796 | Plastin-2 | LCP1 | 16.91 | 6 | 70.2 | 5.43 | 5.02 | 1.67 | 3.17 | 6 | 4.95 | 2.17 | 4.50 | 4 | 5.72 | 1.83 | 4.67 | 6 | 4.89 | 2.17 | 4.67 | 6 | 5.14 | 1.96 | 4.25 | 4 |
| P40227 | T-complex protein 1 subunit zeta | CCT6A | 11.30 | 4 | 58.0 | 6.68 | 4.90 | 0.83 | 3.33 | 5 | 6.49 | 1.33 | 3.50 | 4 | 9.88 | 1.67 | 6.00 | 6 | 7.48 | 1.00 | 3.67 | 6 | 7.19 | 1.21 | 4.13 | 4 |
| Q06828 | Fibromodulin | FMOD | 10.90 | 3 | 43.2 | 6.04 | 4.21 | 1.50 | 3.50 | 6 | 5.14 | 1.50 | 2.67 | 6 | 8.29 | 2.00 | 5.67 | 6 | 8.30 | 1.33 | 4.33 | 5 | 6.49 | 1.58 | 4.04 | 4 |
| A0A087WSZ2 | Alpha-actinin-3 | ACTN3 | 19.28 | 9 | 107.6 | 6.39 | 3.90 | 3.67 | 5.50 | 4 | 5.01 | 3.00 | 5.17 | 5 | 2.37 | 1.17 | 1.50 | 3 | 2.44 | 2.50 | 3.00 | 5 | 3.43 | 2.58 | 3.79 | 4 |
| A7XZE4 | Beta tropomyosin isoform | TPM2 | 26.76 | 2 | 33.0 | 4.69 | 4.73 | 1.83 | 4.00 | 4 | 5.81 | 2.33 | 4.83 | 4 | 3.70 | 2.00 | 2.83 | 4 | 4.97 | 2.17 | 3.17 | 6 | 4.80 | 2.08 | 3.71 | 4 |
| P13804 | Electron transfer flavoprotein subunit alpha, mitochondrial | ETFA | 15.02 | 3 | 35.1 | 8.38 | 7.55 | 1.67 | 3.50 | 6 | 3.40 | 1.00 | 2.17 | 4 | 4.92 | 2.17 | 4.00 | 6 | 6.77 | 2.17 | 5.00 | 6 | 5.66 | 1.75 | 3.67 | 4 |
| P61978 | Heterogeneous nuclear ribonucleoprotein K | HNRNPK | 18.36 | 5 | 50.9 | 5.54 | 4.05 | 1.50 | 2.33 | 6 | 4.32 | 2.17 | 3.83 | 6 | 6.55 | 2.17 | 4.33 | 6 | 5.68 | 2.17 | 4.17 | 5 | 5.15 | 2.00 | 3.67 | 4 |
| B7Z6Z4 | cDNA FLJ56329, highly similar to Myosin light polypeptide 6 | MYL6 | 19.75 | 3 | 26.7 | 5.08 | 5.33 | 2.00 | 3.33 | 6 | 4.48 | 1.67 | 2.67 | 5 | 7.00 | 2.83 | 4.67 | 6 | 6.29 | 1.67 | 3.83 | 6 | 5.77 | 2.04 | 3.63 | 4 |
| P35609 | Alpha-actinin-2 | ACTN2 | 22.71 | 9 | 103.8 | 5.45 | 3.21 | 2.83 | 4.00 | 5 | 5.16 | 3.50 | 5.33 | 5 | 2.73 | 1.83 | 2.00 | 5 | 2.86 | 2.33 | 3.00 | 5 | 3.49 | 2.63 | 3.58 | 4 |
| P51888 | Prolargin | PRELP | 9.95 | 3 | 43.8 | 9.38 | 5.41 | 2.00 | 4.00 | 6 | 5.01 | 1.50 | 3.00 | 4 | 7.74 | 2.17 | 4.50 | 6 | 2.86 | 1.33 | 2.50 | 6 | 5.25 | 1.75 | 3.50 | 4 |
| Q9BUF5 | Tubulin beta-6 chain | TUBB6 | 26.68 | 2 | 49.8 | 4.88 | 4.91 | 1.33 | 3.00 | 5 | 7.10 | 2.50 | 4.17 | 6 | 4.46 | 1.83 | 3.50 | 6 | 4.53 | 1.17 | 3.00 | 6 | 5.25 | 1.71 | 3.42 | 4 |
| P07900 | Heat shock protein HSP 90-alpha | HSP90AA1 | 14.89 | 3 | 84.6 | 5.02 | 3.49 | 2.33 | 2.67 | 6 | 4.22 | 2.67 | 3.67 | 5 | 5.30 | 2.50 | 4.33 | 6 | 4.63 | 2.00 | 3.00 | 6 | 4.41 | 2.38 | 3.42 | 4 |
| P36871 | Phosphoglucomutase-1 | PGM1 | 22.95 | 6 | 61.4 | 6.76 | 2.97 | 1.83 | 2.83 | 6 | 3.36 | 1.33 | 2.50 | 6 | 5.42 | 2.00 | 3.50 | 6 | 5.34 | 2.50 | 4.33 | 6 | 4.27 | 1.92 | 3.29 | 4 |
| P38646 | Stress-70 protein, mitochondrial | HSPA9 | 11.49 | 5 | 73.6 | 6.16 | 2.28 | 1.50 | 1.67 | 4 | 7.27 | 3.00 | 4.83 | 5 | 4.07 | 2.17 | 2.83 | 6 | 5.56 | 2.17 | 3.50 | 5 | 4.79 | 2.21 | 3.21 | 4 |
| P07737 | Profilin-1 | PFN1 | 50.00 | 5 | 15.0 | 8.27 | 4.83 | 1.33 | 2.67 | 5 | 4.83 | 1.67 | 3.00 | 6 | 6.72 | 1.83 | 4.00 | 6 | 5.89 | 1.33 | 3.17 | 6 | 5.57 | 1.54 | 3.21 | 4 |
| Q3ZCM7 | Tubulin beta-8 chain | TUBB8 | 19.82 | 1 | 49.7 | 4.89 | 4.38 | 1.17 | 2.67 | 5 | 5.79 | 1.67 | 3.17 | 6 | 4.75 | 2.00 | 4.00 | 6 | 4.53 | 1.17 | 3.00 | 6 | 4.86 | 1.50 | 3.21 | 4 |
| J3QRS3 | Myosin regulatory light chain 12A | MYL12A | 25.42 | 3 | 20.4 | 4.75 | 4.79 | 1.50 | 3.00 | 6 | 5.96 | 1.67 | 3.67 | 6 | 4.72 | 1.50 | 2.83 | 6 | 5.35 | 1.67 | 3.17 | 6 | 5.21 | 1.58 | 3.17 | 4 |
| P55072 | Transitional endoplasmic reticulum ATPase | VCP | 17.74 | 9 | 89.3 | 5.26 | 5.49 | 1.67 | 3.50 | 5 | 2.91 | 1.33 | 2.17 | 5 | 2.98 | 1.50 | 2.33 | 6 | 6.95 | 2.50 | 4.67 | 6 | 4.58 | 1.75 | 3.17 | 4 |
| P52597 | Heterogeneous nuclear ribonucleoprotein F | HNRNPF | 12.53 | 2 | 45.6 | 5.58 | 4.30 | 1.33 | 2.67 | 5 | 5.34 | 1.67 | 3.33 | 6 | 5.36 | 1.50 | 3.00 | 6 | 5.49 | 1.50 | 3.33 | 6 | 5.12 | 1.50 | 3.08 | 4 |
| Q5TCU3 | Tropomyosin beta chain | TPM2 | 28.17 | 2 | 32.8 | 4.68 | 4.71 | 2.50 | 3.83 | 5 | 3.88 | 2.50 | 3.33 | 5 | 3.88 | 2.00 | 3.00 | 5 | 2.72 | 1.67 | 2.17 | 6 | 3.80 | 2.17 | 3.08 | 4 |
| Q6ZN40 | Tropomyosin 1 (Alpha), isoform CRA_f | TPM1 | 27.91 | 1 | 37.4 | 4.72 | 4.30 | 2.17 | 3.83 | 4 | 1.53 | 1.67 | 2.17 | 3 | 3.46 | 2.17 | 2.83 | 6 | 4.71 | 2.50 | 3.17 | 5 | 3.50 | 2.13 | 3.00 | 4 |
| E9PF18 | Hydroxyacyl-coenzyme A dehydrogenase, mitochondrial | HADH | 22.82 | 3 | 42.1 | 9.26 | 3.17 | 1.67 | 2.17 | 5 | 4.70 | 1.33 | 2.33 | 4 | 5.75 | 1.83 | 3.17 | 6 | 7.82 | 1.83 | 4.33 | 6 | 5.36 | 1.67 | 3.00 | 4 |
| A0A0C4DG17 | 40S ribosomal protein SA | RPSA | 22.67 | 4 | 33.3 | 4.87 | 2.86 | 2.00 | 2.50 | 6 | 5.06 | 2.17 | 3.17 | 5 | 3.30 | 2.00 | 2.67 | 6 | 5.55 | 2.17 | 3.33 | 6 | 4.19 | 2.08 | 2.92 | 4 |
| P63104 | 14-3-3 protein zeta/delta | YWHAZ | 22.45 | 3 | 27.7 | 4.79 | 5.70 | 1.83 | 3.00 | 6 | 5.66 | 1.83 | 3.00 | 6 | 5.15 | 1.33 | 2.50 | 6 | 4.88 | 1.83 | 3.00 | 6 | 5.34 | 1.71 | 2.88 | 4 |
| P19971 | Thymidine phosphorylase | TYMP | 18.26 | 4 | 49.9 | 5.53 | 2.70 | 0.67 | 1.17 | 3 | 6.56 | 1.17 | 2.50 | 4 | 11.12 | 2.00 | 4.50 | 6 | 8.06 | 1.83 | 3.33 | 6 | 7.11 | 1.42 | 2.88 | 4 |
| A0A0S2Z4G6 | Tropomyosin 1 (Alpha), isoform CRA_o (Fragment) | TPM1 | 29.58 | 1 | 32.7 | 4.74 | 4.30 | 2.00 | 3.67 | 4 | 1.53 | 1.67 | 2.17 | 3 | 3.17 | 1.83 | 2.50 | 4 | 4.16 | 2.17 | 2.83 | 5 | 3.29 | 1.92 | 2.79 | 4 |
| P10909 | Clusterin | CLU | 14.92 | 5 | 52.5 | 6.27 | 2.58 | 1.17 | 2.17 | 6 | 4.42 | 1.33 | 3.17 | 5 | 4.16 | 2.00 | 3.33 | 6 | 4.19 | 1.33 | 2.33 | 6 | 3.84 | 1.46 | 2.75 | 4 |
| P20674 | Cytochrome c oxidase subunit 5A, mitochondrial | COX5A | 30.67 | 2 | 16.8 | 6.79 | 4.27 | 0.83 | 2.33 | 5 | 3.32 | 0.83 | 2.00 | 5 | 6.18 | 1.00 | 3.33 | 6 | 6.59 | 1.17 | 3.17 | 6 | 5.09 | 0.96 | 2.71 | 4 |
| G8JLB6 | Heterogeneous nuclear ribonucleoprotein H | HNRNPH1 | 9.32 | 1 | 51.2 | 6.80 | 4.31 | 1.17 | 2.50 | 5 | 3.59 | 1.50 | 2.67 | 6 | 5.09 | 1.33 | 2.83 | 6 | 4.58 | 1.33 | 2.83 | 6 | 4.39 | 1.33 | 2.71 | 4 |
| P62314 | Small nuclear ribonucleoprotein Sm D1 | SNRPD1 | 16.81 | 1 | 13.3 | 11.56 | 4.19 | 0.83 | 2.83 | 5 | 4.04 | 0.67 | 2.17 | 4 | 4.55 | 1.00 | 3.00 | 6 | 4.08 | 1.00 | 2.67 | 6 | 4.21 | 0.88 | 2.67 | 4 |
| A0A2U3TZU2 | Glucose-6-phosphate isomerase | GPI | 17.76 | 6 | 67.2 | 8.97 | 1.19 | 1.00 | 1.33 | 3 | 4.63 | 1.33 | 2.33 | 3 | 3.97 | 3.00 | 4.50 | 6 | 4.21 | 1.67 | 2.50 | 5 | 3.50 | 1.75 | 2.67 | 4 |
| P24821 | Tenascin | TNC | 2.59 | 3 | 240.7 | 4.89 | 3.92 | 1.83 | 2.83 | 6 | 3.67 | 1.50 | 2.83 | 5 | 3.50 | 1.17 | 1.83 | 4 | 3.13 | 1.83 | 3.17 | 6 | 3.55 | 1.58 | 2.67 | 4 |
| O95994 | Anterior gradient protein 2 homolog | AGR2 | 29.71 | 3 | 20.0 | 9.00 | 3.18 | 1.17 | 1.67 | 3 | 3.99 | 1.33 | 2.33 | 5 | 3.99 | 1.50 | 2.17 | 6 | 7.40 | 2.67 | 4.17 | 6 | 4.64 | 1.67 | 2.58 | 4 |
| P09110 | 3-ketoacyl-CoA thiolase, peroxisomal | ACAA1 | 9.43 | 3 | 44.3 | 8.44 | 2.73 | 1.00 | 1.83 | 4 | 6.84 | 1.33 | 3.50 | 4 | 3.46 | 1.17 | 2.33 | 6 | 4.13 | 1.00 | 2.67 | 6 | 4.29 | 1.13 | 2.58 | 4 |
| P22626 | Heterogeneous nuclear ribonucleoproteins A2/B1 | HNRNPA2B1 | 17.28 | 5 | 37.4 | 8.95 | 2.80 | 1.17 | 1.67 | 5 | 5.92 | 1.83 | 3.67 | 6 | 4.65 | 2.33 | 3.00 | 6 | 2.89 | 1.50 | 1.83 | 5 | 4.07 | 1.71 | 2.54 | 4 |
| Q9BXN1 | Asporin | ASPN | 4.74 | 2 | 43.4 | 7.08 | 5.31 | 1.33 | 2.67 | 6 | 5.24 | 1.00 | 2.17 | 6 | 2.66 | 1.00 | 2.50 | 6 | 5.22 | 1.00 | 2.83 | 6 | 4.61 | 1.08 | 2.54 | 4 |
| P11021 | Endoplasmic reticulum chaperone BiP | HSPA5 | 18.35 | 8 | 72.3 | 5.16 | 3.86 | 2.00 | 2.67 | 5 | 2.83 | 2.33 | 2.33 | 6 | 2.36 | 1.33 | 1.67 | 6 | 4.18 | 2.67 | 3.50 | 6 | 3.31 | 2.08 | 2.54 | 4 |
| P11217 | Glycogen phosphorylase, muscle form | PYGM | 18.17 | 9 | 97.0 | 7.03 | 3.58 | 2.33 | 3.33 | 4 | 3.86 | 1.67 | 2.33 | 2 | 2.32 | 1.17 | 1.67 | 2 | 2.81 | 1.67 | 2.67 | 3 | 3.14 | 1.71 | 2.50 | 4 |
| Q04695 | Keratin, type I cytoskeletal 17 | KRT17 | 12.96 | 2 | 48.1 | 5.02 | 2.09 | 1.00 | 1.67 | 4 | 1.49 | 1.33 | 2.00 | 4 | 3.72 | 1.83 | 3.17 | 5 | 2.60 | 2.00 | 3.17 | 6 | 2.47 | 1.54 | 2.50 | 4 |
| P21333 | Filamin-A | FLNA | 12.32 | 15 | 280.6 | 6.06 | 3.30 | 1.33 | 1.83 | 5 | 2.02 | 1.33 | 1.83 | 4 | 5.01 | 2.50 | 3.67 | 6 | 4.60 | 2.33 | 2.67 | 6 | 3.73 | 1.88 | 2.50 | 4 |
| P07355 | Annexin A2 | ANXA2 | 28.02 | 8 | 38.6 | 7.75 | 4.19 | 2.00 | 3.17 | 6 | 2.36 | 1.50 | 1.83 | 6 | 2.61 | 2.33 | 3.33 | 6 | 1.57 | 1.67 | 1.67 | 4 | 2.68 | 1.88 | 2.50 | 4 |
| Q9Y281 | Cofilin-2 | CFL2 | 28.92 | 1 | 18.7 | 7.88 | 3.66 | 1.33 | 1.83 | 6 | 5.04 | 1.33 | 2.83 | 6 | 4.60 | 1.17 | 2.83 | 6 | 3.60 | 1.00 | 2.33 | 6 | 4.22 | 1.21 | 2.46 | 4 |
| F5H423 | Uncharacterized protein |  | 34.76 | 5 | 23.3 | 8.60 | 3.63 | 2.50 | 2.83 | 5 | 2.48 | 1.50 | 2.17 | 4 | 1.56 | 1.67 | 2.00 | 5 | 2.99 | 1.67 | 2.83 | 5 | 2.67 | 1.83 | 2.46 | 4 |
| Q7KZF4 | Staphylococcal nuclease domain-containing protein 1 | SND1 | 9.12 | 4 | 101.9 | 7.17 | 4.04 | 1.33 | 2.00 | 4 | 5.43 | 1.50 | 2.67 | 5 | 6.33 | 2.17 | 3.17 | 6 | 3.72 | 1.67 | 1.83 | 6 | 4.88 | 1.67 | 2.42 | 4 |
| P60842 | Eukaryotic initiation factor 4A-I | EIF4A1 | 19.70 | 5 | 46.1 | 5.48 | 2.06 | 1.83 | 2.17 | 6 | 5.76 | 2.33 | 3.50 | 5 | 2.60 | 2.00 | 2.33 | 6 | 2.41 | 1.17 | 1.67 | 5 | 3.21 | 1.83 | 2.42 | 4 |
| O75369 | Filamin-B | FLNB | 4.34 | 5 | 278.0 | 5.73 | 1.72 | 0.67 | 0.83 | 4 | 4.67 | 0.83 | 2.83 | 4 | 6.54 | 1.33 | 3.17 | 6 | 5.25 | 1.17 | 2.50 | 6 | 4.54 | 1.00 | 2.33 | 4 |
| P26038 | Moesin | MSN | 6.93 | 2 | 67.8 | 6.40 | 2.62 | 1.33 | 1.83 | 6 | 3.06 | 0.83 | 2.50 | 4 | 4.25 | 1.33 | 3.33 | 6 | 2.47 | 0.83 | 1.67 | 5 | 3.10 | 1.08 | 2.33 | 4 |
| P14625 | Endoplasmin | HSP90B1 | 15.32 | 8 | 92.4 | 4.84 | 1.68 | 1.50 | 1.83 | 4 | 3.01 | 2.33 | 2.83 | 6 | 1.77 | 2.17 | 2.50 | 5 | 3.06 | 2.00 | 2.17 | 6 | 2.38 | 2.00 | 2.33 | 4 |
| P31146 | Coronin-1A | CORO1A | 10.63 | 2 | 51.0 | 6.68 | 7.31 | 1.17 | 2.67 | 6 | 5.74 | 1.17 | 2.17 | 5 | 5.95 | 1.33 | 2.33 | 6 | 4.18 | 1.50 | 2.00 | 6 | 5.80 | 1.29 | 2.29 | 4 |
| O14773 | Tripeptidyl-peptidase 1 | TPP1 | 7.28 | 2 | 61.2 | 6.48 | 2.56 | 0.83 | 1.17 | 5 | 5.50 | 0.67 | 2.17 | 3 | 5.38 | 1.00 | 2.17 | 6 | 9.85 | 1.00 | 3.50 | 6 | 5.82 | 0.88 | 2.25 | 4 |
| P63244 | Receptor of activated protein C kinase 1 | RACK1 | 19.24 | 4 | 35.1 | 7.69 | 2.20 | 1.67 | 2.67 | 5 | 4.73 | 1.17 | 2.50 | 4 | 4.18 | 1.50 | 2.50 | 6 | 0.68 | 1.17 | 1.33 | 3 | 2.95 | 1.38 | 2.25 | 4 |
| Q01105 | Protein SET | SET | 15.86 | 2 | 33.5 | 4.32 | 4.22 | 1.17 | 1.83 | 4 | 3.92 | 1.67 | 2.50 | 6 | 5.91 | 1.67 | 3.00 | 6 | 3.00 | 1.17 | 1.50 | 5 | 4.26 | 1.42 | 2.21 | 4 |
| P34931 | Heat shock 70 kDa protein 1-like | HSPA1L | 10.61 | 1 | 70.3 | 6.02 | 1.84 | 0.83 | 1.50 | 5 | 2.80 | 1.67 | 2.33 | 6 | 2.78 | 1.50 | 2.50 | 6 | 2.91 | 2.00 | 2.50 | 6 | 2.58 | 1.50 | 2.21 | 4 |
| Q08380 | Galectin-3-binding protein | LGALS3BP | 16.24 | 6 | 65.3 | 5.27 | 3.07 | 1.50 | 2.17 | 5 | 2.98 | 1.17 | 1.50 | 4 | 4.88 | 1.83 | 2.83 | 6 | 3.64 | 1.50 | 2.17 | 5 | 3.64 | 1.50 | 2.17 | 4 |
| P22314 | Ubiquitin-like modifier-activating enzyme 1 | UBA1 | 13.23 | 9 | 117.8 | 5.76 | 3.09 | 2.00 | 2.33 | 5 | 3.49 | 1.67 | 2.17 | 5 | 4.05 | 1.50 | 2.33 | 6 | 3.07 | 1.67 | 1.67 | 5 | 3.43 | 1.71 | 2.13 | 4 |
| P27348 | 14-3-3 protein theta | YWHAQ | 15.10 | 2 | 27.7 | 4.78 | 5.02 | 1.33 | 2.83 | 6 | 1.82 | 1.00 | 1.67 | 5 | 1.67 | 1.17 | 1.83 | 5 | 3.26 | 1.83 | 2.00 | 6 | 2.94 | 1.33 | 2.08 | 4 |
| P45378 | Troponin T, fast skeletal muscle | TNNT3 | 16.73 | 3 | 31.8 | 5.90 | 4.96 | 1.17 | 2.83 | 4 | 3.97 | 0.83 | 2.33 | 2 | 2.02 | 0.50 | 1.00 | 2 | 2.98 | 0.50 | 2.17 | 3 | 3.48 | 0.75 | 2.08 | 4 |
| P35749 | Myosin-11 | MYH11 | 4.92 | 2 | 227.2 | 5.50 | 3.83 | 1.67 | 2.33 | 5 | 2.69 | 1.17 | 1.50 | 5 | 3.33 | 1.67 | 2.33 | 6 | 3.82 | 1.50 | 2.17 | 6 | 3.42 | 1.50 | 2.08 | 4 |
| Q99536 | Synaptic vesicle membrane protein VAT-1 homolog | VAT1 | 4.58 | 1 | 41.9 | 6.29 | 2.09 | 0.83 | 1.50 | 5 | 2.51 | 0.67 | 1.67 | 4 | 3.49 | 1.00 | 2.50 | 6 | 2.87 | 1.00 | 2.50 | 6 | 2.74 | 0.88 | 2.04 | 4 |
| P53618 | Coatomer subunit beta | COPB1 | 5.35 | 3 | 107.1 | 6.05 | 1.32 | 0.83 | 1.33 | 3 | 3.91 | 1.33 | 2.17 | 4 | 4.19 | 1.67 | 2.83 | 5 | 2.82 | 1.17 | 1.83 | 5 | 3.06 | 1.25 | 2.04 | 4 |
| A6NIZ1 | Ras-related protein Rap-1b-like protein |  | 14.67 | 2 | 20.9 | 5.48 | 4.18 | 1.00 | 2.00 | 5 | 4.48 | 1.17 | 2.33 | 6 | 2.57 | 1.00 | 2.00 | 6 | 3.53 | 1.17 | 1.83 | 6 | 3.69 | 1.08 | 2.04 | 4 |
| A0A0C4DGQ5 | Calpain small subunit 1 | CAPNS1 | 14.91 | 3 | 33.8 | 6.23 | 1.49 | 0.83 | 1.67 | 5 | 2.97 | 0.83 | 1.83 | 4 | 2.44 | 1.17 | 2.17 | 5 | 3.65 | 1.17 | 2.50 | 5 | 2.64 | 1.00 | 2.04 | 4 |
| P12956 | X-ray repair cross-complementing protein 6 | XRCC6 | 9.69 | 3 | 69.8 | 6.64 | 0.88 | 0.67 | 0.83 | 2 | 4.16 | 1.17 | 2.67 | 4 | 3.33 | 1.50 | 2.83 | 6 | 1.89 | 1.17 | 1.67 | 4 | 2.57 | 1.13 | 2.00 | 4 |
| Q15582 | Transforming growth factor-beta-induced protein ig-h3 | TGFBI | 3.37 | 1 | 74.6 | 7.71 | 1.92 | 0.67 | 1.33 | 4 | 1.78 | 0.67 | 1.17 | 4 | 7.22 | 1.00 | 3.83 | 6 | 3.25 | 0.67 | 1.67 | 4 | 3.54 | 0.75 | 2.00 | 4 |
| P02585 | Troponin C, skeletal muscle | TNNC2 | 10.63 | 1 | 18.1 | 4.20 | 3.10 | 0.33 | 1.83 | 2 | 5.62 | 0.33 | 3.83 | 2 | 1.56 | 0.33 | 0.83 | 2 | 2.59 | 0.67 | 1.33 | 4 | 3.22 | 0.42 | 1.96 | 4 |
| Q15084 | Protein disulfide-isomerase A6 | PDIA6 | 8.86 | 2 | 48.1 | 5.08 | 1.23 | 0.33 | 0.50 | 2 | 1.74 | 0.67 | 1.83 | 4 | 3.12 | 0.83 | 3.00 | 5 | 2.90 | 1.17 | 2.50 | 6 | 2.25 | 0.75 | 1.96 | 4 |
| P02545 | Prelamin-A/C | LMNA | 17.92 | 9 | 74.1 | 7.02 | 2.45 | 1.00 | 1.83 | 5 | 2.29 | 1.00 | 1.50 | 4 | 2.85 | 2.00 | 2.50 | 5 | 3.03 | 1.50 | 2.00 | 6 | 2.65 | 1.38 | 1.96 | 4 |
| Q92743 | Serine protease HTRA1 | HTRA1 | 12.71 | 2 | 51.3 | 7.83 | 3.82 | 0.67 | 2.17 | 4 | 3.35 | 1.00 | 1.67 | 4 | 3.14 | 1.00 | 1.83 | 6 | 4.33 | 1.17 | 2.17 | 5 | 3.66 | 0.96 | 1.96 | 4 |
| A0A087X1Z3 | Proteasome activator complex subunit 2 | PSME2 | 14.96 | 2 | 29.1 | 6.71 | 2.72 | 1.17 | 1.83 | 5 | 2.15 | 0.83 | 1.83 | 3 | 4.39 | 1.33 | 2.50 | 6 | 2.22 | 1.17 | 1.67 | 4 | 2.87 | 1.13 | 1.96 | 4 |
| O00303 | Eukaryotic translation initiation factor 3 subunit F | EIF3F | 5.32 | 1 | 37.5 | 5.45 | 5.46 | 0.67 | 2.33 | 4 | 3.26 | 0.67 | 1.67 | 4 | 4.17 | 1.00 | 2.00 | 6 | 3.34 | 0.83 | 1.67 | 5 | 4.06 | 0.79 | 1.92 | 4 |
| P19338 | Nucleolin | NCL | 11.55 | 5 | 76.6 | 4.70 | 1.04 | 0.67 | 1.00 | 3 | 2.50 | 1.17 | 1.67 | 3 | 6.17 | 2.50 | 3.67 | 6 | 2.05 | 0.83 | 1.33 | 5 | 2.94 | 1.29 | 1.92 | 4 |
| P09651 | Heterogeneous nuclear ribonucleoprotein A1 | HNRNPA1 | 6.99 | 2 | 38.7 | 9.13 | 2.41 | 1.33 | 1.83 | 6 | 3.36 | 1.33 | 2.50 | 6 | 1.76 | 1.00 | 1.33 | 5 | 2.49 | 1.67 | 2.00 | 6 | 2.50 | 1.33 | 1.92 | 4 |
| A0A0U1RRM4 | Polypyrimidine tract-binding protein 1 | PTBP1 | 20.58 | 5 | 62.4 | 9.10 | 0.63 | 0.50 | 0.67 | 2 | 2.49 | 1.33 | 2.00 | 4 | 2.16 | 1.67 | 2.17 | 5 | 2.92 | 1.33 | 2.67 | 6 | 2.05 | 1.21 | 1.88 | 4 |
| P69905 | Hemoglobin subunit alpha | HBA1 | 25.35 | 3 | 15.2 | 8.68 | 4.34 | 1.33 | 2.50 | 6 | 3.51 | 0.83 | 1.50 | 5 | 3.11 | 1.00 | 1.67 | 6 | 2.59 | 0.83 | 1.83 | 5 | 3.39 | 1.00 | 1.88 | 4 |
| P35580 | Myosin-10 | MYH10 | 2.73 | 1 | 228.9 | 5.54 | 2.61 | 1.00 | 1.50 | 4 | 3.07 | 1.33 | 1.67 | 5 | 3.77 | 1.50 | 2.33 | 6 | 3.53 | 1.33 | 2.00 | 6 | 3.24 | 1.29 | 1.88 | 4 |
| P43490 | Nicotinamide phosphoribosyltransferase | NAMPT | 16.70 | 4 | 55.5 | 7.15 | 3.13 | 0.83 | 1.50 | 4 | 3.96 | 1.50 | 2.00 | 6 | 3.84 | 1.17 | 2.17 | 5 | 2.84 | 1.17 | 1.83 | 6 | 3.44 | 1.17 | 1.88 | 4 |
| J3KN67 | Tropomyosin alpha-3 chain | TPM3 | 19.65 | 1 | 33.2 | 4.77 | 2.60 | 1.17 | 1.83 | 5 | 2.04 | 1.50 | 2.17 | 3 | 1.77 | 1.00 | 1.50 | 3 | 2.82 | 1.00 | 1.50 | 2 | 2.31 | 1.17 | 1.75 | 4 |
| P13797 | Plastin-3 | PLS3 | 8.89 | 3 | 70.8 | 5.60 | 0.27 | 0.67 | 0.83 | 3 | 2.36 | 1.00 | 1.50 | 4 | 2.14 | 1.50 | 2.00 | 6 | 2.91 | 1.67 | 2.50 | 6 | 1.92 | 1.21 | 1.71 | 4 |
| A0A1C7CYX9 | Dihydropyrimidinase-related protein 2 | DPYSL2 | 11.23 | 3 | 73.5 | 6.35 | 2.84 | 1.00 | 1.67 | 4 | 3.32 | 0.50 | 1.50 | 3 | 3.31 | 1.00 | 2.00 | 5 | 2.79 | 1.00 | 1.50 | 5 | 3.06 | 0.88 | 1.67 | 4 |
| P31944 | Caspase-14 | CASP14 | 33.06 | 5 | 27.7 | 5.58 | 0.57 | 0.50 | 0.67 | 2 | 1.88 | 1.50 | 1.67 | 4 | 2.96 | 2.17 | 2.83 | 6 | 1.76 | 1.00 | 1.50 | 3 | 1.79 | 1.29 | 1.67 | 4 |
| A0A0G2JIW1 | Heat shock 70 kDa protein 1B | HSPA1B | 16.98 | 4 | 70.1 | 5.66 | 1.00 | 0.67 | 1.00 | 3 | 3.83 | 1.50 | 2.33 | 4 | 1.85 | 1.50 | 2.17 | 6 | 1.72 | 0.83 | 1.17 | 5 | 2.10 | 1.13 | 1.67 | 4 |
| P40763 | Sial transducer and activator of transcription 3 | STAT3 | 17.66 | 8 | 88.0 | 6.30 | 2.89 | 0.83 | 1.50 | 5 | 3.33 | 1.33 | 2.17 | 4 | 2.04 | 0.67 | 1.00 | 4 | 1.93 | 1.00 | 1.83 | 5 | 2.55 | 0.96 | 1.63 | 4 |
| K7ELC2 | 40S ribosomal protein S15 | RPS15 | 44.74 | 3 | 17.7 | 10.39 | 0.71 | 0.83 | 1.17 | 5 | 1.88 | 1.17 | 1.83 | 5 | 3.26 | 1.33 | 2.17 | 4 | 2.10 | 0.83 | 1.33 | 5 | 1.98 | 1.04 | 1.63 | 4 |
| P98095 | Fibulin-2 | FBLN2 | 3.21 | 2 | 126.5 | 4.82 | 3.12 | 0.83 | 1.33 | 5 | 3.95 | 1.17 | 1.83 | 4 | 2.85 | 1.17 | 1.83 | 5 | 3.19 | 0.50 | 1.50 | 3 | 3.28 | 0.92 | 1.63 | 4 |
| P46940 | Ras GTPase-activating-like protein IQGAP1 | IQGAP1 | 9.66 | 3 | 189.1 | 6.48 | 2.31 | 0.83 | 1.33 | 4 | 4.70 | 1.67 | 2.17 | 5 | 3.74 | 1.50 | 2.33 | 5 | 0.88 | 0.50 | 0.67 | 3 | 2.91 | 1.13 | 1.63 | 4 |
| Q9C005 | Protein dpy-30 homolog | DPY30 | 20.20 | 1 | 11.2 | 4.88 | 3.28 | 0.67 | 1.67 | 4 | 3.03 | 0.67 | 1.33 | 4 | 4.07 | 0.83 | 1.83 | 5 | 2.72 | 0.67 | 1.50 | 4 | 3.27 | 0.71 | 1.58 | 4 |
| Q8WUM4 | Programmed cell death 6-interacting protein | PDCD6IP | 7.14 | 3 | 96.0 | 6.52 | 1.11 | 0.67 | 0.67 | 4 | 2.54 | 1.17 | 1.50 | 4 | 3.36 | 1.50 | 2.17 | 6 | 2.85 | 1.67 | 2.00 | 5 | 2.47 | 1.25 | 1.58 | 4 |
| O00232 | 26S proteasome non-ATPase regulatory subunit 12 | PSMD12 | 7.89 | 2 | 52.9 | 7.65 | 2.44 | 0.83 | 1.50 | 4 | 4.04 | 0.83 | 1.67 | 4 | 4.99 | 1.00 | 2.33 | 6 | 1.70 | 0.67 | 0.83 | 4 | 3.29 | 0.83 | 1.58 | 4 |
| P11216 | Glycogen phosphorylase, brain form | PYGB | 11.74 | 4 | 96.6 | 6.86 | 3.36 | 1.50 | 2.67 | 5 | 2.42 | 1.00 | 1.33 | 3 | 1.76 | 0.50 | 0.83 | 3 | 2.02 | 1.00 | 1.50 | 4 | 2.39 | 1.00 | 1.58 | 4 |
| P78371 | T-complex protein 1 subunit beta | CCT2 | 28.60 | 8 | 57.5 | 6.46 | 1.73 | 1.17 | 1.50 | 4 | 1.93 | 1.50 | 1.83 | 4 | 1.33 | 1.50 | 1.67 | 4 | 1.24 | 1.17 | 1.17 | 6 | 1.56 | 1.33 | 1.54 | 4 |
| A0A2R8Y5V9 | Tropomyosin alpha-4 chain | TPM4 | 26.61 | 4 | 28.6 | 4.70 | 2.22 | 1.00 | 1.83 | 4 | 2.83 | 1.50 | 2.17 | 4 | 1.09 | 1.00 | 1.33 | 3 | 0.68 | 0.50 | 0.83 | 2 | 1.70 | 1.00 | 1.54 | 4 |
| P14543 | Nidogen-1 | NID1 | 1.04 | 1 | 136.3 | 5.29 | 2.58 | 0.83 | 1.50 | 5 | 1.49 | 1.00 | 1.33 | 6 | 2.23 | 1.00 | 1.50 | 6 | 1.80 | 1.00 | 1.83 | 6 | 2.02 | 0.96 | 1.54 | 4 |
| A8MXP9 | Matrin-3 | MATR3 | 7.37 | 3 | 99.9 | 6.04 | 1.04 | 1.00 | 1.83 | 5 | 1.55 | 0.67 | 1.17 | 3 | 2.26 | 0.83 | 1.33 | 4 | 2.22 | 1.00 | 1.83 | 6 | 1.77 | 0.88 | 1.54 | 4 |
| Q86VP6 | Cullin-associated NEDD8-dissociated protein 1 | CAND1 | 7.64 | 4 | 136.3 | 5.78 | 2.06 | 1.33 | 1.33 | 6 | 1.98 | 0.83 | 1.83 | 3 | 0.43 | 1.33 | 1.50 | 6 | 1.54 | 1.17 | 1.50 | 4 | 1.50 | 1.17 | 1.54 | 4 |
| P31946 | 14-3-3 protein beta/alpha | YWHAB | 15.04 | 2 | 28.1 | 4.83 | 3.67 | 0.83 | 1.83 | 4 | 2.26 | 0.67 | 1.17 | 4 | 3.03 | 0.67 | 1.50 | 3 | 3.71 | 1.17 | 1.67 | 5 | 3.17 | 0.83 | 1.54 | 4 |
| Q07065 | Cytoskeleton-associated protein 4 | CKAP4 | 2.66 | 1 | 66.0 | 5.92 | 3.20 | 0.67 | 1.67 | 4 | 2.25 | 0.83 | 1.17 | 5 | 3.62 | 1.00 | 2.00 | 6 | 1.83 | 0.83 | 1.17 | 5 | 2.72 | 0.83 | 1.50 | 4 |
| P18669 | Phosphoglycerate mutase 1 | PGAM1 | 37.40 | 5 | 28.8 | 7.18 | 0.79 | 0.83 | 1.33 | 4 | 2.07 | 1.33 | 1.50 | 4 | 2.08 | 1.67 | 2.00 | 6 | 0.56 | 0.83 | 1.17 | 4 | 1.37 | 1.17 | 1.50 | 4 |
| P98179 | RNA-binding protein 3 | RBM3 | 20.38 | 1 | 17.2 | 8.91 | 3.39 | 0.67 | 1.33 | 4 | 2.86 | 0.67 | 1.17 | 4 | 3.93 | 1.00 | 1.83 | 6 | 3.32 | 0.83 | 1.67 | 5 | 3.37 | 0.79 | 1.50 | 4 |
| P08133 | Annexin A6 | ANXA6 | 15.30 | 6 | 75.8 | 5.60 | 3.46 | 1.17 | 1.67 | 6 | 4.06 | 1.50 | 2.17 | 4 | 1.61 | 0.83 | 1.00 | 5 | 1.38 | 1.17 | 1.17 | 5 | 2.63 | 1.17 | 1.50 | 4 |
| P05387 | 60S acidic ribosomal protein P2 | RPLP2 | 26.96 | 2 | 11.7 | 4.54 | 1.10 | 0.67 | 1.00 | 4 | 1.50 | 1.17 | 1.67 | 5 | 2.76 | 1.00 | 2.17 | 5 | 1.36 | 0.83 | 1.17 | 5 | 1.68 | 0.92 | 1.50 | 4 |
| P04843 | Dolichyl-diphosphooligosaccharide--protein glycosyltransferase subunit 1 | RPN1 | 17.63 | 5 | 68.5 | 6.38 | 2.11 | 1.17 | 1.50 | 3 | 1.19 | 1.17 | 1.33 | 4 | 1.70 | 1.33 | 1.50 | 6 | 2.55 | 1.17 | 1.50 | 5 | 1.89 | 1.21 | 1.46 | 4 |
| P27797 | Calreticulin | CALR | 21.34 | 4 | 48.1 | 4.44 | 2.33 | 0.67 | 1.17 | 4 | 1.47 | 0.67 | 0.67 | 2 | 3.26 | 2.00 | 2.33 | 6 | 2.72 | 1.00 | 1.67 | 5 | 2.45 | 1.08 | 1.46 | 4 |
| P30101 | Protein disulfide-isomerase A3 | PDIA3 | 13.47 | 4 | 56.7 | 6.35 | 0.74 | 0.67 | 0.83 | 3 | 3.37 | 1.00 | 1.50 | 4 | 3.24 | 1.33 | 1.83 | 6 | 3.79 | 1.17 | 1.67 | 5 | 2.79 | 1.04 | 1.46 | 4 |
| P61158 | Actin-related protein 3 | ACTR3 | 10.77 | 3 | 47.3 | 5.88 | 1.51 | 0.83 | 1.17 | 3 | 2.54 | 1.00 | 1.50 | 4 | 1.48 | 1.17 | 1.33 | 5 | 1.70 | 1.33 | 1.67 | 6 | 1.81 | 1.08 | 1.42 | 4 |
| P04844 | Dolichyl-diphosphooligosaccharide--protein glycosyltransferase subunit 2 | RPN2 | 11.73 | 4 | 69.2 | 5.69 | 0.64 | 0.83 | 1.00 | 3 | 1.42 | 1.17 | 1.33 | 4 | 2.25 | 1.17 | 1.50 | 3 | 2.12 | 1.33 | 1.83 | 6 | 1.61 | 1.13 | 1.42 | 4 |
| A0A0J9YXZ5 | Ras GTPase-activating-like protein IQGAP1 | IQGAP1 | 9.66 | 1 | 135.9 | 6.14 | 2.31 | 0.83 | 1.33 | 4 | 3.94 | 1.33 | 1.83 | 5 | 2.96 | 1.17 | 2.00 | 5 | 0.60 | 0.33 | 0.50 | 2 | 2.45 | 0.92 | 1.42 | 4 |
| P62937 | Peptidyl-prolyl cis-trans isomerase A | PPIA | 22.42 | 4 | 18.0 | 7.81 | 1.32 | 1.17 | 1.33 | 4 | 1.75 | 1.67 | 2.17 | 5 | 1.17 | 1.00 | 1.17 | 4 | 0.60 | 1.00 | 1.00 | 3 | 1.21 | 1.21 | 1.42 | 4 |
| P12532 | Creatine kinase U-type, mitochondrial | CKMT1A | 6.24 | 1 | 47.0 | 8.34 | 0.34 | 0.33 | 0.33 | 2 | 2.49 | 0.67 | 1.50 | 4 | 2.64 | 0.50 | 1.17 | 3 | 3.22 | 1.00 | 2.67 | 6 | 2.17 | 0.63 | 1.42 | 4 |
| P24752 | Acetyl-CoA acetyltransferase, mitochondrial | ACAT1 | 10.30 | 2 | 45.2 | 8.85 | 0.66 | 0.50 | 0.67 | 2 | 2.67 | 0.83 | 1.50 | 4 | 0.88 | 1.00 | 1.33 | 4 | 3.02 | 1.17 | 2.00 | 6 | 1.80 | 0.88 | 1.38 | 4 |
| Q92597 | Protein NDRG1 | NDRG1 | 4.82 | 1 | 42.8 | 5.82 | 1.89 | 0.67 | 1.33 | 4 | 1.43 | 0.67 | 1.50 | 4 | 1.97 | 0.50 | 1.00 | 3 | 2.46 | 0.67 | 1.67 | 4 | 1.94 | 0.63 | 1.38 | 4 |
| Q08211 | ATP-dependent RNA helicase A | DHX9 | 3.62 | 3 | 140.9 | 6.84 | 0.60 | 0.83 | 1.00 | 5 | 1.23 | 0.67 | 1.00 | 3 | 1.58 | 1.00 | 1.33 | 5 | 3.00 | 1.17 | 2.17 | 5 | 1.60 | 0.92 | 1.38 | 4 |
| P23396 | 40S ribosomal protein S3 | RPS3 | 22.22 | 2 | 26.7 | 9.66 | 1.58 | 1.33 | 1.33 | 5 | 2.27 | 1.17 | 1.67 | 4 | 1.29 | 1.50 | 2.00 | 4 | 0.30 | 0.33 | 0.33 | 2 | 1.36 | 1.08 | 1.33 | 4 |
| A2A274 | Aconitate hydratase, mitochondrial | ACO2 | 10.06 | 4 | 87.8 | 7.37 | 2.11 | 0.83 | 1.50 | 4 | 2.66 | 1.33 | 2.33 | 5 | 0.34 | 0.50 | 0.50 | 2 | 0.71 | 0.67 | 1.00 | 3 | 1.45 | 0.83 | 1.33 | 4 |
| P20618 | Proteasome subunit beta type-1 | PSMB1 | 23.24 | 3 | 26.5 | 8.13 | 1.56 | 0.83 | 1.00 | 3 | 1.01 | 1.00 | 1.50 | 4 | 1.86 | 1.17 | 2.17 | 6 | 0.39 | 0.33 | 0.50 | 2 | 1.20 | 0.83 | 1.29 | 4 |
| H0YBG6 | Stress-70 protein, mitochondrial (Fragment) | HSPA9 | 16.56 | 1 | 18.3 | 9.76 | 1.87 | 0.83 | 1.00 | 5 | 2.32 | 0.83 | 1.50 | 5 | 2.11 | 1.00 | 1.50 | 6 | 2.26 | 0.67 | 1.17 | 4 | 2.14 | 0.83 | 1.29 | 4 |
| A0A0A0MTS7 | Titin | TTN | 0.74 | 16 | #### | 6.39 | 4.33 | 2.33 | 3.33 | 4 | 2.01 | 1.50 | 1.50 | 3 | 0.30 | 0.17 | 0.17 | 1 | 0.27 | 0.17 | 0.17 | 1 | 1.73 | 1.04 | 1.29 | 4 |
| Q16630 | Cleavage and polyadenylation specificity factor subunit 6 | CPSF6 | 4.54 | 1 | 59.2 | 7.15 | 1.12 | 0.50 | 0.50 | 3 | 3.00 | 0.67 | 1.67 | 4 | 4.71 | 1.00 | 2.17 | 6 | 1.82 | 0.50 | 0.83 | 3 | 2.66 | 0.67 | 1.29 | 4 |
| E7EUC7 | UTP--glucose-1-phosphate uridylyltransferase | UGP2 | 12.19 | 3 | 57.8 | 8.13 | 2.39 | 0.67 | 1.17 | 3 | 1.83 | 0.50 | 0.83 | 3 | 1.76 | 0.67 | 1.00 | 4 | 2.51 | 1.17 | 2.00 | 4 | 2.12 | 0.75 | 1.25 | 4 |
| P35606 | Coatomer subunit beta' | COPB2 | 10.26 | 5 | 102.4 | 5.27 | 1.37 | 0.33 | 0.67 | 2 | 1.24 | 1.00 | 1.17 | 5 | 0.00 | 1.00 | 1.33 | 6 | 2.26 | 1.67 | 1.83 | 6 | 1.22 | 1.00 | 1.25 | 4 |
| A0A1B0GU03 | Uncharacterized protein |  | 8.25 | 3 | 62.7 | 7.77 | 1.21 | 0.50 | 0.83 | 3 | 0.98 | 0.83 | 1.00 | 4 | 2.05 | 0.83 | 2.00 | 4 | 0.86 | 0.83 | 1.00 | 4 | 1.27 | 0.75 | 1.21 | 4 |
| P50454 | Serpin H1 | SERPINH1 | 18.42 | 5 | 46.4 | 8.69 | 0.94 | 0.83 | 0.83 | 5 | 1.19 | 1.17 | 1.17 | 4 | 0.70 | 1.17 | 1.17 | 6 | 1.10 | 1.33 | 1.67 | 4 | 0.98 | 1.13 | 1.21 | 4 |
| Q00839 | Heterogeneous nuclear ribonucleoprotein U | HNRNPU | 4.97 | 2 | 90.5 | 6.00 | 2.00 | 0.83 | 1.00 | 4 | 1.93 | 0.83 | 0.83 | 4 | 4.91 | 1.17 | 1.83 | 6 | 2.79 | 0.67 | 1.17 | 4 | 2.91 | 0.88 | 1.21 | 4 |
| Q14204 | Cytoplasmic dynein 1 heavy chain 1 | DYNC1H1 | 4.30 | 10 | 532.1 | 6.40 | 0.90 | 0.83 | 1.00 | 4 | 0.91 | 1.00 | 1.00 | 3 | 0.29 | 0.83 | 1.00 | 3 | 2.28 | 1.50 | 1.83 | 6 | 1.09 | 1.04 | 1.21 | 4 |
| Q13268 | Dehydrogenase/reductase SDR family member 2, mitochondrial | DHRS2 | 30.36 | 5 | 29.9 | 9.01 | 0.64 | 0.33 | 0.50 | 1 | 3.26 | 1.17 | 1.67 | 4 | 1.06 | 1.33 | 1.50 | 5 | 1.45 | 0.67 | 1.17 | 4 | 1.60 | 0.88 | 1.21 | 4 |
| F8W0W8 | Serine/threonine-protein phosphatase | PPP1CC | 7.83 | 2 | 38.2 | 6.83 | 3.42 | 1.00 | 1.83 | 4 | 2.47 | 1.00 | 1.33 | 4 | 1.71 | 0.83 | 1.00 | 5 | 1.09 | 0.50 | 0.67 | 3 | 2.17 | 0.83 | 1.21 | 4 |
| P31415 | Calsequestrin-1 | CASQ1 | 17.93 | 5 | 45.1 | 4.16 | 1.18 | 1.17 | 1.50 | 3 | 0.75 | 0.50 | 0.67 | 3 | 0.75 | 0.50 | 0.50 | 2 | 2.48 | 1.50 | 2.00 | 4 | 1.29 | 0.92 | 1.17 | 4 |
| P04264 | Keratin, type II cytoskeletal 1 | KRT1 | 12.42 | 7 | 66.0 | 8.12 | 0.64 | 0.33 | 0.33 | 2 | 0.64 | 0.50 | 0.67 | 2 | 6.57 | 2.33 | 3.33 | 4 | 0.54 | 0.33 | 0.33 | 2 | 2.10 | 0.88 | 1.17 | 4 |
| P78527 | DNA-dependent protein kinase catalytic subunit | PRKDC | 1.87 | 4 | 468.8 | 7.12 | 0.58 | 0.50 | 0.50 | 3 | 2.88 | 0.83 | 1.50 | 4 | 2.45 | 0.83 | 1.33 | 4 | 1.90 | 0.83 | 1.33 | 4 | 1.95 | 0.75 | 1.17 | 4 |
| P05386 | 60S acidic ribosomal protein P1 | RPLP1 | 14.04 | 1 | 11.5 | 4.32 | 0.00 | 0.17 | 0.33 | 1 | 2.34 | 0.83 | 1.50 | 5 | 2.69 | 1.00 | 1.33 | 6 | 2.18 | 0.83 | 1.33 | 5 | 1.80 | 0.71 | 1.13 | 4 |
| Q99623 | Prohibitin-2 | PHB2 | 20.74 | 3 | 33.3 | 9.83 | 0.64 | 0.83 | 1.17 | 3 | 2.98 | 1.17 | 1.83 | 3 | 1.40 | 0.67 | 1.00 | 3 | 1.07 | 0.50 | 0.50 | 3 | 1.52 | 0.79 | 1.13 | 4 |
| P61981 | 14-3-3 protein gamma | YWHAG | 20.65 | 3 | 28.3 | 4.89 | 3.12 | 1.00 | 1.67 | 3 | 2.44 | 0.83 | 1.33 | 3 | 0.29 | 0.33 | 0.50 | 2 | 1.37 | 1.00 | 1.00 | 5 | 1.80 | 0.79 | 1.13 | 4 |
| P05109 | Protein S100-A8 | S100A8 | 34.41 | 2 | 10.8 | 7.03 | 0.95 | 0.83 | 1.17 | 3 | 1.54 | 1.17 | 1.83 | 4 | 0.00 | 0.83 | 1.00 | 5 | 0.34 | 0.33 | 0.50 | 2 | 0.71 | 0.79 | 1.13 | 4 |
| Q04760 | Lactoylglutathione lyase | GLO1 | 10.87 | 1 | 20.8 | 5.31 | 1.42 | 0.50 | 0.67 | 3 | 1.73 | 0.67 | 1.33 | 4 | 2.82 | 0.67 | 1.50 | 4 | 1.71 | 0.83 | 1.00 | 5 | 1.92 | 0.67 | 1.13 | 4 |
| I3L504 | Eukaryotic translation initiation factor 5A-1 | EIF5A | 19.35 | 2 | 20.5 | 5.25 | 0.27 | 0.50 | 0.67 | 2 | 0.56 | 0.83 | 1.00 | 3 | 1.25 | 1.00 | 1.33 | 5 | 1.48 | 0.83 | 1.33 | 5 | 0.89 | 0.79 | 1.08 | 4 |
| O00487 | 26S proteasome non-ATPase regulatory subunit 14 | PSMD14 | 10.97 | 1 | 34.6 | 6.52 | 2.02 | 0.67 | 0.83 | 4 | 1.08 | 0.67 | 0.83 | 4 | 3.83 | 1.00 | 1.50 | 6 | 2.39 | 0.83 | 1.17 | 5 | 2.33 | 0.79 | 1.08 | 4 |
| Q15056 | Eukaryotic translation initiation factor 4H | EIF4H | 11.69 | 1 | 27.4 | 7.23 | 1.16 | 0.33 | 0.67 | 2 | 1.20 | 0.67 | 1.33 | 4 | 1.39 | 0.83 | 1.17 | 5 | 1.98 | 0.83 | 1.17 | 5 | 1.43 | 0.67 | 1.08 | 4 |
| P55263 | Adenosine kinase | ADK | 16.85 | 3 | 40.5 | 6.70 | 0.00 | 0.50 | 0.67 | 3 | 1.11 | 0.50 | 1.33 | 3 | 1.88 | 1.00 | 1.33 | 4 | 0.68 | 0.83 | 0.83 | 5 | 0.92 | 0.71 | 1.04 | 4 |
| Q5T9B7 | Adenylate kinase isoenzyme 1 | AK1 | 12.86 | 2 | 23.4 | 8.60 | 1.19 | 0.67 | 0.83 | 4 | 0.95 | 0.67 | 0.83 | 3 | 1.76 | 0.83 | 1.17 | 4 | 0.92 | 0.83 | 1.33 | 3 | 1.21 | 0.75 | 1.04 | 4 |
| H3BNC9 | Uncharacterized protein |  | 3.77 | 1 | 64.5 | 8.78 | 1.28 | 0.50 | 0.67 | 3 | 1.62 | 0.50 | 0.83 | 3 | 2.17 | 0.83 | 1.67 | 5 | 1.34 | 0.50 | 1.00 | 3 | 1.60 | 0.58 | 1.04 | 4 |
| P17655 | Calpain-2 catalytic subunit | CAPN2 | 7.43 | 3 | 79.9 | 4.98 | 0.96 | 0.50 | 0.67 | 2 | 2.39 | 1.17 | 1.50 | 5 | 1.92 | 1.00 | 1.33 | 3 | 0.95 | 0.67 | 0.67 | 4 | 1.56 | 0.83 | 1.04 | 4 |
| P26640 | Valine--tRNA ligase | VARS | 4.91 | 3 | 140.4 | 7.59 | 1.52 | 0.67 | 1.00 | 4 | 0.93 | 1.00 | 1.83 | 3 | 0.95 | 0.67 | 0.67 | 3 | 1.18 | 0.50 | 0.67 | 3 | 1.14 | 0.71 | 1.04 | 4 |
| Q9Y678 | Coatomer subunit gamma-1 | COPG1 | 6.29 | 2 | 97.7 | 5.47 | 1.07 | 0.83 | 1.17 | 4 | 0.34 | 0.33 | 0.33 | 2 | 1.01 | 0.83 | 1.00 | 4 | 2.52 | 1.33 | 1.67 | 5 | 1.23 | 0.83 | 1.04 | 4 |
| O60888 | Protein CutA | CUTA | 15.08 | 1 | 19.1 | 5.50 | 1.01 | 0.33 | 0.33 | 2 | 1.45 | 0.67 | 1.17 | 4 | 1.40 | 0.83 | 1.17 | 5 | 3.18 | 0.83 | 1.50 | 5 | 1.76 | 0.67 | 1.04 | 4 |
| Q13510 | Acid ceramidase | ASAH1 | 20.00 | 4 | 44.6 | 7.62 | 2.15 | 0.67 | 1.17 | 4 | 2.28 | 1.00 | 1.50 | 4 | 1.99 | 0.83 | 1.17 | 4 | 0.58 | 0.33 | 0.33 | 2 | 1.75 | 0.71 | 1.04 | 4 |
| E9PGN7 | Plasma protease C1 inhibitor | SERPING1 | 3.13 | 1 | 59.5 | 6.76 | 3.31 | 0.67 | 1.67 | 4 | 2.85 | 0.67 | 1.50 | 4 | 0.00 | 0.33 | 0.33 | 2 | 1.12 | 0.33 | 0.67 | 2 | 1.82 | 0.50 | 1.04 | 4 |
| Q5JWF2 | Guanine nucleotide-binding protein G(s) subunit alpha isoforms XLas | GNAS | 4.92 | 2 | 111.0 | 5.03 | 0.81 | 0.33 | 0.33 | 2 | 0.81 | 0.67 | 0.83 | 4 | 0.86 | 1.00 | 1.33 | 5 | 1.51 | 1.00 | 1.50 | 6 | 1.00 | 0.75 | 1.00 | 4 |
| P60228 | Eukaryotic translation initiation factor 3 subunit E | EIF3E | 8.31 | 2 | 52.2 | 6.04 | 1.07 | 0.67 | 0.83 | 3 | 1.99 | 0.83 | 1.00 | 3 | 2.95 | 1.00 | 1.33 | 4 | 1.46 | 0.50 | 0.67 | 3 | 1.87 | 0.75 | 0.96 | 4 |
| P98160 | Basement membrane-specific heparan sulfate proteoglycan core protein | HSPG2 | 1.32 | 4 | 468.5 | 6.51 | 1.03 | 0.83 | 0.83 | 3 | 0.00 | 0.17 | 0.17 | 1 | 1.01 | 1.17 | 1.50 | 5 | 1.57 | 1.00 | 1.33 | 5 | 0.90 | 0.79 | 0.96 | 4 |
| Q15363 | Transmembrane emp24 domain-containing protein 2 | TMED2 | 20.40 | 2 | 22.7 | 5.17 | 1.80 | 0.33 | 0.67 | 2 | 0.98 | 0.67 | 0.67 | 3 | 2.14 | 1.00 | 1.33 | 4 | 2.00 | 1.00 | 1.17 | 4 | 1.73 | 0.75 | 0.96 | 4 |
| Q13492 | Phosphatidylinositol-binding clathrin assembly protein | PICALM | 9.05 | 3 | 70.7 | 7.90 | 0.00 | 0.50 | 0.67 | 3 | 0.38 | 0.50 | 0.67 | 3 | 2.07 | 0.83 | 1.33 | 3 | 0.70 | 0.83 | 1.17 | 5 | 0.79 | 0.67 | 0.96 | 4 |
| Q15181 | Inorganic pyrophosphatase | PPA1 | 5.54 | 1 | 32.6 | 5.86 | 1.54 | 0.50 | 0.83 | 3 | 0.95 | 0.50 | 0.83 | 3 | 1.72 | 1.00 | 1.50 | 6 | 0.84 | 0.33 | 0.50 | 2 | 1.26 | 0.58 | 0.92 | 4 |
| O75462 | Cytokine receptor-like factor 1 | CRLF1 | 4.03 | 1 | 46.3 | 9.11 | 1.97 | 0.67 | 1.17 | 4 | 0.33 | 0.17 | 0.17 | 1 | 1.08 | 0.50 | 0.67 | 3 | 2.98 | 1.00 | 1.67 | 6 | 1.59 | 0.58 | 0.92 | 4 |
| M0QXB4 | Coatomer protein complex, subunit epsilon, isoform CRA_g | COPE | 15.41 | 3 | 36.9 | 5.16 | 0.40 | 0.17 | 0.17 | 1 | 1.54 | 0.50 | 1.17 | 2 | 1.84 | 1.00 | 1.17 | 6 | 1.08 | 0.67 | 1.17 | 3 | 1.21 | 0.58 | 0.92 | 4 |
| P62258 | 14-3-3 protein epsilon | YWHAE | 14.51 | 2 | 29.2 | 4.74 | 2.21 | 1.00 | 1.67 | 4 | 0.78 | 0.50 | 0.67 | 3 | 0.67 | 0.50 | 0.83 | 2 | 0.75 | 0.50 | 0.50 | 3 | 1.10 | 0.63 | 0.92 | 4 |
| Q99714 | 3-hydroxyacyl-CoA dehydrogenase type-2 | HSD17B10 | 37.16 | 5 | 26.9 | 7.78 | 2.09 | 0.33 | 0.67 | 2 | 2.29 | 0.67 | 0.83 | 3 | 2.80 | 0.83 | 1.00 | 4 | 1.93 | 1.00 | 1.17 | 4 | 2.28 | 0.71 | 0.92 | 4 |
| P30041 | Peroxiredoxin-6 | PRDX6 | 27.68 | 4 | 25.0 | 6.38 | 0.00 | 0.17 | 0.17 | 1 | 0.35 | 0.67 | 0.67 | 3 | 1.27 | 1.17 | 1.67 | 5 | 0.63 | 0.83 | 1.17 | 4 | 0.56 | 0.71 | 0.92 | 4 |
| O43852 | Calumenin | CALU | 12.70 | 2 | 37.1 | 4.64 | 0.91 | 0.33 | 0.33 | 2 | 3.15 | 0.83 | 1.17 | 5 | 3.52 | 0.67 | 1.17 | 4 | 1.80 | 1.00 | 1.00 | 5 | 2.34 | 0.71 | 0.92 | 4 |
| P04083 | Annexin A1 | ANXA1 | 8.38 | 2 | 38.7 | 7.02 | 1.15 | 1.17 | 1.33 | 5 | 0.65 | 0.50 | 0.50 | 3 | 0.86 | 0.50 | 0.67 | 3 | 1.48 | 0.83 | 1.00 | 4 | 1.03 | 0.75 | 0.88 | 4 |
| A0A087WXS0 | Troponin I, fast skeletal muscle | TNNI2 | 9.34 | 2 | 21.3 | 9.09 | 0.00 | 0.33 | 0.67 | 2 | 0.92 | 0.67 | 0.67 | 2 | 1.72 | 0.50 | 1.00 | 2 | 0.28 | 0.67 | 1.17 | 3 | 0.73 | 0.54 | 0.88 | 4 |
| P45880 | Voltage-dependent anion-selective channel protein 2 | VDAC2 | 14.63 | 3 | 31.5 | 7.56 | 1.88 | 0.67 | 1.33 | 3 | 1.48 | 0.33 | 1.17 | 2 | 0.27 | 0.33 | 0.33 | 1 | 0.73 | 0.50 | 0.67 | 3 | 1.09 | 0.46 | 0.88 | 4 |
| P52566 | Rho GDP-dissociation inhibitor 2 | ARHGDIB | 12.94 | 1 | 23.0 | 5.21 | 1.47 | 0.83 | 1.33 | 5 | 0.45 | 0.67 | 0.67 | 4 | 0.86 | 0.83 | 1.00 | 5 | 0.44 | 0.33 | 0.50 | 2 | 0.81 | 0.67 | 0.88 | 4 |
| P17987 | T-complex protein 1 subunit alpha | TCP1 | 10.97 | 2 | 60.3 | 6.11 | 1.15 | 0.50 | 0.83 | 2 | 1.63 | 0.67 | 0.83 | 4 | 1.96 | 0.67 | 0.83 | 3 | 1.65 | 0.67 | 1.00 | 4 | 1.60 | 0.63 | 0.88 | 4 |
| A0A087WUZ3 | Spectrin beta chain | SPTBN1 | 4.90 | 7 | 274.7 | 5.57 | 2.16 | 1.17 | 1.17 | 3 | 0.78 | 0.83 | 0.83 | 3 | 0.53 | 0.33 | 0.33 | 2 | 1.41 | 1.00 | 1.17 | 5 | 1.22 | 0.83 | 0.88 | 4 |
| P48643 | T-complex protein 1 subunit epsilon | CCT5 | 16.08 | 4 | 59.6 | 5.66 | 1.44 | 0.83 | 1.00 | 4 | 1.68 | 1.00 | 1.00 | 5 | 1.20 | 0.50 | 0.67 | 2 | 0.86 | 0.50 | 0.83 | 3 | 1.30 | 0.71 | 0.88 | 4 |
| Q9ULV4 | Coronin-1C | CORO1C | 13.71 | 3 | 53.2 | 7.08 | 0.35 | 1.00 | 1.17 | 5 | 0.40 | 0.50 | 0.50 | 3 | 0.78 | 1.00 | 1.00 | 4 | 1.95 | 0.83 | 0.83 | 5 | 0.87 | 0.83 | 0.88 | 4 |
| P62701 | 40S ribosomal protein S4, X isoform | RPS4X | 14.83 | 3 | 29.6 | 10.15 | 0.88 | 0.67 | 0.67 | 2 | 1.79 | 1.17 | 1.33 | 5 | 0.90 | 0.67 | 0.67 | 4 | 1.22 | 0.50 | 0.83 | 3 | 1.20 | 0.75 | 0.88 | 4 |
| Q14019 | Coactosin-like protein | COTL1 | 11.27 | 1 | 15.9 | 5.67 | 1.68 | 0.83 | 1.00 | 5 | 1.31 | 0.50 | 0.67 | 3 | 2.35 | 0.83 | 1.33 | 5 | 0.32 | 0.17 | 0.33 | 1 | 1.41 | 0.58 | 0.83 | 4 |
| Q9NR31 | GTP-binding protein SAR1a | SAR1A | 11.62 | 1 | 22.4 | 6.68 | 1.71 | 0.50 | 1.00 | 3 | 1.53 | 0.50 | 1.00 | 3 | 0.68 | 0.33 | 0.67 | 2 | 0.94 | 0.50 | 0.67 | 3 | 1.21 | 0.46 | 0.83 | 4 |
| P17661 | Desmin | DES | 8.09 | 2 | 53.5 | 5.27 | 1.68 | 0.50 | 1.00 | 3 | 1.29 | 0.50 | 0.83 | 2 | 0.42 | 0.33 | 0.67 | 2 | 0.82 | 0.50 | 0.83 | 3 | 1.05 | 0.46 | 0.83 | 4 |
| Q13310 | Polyadenylate-binding protein 4 | PABPC4 | 3.73 | 1 | 70.7 | 9.26 | 0.37 | 0.33 | 0.33 | 2 | 1.26 | 0.67 | 1.00 | 4 | 0.75 | 0.83 | 1.00 | 5 | 0.72 | 0.83 | 1.00 | 5 | 0.77 | 0.67 | 0.83 | 4 |
| O95747 | Serine/threonine-protein kinase OSR1 | OXSR1 | 4.17 | 1 | 58.0 | 6.43 | 0.35 | 0.33 | 0.50 | 2 | 0.50 | 0.33 | 0.33 | 2 | 2.69 | 1.00 | 1.83 | 6 | 0.38 | 0.50 | 0.67 | 3 | 0.98 | 0.54 | 0.83 | 4 |
| A0A2R8Y5Y7 | 60S ribosomal protein L9 | RPL9 | 22.27 | 2 | 25.0 | 9.74 | 0.83 | 0.50 | 0.50 | 3 | 2.42 | 0.67 | 1.33 | 4 | 1.44 | 0.33 | 0.67 | 2 | 1.35 | 0.67 | 0.67 | 3 | 1.51 | 0.54 | 0.79 | 4 |
| A0A0D9SGF6 | Spectrin alpha chain, non-erythrocytic 1 | SPTAN1 | 5.32 | 6 | 287.4 | 5.36 | 1.66 | 1.00 | 1.00 | 4 | 1.53 | 0.67 | 0.83 | 4 | 1.34 | 0.67 | 0.67 | 4 | 1.35 | 0.67 | 0.67 | 4 | 1.47 | 0.75 | 0.79 | 4 |
| P60953 | Cell division control protein 42 homolog | CDC42 | 19.90 | 3 | 21.2 | 6.55 | 0.30 | 0.67 | 0.83 | 4 | 0.31 | 0.50 | 0.50 | 2 | 0.62 | 1.00 | 1.00 | 5 | 0.61 | 0.67 | 0.83 | 3 | 0.46 | 0.71 | 0.79 | 4 |
| P35221 | Catenin alpha-1 | CTNNA1 | 6.07 | 2 | 100.0 | 6.29 | 0.00 | 0.33 | 0.33 | 2 | 1.66 | 0.67 | 1.00 | 3 | 1.64 | 0.67 | 1.17 | 3 | 0.98 | 0.33 | 0.67 | 2 | 1.07 | 0.50 | 0.79 | 4 |
| Q99832 | T-complex protein 1 subunit eta | CCT7 | 11.42 | 3 | 59.3 | 7.65 | 1.14 | 0.50 | 0.67 | 2 | 2.36 | 1.00 | 1.50 | 3 | 1.02 | 0.50 | 0.50 | 2 | 0.34 | 0.33 | 0.50 | 2 | 1.22 | 0.58 | 0.79 | 4 |
| P22352 | Glutathione peroxidase 3 | GPX3 | 7.52 | 1 | 25.5 | 8.13 | 1.37 | 0.67 | 1.50 | 4 | 0.65 | 0.33 | 0.50 | 2 | 0.56 | 0.33 | 0.33 | 2 | 1.65 | 0.67 | 0.83 | 4 | 1.06 | 0.50 | 0.79 | 4 |
| J3KQE5 | GTP-binding nuclear protein Ran (Fragment) | RAN | 13.68 | 2 | 26.8 | 9.58 | 0.00 | 0.50 | 0.50 | 3 | 0.74 | 0.67 | 1.17 | 3 | 0.00 | 1.00 | 1.00 | 5 | 0.00 | 0.50 | 0.50 | 2 | 0.19 | 0.67 | 0.79 | 4 |
| P04179 | Superoxide dismutase [Mn], mitochondrial | SOD2 | 6.31 | 1 | 24.7 | 8.25 | 0.00 | 0.33 | 0.50 | 2 | 1.50 | 1.00 | 1.50 | 6 | 1.68 | 0.67 | 1.00 | 4 | 0.00 | 0.17 | 0.17 | 1 | 0.80 | 0.54 | 0.79 | 4 |
| P09622 | Dihydrolipoyl dehydrogenase, mitochondrial | DLD | 3.73 | 1 | 54.1 | 7.85 | 0.85 | 0.17 | 0.33 | 1 | 0.39 | 0.17 | 0.33 | 1 | 1.55 | 0.50 | 0.83 | 3 | 2.70 | 0.50 | 1.50 | 3 | 1.37 | 0.33 | 0.75 | 4 |
| Q6P2Q9 | Pre-mRNA-processing-splicing factor 8 | PRPF8 | 3.90 | 4 | 273.4 | 8.84 | 0.85 | 0.67 | 0.67 | 3 | 0.83 | 0.50 | 0.83 | 3 | 1.44 | 0.50 | 0.83 | 3 | 0.40 | 0.50 | 0.67 | 3 | 0.88 | 0.54 | 0.75 | 4 |
| P07451 | Carbonic anhydrase 3 | CA3 | 8.46 | 2 | 29.5 | 7.34 | 0.00 | 0.67 | 0.67 | 3 | 0.00 | 0.33 | 0.33 | 2 | 0.36 | 0.67 | 0.67 | 3 | 1.33 | 1.00 | 1.33 | 5 | 0.42 | 0.67 | 0.75 | 4 |
| P20774 | Mimecan | OGN | 6.38 | 2 | 33.9 | 5.63 | 3.06 | 1.00 | 1.50 | 4 | 0.88 | 0.33 | 0.50 | 2 | 0.95 | 0.50 | 0.50 | 2 | 0.00 | 0.50 | 0.50 | 2 | 1.22 | 0.58 | 0.75 | 4 |
| Q15233 | Non-POU domain-containing octamer-binding protein | NONO | 4.88 | 1 | 54.2 | 8.95 | 1.41 | 0.50 | 1.00 | 3 | 1.17 | 0.33 | 0.50 | 2 | 0.32 | 0.50 | 1.00 | 3 | 0.35 | 0.33 | 0.50 | 2 | 0.81 | 0.42 | 0.75 | 4 |
| P0C0S5 | Histone H2A.Z | H2AFZ | 42.97 | 2 | 13.5 | 10.58 | 1.14 | 0.67 | 0.67 | 3 | 2.04 | 1.33 | 1.50 | 5 | 0.29 | 0.33 | 0.33 | 2 | 0.58 | 0.50 | 0.50 | 3 | 1.01 | 0.71 | 0.75 | 4 |
| P50213 | Isocitrate dehydrogenase [NAD] subunit alpha, mitochondrial | IDH3A | 10.93 | 2 | 39.6 | 6.92 | 1.23 | 0.67 | 1.33 | 4 | 0.35 | 0.33 | 0.33 | 2 | 0.57 | 0.33 | 0.50 | 2 | 1.18 | 0.50 | 0.83 | 2 | 0.83 | 0.46 | 0.75 | 4 |
| Q01995 | Transgelin | TAGLN | 9.95 | 2 | 22.6 | 8.84 | 0.29 | 0.50 | 0.67 | 3 | 0.86 | 0.50 | 0.67 | 3 | 1.14 | 0.83 | 1.00 | 5 | 0.87 | 0.67 | 0.67 | 3 | 0.79 | 0.63 | 0.75 | 4 |
| A0A1B0GUS4 | Ubiquitin-conjugating enzyme E2 L5 | UBE2L5 | 14.29 | 1 | 17.9 | 7.84 | 2.24 | 0.67 | 0.83 | 4 | 1.64 | 0.33 | 0.67 | 2 | 1.73 | 0.67 | 1.00 | 4 | 0.40 | 0.17 | 0.33 | 1 | 1.50 | 0.46 | 0.71 | 4 |
| Q15149 | Plectin | PLEC | 2.26 | 4 | 531.5 | 5.96 | 1.17 | 0.67 | 0.83 | 3 | 2.53 | 1.00 | 1.33 | 4 | 0.62 | 0.33 | 0.33 | 2 | 0.34 | 0.33 | 0.33 | 2 | 1.16 | 0.58 | 0.71 | 4 |
| H3BN98 | Uncharacterized protein (Fragment) |  | 17.72 | 2 | 27.2 | 9.55 | 0.68 | 0.67 | 0.83 | 4 | 0.81 | 0.67 | 0.83 | 3 | 1.05 | 0.67 | 0.83 | 4 | 0.00 | 0.33 | 0.33 | 2 | 0.63 | 0.58 | 0.71 | 4 |
| Q6NUK1 | Calcium-binding mitochondrial carrier protein SCaMC-1 | SLC25A24 | 3.35 | 1 | 53.3 | 6.33 | 1.19 | 0.67 | 0.67 | 4 | 1.21 | 0.33 | 0.67 | 2 | 1.60 | 0.50 | 0.83 | 3 | 0.94 | 0.50 | 0.67 | 3 | 1.24 | 0.50 | 0.71 | 4 |
| O14980 | Exportin-1 | XPO1 | 5.88 | 4 | 123.3 | 6.06 | 0.28 | 0.33 | 0.33 | 2 | 0.55 | 0.33 | 0.33 | 2 | 1.14 | 1.00 | 1.17 | 5 | 1.18 | 0.50 | 0.83 | 2 | 0.79 | 0.54 | 0.67 | 4 |
| P21796 | Voltage-dependent anion-selective channel protein 1 | VDAC1 | 13.78 | 2 | 30.8 | 8.54 | 0.30 | 0.17 | 0.17 | 1 | 0.29 | 0.83 | 0.83 | 4 | 0.00 | 0.50 | 0.83 | 3 | 0.31 | 0.33 | 0.83 | 2 | 0.23 | 0.46 | 0.67 | 4 |
| O60218 | Aldo-keto reductase family 1 member B10 | AKR1B10 | 6.33 | 1 | 36.0 | 7.84 | 0.00 | 0.17 | 0.17 | 1 | 1.79 | 0.50 | 0.83 | 3 | 2.70 | 0.83 | 1.67 | 5 | 0.00 | 0.00 | 0.00 | 0 | 1.12 | 0.38 | 0.67 | 3 |
| P26641 | Elongation factor 1-gamma | EEF1G | 16.48 | 3 | 50.1 | 6.67 | 0.00 | 0.17 | 0.17 | 1 | 0.00 | 0.17 | 0.17 | 1 | 1.95 | 1.17 | 1.50 | 4 | 1.76 | 0.50 | 0.83 | 3 | 0.93 | 0.50 | 0.67 | 4 |
| Q9H0U4 | Ras-related protein Rab-1B | RAB1B | 17.91 | 1 | 22.2 | 5.73 | 0.67 | 0.33 | 0.33 | 2 | 1.42 | 1.00 | 1.17 | 5 | 1.67 | 0.67 | 1.00 | 3 | 0.00 | 0.17 | 0.17 | 1 | 0.94 | 0.54 | 0.67 | 4 |
| Q14315 | Filamin-C | FLNC | 3.89 | 5 | 290.8 | 5.97 | 0.30 | 0.50 | 0.67 | 2 | 0.86 | 0.50 | 0.67 | 1 | 0.00 | 0.50 | 0.67 | 2 | 0.38 | 0.33 | 0.67 | 2 | 0.38 | 0.46 | 0.67 | 4 |
| P49368 | T-complex protein 1 subunit gamma | CCT3 | 14.86 | 4 | 60.5 | 6.49 | 0.90 | 0.50 | 0.50 | 3 | 0.96 | 0.50 | 0.67 | 3 | 0.30 | 0.67 | 0.67 | 3 | 0.35 | 0.83 | 0.83 | 4 | 0.63 | 0.63 | 0.67 | 4 |
| P62820 | Ras-related protein Rab-1A | RAB1A | 17.56 | 1 | 22.7 | 6.21 | 0.32 | 0.17 | 0.17 | 1 | 1.52 | 1.17 | 1.33 | 4 | 1.01 | 0.67 | 0.83 | 3 | 0.42 | 0.33 | 0.33 | 2 | 0.82 | 0.58 | 0.67 | 4 |
| Q9Y2X3 | Nucleolar protein 58 | NOP58 | 6.99 | 2 | 59.5 | 8.92 | 1.27 | 0.50 | 0.50 | 3 | 0.63 | 0.33 | 0.33 | 2 | 1.52 | 0.67 | 0.83 | 3 | 1.98 | 0.83 | 1.00 | 4 | 1.35 | 0.58 | 0.67 | 4 |
| Q10567 | AP-1 complex subunit beta-1 | AP1B1 | 5.06 | 1 | 104.6 | 5.06 | 0.43 | 0.17 | 0.17 | 1 | 0.92 | 0.67 | 1.00 | 4 | 0.59 | 0.67 | 0.67 | 3 | 0.27 | 0.50 | 0.83 | 3 | 0.55 | 0.50 | 0.67 | 4 |
| Q8NFV4 | Protein ABHD11 | ABHD11 | 6.67 | 1 | 34.7 | 9.48 | 0.00 | 0.17 | 0.33 | 1 | 0.81 | 0.50 | 1.00 | 3 | 0.00 | 0.33 | 0.33 | 2 | 1.08 | 0.33 | 1.00 | 2 | 0.47 | 0.33 | 0.67 | 4 |
| J3KQ32 | Obg-like ATPase 1 | OLA1 | 6.25 | 2 | 46.9 | 8.06 | 0.32 | 0.33 | 0.50 | 2 | 1.42 | 0.67 | 1.17 | 3 | 1.64 | 0.67 | 0.83 | 4 | 0.00 | 0.00 | 0.00 | 0 | 0.84 | 0.42 | 0.63 | 3 |
| Q15404 | Ras suppressor protein 1 | RSU1 | 18.05 | 2 | 31.5 | 8.65 | 0.00 | 0.33 | 0.50 | 2 | 0.75 | 0.67 | 0.67 | 3 | 1.02 | 0.67 | 0.67 | 4 | 0.00 | 0.50 | 0.67 | 3 | 0.44 | 0.54 | 0.63 | 4 |
| Q15435 | Protein phosphatase 1 regulatory subunit 7 | PPP1R7 | 5.56 | 2 | 41.5 | 4.91 | 0.59 | 0.67 | 0.83 | 4 | 0.60 | 0.33 | 0.33 | 2 | 1.30 | 0.67 | 0.83 | 4 | 0.57 | 0.50 | 0.50 | 3 | 0.76 | 0.54 | 0.63 | 4 |
| O95372 | Acyl-protein thioesterase 2 | LYPLA2 | 22.08 | 2 | 24.7 | 7.23 | 0.41 | 0.17 | 0.17 | 1 | 0.88 | 0.50 | 0.67 | 3 | 1.29 | 0.67 | 0.83 | 4 | 1.68 | 0.67 | 0.83 | 4 | 1.07 | 0.50 | 0.63 | 4 |
| A0A3B3ITK0 | Thrombospondin-2 | THBS2 | 5.44 | 2 | 130.4 | 4.83 | 0.35 | 0.17 | 0.17 | 1 | 0.00 | 0.17 | 0.17 | 1 | 1.03 | 0.67 | 0.83 | 3 | 1.94 | 1.00 | 1.33 | 3 | 0.83 | 0.50 | 0.63 | 4 |
| P35232 | Prohibitin | PHB | 31.62 | 5 | 29.8 | 5.76 | 0.29 | 0.17 | 0.17 | 1 | 0.39 | 1.17 | 1.67 | 3 | 0.00 | 0.17 | 0.17 | 1 | 0.00 | 0.33 | 0.50 | 2 | 0.17 | 0.46 | 0.63 | 4 |
| P27824 | Calnexin | CANX | 7.94 | 3 | 67.5 | 4.60 | 0.00 | 0.17 | 0.17 | 1 | 0.97 | 0.67 | 0.67 | 3 | 0.55 | 0.50 | 0.50 | 3 | 0.00 | 1.00 | 1.17 | 4 | 0.38 | 0.58 | 0.63 | 4 |
| P53396 | ATP-citrate synthase | ACLY | 7.54 | 5 | 120.8 | 7.33 | 0.58 | 0.33 | 0.33 | 2 | 0.89 | 0.33 | 0.50 | 2 | 1.04 | 0.67 | 0.67 | 4 | 1.18 | 1.00 | 1.00 | 5 | 0.92 | 0.58 | 0.63 | 4 |
| P55327 | Tumor protein D52 | TPD52 | 34.82 | 3 | 24.3 | 4.83 | 0.40 | 0.50 | 0.67 | 3 | 0.00 | 0.50 | 0.50 | 3 | 0.30 | 0.83 | 0.83 | 5 | 0.29 | 0.50 | 0.50 | 3 | 0.25 | 0.58 | 0.63 | 4 |
| Q9Y235 | C->U-editing enzyme APOBEC-2 | APOBEC2 | 8.04 | 1 | 25.7 | 4.84 | 1.63 | 0.33 | 0.83 | 2 | 1.19 | 0.33 | 1.00 | 2 | 0.32 | 0.17 | 0.17 | 1 | 0.84 | 0.33 | 0.50 | 2 | 1.00 | 0.29 | 0.63 | 4 |
| P62304 | Small nuclear ribonucleoprotein E | SNRPE | 11.96 | 1 | 10.8 | 9.44 | 0.56 | 0.33 | 0.50 | 2 | 0.57 | 0.50 | 0.50 | 3 | 0.28 | 0.50 | 0.67 | 3 | 1.19 | 0.50 | 0.67 | 3 | 0.65 | 0.46 | 0.58 | 4 |
| Q05707 | Collagen alpha-1(XIV) chain | COL14A1 | 1.00 | 1 | 193.4 | 5.30 | 0.32 | 0.33 | 0.33 | 2 | 0.61 | 0.33 | 0.50 | 2 | 0.56 | 0.50 | 0.50 | 3 | 1.90 | 0.83 | 1.00 | 5 | 0.84 | 0.50 | 0.58 | 4 |
| P52209 | 6-phosphogluconate dehydrogenase, decarboxylating | PGD | 11.80 | 3 | 53.1 | 7.23 | 0.86 | 0.50 | 0.50 | 3 | 0.98 | 0.67 | 0.67 | 4 | 0.94 | 0.67 | 0.67 | 3 | 0.61 | 0.33 | 0.50 | 2 | 0.84 | 0.54 | 0.58 | 4 |
| P30419 | Glycylpeptide N-tetradecanoyltransferase 1 | NMT1 | 8.06 | 2 | 56.8 | 7.80 | 0.36 | 0.33 | 0.33 | 2 | 0.63 | 0.33 | 0.50 | 1 | 0.34 | 0.83 | 0.83 | 5 | 1.10 | 0.50 | 0.67 | 3 | 0.61 | 0.50 | 0.58 | 4 |
| P07996 | Thrombospondin-1 | THBS1 | 4.10 | 1 | 129.3 | 4.94 | 0.35 | 0.17 | 0.17 | 1 | 0.00 | 0.33 | 0.33 | 2 | 0.39 | 0.33 | 0.33 | 2 | 2.21 | 1.17 | 1.50 | 5 | 0.74 | 0.50 | 0.58 | 4 |
| P02675 | Fibrinogen beta chain | FGB | 8.15 | 4 | 55.9 | 8.27 | 0.66 | 0.33 | 0.50 | 1 | 1.00 | 0.50 | 0.67 | 3 | 0.68 | 0.83 | 0.83 | 5 | 0.33 | 0.17 | 0.33 | 1 | 0.67 | 0.46 | 0.58 | 4 |
| Q5XKE5 | Keratin, type II cytoskeletal 79 | KRT79 | 9.35 | 1 | 57.8 | 7.20 | 0.00 | 0.50 | 0.50 | 2 | 0.27 | 0.50 | 0.50 | 2 | 1.09 | 1.00 | 1.17 | 4 | 0.27 | 0.17 | 0.17 | 1 | 0.41 | 0.54 | 0.58 | 4 |
| P17812 | CTP synthase 1 | CTPS1 | 2.71 | 1 | 66.6 | 6.46 | 0.63 | 0.33 | 0.33 | 2 | 0.67 | 0.33 | 0.33 | 2 | 2.14 | 0.83 | 1.33 | 5 | 0.44 | 0.33 | 0.33 | 2 | 0.97 | 0.46 | 0.58 | 4 |
| A0A1W2PQS6 | RPS10-NUDT3 readthrough | RPS10-NUDT3 | 5.15 | 1 | 33.1 | 9.29 | 0.87 | 0.33 | 0.33 | 2 | 0.91 | 0.17 | 0.33 | 1 | 1.17 | 0.33 | 0.50 | 2 | 1.95 | 0.83 | 1.17 | 5 | 1.22 | 0.42 | 0.58 | 4 |
| P25787 | Proteasome subunit alpha type-2 | PSMA2 | 17.09 | 2 | 25.9 | 7.43 | 1.35 | 0.50 | 0.83 | 3 | 0.58 | 0.33 | 0.50 | 2 | 0.89 | 0.50 | 0.50 | 3 | 0.79 | 0.33 | 0.50 | 2 | 0.90 | 0.42 | 0.58 | 4 |
| D6RBZ0 | Heterogeneous nuclear ribonucleoprotein A/B | HNRNPAB | 10.09 | 2 | 35.7 | 6.95 | 0.31 | 0.17 | 0.17 | 1 | 0.00 | 0.17 | 0.17 | 1 | 1.44 | 1.00 | 1.17 | 4 | 1.22 | 0.67 | 0.83 | 3 | 0.74 | 0.50 | 0.58 | 4 |
| Q13011 | Delta(3,5)-Delta(2,4)-dienoyl-CoA isomerase, mitochondrial | ECH1 | 5.79 | 1 | 35.8 | 8.00 | 0.58 | 0.17 | 0.33 | 1 | 1.42 | 0.67 | 0.83 | 4 | 0.91 | 0.33 | 0.50 | 2 | 1.50 | 0.33 | 0.67 | 2 | 1.10 | 0.38 | 0.58 | 4 |
| Q9GZS3 | WD repeat-containing protein 61 | WDR61 | 6.56 | 1 | 33.6 | 5.47 | 0.66 | 0.67 | 0.83 | 4 | 0.29 | 0.33 | 0.33 | 2 | 0.34 | 0.17 | 0.17 | 1 | 0.89 | 0.50 | 0.83 | 3 | 0.54 | 0.42 | 0.54 | 4 |
| Q9H299 | SH3 domain-binding glutamic acid-rich-like protein 3 | SH3BGRL3 | 20.43 | 1 | 10.4 | 4.93 | 0.00 | 0.17 | 0.17 | 1 | 1.34 | 0.67 | 0.67 | 4 | 0.40 | 0.50 | 0.67 | 3 | 0.77 | 0.50 | 0.67 | 3 | 0.63 | 0.46 | 0.54 | 4 |
| P62979 | Ubiquitin-40S ribosomal protein S27a | RPS27A | 24.36 | 3 | 18.0 | 9.64 | 0.00 | 0.17 | 0.17 | 1 | 0.27 | 0.33 | 0.33 | 2 | 1.22 | 1.17 | 1.33 | 5 | 0.31 | 0.33 | 0.33 | 2 | 0.45 | 0.50 | 0.54 | 4 |
| P49748 | Very long-chain specific acyl-CoA dehydrogenase, mitochondrial | ACADVL | 4.89 | 2 | 70.3 | 8.75 | 0.62 | 0.33 | 0.33 | 2 | 1.23 | 0.50 | 0.83 | 2 | 0.84 | 0.50 | 0.50 | 3 | 0.64 | 0.33 | 0.50 | 2 | 0.83 | 0.42 | 0.54 | 4 |
| Q96FQ6 | Protein S100-A16 | S100A16 | 29.13 | 2 | 11.8 | 6.79 | 0.00 | 0.50 | 0.50 | 3 | 0.91 | 0.33 | 0.50 | 2 | 1.35 | 0.67 | 0.83 | 4 | 0.58 | 0.33 | 0.33 | 2 | 0.71 | 0.46 | 0.54 | 4 |
| A0A0D9SF50 | Lys-63-specific deubiquitinase BRCC36 | BRCC3 | 3.47 | 1 | 36.1 | 6.20 | 0.35 | 0.33 | 0.83 | 2 | 0.36 | 0.33 | 0.33 | 2 | 0.00 | 0.33 | 0.33 | 2 | 0.00 | 0.50 | 0.67 | 3 | 0.18 | 0.38 | 0.54 | 4 |
| A0A0D9SF53 | ATP-dependent RNA helicase DDX3X | DDX3X | 8.46 | 4 | 81.4 | 8.07 | 0.29 | 0.17 | 0.17 | 1 | 1.74 | 1.00 | 1.00 | 3 | 0.96 | 0.67 | 0.83 | 4 | 0.00 | 0.17 | 0.17 | 1 | 0.75 | 0.50 | 0.54 | 4 |
| Q96KP4 | Cytosolic non-specific dipeptidase | CNDP2 | 16.42 | 4 | 52.8 | 5.97 | 0.60 | 0.33 | 0.33 | 2 | 1.05 | 0.50 | 0.50 | 3 | 0.75 | 0.50 | 0.50 | 2 | 1.22 | 0.50 | 0.83 | 3 | 0.91 | 0.46 | 0.54 | 4 |
| P62851 | 40S ribosomal protein S25 | RPS25 | 20.00 | 3 | 13.7 | 10.11 | 0.85 | 0.67 | 0.67 | 4 | 0.30 | 0.50 | 0.50 | 3 | 0.00 | 0.17 | 0.17 | 1 | 0.58 | 0.83 | 0.83 | 4 | 0.43 | 0.54 | 0.54 | 4 |
| P07954 | Fumarate hydratase, mitochondrial | FH | 12.16 | 3 | 54.6 | 8.76 | 0.35 | 0.17 | 0.17 | 1 | 0.72 | 0.50 | 0.67 | 2 | 0.37 | 0.83 | 1.17 | 4 | 0.51 | 0.17 | 0.17 | 1 | 0.49 | 0.42 | 0.54 | 4 |
| P02790 | Hemopexin | HPX | 1.73 | 2 | 51.6 | 7.02 | 0.59 | 1.00 | 1.17 | 5 | 0.00 | 0.33 | 0.50 | 2 | 0.00 | 0.17 | 0.17 | 1 | 0.00 | 0.33 | 0.33 | 2 | 0.15 | 0.46 | 0.54 | 4 |
| P09972 | Fructose-bisphosphate aldolase C | ALDOC | 10.71 | 2 | 39.4 | 6.87 | 0.62 | 0.33 | 0.33 | 2 | 1.11 | 0.33 | 0.50 | 2 | 1.03 | 0.67 | 0.83 | 4 | 0.95 | 0.17 | 0.50 | 1 | 0.93 | 0.38 | 0.54 | 4 |
| Q6UX71 | Plexin domain-containing protein 2 | PLXDC2 | 3.97 | 1 | 59.5 | 6.46 | 1.28 | 0.67 | 1.00 | 4 | 0.00 | 0.33 | 0.67 | 2 | 0.38 | 0.17 | 0.17 | 1 | 0.34 | 0.17 | 0.33 | 1 | 0.50 | 0.33 | 0.54 | 4 |
| Q92520 | Protein FAM3C | FAM3C | 7.49 | 1 | 24.7 | 8.29 | 0.00 | 0.00 | 0.00 | 0 | 0.93 | 0.33 | 0.50 | 2 | 0.60 | 0.33 | 0.33 | 2 | 1.47 | 0.83 | 1.33 | 5 | 0.75 | 0.38 | 0.54 | 3 |
| Q15942 | Zyxin | ZYX | 3.50 | 1 | 61.2 | 6.67 | 0.00 | 0.00 | 0.00 | 0 | 0.90 | 0.50 | 0.83 | 3 | 1.55 | 0.67 | 1.17 | 4 | 0.29 | 0.17 | 0.17 | 1 | 0.68 | 0.33 | 0.54 | 3 |
| O75112 | LIM domain-binding protein 3 | LDB3 | 6.46 | 2 | 77.1 | 8.13 | 1.71 | 0.33 | 0.50 | 2 | 1.69 | 0.50 | 1.00 | 2 | 0.80 | 0.33 | 0.33 | 2 | 0.85 | 0.33 | 0.33 | 2 | 1.26 | 0.38 | 0.54 | 4 |
| P35527 | Keratin, type I cytoskeletal 9 | KRT9 | 16.53 | 5 | 62.0 | 5.24 | 0.00 | 0.00 | 0.00 | 0 | 0.00 | 0.00 | 0.00 | 0 | 2.86 | 1.33 | 2.00 | 2 | 0.00 | 0.00 | 0.00 | 0 | 0.71 | 0.33 | 0.50 | 1 |
| Q15436 | Protein transport protein Sec23A | SEC23A | 7.58 | 3 | 86.1 | 7.08 | 0.89 | 0.50 | 0.50 | 2 | 0.43 | 0.33 | 0.33 | 2 | 1.10 | 0.67 | 0.83 | 3 | 0.00 | 0.33 | 0.33 | 2 | 0.60 | 0.46 | 0.50 | 4 |
| P52565 | Rho GDP-dissociation inhibitor 1 | ARHGDIA | 25.00 | 4 | 23.2 | 5.11 | 0.28 | 0.50 | 0.50 | 3 | 0.87 | 0.67 | 0.67 | 3 | 0.94 | 0.50 | 0.50 | 2 | 0.54 | 0.33 | 0.33 | 2 | 0.66 | 0.50 | 0.50 | 4 |
| P43686 | 26S proteasome regulatory subunit 6B | PSMC4 | 12.20 | 2 | 47.3 | 5.21 | 1.07 | 0.67 | 0.83 | 4 | 0.89 | 0.33 | 0.50 | 2 | 0.00 | 0.33 | 0.33 | 2 | 0.58 | 0.33 | 0.33 | 2 | 0.64 | 0.42 | 0.50 | 4 |
| P12109 | Collagen alpha-1(VI) chain | COL6A1 | 3.31 | 3 | 108.5 | 5.43 | 0.66 | 0.67 | 0.83 | 3 | 0.00 | 0.17 | 0.17 | 1 | 0.00 | 0.50 | 0.50 | 3 | 0.37 | 0.50 | 0.50 | 3 | 0.26 | 0.46 | 0.50 | 4 |
| P20700 | Lamin-B1 | LMNB1 | 4.10 | 1 | 66.4 | 5.16 | 0.79 | 0.33 | 0.33 | 2 | 0.51 | 0.33 | 0.33 | 2 | 2.15 | 0.67 | 1.00 | 4 | 0.39 | 0.33 | 0.33 | 2 | 0.96 | 0.42 | 0.50 | 4 |
| Q9NYU2 | UDP-glucose:glycoprotein glucosyltransferase 1 | UGGT1 | 7.52 | 5 | 177.1 | 5.63 | 0.40 | 0.17 | 0.17 | 1 | 1.01 | 0.50 | 0.67 | 2 | 0.36 | 0.67 | 0.67 | 3 | 0.41 | 0.33 | 0.50 | 2 | 0.54 | 0.42 | 0.50 | 4 |
| Q09666 | Neuroblast differentiation-associated protein AHNAK | AHNAK | 2.80 | 7 | 628.7 | 6.15 | 0.36 | 0.17 | 0.17 | 1 | 0.87 | 0.33 | 0.50 | 1 | 1.03 | 0.83 | 0.83 | 4 | 0.34 | 0.50 | 0.50 | 3 | 0.65 | 0.46 | 0.50 | 4 |
| P60981 | Destrin | DSTN | 10.30 | 1 | 18.5 | 7.85 | 0.32 | 0.17 | 0.17 | 1 | 1.47 | 0.67 | 0.83 | 4 | 0.32 | 0.50 | 0.50 | 3 | 0.89 | 0.50 | 0.50 | 3 | 0.75 | 0.46 | 0.50 | 4 |
| Q7Z4W1 | L-xylulose reductase | DCXR | 11.48 | 1 | 25.9 | 8.10 | 0.00 | 0.00 | 0.00 | 0 | 4.24 | 0.33 | 1.67 | 2 | 0.00 | 0.00 | 0.00 | 0 | 0.84 | 0.17 | 0.33 | 1 | 1.27 | 0.13 | 0.50 | 2 |
| P28066 | Proteasome subunit alpha type-5 | PSMA5 | 4.98 | 1 | 26.4 | 4.79 | 0.00 | 0.33 | 0.33 | 2 | 0.58 | 0.50 | 0.50 | 3 | 0.33 | 0.33 | 0.33 | 2 | 0.85 | 0.67 | 0.83 | 4 | 0.44 | 0.46 | 0.50 | 4 |
| Q9H9B4 | Sideroflexin-1 | SFXN1 | 10.56 | 1 | 35.6 | 9.07 | 0.00 | 0.00 | 0.00 | 0 | 0.76 | 0.50 | 0.50 | 3 | 0.82 | 0.67 | 0.83 | 4 | 0.72 | 0.67 | 0.67 | 4 | 0.58 | 0.46 | 0.50 | 3 |
| P36776 | Lon protease homolog, mitochondrial | LONP1 | 7.19 | 2 | 106.4 | 6.39 | 0.35 | 0.33 | 0.33 | 2 | 0.44 | 0.33 | 0.67 | 2 | 0.35 | 0.67 | 0.67 | 4 | 0.51 | 0.17 | 0.33 | 1 | 0.41 | 0.38 | 0.50 | 4 |
| P30085 | UMP-CMP kinase | CMPK1 | 14.29 | 2 | 22.2 | 5.57 | 0.00 | 0.00 | 0.00 | 0 | 1.00 | 0.50 | 0.50 | 3 | 1.39 | 0.33 | 0.67 | 2 | 0.95 | 0.50 | 0.67 | 2 | 0.83 | 0.33 | 0.46 | 3 |
| P42704 | Leucine-rich PPR motif-containing protein, mitochondrial | LRPPRC | 2.80 | 2 | 157.8 | 6.13 | 0.00 | 0.00 | 0.00 | 0 | 0.35 | 0.50 | 0.67 | 3 | 0.37 | 0.67 | 0.67 | 4 | 0.68 | 0.50 | 0.50 | 3 | 0.35 | 0.42 | 0.46 | 3 |
| P13010 | X-ray repair cross-complementing protein 5 | XRCC5 | 8.47 | 3 | 82.7 | 5.81 | 0.36 | 0.50 | 0.50 | 3 | 1.43 | 0.50 | 0.83 | 2 | 0.56 | 0.33 | 0.50 | 2 | 0.00 | 0.00 | 0.00 | 0 | 0.59 | 0.33 | 0.46 | 3 |
| O94973 | AP-2 complex subunit alpha-2 | AP2A2 | 5.75 | 2 | 103.9 | 6.96 | 0.00 | 0.17 | 0.17 | 1 | 0.43 | 0.17 | 0.17 | 1 | 0.00 | 0.50 | 0.67 | 3 | 1.21 | 0.83 | 0.83 | 4 | 0.41 | 0.42 | 0.46 | 4 |
| A0A087WWU8 | Tropomyosin alpha-3 chain | TPM3 | 17.18 | 1 | 26.4 | 4.78 | 0.28 | 0.33 | 0.33 | 2 | 0.66 | 0.83 | 1.17 | 3 | 0.28 | 0.17 | 0.17 | 1 | 0.36 | 0.17 | 0.17 | 1 | 0.39 | 0.38 | 0.46 | 4 |
| P18428 | Lipopolysaccharide-binding protein | LBP | 7.69 | 2 | 53.4 | 6.70 | 1.06 | 0.33 | 0.50 | 2 | 1.07 | 0.50 | 0.50 | 3 | 1.51 | 0.67 | 0.83 | 4 | 0.00 | 0.00 | 0.00 | 0 | 0.91 | 0.38 | 0.46 | 3 |
| Q9Y4L1 | Hypoxia up-regulated protein 1 | HYOU1 | 8.91 | 4 | 111.3 | 5.22 | 0.67 | 0.33 | 0.33 | 2 | 1.01 | 0.67 | 0.67 | 3 | 0.33 | 0.17 | 0.17 | 1 | 0.86 | 0.67 | 0.67 | 4 | 0.72 | 0.46 | 0.46 | 4 |
| Q14764 | Major vault protein | MVP | 6.83 | 2 | 99.3 | 5.48 | 0.75 | 0.33 | 0.33 | 1 | 0.71 | 0.67 | 1.33 | 2 | 0.00 | 0.17 | 0.17 | 1 | 0.00 | 0.00 | 0.00 | 0 | 0.36 | 0.29 | 0.46 | 3 |
| Q14103 | Heterogeneous nuclear ribonucleoprotein D0 | HNRNPD | 12.68 | 3 | 38.4 | 7.81 | 0.33 | 0.17 | 0.17 | 1 | 0.92 | 0.33 | 0.50 | 2 | 0.91 | 0.50 | 0.67 | 2 | 0.59 | 0.50 | 0.50 | 3 | 0.69 | 0.38 | 0.46 | 4 |
| P61247 | 40S ribosomal protein S3a | RPS3A | 6.44 | 1 | 29.9 | 9.73 | 0.91 | 0.50 | 0.50 | 3 | 0.27 | 0.33 | 0.33 | 2 | 0.33 | 0.50 | 0.50 | 3 | 0.38 | 0.33 | 0.33 | 2 | 0.47 | 0.42 | 0.42 | 4 |
| Q14324 | Myosin-binding protein C, fast-type | MYBPC2 | 5.70 | 3 | 128.0 | 7.52 | 2.12 | 0.67 | 1.00 | 3 | 0.34 | 0.33 | 0.33 | 2 | 0.00 | 0.17 | 0.17 | 1 | 0.00 | 0.17 | 0.17 | 1 | 0.62 | 0.33 | 0.42 | 4 |
| Q99497 | Protein/nucleic acid deglycase DJ-1 | PARK7 | 21.69 | 2 | 19.9 | 6.79 | 1.09 | 0.50 | 0.50 | 3 | 0.84 | 0.33 | 0.50 | 2 | 0.39 | 0.17 | 0.17 | 1 | 0.87 | 0.33 | 0.50 | 2 | 0.80 | 0.33 | 0.42 | 4 |
| P63010 | AP-2 complex subunit beta | AP2B1 | 7.90 | 2 | 104.5 | 5.38 | 0.72 | 0.33 | 0.50 | 2 | 0.00 | 0.50 | 0.50 | 3 | 0.64 | 0.50 | 0.50 | 3 | 0.00 | 0.17 | 0.17 | 1 | 0.34 | 0.38 | 0.42 | 4 |
| P0C7P4 | Putative cytochrome b-c1 complex subunit Rieske-like protein 1 | UQCRFS1P1 | 7.42 | 1 | 30.8 | 8.87 | 0.30 | 0.17 | 0.17 | 1 | 1.96 | 0.50 | 1.00 | 3 | 0.42 | 0.33 | 0.33 | 2 | 0.00 | 0.17 | 0.17 | 1 | 0.67 | 0.29 | 0.42 | 4 |
| P53992 | Protein transport protein Sec24C | SEC24C | 1.65 | 1 | 118.2 | 7.06 | 0.63 | 0.33 | 0.50 | 2 | 0.91 | 0.50 | 0.67 | 3 | 0.30 | 0.33 | 0.33 | 2 | 0.29 | 0.17 | 0.17 | 1 | 0.53 | 0.33 | 0.42 | 4 |
| P46778 | 60S ribosomal protein L21 | RPL21 | 11.25 | 1 | 18.6 | 10.49 | 0.30 | 0.17 | 0.17 | 1 | 0.29 | 0.17 | 0.17 | 1 | 0.95 | 0.33 | 0.50 | 2 | 1.22 | 0.33 | 0.83 | 2 | 0.69 | 0.25 | 0.42 | 4 |
| P49915 | GMP synthase [glutamine-hydrolyzing] | GMPS | 2.74 | 1 | 76.7 | 6.87 | 0.30 | 0.17 | 0.17 | 1 | 0.60 | 0.33 | 0.33 | 2 | 0.99 | 0.83 | 0.83 | 5 | 0.55 | 0.17 | 0.33 | 1 | 0.61 | 0.38 | 0.42 | 4 |
| Q9BS26 | Endoplasmic reticulum resident protein 44 | ERP44 | 5.91 | 1 | 46.9 | 5.26 | 0.00 | 0.17 | 0.33 | 1 | 0.00 | 0.33 | 0.33 | 2 | 0.78 | 0.50 | 0.50 | 3 | 0.00 | 0.50 | 0.50 | 3 | 0.20 | 0.38 | 0.42 | 4 |
| P31947 | 14-3-3 protein sigma | SFN | 17.74 | 1 | 27.8 | 4.74 | 1.14 | 0.33 | 0.67 | 2 | 0.00 | 0.17 | 0.17 | 1 | 0.29 | 0.33 | 0.50 | 2 | 0.27 | 0.33 | 0.33 | 2 | 0.43 | 0.29 | 0.42 | 4 |
| P39023 | 60S ribosomal protein L3 | RPL3 | 11.91 | 2 | 46.1 | 10.18 | 0.00 | 0.17 | 0.17 | 1 | 0.39 | 0.33 | 0.33 | 2 | 1.79 | 0.67 | 1.17 | 4 | 0.00 | 0.00 | 0.00 | 0 | 0.54 | 0.29 | 0.42 | 3 |
| P13645 | Keratin, type I cytoskeletal 10 | KRT10 | 7.71 | 2 | 58.8 | 5.21 | 1.26 | 0.50 | 0.67 | 2 | 0.37 | 0.33 | 0.33 | 2 | 1.37 | 0.33 | 0.50 | 2 | 0.00 | 0.17 | 0.17 | 1 | 0.75 | 0.33 | 0.42 | 4 |
| E9PJH4 | 40S ribosomal protein S3 | RPS3 | 37.39 | 1 | 12.9 | 8.97 | 0.27 | 0.33 | 0.33 | 2 | 0.56 | 0.50 | 0.67 | 3 | 0.00 | 0.33 | 0.33 | 2 | 0.00 | 0.33 | 0.33 | 2 | 0.21 | 0.38 | 0.42 | 4 |
| P53621 | Coatomer subunit alpha | COPA | 4.90 | 3 | 138.3 | 7.66 | 0.64 | 0.33 | 0.33 | 2 | 0.00 | 0.00 | 0.00 | 0 | 1.26 | 0.67 | 0.67 | 3 | 0.84 | 0.67 | 0.67 | 3 | 0.69 | 0.42 | 0.42 | 3 |
| P05141 | ADP/ATP translocase 2 | SLC25A5 | 12.42 | 3 | 32.8 | 9.69 | 0.27 | 0.17 | 0.17 | 1 | 0.31 | 0.67 | 0.67 | 4 | 1.14 | 0.67 | 0.67 | 3 | 0.00 | 0.17 | 0.17 | 1 | 0.43 | 0.42 | 0.42 | 4 |
| Q8NC51 | Plasminogen activator inhibitor 1 RNA-binding protein | SERBP1 | 3.92 | 1 | 44.9 | 8.65 | 0.31 | 0.33 | 0.33 | 2 | 0.99 | 0.33 | 0.67 | 2 | 1.30 | 0.67 | 0.67 | 4 | 0.00 | 0.00 | 0.00 | 0 | 0.65 | 0.33 | 0.42 | 3 |
| P02538 | Keratin, type II cytoskeletal 6A | KRT6A | 7.45 | 1 | 60.0 | 8.00 | 0.00 | 0.33 | 0.33 | 2 | 0.00 | 0.50 | 0.50 | 2 | 0.84 | 0.67 | 0.67 | 4 | 0.00 | 0.17 | 0.17 | 1 | 0.21 | 0.42 | 0.42 | 4 |
| P99999 | Cytochrome c | CYCS | 26.67 | 2 | 11.7 | 9.57 | 0.32 | 0.17 | 0.17 | 1 | 0.60 | 0.50 | 0.50 | 3 | 0.61 | 0.33 | 0.50 | 2 | 0.68 | 0.17 | 0.33 | 1 | 0.55 | 0.29 | 0.38 | 4 |
| P23258 | Tubulin gamma-1 chain | TUBG1 | 5.99 | 1 | 51.1 | 6.14 | 0.47 | 0.33 | 0.33 | 2 | 0.39 | 0.33 | 0.33 | 2 | 0.71 | 0.50 | 0.67 | 3 | 0.00 | 0.17 | 0.17 | 1 | 0.39 | 0.33 | 0.38 | 4 |
| E9PCR7 | 2-oxoglutarate dehydrogenase, mitochondrial | OGDH | 5.97 | 3 | 117.6 | 6.92 | 1.39 | 0.67 | 0.83 | 2 | 0.00 | 0.00 | 0.00 | 0 | 0.00 | 0.00 | 0.00 | 0 | 0.87 | 0.50 | 0.67 | 2 | 0.56 | 0.29 | 0.38 | 2 |
| P10301 | Ras-related protein R-Ras | RRAS | 12.84 | 2 | 23.5 | 6.93 | 1.14 | 0.67 | 0.67 | 4 | 0.30 | 0.17 | 0.17 | 1 | 0.27 | 0.17 | 0.17 | 1 | 0.86 | 0.33 | 0.50 | 2 | 0.64 | 0.33 | 0.38 | 4 |
| P68431 | Histone H3.1 | HIST1H3A | 23.53 | 1 | 15.4 | 11.12 | 0.00 | 0.50 | 0.50 | 3 | 0.34 | 0.33 | 0.33 | 2 | 0.67 | 0.50 | 0.50 | 3 | 0.39 | 0.17 | 0.17 | 1 | 0.35 | 0.38 | 0.38 | 4 |
| A0A087WTG3 | Cullin-3 | CUL3 | 7.89 | 2 | 39.1 | 9.48 | 0.36 | 0.50 | 0.50 | 3 | 0.29 | 0.33 | 0.33 | 2 | 0.28 | 0.50 | 0.50 | 3 | 0.00 | 0.17 | 0.17 | 1 | 0.23 | 0.38 | 0.38 | 4 |
| Q9BR76 | Coronin-1B | CORO1B | 10.02 | 2 | 54.2 | 5.88 | 0.48 | 0.17 | 0.17 | 1 | 1.19 | 0.50 | 0.67 | 3 | 0.00 | 0.17 | 0.33 | 1 | 0.00 | 0.33 | 0.33 | 2 | 0.42 | 0.29 | 0.38 | 4 |
| H0YFD6 | Trifunctional enzyme subunit alpha, mitochondrial | HADHA | 6.44 | 3 | 86.3 | 9.10 | 0.00 | 0.00 | 0.00 | 0 | 0.62 | 0.67 | 0.67 | 3 | 0.28 | 0.33 | 0.33 | 2 | 0.64 | 0.50 | 0.50 | 3 | 0.39 | 0.38 | 0.38 | 3 |
| B4DR61 | cDNA FLJ59739, highly similar to Protein transport protein Sec61 subunit alpha isoform 1 | SEC61A1 | 9.96 | 2 | 52.9 | 8.24 | 0.71 | 0.33 | 0.33 | 2 | 1.05 | 0.50 | 0.67 | 3 | 0.94 | 0.33 | 0.50 | 2 | 0.00 | 0.00 | 0.00 | 0 | 0.67 | 0.29 | 0.38 | 3 |
| P48147 | Prolyl endopeptidase | PREP | 3.10 | 1 | 80.6 | 5.86 | 0.00 | 0.00 | 0.00 | 0 | 0.48 | 0.50 | 0.50 | 3 | 0.44 | 0.67 | 0.67 | 4 | 0.36 | 0.33 | 0.33 | 2 | 0.32 | 0.38 | 0.38 | 3 |
| O60716 | Catenin delta-1 | CTNND1 | 2.27 | 1 | 108.1 | 6.23 | 1.10 | 0.33 | 0.50 | 2 | 0.00 | 0.50 | 0.67 | 3 | 0.00 | 0.00 | 0.00 | 0 | 0.00 | 0.17 | 0.33 | 1 | 0.27 | 0.25 | 0.38 | 3 |
| Q9HDC9 | Adipocyte plasma membrane-associated protein | APMAP | 12.02 | 2 | 46.5 | 6.16 | 0.00 | 0.00 | 0.00 | 0 | 1.47 | 0.50 | 0.67 | 2 | 0.42 | 0.50 | 0.50 | 2 | 0.46 | 0.17 | 0.17 | 1 | 0.58 | 0.29 | 0.33 | 3 |
| P40616 | ADP-ribosylation factor-like protein 1 | ARL1 | 25.97 | 3 | 20.4 | 5.72 | 0.29 | 0.17 | 0.17 | 1 | 0.33 | 0.33 | 0.50 | 2 | 0.00 | 0.00 | 0.00 | 0 | 0.61 | 0.67 | 0.67 | 3 | 0.31 | 0.29 | 0.33 | 3 |
| Q6PKG0 | La-related protein 1 | LARP1 | 3.83 | 2 | 123.4 | 8.82 | 0.00 | 0.00 | 0.00 | 0 | 0.34 | 0.33 | 0.33 | 2 | 0.36 | 0.50 | 0.50 | 3 | 0.95 | 0.50 | 0.50 | 3 | 0.41 | 0.33 | 0.33 | 3 |
| Q01813 | ATP-dependent 6-phosphofructokinase, platelet type | PFKP | 3.32 | 1 | 85.5 | 7.55 | 0.27 | 0.50 | 0.50 | 3 | 0.37 | 0.50 | 0.50 | 3 | 0.35 | 0.17 | 0.17 | 1 | 0.00 | 0.17 | 0.17 | 1 | 0.25 | 0.33 | 0.33 | 4 |
| Q96QK1 | Vacuolar protein sorting-associated protein 35 | VPS35 | 3.77 | 2 | 91.6 | 5.49 | 0.57 | 0.50 | 0.50 | 2 | 0.00 | 0.33 | 0.33 | 2 | 0.30 | 0.17 | 0.17 | 1 | 0.59 | 0.33 | 0.33 | 2 | 0.37 | 0.33 | 0.33 | 4 |
| C9JC84 | Fibrinogen gamma chain | FGG | 4.34 | 1 | 52.3 | 5.63 | 0.00 | 0.00 | 0.00 | 0 | 1.62 | 0.33 | 0.67 | 2 | 1.32 | 0.33 | 0.50 | 2 | 0.36 | 0.17 | 0.17 | 1 | 0.83 | 0.21 | 0.33 | 3 |
| Q86SG5 | Protein S100-A7A | S100A7A | 30.69 | 1 | 11.3 | 7.44 | 0.00 | 0.00 | 0.00 | 0 | 0.00 | 0.50 | 0.50 | 3 | 0.81 | 0.50 | 0.67 | 2 | 0.28 | 0.17 | 0.17 | 1 | 0.27 | 0.29 | 0.33 | 3 |
| A0A2R8Y891 | ATP-dependent 6-phosphofructokinase | PFKM | 5.32 | 2 | 96.8 | 8.12 | 0.27 | 0.33 | 0.33 | 2 | 1.04 | 0.50 | 0.67 | 3 | 0.35 | 0.17 | 0.17 | 1 | 0.00 | 0.17 | 0.17 | 1 | 0.41 | 0.29 | 0.33 | 4 |
| O14974 | Protein phosphatase 1 regulatory subunit 12A | PPP1R12A | 2.14 | 1 | 115.2 | 5.40 | 0.00 | 0.17 | 0.17 | 1 | 0.00 | 0.33 | 0.33 | 2 | 0.29 | 0.33 | 0.33 | 2 | 1.12 | 0.50 | 0.50 | 3 | 0.35 | 0.33 | 0.33 | 4 |
| P26447 | Protein S100-A4 | S100A4 | 10.89 | 1 | 11.7 | 6.11 | 0.00 | 0.17 | 0.17 | 1 | 0.00 | 0.17 | 0.17 | 1 | 0.00 | 0.50 | 0.67 | 3 | 0.00 | 0.33 | 0.33 | 2 | 0.00 | 0.29 | 0.33 | 4 |
| P29992 | Guanine nucleotide-binding protein subunit alpha-11 | GNA11 | 5.29 | 1 | 42.1 | 5.69 | 0.60 | 0.33 | 0.50 | 2 | 0.86 | 0.33 | 0.50 | 2 | 0.28 | 0.17 | 0.17 | 1 | 0.32 | 0.17 | 0.17 | 1 | 0.52 | 0.25 | 0.33 | 4 |
| Q07960 | Rho GTPase-activating protein 1 | ARHGAP1 | 5.92 | 1 | 50.4 | 6.29 | 0.00 | 0.50 | 0.50 | 3 | 0.00 | 0.33 | 0.33 | 2 | 0.68 | 0.33 | 0.33 | 2 | 0.00 | 0.17 | 0.17 | 1 | 0.17 | 0.33 | 0.33 | 4 |
| P21964 | Catechol O-methyltransferase | COMT | 5.90 | 1 | 30.0 | 5.47 | 0.00 | 0.00 | 0.00 | 0 | 1.20 | 0.33 | 0.50 | 2 | 0.00 | 0.17 | 0.17 | 1 | 1.19 | 0.50 | 0.67 | 3 | 0.60 | 0.25 | 0.33 | 3 |
| P61221 | ATP-binding cassette sub-family E member 1 | ABCE1 | 5.18 | 2 | 67.3 | 8.34 | 0.00 | 0.00 | 0.00 | 0 | 0.33 | 0.17 | 0.17 | 1 | 2.13 | 1.00 | 1.17 | 5 | 0.00 | 0.00 | 0.00 | 0 | 0.61 | 0.29 | 0.33 | 2 |
| P62081 | 40S ribosomal protein S7 | RPS7 | 26.80 | 2 | 22.1 | 10.10 | 0.34 | 0.33 | 0.33 | 2 | 0.00 | 0.00 | 0.00 | 0 | 1.49 | 0.50 | 0.67 | 3 | 0.35 | 0.33 | 0.33 | 2 | 0.55 | 0.29 | 0.33 | 3 |
| P40925 | Malate dehydrogenase, cytoplasmic | MDH1 | 7.78 | 1 | 36.4 | 7.36 | 0.76 | 0.33 | 0.50 | 2 | 0.00 | 0.17 | 0.17 | 1 | 0.00 | 0.00 | 0.00 | 0 | 1.14 | 0.33 | 0.67 | 2 | 0.47 | 0.21 | 0.33 | 3 |
| O00764 | Pyridoxal kinase | PDXK | 12.18 | 2 | 35.1 | 6.13 | 0.00 | 0.00 | 0.00 | 0 | 0.00 | 0.17 | 0.33 | 1 | 0.89 | 0.67 | 0.67 | 3 | 0.27 | 0.17 | 0.17 | 1 | 0.29 | 0.25 | 0.29 | 3 |
| P12110 | Collagen alpha-2(VI) chain | COL6A2 | 4.51 | 3 | 108.5 | 6.21 | 0.30 | 0.50 | 0.50 | 3 | 0.00 | 0.00 | 0.00 | 0 | 0.90 | 0.33 | 0.50 | 2 | 0.33 | 0.17 | 0.17 | 1 | 0.38 | 0.25 | 0.29 | 3 |
| P32119 | Peroxiredoxin-2 | PRDX2 | 14.65 | 2 | 21.9 | 5.97 | 0.00 | 0.00 | 0.00 | 0 | 0.00 | 0.67 | 0.83 | 4 | 0.00 | 0.17 | 0.17 | 1 | 0.00 | 0.17 | 0.17 | 1 | 0.00 | 0.25 | 0.29 | 3 |
| Q16401 | 26S proteasome non-ATPase regulatory subunit 5 | PSMD5 | 4.17 | 1 | 56.2 | 5.48 | 0.00 | 0.33 | 0.33 | 2 | 0.91 | 0.33 | 0.50 | 2 | 0.33 | 0.17 | 0.17 | 1 | 0.30 | 0.17 | 0.17 | 1 | 0.38 | 0.25 | 0.29 | 4 |
| E9PRY8 | Elongation factor 1-delta | EEF1D | 1.87 | 1 | 76.5 | 7.05 | 0.68 | 0.33 | 0.33 | 2 | 0.00 | 0.00 | 0.00 | 0 | 0.59 | 0.33 | 0.33 | 2 | 0.60 | 0.33 | 0.50 | 2 | 0.47 | 0.25 | 0.29 | 3 |
| Q92504 | Zinc transporter SLC39A7 | SLC39A7 | 5.54 | 1 | 50.1 | 6.87 | 0.39 | 0.50 | 0.50 | 3 | 0.39 | 0.17 | 0.33 | 1 | 0.00 | 0.33 | 0.33 | 2 | 0.00 | 0.00 | 0.00 | 0 | 0.20 | 0.25 | 0.29 | 3 |
| P16435 | NADPH--cytochrome P450 reductase | POR | 7.39 | 2 | 76.6 | 5.58 | 0.00 | 0.17 | 0.17 | 1 | 0.36 | 0.50 | 0.67 | 3 | 0.00 | 0.17 | 0.17 | 1 | 0.00 | 0.17 | 0.17 | 1 | 0.09 | 0.25 | 0.29 | 4 |
| Q15019 | Septin-2 | SEPT2 | 14.13 | 3 | 41.5 | 6.60 | 0.00 | 0.17 | 0.17 | 1 | 0.30 | 0.17 | 0.17 | 1 | 0.27 | 0.50 | 0.67 | 2 | 0.36 | 0.17 | 0.17 | 1 | 0.23 | 0.25 | 0.29 | 4 |
| A0A096LNX6 | Transcriptional regulator ATRX (Fragment) | ATRX | 14.29 | 1 | 19.7 | 8.87 | 0.35 | 0.17 | 0.17 | 1 | 0.75 | 0.50 | 0.50 | 3 | 0.00 | 0.00 | 0.00 | 0 | 0.40 | 0.33 | 0.50 | 2 | 0.38 | 0.25 | 0.29 | 3 |
| P19367 | Hexokinase-1 | HK1 | 2.62 | 2 | 102.4 | 6.80 | 0.00 | 0.00 | 0.00 | 0 | 0.60 | 0.33 | 0.33 | 2 | 0.59 | 0.33 | 0.33 | 2 | 0.28 | 0.33 | 0.50 | 1 | 0.37 | 0.25 | 0.29 | 3 |
| Q16658 | Fascin | FSCN1 | 3.65 | 1 | 54.5 | 7.24 | 0.00 | 0.17 | 0.17 | 1 | 0.56 | 0.50 | 0.67 | 3 | 0.35 | 0.33 | 0.33 | 2 | 0.00 | 0.00 | 0.00 | 0 | 0.23 | 0.25 | 0.29 | 3 |
| P63000 | Ras-related C3 botulinum toxin substrate 1 | RAC1 | 9.38 | 1 | 21.4 | 8.50 | 0.35 | 0.17 | 0.17 | 1 | 0.79 | 0.17 | 0.33 | 1 | 0.00 | 0.33 | 0.33 | 2 | 0.79 | 0.33 | 0.33 | 2 | 0.48 | 0.25 | 0.29 | 4 |
| P27361 | Mitogen-activated protein kinase 3 | MAPK3 | 6.07 | 1 | 43.1 | 6.74 | 0.00 | 0.50 | 0.67 | 3 | 0.00 | 0.00 | 0.00 | 0 | 0.34 | 0.33 | 0.33 | 2 | 0.00 | 0.17 | 0.17 | 1 | 0.09 | 0.25 | 0.29 | 3 |
| Q13151 | Heterogeneous nuclear ribonucleoprotein A0 | HNRNPA0 | 12.13 | 2 | 30.8 | 9.29 | 0.62 | 0.17 | 0.33 | 1 | 0.00 | 0.17 | 0.17 | 1 | 0.00 | 0.00 | 0.00 | 0 | 0.31 | 0.50 | 0.67 | 2 | 0.23 | 0.21 | 0.29 | 3 |
| Q15154 | Pericentriolar material 1 protein | PCM1 | 1.14 | 1 | 228.4 | 5.02 | 0.00 | 0.00 | 0.00 | 0 | 0.28 | 0.33 | 0.33 | 2 | 0.84 | 0.50 | 0.50 | 3 | 0.54 | 0.33 | 0.33 | 2 | 0.42 | 0.29 | 0.29 | 3 |
| P51149 | Ras-related protein Rab-7a | RAB7A | 13.04 | 2 | 23.5 | 6.70 | 0.28 | 0.17 | 0.17 | 1 | 0.27 | 0.50 | 0.50 | 3 | 0.27 | 0.17 | 0.17 | 1 | 0.37 | 0.33 | 0.33 | 2 | 0.30 | 0.29 | 0.29 | 4 |
| P52179 | Myomesin-1 | MYOM1 | 2.26 | 3 | 187.5 | 6.93 | 0.00 | 0.33 | 0.33 | 1 | 0.84 | 0.50 | 0.67 | 2 | 0.00 | 0.00 | 0.00 | 0 | 0.00 | 0.17 | 0.17 | 1 | 0.21 | 0.25 | 0.29 | 3 |
| Q9HCC0 | Methylcrotonoyl-CoA carboxylase beta chain, mitochondrial | MCCC2 | 7.99 | 2 | 61.3 | 7.68 | 0.30 | 0.17 | 0.33 | 1 | 0.00 | 0.50 | 0.50 | 2 | 0.00 | 0.00 | 0.00 | 0 | 0.59 | 0.17 | 0.33 | 1 | 0.22 | 0.21 | 0.29 | 3 |
| Q96P70 | Importin-9 | IPO9 | 2.88 | 1 | 115.9 | 4.81 | 0.00 | 0.17 | 0.17 | 1 | 0.37 | 0.17 | 0.33 | 1 | 0.72 | 0.50 | 0.67 | 3 | 0.00 | 0.00 | 0.00 | 0 | 0.27 | 0.21 | 0.29 | 3 |
| F8VV71 | Ubiquitin-conjugating enzyme E2 N | UBE2N | 23.03 | 2 | 17.7 | 8.46 | 1.17 | 0.50 | 0.67 | 3 | 0.29 | 0.17 | 0.17 | 1 | 0.00 | 0.17 | 0.17 | 1 | 0.00 | 0.17 | 0.17 | 1 | 0.36 | 0.25 | 0.29 | 4 |
| Q92820 | Gamma-glutamyl hydrolase | GGH | 7.55 | 1 | 35.9 | 7.11 | 0.00 | 0.00 | 0.00 | 0 | 1.17 | 0.33 | 0.83 | 2 | 0.00 | 0.00 | 0.00 | 0 | 0.36 | 0.17 | 0.33 | 1 | 0.38 | 0.13 | 0.29 | 2 |
| P05023 | Sodium/potassium-transporting ATPase subunit alpha-1 | ATP1A1 | 4.20 | 2 | 112.8 | 5.49 | 0.78 | 0.33 | 0.33 | 2 | 0.00 | 0.00 | 0.00 | 0 | 0.00 | 0.33 | 0.50 | 2 | 0.00 | 0.17 | 0.17 | 1 | 0.20 | 0.21 | 0.25 | 3 |
| Q9UGT4 | Sushi domain-containing protein 2 | SUSD2 | 9.49 | 4 | 90.2 | 6.28 | 0.00 | 0.00 | 0.00 | 0 | 1.04 | 0.67 | 0.83 | 3 | 0.00 | 0.00 | 0.00 | 0 | 0.34 | 0.17 | 0.17 | 1 | 0.35 | 0.21 | 0.25 | 2 |
| P48735 | Isocitrate dehydrogenase [NADP], mitochondrial | IDH2 | 8.85 | 3 | 50.9 | 8.69 | 0.00 | 0.17 | 0.17 | 1 | 0.31 | 0.17 | 0.17 | 1 | 0.58 | 0.33 | 0.33 | 2 | 0.76 | 0.17 | 0.33 | 1 | 0.41 | 0.21 | 0.25 | 4 |
| Q14697 | Neutral alpha-glucosidase AB | GANAB | 9.85 | 4 | 106.8 | 6.14 | 0.00 | 0.17 | 0.17 | 1 | 0.37 | 0.67 | 0.67 | 4 | 0.00 | 0.00 | 0.00 | 0 | 0.00 | 0.17 | 0.17 | 1 | 0.09 | 0.25 | 0.25 | 3 |
| O00159 | Unconventional myosin-Ic | MYO1C | 4.99 | 3 | 121.6 | 9.41 | 0.00 | 0.17 | 0.17 | 1 | 0.60 | 0.17 | 0.33 | 1 | 0.29 | 0.50 | 0.50 | 3 | 0.00 | 0.00 | 0.00 | 0 | 0.22 | 0.21 | 0.25 | 3 |
| E7EPK1 | Septin-7 | SEPT7 | 10.76 | 2 | 50.7 | 8.63 | 0.00 | 0.17 | 0.17 | 1 | 0.51 | 0.33 | 0.50 | 2 | 0.41 | 0.33 | 0.33 | 2 | 0.00 | 0.00 | 0.00 | 0 | 0.23 | 0.21 | 0.25 | 3 |
| Q86TD4 | Sarcalumenin | SRL | 5.04 | 3 | 100.7 | 4.40 | 0.28 | 0.33 | 0.33 | 2 | 0.00 | 0.33 | 0.50 | 2 | 0.00 | 0.00 | 0.00 | 0 | 0.00 | 0.17 | 0.17 | 1 | 0.07 | 0.21 | 0.25 | 3 |
| F8WCF6 | Actin-related protein 2/3 complex subunit 4 | ARPC4-TTLL3 | 15.47 | 2 | 21.0 | 8.76 | 0.80 | 0.33 | 0.50 | 2 | 0.37 | 0.17 | 0.17 | 1 | 0.70 | 0.17 | 0.33 | 1 | 0.00 | 0.00 | 0.00 | 0 | 0.47 | 0.17 | 0.25 | 3 |
| O75390 | Citrate synthase, mitochondrial | CS | 6.01 | 2 | 51.7 | 8.32 | 0.00 | 0.00 | 0.00 | 0 | 0.87 | 0.50 | 0.67 | 2 | 0.00 | 0.00 | 0.00 | 0 | 0.28 | 0.33 | 0.33 | 2 | 0.29 | 0.21 | 0.25 | 2 |
| P13667 | Protein disulfide-isomerase A4 | PDIA4 | 6.20 | 3 | 72.9 | 5.07 | 0.00 | 0.00 | 0.00 | 0 | 0.29 | 0.17 | 0.17 | 1 | 0.88 | 0.33 | 0.50 | 2 | 0.58 | 0.33 | 0.33 | 2 | 0.44 | 0.21 | 0.25 | 3 |
| B1AHL2 | Fibulin-1 | FBLN1 | 2.77 | 1 | 78.3 | 5.39 | 0.00 | 0.17 | 0.17 | 1 | 0.00 | 0.00 | 0.00 | 0 | 1.53 | 0.50 | 0.67 | 3 | 0.00 | 0.17 | 0.17 | 1 | 0.38 | 0.21 | 0.25 | 3 |
| Q06830 | Peroxiredoxin-1 | PRDX1 | 22.61 | 3 | 22.1 | 8.13 | 0.30 | 0.17 | 0.17 | 1 | 0.28 | 0.17 | 0.17 | 1 | 0.00 | 0.50 | 0.50 | 3 | 0.00 | 0.17 | 0.17 | 1 | 0.14 | 0.25 | 0.25 | 4 |
| Q9NR45 | Sialic acid synthase | NANS | 7.80 | 1 | 40.3 | 6.74 | 0.00 | 0.00 | 0.00 | 0 | 0.35 | 0.33 | 0.33 | 2 | 0.34 | 0.33 | 0.33 | 2 | 0.35 | 0.33 | 0.33 | 2 | 0.26 | 0.25 | 0.25 | 3 |
| O00429 | Dynamin-1-like protein | DNM1L | 8.42 | 3 | 81.8 | 6.81 | 0.63 | 0.33 | 0.50 | 2 | 0.28 | 0.17 | 0.17 | 1 | 0.00 | 0.00 | 0.00 | 0 | 0.31 | 0.33 | 0.33 | 2 | 0.30 | 0.21 | 0.25 | 3 |
| O15031 | Plexin-B2 | PLXNB2 | 1.41 | 1 | 205.0 | 6.24 | 0.00 | 0.00 | 0.00 | 0 | 0.00 | 0.17 | 0.17 | 1 | 1.22 | 0.33 | 0.67 | 2 | 0.34 | 0.17 | 0.17 | 1 | 0.39 | 0.17 | 0.25 | 3 |
| P16402 | Histone H1.3 | HIST1H1D | 9.05 | 2 | 22.3 | 11.02 | 0.27 | 0.33 | 0.33 | 2 | 0.27 | 0.17 | 0.17 | 1 | 0.27 | 0.17 | 0.33 | 1 | 0.32 | 0.17 | 0.17 | 1 | 0.28 | 0.21 | 0.25 | 4 |
| O00757 | Fructose-1,6-bisphosphatase isozyme 2 | FBP2 | 5.01 | 1 | 36.7 | 7.23 | 0.28 | 0.17 | 0.17 | 1 | 0.28 | 0.33 | 0.33 | 2 | 0.39 | 0.17 | 0.17 | 1 | 0.32 | 0.33 | 0.33 | 2 | 0.32 | 0.25 | 0.25 | 4 |
| P30542 | Adenosine receptor A1 | ADORA1 | 5.21 | 1 | 36.5 | 8.62 | 0.34 | 0.17 | 0.33 | 1 | 0.00 | 0.17 | 0.17 | 1 | 0.00 | 0.50 | 0.50 | 3 | 0.00 | 0.00 | 0.00 | 0 | 0.08 | 0.21 | 0.25 | 3 |
| P35555 | Fibrillin-1 | FBN1 | 0.94 | 2 | 312.0 | 4.93 | 0.00 | 0.00 | 0.00 | 0 | 0.30 | 0.33 | 0.33 | 2 | 0.00 | 0.33 | 0.33 | 2 | 0.27 | 0.33 | 0.33 | 2 | 0.14 | 0.25 | 0.25 | 3 |
| Q92499 | ATP-dependent RNA helicase DDX1 | DDX1 | 2.84 | 1 | 82.4 | 7.23 | 0.28 | 0.17 | 0.17 | 1 | 0.60 | 0.17 | 0.33 | 1 | 0.28 | 0.50 | 0.50 | 3 | 0.00 | 0.00 | 0.00 | 0 | 0.29 | 0.21 | 0.25 | 3 |
| Q02809 | Procollagen-lysine,2-oxoglutarate 5-dioxygenase 1 | PLOD1 | 2.06 | 1 | 83.5 | 6.95 | 0.00 | 0.00 | 0.00 | 0 | 0.63 | 0.33 | 0.33 | 2 | 0.62 | 0.33 | 0.50 | 2 | 0.39 | 0.17 | 0.17 | 1 | 0.41 | 0.21 | 0.25 | 3 |
| Q15691 | Microtubule-associated protein RP/EB family member 1 | MAPRE1 | 4.48 | 1 | 30.0 | 5.14 | 0.00 | 0.00 | 0.00 | 0 | 0.28 | 0.33 | 0.33 | 2 | 1.24 | 0.33 | 0.67 | 2 | 0.00 | 0.00 | 0.00 | 0 | 0.38 | 0.17 | 0.25 | 2 |
| P83916 | Chromobox protein homolog 1 | CBX1 | 8.65 | 1 | 21.4 | 4.93 | 0.33 | 0.17 | 0.17 | 1 | 0.55 | 0.33 | 0.33 | 2 | 0.61 | 0.33 | 0.33 | 2 | 0.00 | 0.00 | 0.00 | 0 | 0.37 | 0.21 | 0.21 | 3 |
| F8VZY0 | Myosin-binding protein C, slow-type | MYBPC1 | 2.51 | 2 | 129.6 | 5.81 | 0.00 | 0.17 | 0.17 | 1 | 0.35 | 0.33 | 0.33 | 2 | 0.00 | 0.00 | 0.00 | 0 | 0.36 | 0.33 | 0.33 | 2 | 0.18 | 0.21 | 0.21 | 3 |
| P36578 | 60S ribosomal protein L4 | RPL4 | 3.75 | 1 | 47.7 | 11.06 | 0.36 | 0.17 | 0.17 | 1 | 0.00 | 0.33 | 0.33 | 2 | 0.00 | 0.17 | 0.17 | 1 | 0.00 | 0.17 | 0.17 | 1 | 0.09 | 0.21 | 0.21 | 4 |
| F5GYJ8 | Ubiquitin thioesterase OTUB1 | OTUB1 | 5.24 | 1 | 32.3 | 4.96 | 0.00 | 0.33 | 0.50 | 2 | 0.00 | 0.00 | 0.00 | 0 | 0.27 | 0.17 | 0.17 | 1 | 0.00 | 0.17 | 0.17 | 1 | 0.07 | 0.17 | 0.21 | 3 |
| Q9UBF2 | Coatomer subunit gamma-2 | COPG2 | 3.44 | 1 | 97.6 | 5.81 | 0.00 | 0.00 | 0.00 | 0 | 0.33 | 0.17 | 0.17 | 1 | 0.30 | 0.17 | 0.17 | 1 | 0.29 | 0.33 | 0.50 | 2 | 0.23 | 0.17 | 0.21 | 3 |
| P60866 | 40S ribosomal protein S20 | RPS20 | 19.33 | 2 | 13.4 | 9.94 | 0.00 | 0.33 | 0.33 | 2 | 0.63 | 0.50 | 0.50 | 3 | 0.00 | 0.00 | 0.00 | 0 | 0.00 | 0.00 | 0.00 | 0 | 0.16 | 0.21 | 0.21 | 2 |
| P40121 | Macrophage-capping protein | CAPG | 4.60 | 1 | 38.5 | 6.19 | 0.56 | 0.17 | 0.33 | 1 | 0.56 | 0.33 | 0.33 | 2 | 0.00 | 0.17 | 0.17 | 1 | 0.00 | 0.00 | 0.00 | 0 | 0.28 | 0.17 | 0.21 | 3 |
| P61604 | 10 kDa heat shock protein, mitochondrial | HSPE1 | 11.76 | 1 | 10.9 | 8.92 | 0.00 | 0.00 | 0.00 | 0 | 0.36 | 0.33 | 0.33 | 2 | 0.35 | 0.17 | 0.17 | 1 | 0.00 | 0.33 | 0.33 | 2 | 0.18 | 0.21 | 0.21 | 3 |
| P46108 | Adapter molecule crk | CRK | 5.59 | 1 | 33.8 | 5.55 | 0.27 | 0.17 | 0.17 | 1 | 0.00 | 0.17 | 0.17 | 1 | 0.29 | 0.33 | 0.33 | 2 | 0.36 | 0.17 | 0.17 | 1 | 0.23 | 0.21 | 0.21 | 4 |
| P53007 | Tricarboxylate transport protein, mitochondrial | SLC25A1 | 11.25 | 1 | 34.0 | 9.89 | 0.00 | 0.00 | 0.00 | 0 | 0.79 | 0.33 | 0.50 | 2 | 0.00 | 0.00 | 0.00 | 0 | 0.34 | 0.17 | 0.33 | 1 | 0.28 | 0.13 | 0.21 | 2 |
| Q96AB3 | Isochorismatase domain-containing protein 2 | ISOC2 | 12.68 | 1 | 22.3 | 7.77 | 0.00 | 0.00 | 0.00 | 0 | 0.39 | 0.33 | 0.33 | 2 | 0.00 | 0.00 | 0.00 | 0 | 0.00 | 0.33 | 0.50 | 2 | 0.10 | 0.17 | 0.21 | 2 |
| Q9Y3Z3 | Deoxynucleoside triphosphate triphosphohydrolase SAMHD1 | SAMHD1 | 2.40 | 1 | 72.2 | 7.14 | 0.00 | 0.00 | 0.00 | 0 | 0.65 | 0.33 | 0.33 | 2 | 0.64 | 0.50 | 0.50 | 3 | 0.00 | 0.00 | 0.00 | 0 | 0.32 | 0.21 | 0.21 | 2 |
| Q15365 | Poly(rC)-binding protein 1 | PCBP1 | 18.26 | 3 | 37.5 | 7.09 | 0.00 | 0.00 | 0.00 | 0 | 0.27 | 0.33 | 0.33 | 2 | 0.28 | 0.17 | 0.17 | 1 | 0.00 | 0.33 | 0.33 | 1 | 0.14 | 0.21 | 0.21 | 3 |
| Q12905 | Interleukin enhancer-binding factor 2 | ILF2 | 13.59 | 3 | 43.0 | 5.26 | 0.00 | 0.17 | 0.17 | 1 | 0.29 | 0.50 | 0.50 | 3 | 0.00 | 0.00 | 0.00 | 0 | 0.27 | 0.17 | 0.17 | 1 | 0.14 | 0.21 | 0.21 | 3 |
| Q15257 | Serine/threonine-protein phosphatase 2A activator | PTPA | 8.10 | 1 | 40.6 | 5.94 | 0.36 | 0.17 | 0.17 | 1 | 0.00 | 0.00 | 0.00 | 0 | 0.68 | 0.50 | 0.67 | 3 | 0.00 | 0.00 | 0.00 | 0 | 0.26 | 0.17 | 0.21 | 2 |
| A0A087X117 | Nodal modulator 1 | NOMO1 | 3.79 | 2 | 139.4 | 5.85 | 0.00 | 0.33 | 0.50 | 2 | 0.00 | 0.17 | 0.17 | 1 | 0.00 | 0.00 | 0.00 | 0 | 0.00 | 0.17 | 0.17 | 1 | 0.00 | 0.17 | 0.21 | 3 |
| Q13838 | Spliceosome RNA helicase DDX39B | DDX39B | 10.28 | 3 | 49.0 | 5.67 | 0.00 | 0.33 | 0.33 | 2 | 0.00 | 0.17 | 0.17 | 1 | 0.00 | 0.17 | 0.17 | 1 | 0.00 | 0.17 | 0.17 | 1 | 0.00 | 0.21 | 0.21 | 4 |
| P31689 | DnaJ homolog subfamily A member 1 | DNAJA1 | 8.06 | 2 | 44.8 | 7.08 | 0.00 | 0.00 | 0.00 | 0 | 0.27 | 0.33 | 0.33 | 2 | 0.27 | 0.33 | 0.50 | 2 | 0.00 | 0.00 | 0.00 | 0 | 0.13 | 0.17 | 0.21 | 2 |
| Q8NBX0 | Saccharopine dehydrogenase-like oxidoreductase | SCCPDH | 6.76 | 1 | 47.1 | 9.14 | 0.00 | 0.00 | 0.00 | 0 | 1.46 | 0.33 | 0.67 | 2 | 0.00 | 0.17 | 0.17 | 1 | 0.00 | 0.00 | 0.00 | 0 | 0.36 | 0.13 | 0.21 | 2 |
| P35270 | Sepiapterin reductase | SPR | 7.28 | 1 | 28.0 | 8.05 | 0.67 | 0.17 | 0.33 | 1 | 0.33 | 0.17 | 0.17 | 1 | 0.00 | 0.00 | 0.00 | 0 | 0.63 | 0.17 | 0.33 | 1 | 0.41 | 0.13 | 0.21 | 3 |
| P55010 | Eukaryotic translation initiation factor 5 | EIF5 | 7.89 | 2 | 49.2 | 5.58 | 0.00 | 0.17 | 0.17 | 1 | 0.58 | 0.33 | 0.33 | 2 | 0.27 | 0.33 | 0.33 | 2 | 0.00 | 0.00 | 0.00 | 0 | 0.21 | 0.21 | 0.21 | 3 |
| P09525 | Annexin A4 | ANXA4 | 10.03 | 2 | 35.9 | 6.13 | 0.00 | 0.33 | 0.33 | 2 | 0.00 | 0.00 | 0.00 | 0 | 0.28 | 0.33 | 0.33 | 2 | 0.00 | 0.17 | 0.17 | 1 | 0.07 | 0.21 | 0.21 | 3 |
| P11177 | Pyruvate dehydrogenase E1 component subunit beta, mitochondrial | PDHB | 16.43 | 3 | 39.2 | 6.65 | 0.00 | 0.17 | 0.17 | 1 | 0.00 | 0.17 | 0.17 | 1 | 0.31 | 0.17 | 0.17 | 1 | 0.27 | 0.33 | 0.33 | 2 | 0.14 | 0.21 | 0.21 | 4 |
| P61163 | Alpha-centractin | ACTR1A | 9.04 | 2 | 42.6 | 6.64 | 0.00 | 0.00 | 0.00 | 0 | 0.28 | 0.17 | 0.17 | 1 | 0.00 | 0.17 | 0.17 | 1 | 0.28 | 0.50 | 0.50 | 3 | 0.14 | 0.21 | 0.21 | 3 |
| P45974 | Ubiquitin carboxyl-terminal hydrolase 5 | USP5 | 3.03 | 1 | 95.7 | 5.03 | 0.00 | 0.00 | 0.00 | 0 | 0.00 | 0.17 | 0.17 | 1 | 0.43 | 0.33 | 0.50 | 2 | 0.43 | 0.17 | 0.17 | 1 | 0.22 | 0.17 | 0.21 | 3 |
| P49720 | Proteasome subunit beta type-3 | PSMB3 | 24.88 | 3 | 22.9 | 6.55 | 0.31 | 0.33 | 0.33 | 2 | 0.63 | 0.33 | 0.33 | 2 | 0.00 | 0.17 | 0.17 | 1 | 0.00 | 0.00 | 0.00 | 0 | 0.23 | 0.21 | 0.21 | 3 |
| P15880 | 40S ribosomal protein S2 | RPS2 | 9.22 | 2 | 31.3 | 10.24 | 0.00 | 0.00 | 0.00 | 0 | 0.62 | 0.67 | 0.67 | 3 | 0.00 | 0.17 | 0.17 | 1 | 0.00 | 0.00 | 0.00 | 0 | 0.15 | 0.21 | 0.21 | 2 |
| A3KMH1 | von Willebrand factor A domain-containing protein 8 | VWA8 | 1.05 | 1 | 214.7 | 7.40 | 0.37 | 0.17 | 0.17 | 1 | 0.36 | 0.17 | 0.17 | 1 | 0.35 | 0.33 | 0.33 | 2 | 0.00 | 0.17 | 0.17 | 1 | 0.27 | 0.21 | 0.21 | 4 |
| H7C2N5 | UPF0577 protein KIAA1324-like (Fragment) | KIAA1324L | 2.57 | 1 | 106.3 | 5.88 | 0.00 | 0.17 | 0.17 | 1 | 0.00 | 0.00 | 0.00 | 0 | 0.00 | 0.33 | 0.33 | 2 | 0.00 | 0.33 | 0.33 | 2 | 0.00 | 0.21 | 0.21 | 3 |
| Q96AC1 | Fermitin family homolog 2 | FERMT2 | 7.79 | 3 | 77.8 | 6.70 | 0.00 | 0.00 | 0.00 | 0 | 0.00 | 0.33 | 0.33 | 2 | 0.59 | 0.50 | 0.50 | 3 | 0.00 | 0.00 | 0.00 | 0 | 0.15 | 0.21 | 0.21 | 2 |
| Q53GG5 | PDZ and LIM domain protein 3 | PDLIM3 | 4.12 | 1 | 39.2 | 6.89 | 0.00 | 0.00 | 0.00 | 0 | 0.62 | 0.33 | 0.50 | 2 | 0.29 | 0.17 | 0.17 | 1 | 0.28 | 0.17 | 0.17 | 1 | 0.30 | 0.17 | 0.21 | 3 |
| Q99538 | Legumain | LGMN | 3.93 | 1 | 49.4 | 6.55 | 0.61 | 0.33 | 0.33 | 2 | 0.00 | 0.00 | 0.00 | 0 | 0.36 | 0.17 | 0.17 | 1 | 0.75 | 0.17 | 0.33 | 1 | 0.43 | 0.17 | 0.21 | 3 |
| P51991 | Heterogeneous nuclear ribonucleoprotein A3 | HNRNPA3 | 8.47 | 2 | 39.6 | 9.01 | 0.38 | 0.33 | 0.33 | 2 | 0.30 | 0.17 | 0.17 | 1 | 0.27 | 0.17 | 0.17 | 1 | 0.00 | 0.17 | 0.17 | 1 | 0.24 | 0.21 | 0.21 | 4 |
| Q15907 | Ras-related protein Rab-11B | RAB11B | 5.96 | 1 | 24.5 | 5.94 | 0.36 | 0.17 | 0.17 | 1 | 0.30 | 0.33 | 0.33 | 2 | 0.32 | 0.17 | 0.17 | 1 | 0.00 | 0.17 | 0.17 | 1 | 0.24 | 0.21 | 0.21 | 4 |
| P38606 | V-type proton ATPase catalytic subunit A | ATP6V1A | 2.92 | 1 | 68.3 | 5.52 | 0.56 | 0.17 | 0.33 | 1 | 0.61 | 0.33 | 0.33 | 2 | 0.30 | 0.17 | 0.17 | 1 | 0.00 | 0.00 | 0.00 | 0 | 0.37 | 0.17 | 0.21 | 3 |
| P02794 | Ferritin heavy chain | FTH1 | 12.02 | 2 | 21.2 | 5.55 | 0.29 | 0.33 | 0.50 | 2 | 0.00 | 0.17 | 0.17 | 1 | 0.00 | 0.00 | 0.00 | 0 | 0.27 | 0.17 | 0.17 | 1 | 0.14 | 0.17 | 0.21 | 3 |
| O00567 | Nucleolar protein 56 | NOP56 | 7.41 | 2 | 66.0 | 9.19 | 0.89 | 0.17 | 0.33 | 1 | 0.27 | 0.33 | 0.50 | 2 | 0.00 | 0.00 | 0.00 | 0 | 0.00 | 0.00 | 0.00 | 0 | 0.29 | 0.13 | 0.21 | 2 |
| Q9UMS4 | Pre-mRNA-processing factor 19 | PRPF19 | 3.37 | 1 | 55.1 | 6.61 | 0.00 | 0.00 | 0.00 | 0 | 0.34 | 0.33 | 0.33 | 2 | 0.00 | 0.33 | 0.33 | 2 | 0.32 | 0.17 | 0.17 | 1 | 0.16 | 0.21 | 0.21 | 3 |
| P17540 | Creatine kinase S-type, mitochondrial | CKMT2 | 10.74 | 2 | 47.5 | 8.19 | 0.00 | 0.00 | 0.00 | 0 | 0.29 | 0.17 | 0.17 | 1 | 0.00 | 0.17 | 0.17 | 1 | 0.30 | 0.33 | 0.33 | 2 | 0.15 | 0.17 | 0.17 | 3 |
| Q6N075 | Molybdate-anion transporter | MFSD5 | 5.11 | 1 | 49.7 | 7.80 | 0.00 | 0.17 | 0.17 | 1 | 0.00 | 0.17 | 0.17 | 1 | 0.00 | 0.00 | 0.00 | 0 | 0.00 | 0.33 | 0.33 | 2 | 0.00 | 0.17 | 0.17 | 3 |
| P05091 | Aldehyde dehydrogenase, mitochondrial | ALDH2 | 6.00 | 2 | 56.3 | 7.05 | 0.00 | 0.17 | 0.17 | 1 | 0.00 | 0.00 | 0.00 | 0 | 0.32 | 0.17 | 0.17 | 1 | 0.28 | 0.33 | 0.33 | 2 | 0.15 | 0.17 | 0.17 | 3 |
| P10599 | Thioredoxin | TXN | 12.38 | 1 | 11.7 | 4.92 | 0.00 | 0.00 | 0.00 | 0 | 0.31 | 0.33 | 0.33 | 2 | 0.27 | 0.33 | 0.33 | 2 | 0.00 | 0.00 | 0.00 | 0 | 0.15 | 0.17 | 0.17 | 2 |
| O75223 | Gamma-glutamylcyclotransferase | GGCT | 13.83 | 1 | 21.0 | 5.14 | 0.00 | 0.00 | 0.00 | 0 | 0.42 | 0.17 | 0.17 | 1 | 0.53 | 0.33 | 0.33 | 2 | 0.00 | 0.17 | 0.17 | 1 | 0.24 | 0.17 | 0.17 | 3 |
| P06396 | Gelsolin | GSN | 6.39 | 3 | 85.6 | 6.28 | 0.37 | 0.17 | 0.17 | 1 | 0.00 | 0.00 | 0.00 | 0 | 0.00 | 0.17 | 0.17 | 1 | 0.34 | 0.33 | 0.33 | 2 | 0.18 | 0.17 | 0.17 | 3 |
| O00591 | Gamma-aminobutyric acid receptor subunit pi | GABRP | 4.77 | 1 | 50.6 | 6.99 | 0.00 | 0.00 | 0.00 | 0 | 0.00 | 0.00 | 0.00 | 0 | 0.00 | 0.00 | 0.00 | 0 | 0.36 | 0.33 | 0.67 | 2 | 0.09 | 0.08 | 0.17 | 1 |
| O60884 | DnaJ homolog subfamily A member 2 | DNAJA2 | 13.35 | 2 | 45.7 | 6.48 | 0.00 | 0.17 | 0.17 | 1 | 0.00 | 0.00 | 0.00 | 0 | 0.42 | 0.33 | 0.33 | 2 | 0.00 | 0.17 | 0.17 | 1 | 0.11 | 0.17 | 0.17 | 3 |
| P34932 | Heat shock 70 kDa protein 4 | HSPA4 | 2.14 | 1 | 94.3 | 5.19 | 0.00 | 0.00 | 0.00 | 0 | 0.27 | 0.17 | 0.17 | 1 | 0.27 | 0.17 | 0.17 | 1 | 0.32 | 0.17 | 0.33 | 1 | 0.22 | 0.13 | 0.17 | 3 |
| Q00577 | Transcriptional activator protein Pur-alpha | PURA | 9.01 | 1 | 34.9 | 6.44 | 0.00 | 0.00 | 0.00 | 0 | 0.37 | 0.17 | 0.17 | 1 | 0.38 | 0.17 | 0.17 | 1 | 0.71 | 0.33 | 0.33 | 2 | 0.36 | 0.17 | 0.17 | 3 |
| Q9ULI0 | ATPase family AAA domain-containing protein 2B | ATAD2B | 0.82 | 1 | 164.8 | 6.80 | 0.00 | 0.00 | 0.00 | 0 | 0.34 | 0.17 | 0.17 | 1 | 0.41 | 0.33 | 0.50 | 2 | 0.00 | 0.00 | 0.00 | 0 | 0.19 | 0.13 | 0.17 | 2 |
| Q96TA1 | Niban-like protein 1 | FAM129B | 6.17 | 2 | 84.1 | 6.19 | 0.00 | 0.17 | 0.17 | 1 | 0.00 | 0.00 | 0.00 | 0 | 0.35 | 0.33 | 0.33 | 2 | 0.00 | 0.17 | 0.17 | 1 | 0.09 | 0.17 | 0.17 | 3 |
| Q96C90 | Protein phosphatase 1 regulatory subunit 14B | PPP1R14B | 8.84 | 1 | 15.9 | 4.86 | 0.00 | 0.00 | 0.00 | 0 | 0.38 | 0.17 | 0.17 | 1 | 0.00 | 0.00 | 0.00 | 0 | 0.64 | 0.33 | 0.50 | 2 | 0.25 | 0.13 | 0.17 | 2 |
| P35268 | 60S ribosomal protein L22 | RPL22 | 10.16 | 1 | 14.8 | 9.19 | 0.00 | 0.00 | 0.00 | 0 | 0.29 | 0.17 | 0.17 | 1 | 0.57 | 0.33 | 0.50 | 2 | 0.00 | 0.00 | 0.00 | 0 | 0.21 | 0.13 | 0.17 | 2 |
| P55265 | Double-stranded RNA-specific adenosine deaminase | ADAR | 1.71 | 1 | 136.0 | 8.65 | 0.34 | 0.17 | 0.17 | 1 | 0.00 | 0.17 | 0.17 | 1 | 0.00 | 0.33 | 0.33 | 2 | 0.00 | 0.00 | 0.00 | 0 | 0.08 | 0.17 | 0.17 | 3 |
| Q567V2 | Mpv17-like protein 2 | MPV17L2 | 7.77 | 1 | 23.2 | 9.25 | 0.00 | 0.00 | 0.00 | 0 | 0.34 | 0.33 | 0.50 | 2 | 0.00 | 0.00 | 0.00 | 0 | 0.27 | 0.17 | 0.17 | 1 | 0.15 | 0.13 | 0.17 | 2 |
| Q03135 | Caveolin-1 | CAV1 | 11.80 | 1 | 20.5 | 6.02 | 0.44 | 0.17 | 0.17 | 1 | 0.00 | 0.00 | 0.00 | 0 | 0.00 | 0.17 | 0.17 | 1 | 0.35 | 0.33 | 0.33 | 2 | 0.20 | 0.17 | 0.17 | 3 |
| Q9UBT2 | SUMO-activating enzyme subunit 2 | UBA2 | 3.75 | 1 | 71.2 | 5.29 | 0.36 | 0.33 | 0.33 | 2 | 0.34 | 0.17 | 0.17 | 1 | 0.00 | 0.17 | 0.17 | 1 | 0.00 | 0.00 | 0.00 | 0 | 0.17 | 0.17 | 0.17 | 3 |
| P05388 | 60S acidic ribosomal protein P0 | RPLP0 | 11.04 | 3 | 34.3 | 5.97 | 0.00 | 0.00 | 0.00 | 0 | 0.27 | 0.17 | 0.17 | 1 | 0.00 | 0.17 | 0.17 | 1 | 0.28 | 0.33 | 0.33 | 2 | 0.14 | 0.17 | 0.17 | 3 |
| P61026 | Ras-related protein Rab-10 | RAB10 | 5.50 | 1 | 22.5 | 8.38 | 0.27 | 0.17 | 0.17 | 1 | 0.28 | 0.17 | 0.17 | 1 | 0.28 | 0.33 | 0.33 | 2 | 0.00 | 0.00 | 0.00 | 0 | 0.21 | 0.17 | 0.17 | 3 |
| P31930 | Cytochrome b-c1 complex subunit 1, mitochondrial | UQCRC1 | 6.04 | 1 | 52.6 | 6.37 | 0.36 | 0.17 | 0.17 | 1 | 0.82 | 0.33 | 0.33 | 2 | 0.41 | 0.17 | 0.17 | 1 | 0.00 | 0.00 | 0.00 | 0 | 0.40 | 0.17 | 0.17 | 3 |
| P35573 | Glycogen debranching enzyme | AGL | 1.24 | 1 | 174.7 | 6.76 | 0.00 | 0.00 | 0.00 | 0 | 0.00 | 0.00 | 0.00 | 0 | 0.31 | 0.17 | 0.17 | 1 | 1.06 | 0.33 | 0.50 | 2 | 0.34 | 0.13 | 0.17 | 2 |
| Q07021 | Complement component 1 Q subcomponent-binding protein, mitochondrial | C1QBP | 12.06 | 2 | 31.3 | 4.84 | 0.00 | 0.00 | 0.00 | 0 | 0.00 | 0.00 | 0.00 | 0 | 0.00 | 0.33 | 0.33 | 2 | 0.29 | 0.33 | 0.33 | 2 | 0.07 | 0.17 | 0.17 | 2 |
| P07305 | Histone H1.0 | H1F0 | 6.70 | 1 | 20.9 | 10.84 | 0.27 | 0.17 | 0.17 | 1 | 0.00 | 0.00 | 0.00 | 0 | 0.33 | 0.33 | 0.33 | 2 | 0.28 | 0.17 | 0.17 | 1 | 0.22 | 0.17 | 0.17 | 3 |
| O60518 | Ran-binding protein 6 | RANBP6 | 1.27 | 1 | 124.6 | 5.01 | 0.65 | 0.33 | 0.33 | 2 | 0.00 | 0.00 | 0.00 | 0 | 0.34 | 0.17 | 0.17 | 1 | 0.36 | 0.17 | 0.17 | 1 | 0.34 | 0.17 | 0.17 | 3 |
| O43143 | Pre-mRNA-splicing factor ATP-dependent RNA helicase DHX15 | DHX15 | 1.51 | 1 | 90.9 | 7.46 | 0.00 | 0.17 | 0.17 | 1 | 0.00 | 0.17 | 0.17 | 1 | 0.00 | 0.33 | 0.33 | 2 | 0.00 | 0.00 | 0.00 | 0 | 0.00 | 0.17 | 0.17 | 3 |
| Q9UJZ1 | Stomatin-like protein 2, mitochondrial | STOML2 | 8.43 | 1 | 38.5 | 7.39 | 0.00 | 0.17 | 0.17 | 1 | 0.00 | 0.17 | 0.17 | 1 | 0.00 | 0.17 | 0.17 | 1 | 0.39 | 0.17 | 0.17 | 1 | 0.10 | 0.17 | 0.17 | 4 |
| P54829 | Tyrosine-protein phosphatase non-receptor type 5 | PTPN5 | 4.25 | 1 | 63.5 | 4.89 | 0.00 | 0.00 | 0.00 | 0 | 0.00 | 0.00 | 0.00 | 0 | 0.36 | 0.33 | 0.33 | 2 | 0.00 | 0.33 | 0.33 | 2 | 0.09 | 0.17 | 0.17 | 2 |
| Q99733 | Nucleosome assembly protein 1-like 4 | NAP1L4 | 14.93 | 3 | 42.8 | 4.69 | 0.00 | 0.00 | 0.00 | 0 | 0.29 | 0.17 | 0.17 | 1 | 0.30 | 0.17 | 0.17 | 1 | 0.77 | 0.33 | 0.33 | 2 | 0.34 | 0.17 | 0.17 | 3 |
| P55884 | Eukaryotic translation initiation factor 3 subunit B | EIF3B | 5.28 | 3 | 92.4 | 5.00 | 0.00 | 0.00 | 0.00 | 0 | 0.57 | 0.50 | 0.50 | 3 | 0.35 | 0.17 | 0.17 | 1 | 0.00 | 0.00 | 0.00 | 0 | 0.23 | 0.17 | 0.17 | 2 |
| B0YIW6 | Archain 1, isoform CRA_a | ARCN1 | 2.17 | 1 | 61.6 | 5.85 | 0.00 | 0.00 | 0.00 | 0 | 0.67 | 0.33 | 0.33 | 2 | 0.33 | 0.17 | 0.17 | 1 | 0.33 | 0.17 | 0.17 | 1 | 0.33 | 0.17 | 0.17 | 3 |
| P11498 | Pyruvate carboxylase, mitochondrial | PC | 2.97 | 2 | 129.6 | 6.84 | 0.00 | 0.33 | 0.33 | 2 | 0.00 | 0.00 | 0.00 | 0 | 0.00 | 0.00 | 0.00 | 0 | 0.67 | 0.33 | 0.33 | 2 | 0.17 | 0.17 | 0.17 | 2 |
| P00387 | NADH-cytochrome b5 reductase 3 | CYB5R3 | 14.62 | 2 | 34.2 | 7.59 | 0.00 | 0.00 | 0.00 | 0 | 0.00 | 0.17 | 0.17 | 1 | 0.27 | 0.17 | 0.17 | 1 | 0.31 | 0.33 | 0.33 | 2 | 0.15 | 0.17 | 0.17 | 3 |
| P15088 | Mast cell carboxypeptidase A | CPA3 | 3.36 | 1 | 48.6 | 9.00 | 0.61 | 0.17 | 0.33 | 1 | 0.30 | 0.17 | 0.17 | 1 | 0.00 | 0.00 | 0.00 | 0 | 0.30 | 0.17 | 0.17 | 1 | 0.30 | 0.13 | 0.17 | 3 |
| P26440 | Isovaleryl-CoA dehydrogenase, mitochondrial | IVD | 9.86 | 2 | 46.6 | 8.05 | 0.39 | 0.33 | 0.50 | 2 | 0.00 | 0.17 | 0.17 | 1 | 0.00 | 0.00 | 0.00 | 0 | 0.00 | 0.00 | 0.00 | 0 | 0.10 | 0.13 | 0.17 | 2 |
| Q9H2U2 | Inorganic pyrophosphatase 2, mitochondrial | PPA2 | 4.79 | 1 | 37.9 | 7.39 | 0.00 | 0.00 | 0.00 | 0 | 0.28 | 0.17 | 0.17 | 1 | 0.31 | 0.17 | 0.17 | 1 | 0.33 | 0.33 | 0.33 | 2 | 0.23 | 0.17 | 0.17 | 3 |
| P49411 | Elongation factor Tu, mitochondrial | TUFM | 6.19 | 2 | 49.5 | 7.61 | 0.00 | 0.00 | 0.00 | 0 | 0.00 | 0.17 | 0.17 | 1 | 0.60 | 0.33 | 0.33 | 2 | 0.28 | 0.17 | 0.17 | 1 | 0.22 | 0.17 | 0.17 | 3 |
| E9PAV3 | Nascent polypeptide-associated complex subunit alpha, muscle-specific form | NACA | 1.30 | 2 | 205.3 | 9.58 | 0.27 | 0.50 | 0.50 | 3 | 0.27 | 0.17 | 0.17 | 1 | 0.00 | 0.00 | 0.00 | 0 | 0.00 | 0.00 | 0.00 | 0 | 0.14 | 0.17 | 0.17 | 2 |
| P62269 | 40S ribosomal protein S18 | RPS18 | 11.18 | 2 | 17.7 | 10.99 | 0.55 | 0.33 | 0.50 | 2 | 0.00 | 0.00 | 0.00 | 0 | 0.00 | 0.17 | 0.17 | 1 | 0.00 | 0.00 | 0.00 | 0 | 0.14 | 0.13 | 0.17 | 2 |
| P50281 | Matrix metalloproteinase-14 | MMP14 | 2.41 | 1 | 65.9 | 7.77 | 0.00 | 0.17 | 0.17 | 1 | 0.00 | 0.00 | 0.00 | 0 | 0.27 | 0.33 | 0.33 | 2 | 0.00 | 0.00 | 0.00 | 0 | 0.07 | 0.13 | 0.13 | 2 |
| P38919 | Eukaryotic initiation factor 4A-III | EIF4A3 | 3.16 | 1 | 46.8 | 6.73 | 0.00 | 0.00 | 0.00 | 0 | 0.00 | 0.00 | 0.00 | 0 | 0.27 | 0.33 | 0.33 | 2 | 0.34 | 0.17 | 0.17 | 1 | 0.15 | 0.13 | 0.13 | 2 |
| O00391 | Sulfhydryl oxidase 1 | QSOX1 | 2.14 | 1 | 82.5 | 8.92 | 0.30 | 0.17 | 0.17 | 1 | 0.00 | 0.00 | 0.00 | 0 | 0.00 | 0.17 | 0.17 | 1 | 0.31 | 0.17 | 0.17 | 1 | 0.15 | 0.13 | 0.13 | 3 |
| H3BP20 | Beta-hexosaminidase | HEXA | 3.52 | 1 | 62.0 | 5.21 | 0.00 | 0.00 | 0.00 | 0 | 0.27 | 0.17 | 0.17 | 1 | 0.29 | 0.17 | 0.33 | 1 | 0.00 | 0.00 | 0.00 | 0 | 0.14 | 0.08 | 0.13 | 2 |
| Q02878 | 60S ribosomal protein L6 | RPL6 | 11.11 | 2 | 32.7 | 10.58 | 0.00 | 0.00 | 0.00 | 0 | 0.59 | 0.33 | 0.33 | 2 | 0.27 | 0.17 | 0.17 | 1 | 0.00 | 0.00 | 0.00 | 0 | 0.21 | 0.13 | 0.13 | 2 |
| Q14974 | Importin subunit beta-1 | KPNB1 | 1.71 | 1 | 97.1 | 4.78 | 0.00 | 0.17 | 0.17 | 1 | 0.28 | 0.17 | 0.17 | 1 | 0.27 | 0.17 | 0.17 | 1 | 0.00 | 0.00 | 0.00 | 0 | 0.14 | 0.13 | 0.13 | 3 |
| P18754 | Regulator of chromosome condensation | RCC1 | 6.89 | 1 | 44.9 | 7.52 | 0.00 | 0.00 | 0.00 | 0 | 0.88 | 0.33 | 0.33 | 2 | 0.41 | 0.17 | 0.17 | 1 | 0.00 | 0.00 | 0.00 | 0 | 0.32 | 0.13 | 0.13 | 2 |
| O00499 | Myc box-dependent-interacting protein 1 | BIN1 | 3.37 | 1 | 64.7 | 5.06 | 0.32 | 0.17 | 0.17 | 1 | 0.00 | 0.00 | 0.00 | 0 | 0.00 | 0.00 | 0.00 | 0 | 0.57 | 0.33 | 0.33 | 2 | 0.22 | 0.13 | 0.13 | 2 |
| Q9NXL9 | DNA helicase MCM9 | MCM9 | 2.54 | 1 | 127.2 | 7.74 | 0.00 | 0.17 | 0.17 | 1 | 0.00 | 0.00 | 0.00 | 0 | 0.36 | 0.17 | 0.17 | 1 | 0.00 | 0.17 | 0.17 | 1 | 0.09 | 0.13 | 0.13 | 3 |
| P43304 | Glycerol-3-phosphate dehydrogenase, mitochondrial | GPD2 | 3.44 | 1 | 80.8 | 7.69 | 0.00 | 0.00 | 0.00 | 0 | 0.80 | 0.17 | 0.33 | 1 | 0.00 | 0.00 | 0.00 | 0 | 0.00 | 0.17 | 0.17 | 1 | 0.20 | 0.08 | 0.13 | 2 |
| Q99471 | Prefoldin subunit 5 | PFDN5 | 11.69 | 1 | 17.3 | 6.33 | 0.00 | 0.00 | 0.00 | 0 | 0.00 | 0.17 | 0.17 | 1 | 0.30 | 0.17 | 0.17 | 1 | 0.36 | 0.17 | 0.17 | 1 | 0.17 | 0.13 | 0.13 | 3 |
| P07197 | Neurofilament medium polypeptide | NEFM | 3.82 | 2 | 102.4 | 4.91 | 0.64 | 0.33 | 0.50 | 2 | 0.00 | 0.00 | 0.00 | 0 | 0.00 | 0.00 | 0.00 | 0 | 0.00 | 0.00 | 0.00 | 0 | 0.16 | 0.08 | 0.13 | 1 |
| Q8N1K5 | Protein THEMIS | THEMIS | 2.96 | 1 | 73.4 | 5.90 | 0.35 | 0.17 | 0.17 | 1 | 0.00 | 0.17 | 0.17 | 1 | 0.00 | 0.00 | 0.00 | 0 | 0.40 | 0.17 | 0.17 | 1 | 0.19 | 0.13 | 0.13 | 3 |
| P14550 | Aldo-keto reductase family 1 member A1 | AKR1A1 | 8.00 | 2 | 36.6 | 6.79 | 0.00 | 0.17 | 0.17 | 1 | 0.00 | 0.17 | 0.17 | 1 | 0.00 | 0.00 | 0.00 | 0 | 0.28 | 0.17 | 0.17 | 1 | 0.07 | 0.13 | 0.13 | 3 |
| B4E1Z4 | cDNA FLJ55673, highly similar to Complement factor B |  | 1.11 | 1 | 140.9 | 7.18 | 0.32 | 0.33 | 0.33 | 2 | 0.31 | 0.17 | 0.17 | 1 | 0.00 | 0.00 | 0.00 | 0 | 0.00 | 0.00 | 0.00 | 0 | 0.16 | 0.13 | 0.13 | 2 |
| Q96N23 | Cilia- and flagella-associated protein 54 | CFAP54 | 2.26 | 3 | 351.7 | 8.10 | 0.00 | 0.17 | 0.17 | 1 | 0.00 | 0.00 | 0.00 | 0 | 0.00 | 0.17 | 0.17 | 1 | 0.00 | 0.17 | 0.17 | 1 | 0.00 | 0.13 | 0.13 | 3 |
| P68402 | Platelet-activating factor acetylhydrolase IB subunit beta | PAFAH1B2 | 14.41 | 2 | 25.6 | 5.92 | 0.00 | 0.00 | 0.00 | 0 | 0.59 | 0.17 | 0.33 | 1 | 0.00 | 0.00 | 0.00 | 0 | 0.41 | 0.17 | 0.17 | 1 | 0.25 | 0.08 | 0.13 | 2 |
| A0A2R8Y7X9 | Uncharacterized protein |  | 5.95 | 1 | 18.4 | 6.96 | 0.27 | 0.17 | 0.17 | 1 | 0.00 | 0.00 | 0.00 | 0 | 0.00 | 0.17 | 0.17 | 1 | 0.00 | 0.17 | 0.17 | 1 | 0.07 | 0.13 | 0.13 | 3 |
| O00264 | Membrane-associated progesterone receptor component 1 | PGRMC1 | 7.18 | 1 | 21.7 | 4.70 | 0.30 | 0.33 | 0.33 | 2 | 0.28 | 0.17 | 0.17 | 1 | 0.00 | 0.00 | 0.00 | 0 | 0.00 | 0.00 | 0.00 | 0 | 0.14 | 0.13 | 0.13 | 2 |
| Q13228 | Methanethiol oxidase | SELENBP1 | 7.84 | 2 | 52.4 | 6.37 | 0.00 | 0.00 | 0.00 | 0 | 0.28 | 0.33 | 0.33 | 2 | 0.00 | 0.00 | 0.00 | 0 | 0.00 | 0.17 | 0.17 | 1 | 0.07 | 0.13 | 0.13 | 2 |
| P62873 | Guanine nucleotide-binding protein G(I)/G(S)/G(T) subunit beta-1 | GNB1 | 3.24 | 1 | 37.4 | 6.00 | 0.00 | 0.17 | 0.33 | 1 | 0.28 | 0.17 | 0.17 | 1 | 0.00 | 0.00 | 0.00 | 0 | 0.00 | 0.00 | 0.00 | 0 | 0.07 | 0.08 | 0.13 | 2 |
| Q9C075 | Keratin, type I cytoskeletal 23 | KRT23 | 9.24 | 2 | 48.1 | 6.54 | 0.00 | 0.33 | 0.33 | 2 | 0.00 | 0.00 | 0.00 | 0 | 0.00 | 0.00 | 0.00 | 0 | 0.00 | 0.17 | 0.17 | 1 | 0.00 | 0.13 | 0.13 | 2 |
| M0QZJ5 | Calcium-binding mitochondrial carrier protein SCaMC-3 (Fragment) | SLC25A23 | 9.32 | 1 | 25.8 | 9.95 | 0.00 | 0.00 | 0.00 | 0 | 0.00 | 0.00 | 0.00 | 0 | 0.00 | 0.17 | 0.17 | 1 | 0.35 | 0.17 | 0.33 | 1 | 0.09 | 0.08 | 0.13 | 2 |
| Q13283 | Ras GTPase-activating protein-binding protein 1 | G3BP1 | 3.65 | 1 | 52.1 | 5.52 | 0.27 | 0.17 | 0.17 | 1 | 0.29 | 0.33 | 0.33 | 2 | 0.00 | 0.00 | 0.00 | 0 | 0.00 | 0.00 | 0.00 | 0 | 0.14 | 0.13 | 0.13 | 2 |
| P56192 | Methionine--tRNA ligase, cytoplasmic | MARS | 4.33 | 2 | 101.1 | 6.16 | 0.00 | 0.00 | 0.00 | 0 | 0.00 | 0.17 | 0.17 | 1 | 0.00 | 0.17 | 0.17 | 1 | 0.00 | 0.17 | 0.17 | 1 | 0.00 | 0.13 | 0.13 | 3 |
| Q03113 | Guanine nucleotide-binding protein subunit alpha-12 | GNA12 | 2.89 | 1 | 44.3 | 9.83 | 0.00 | 0.00 | 0.00 | 0 | 0.00 | 0.00 | 0.00 | 0 | 0.00 | 0.33 | 0.33 | 2 | 0.31 | 0.17 | 0.17 | 1 | 0.08 | 0.13 | 0.13 | 2 |
| P41091 | Eukaryotic translation initiation factor 2 subunit 3 | EIF2S3 | 5.93 | 1 | 51.1 | 8.40 | 0.00 | 0.00 | 0.00 | 0 | 0.38 | 0.17 | 0.33 | 1 | 0.00 | 0.00 | 0.00 | 0 | 0.00 | 0.17 | 0.17 | 1 | 0.09 | 0.08 | 0.13 | 2 |
| Q16698 | 2,4-dienoyl-CoA reductase, mitochondrial | DECR1 | 3.28 | 1 | 36.0 | 9.28 | 0.00 | 0.00 | 0.00 | 0 | 0.54 | 0.33 | 0.33 | 2 | 0.00 | 0.17 | 0.17 | 1 | 0.00 | 0.00 | 0.00 | 0 | 0.14 | 0.13 | 0.13 | 2 |
| O75533 | Splicing factor 3B subunit 1 | SF3B1 | 1.92 | 1 | 145.7 | 7.09 | 0.00 | 0.00 | 0.00 | 0 | 0.00 | 0.00 | 0.00 | 0 | 0.00 | 0.00 | 0.00 | 0 | 1.24 | 0.33 | 0.50 | 2 | 0.31 | 0.08 | 0.13 | 1 |
| P62495 | Eukaryotic peptide chain release factor subunit 1 | ETF1 | 14.42 | 3 | 49.0 | 5.71 | 0.00 | 0.00 | 0.00 | 0 | 0.63 | 0.50 | 0.50 | 2 | 0.00 | 0.00 | 0.00 | 0 | 0.00 | 0.00 | 0.00 | 0 | 0.16 | 0.13 | 0.13 | 1 |
| P00966 | Argininosuccinate synthase | ASS1 | 9.95 | 2 | 46.5 | 8.02 | 0.00 | 0.00 | 0.00 | 0 | 0.00 | 0.33 | 0.33 | 2 | 0.00 | 0.00 | 0.00 | 0 | 0.32 | 0.17 | 0.17 | 1 | 0.08 | 0.13 | 0.13 | 2 |
| Q9ULC4 | Maliant T-cell-amplified sequence 1 | MCTS1 | 20.44 | 2 | 20.5 | 8.82 | 0.00 | 0.17 | 0.17 | 1 | 0.00 | 0.17 | 0.17 | 1 | 0.00 | 0.00 | 0.00 | 0 | 0.00 | 0.17 | 0.17 | 1 | 0.00 | 0.13 | 0.13 | 3 |
| Q13217 | DnaJ homolog subfamily C member 3 | DNAJC3 | 5.95 | 1 | 57.5 | 6.15 | 0.00 | 0.00 | 0.00 | 0 | 0.00 | 0.00 | 0.00 | 0 | 1.08 | 0.33 | 0.33 | 2 | 0.46 | 0.17 | 0.17 | 1 | 0.38 | 0.13 | 0.13 | 2 |
| P37837 | Transaldolase | TALDO1 | 3.56 | 1 | 37.5 | 6.81 | 0.00 | 0.00 | 0.00 | 0 | 0.00 | 0.17 | 0.33 | 1 | 0.00 | 0.17 | 0.17 | 1 | 0.00 | 0.00 | 0.00 | 0 | 0.00 | 0.08 | 0.13 | 2 |
| P00491 | Purine nucleoside phosphorylase | PNP | 5.88 | 1 | 32.1 | 6.95 | 0.00 | 0.00 | 0.00 | 0 | 0.00 | 0.00 | 0.00 | 0 | 0.00 | 0.33 | 0.33 | 2 | 0.00 | 0.17 | 0.17 | 1 | 0.00 | 0.13 | 0.13 | 2 |
| J3KPF3 | 4F2 cell-surface antigen heavy chain | SLC3A2 | 5.55 | 2 | 68.1 | 5.05 | 0.28 | 0.33 | 0.33 | 2 | 0.00 | 0.17 | 0.17 | 1 | 0.00 | 0.00 | 0.00 | 0 | 0.00 | 0.00 | 0.00 | 0 | 0.07 | 0.13 | 0.13 | 2 |
| A0A024R571 | EH domain-containing protein 1 | EHD1 | 9.85 | 3 | 61.9 | 6.71 | 0.00 | 0.00 | 0.00 | 0 | 0.00 | 0.00 | 0.00 | 0 | 0.34 | 0.33 | 0.33 | 2 | 0.00 | 0.17 | 0.17 | 1 | 0.08 | 0.13 | 0.13 | 2 |
| Q12849 | G-rich sequence factor 1 | GRSF1 | 4.58 | 1 | 53.1 | 6.19 | 0.00 | 0.00 | 0.00 | 0 | 0.00 | 0.33 | 0.33 | 2 | 0.00 | 0.17 | 0.17 | 1 | 0.00 | 0.00 | 0.00 | 0 | 0.00 | 0.13 | 0.13 | 2 |
| Q15843 | NEDD8 | NEDD8 | 17.28 | 1 | 9.1 | 8.43 | 0.57 | 0.33 | 0.50 | 2 | 0.00 | 0.00 | 0.00 | 0 | 0.00 | 0.00 | 0.00 | 0 | 0.00 | 0.00 | 0.00 | 0 | 0.14 | 0.08 | 0.13 | 1 |
| P01008 | Antithrombin-III | SERPINC1 | 10.56 | 3 | 52.6 | 6.71 | 0.00 | 0.50 | 0.50 | 2 | 0.00 | 0.00 | 0.00 | 0 | 0.00 | 0.00 | 0.00 | 0 | 0.00 | 0.00 | 0.00 | 0 | 0.00 | 0.13 | 0.13 | 1 |
| P29373 | Cellular retinoic acid-binding protein 2 | CRABP2 | 6.52 | 1 | 15.7 | 5.40 | 0.30 | 0.33 | 0.33 | 2 | 0.00 | 0.00 | 0.00 | 0 | 0.28 | 0.17 | 0.17 | 1 | 0.00 | 0.00 | 0.00 | 0 | 0.15 | 0.13 | 0.13 | 2 |
| H7C0C1 | Uncharacterized protein (Fragment) |  | 5.79 | 1 | 26.8 | 9.45 | 0.00 | 0.00 | 0.00 | 0 | 0.00 | 0.17 | 0.17 | 1 | 0.00 | 0.00 | 0.00 | 0 | 0.38 | 0.33 | 0.33 | 2 | 0.09 | 0.13 | 0.13 | 2 |
| A0A087X0X3 | Heterogeneous nuclear ribonucleoprotein M | HNRNPM | 2.19 | 1 | 77.5 | 8.78 | 0.30 | 0.17 | 0.17 | 1 | 0.00 | 0.33 | 0.33 | 2 | 0.00 | 0.00 | 0.00 | 0 | 0.00 | 0.00 | 0.00 | 0 | 0.07 | 0.13 | 0.13 | 2 |
| Q9BTT0 | Acidic leucine-rich nuclear phosphoprotein 32 family member E | ANP32E | 6.34 | 1 | 30.7 | 3.85 | 0.31 | 0.17 | 0.17 | 1 | 0.28 | 0.17 | 0.17 | 1 | 0.00 | 0.00 | 0.00 | 0 | 0.00 | 0.17 | 0.17 | 1 | 0.15 | 0.13 | 0.13 | 3 |
| P30038 | Delta-1-pyrroline-5-carboxylate dehydrogenase, mitochondrial | ALDH4A1 | 3.37 | 1 | 61.7 | 8.07 | 0.00 | 0.00 | 0.00 | 0 | 0.00 | 0.00 | 0.00 | 0 | 0.00 | 0.00 | 0.00 | 0 | 0.94 | 0.33 | 0.50 | 2 | 0.24 | 0.08 | 0.13 | 1 |
| P08697 | Alpha-2-antiplasmin | SERPINF2 | 3.46 | 1 | 54.5 | 6.29 | 0.00 | 0.17 | 0.17 | 1 | 0.00 | 0.17 | 0.17 | 1 | 0.00 | 0.00 | 0.00 | 0 | 0.00 | 0.17 | 0.17 | 1 | 0.00 | 0.13 | 0.13 | 3 |
| Q06323 | Proteasome activator complex subunit 1 | PSME1 | 13.65 | 2 | 28.7 | 6.02 | 0.00 | 0.00 | 0.00 | 0 | 0.67 | 0.33 | 0.33 | 2 | 0.00 | 0.17 | 0.17 | 1 | 0.00 | 0.00 | 0.00 | 0 | 0.17 | 0.13 | 0.13 | 2 |
| P62942 | Peptidyl-prolyl cis-trans isomerase FKBP1A | FKBP1A | 12.96 | 1 | 11.9 | 8.16 | 0.00 | 0.17 | 0.17 | 1 | 0.00 | 0.17 | 0.17 | 1 | 0.30 | 0.17 | 0.17 | 1 | 0.00 | 0.00 | 0.00 | 0 | 0.08 | 0.13 | 0.13 | 3 |
| P02649 | Apolipoprotein E | APOE | 2.84 | 1 | 36.1 | 5.73 | 0.00 | 0.00 | 0.00 | 0 | 0.00 | 0.00 | 0.00 | 0 | 0.64 | 0.17 | 0.33 | 1 | 0.00 | 0.17 | 0.17 | 1 | 0.16 | 0.08 | 0.13 | 2 |
| P22102 | Trifunctional purine biosynthetic protein adenosine-3 | GART | 2.48 | 1 | 107.7 | 6.70 | 0.00 | 0.00 | 0.00 | 0 | 0.37 | 0.17 | 0.17 | 1 | 0.00 | 0.17 | 0.17 | 1 | 0.40 | 0.17 | 0.17 | 1 | 0.19 | 0.13 | 0.13 | 3 |
| Q15366 | Poly(rC)-binding protein 2 | PCBP2 | 8.49 | 1 | 38.6 | 6.79 | 0.00 | 0.17 | 0.17 | 1 | 0.36 | 0.17 | 0.17 | 1 | 0.00 | 0.17 | 0.17 | 1 | 0.00 | 0.00 | 0.00 | 0 | 0.09 | 0.13 | 0.13 | 3 |
| A0A3B3ITT5 | 60S ribosomal protein L29 | RPL29 | 8.98 | 1 | 18.5 | 11.55 | 0.28 | 0.17 | 0.17 | 1 | 0.00 | 0.00 | 0.00 | 0 | 0.34 | 0.17 | 0.33 | 1 | 0.00 | 0.00 | 0.00 | 0 | 0.16 | 0.08 | 0.13 | 2 |
| O00299 | Chloride intracellular channel protein 1 | CLIC1 | 7.47 | 1 | 26.9 | 5.17 | 0.00 | 0.17 | 0.17 | 1 | 0.28 | 0.17 | 0.17 | 1 | 0.27 | 0.17 | 0.17 | 1 | 0.00 | 0.00 | 0.00 | 0 | 0.14 | 0.13 | 0.13 | 3 |
| P23142 | Fibulin-1 | FBLN1 | 3.27 | 1 | 77.2 | 5.22 | 0.00 | 0.00 | 0.00 | 0 | 0.35 | 0.17 | 0.17 | 1 | 0.00 | 0.17 | 0.17 | 1 | 0.00 | 0.17 | 0.17 | 1 | 0.09 | 0.13 | 0.13 | 3 |
| P55209 | Nucleosome assembly protein 1-like 1 | NAP1L1 | 4.60 | 1 | 45.3 | 4.46 | 0.00 | 0.00 | 0.00 | 0 | 0.00 | 0.17 | 0.17 | 1 | 0.37 | 0.33 | 0.33 | 2 | 0.00 | 0.00 | 0.00 | 0 | 0.09 | 0.13 | 0.13 | 2 |
| P25311 | Zinc-alpha-2-glycoprotein | AZGP1 | 7.05 | 1 | 34.2 | 6.05 | 0.00 | 0.17 | 0.17 | 1 | 0.00 | 0.33 | 0.33 | 2 | 0.00 | 0.00 | 0.00 | 0 | 0.00 | 0.00 | 0.00 | 0 | 0.00 | 0.13 | 0.13 | 2 |
| P50990 | T-complex protein 1 subunit theta | CCT8 | 4.74 | 2 | 59.6 | 5.60 | 0.00 | 0.00 | 0.00 | 0 | 0.28 | 0.33 | 0.33 | 2 | 0.28 | 0.17 | 0.17 | 1 | 0.00 | 0.00 | 0.00 | 0 | 0.14 | 0.13 | 0.13 | 2 |
| P61586 | Transforming protein RhoA | RHOA | 21.24 | 2 | 21.8 | 6.10 | 0.00 | 0.00 | 0.00 | 0 | 0.00 | 0.17 | 0.17 | 1 | 0.37 | 0.17 | 0.17 | 1 | 0.00 | 0.17 | 0.17 | 1 | 0.09 | 0.13 | 0.13 | 3 |
| O00231 | 26S proteasome non-ATPase regulatory subunit 11 | PSMD11 | 6.87 | 2 | 47.4 | 6.48 | 0.00 | 0.00 | 0.00 | 0 | 0.27 | 0.50 | 0.50 | 3 | 0.00 | 0.00 | 0.00 | 0 | 0.00 | 0.00 | 0.00 | 0 | 0.07 | 0.13 | 0.13 | 1 |
| P21266 | Glutathione S-transferase Mu 3 | GSTM3 | 7.11 | 1 | 26.5 | 5.54 | 0.00 | 0.17 | 0.17 | 1 | 0.30 | 0.17 | 0.17 | 1 | 0.00 | 0.00 | 0.00 | 0 | 0.31 | 0.17 | 0.17 | 1 | 0.15 | 0.13 | 0.13 | 3 |
| P56537 | Eukaryotic translation initiation factor 6 | EIF6 | 9.80 | 1 | 26.6 | 4.68 | 0.00 | 0.00 | 0.00 | 0 | 0.00 | 0.00 | 0.00 | 0 | 0.00 | 0.17 | 0.17 | 1 | 0.00 | 0.33 | 0.33 | 2 | 0.00 | 0.13 | 0.13 | 2 |
| P53004 | Biliverdin reductase A | BLVRA | 8.45 | 1 | 33.4 | 6.44 | 0.00 | 0.00 | 0.00 | 0 | 0.34 | 0.17 | 0.33 | 1 | 0.00 | 0.00 | 0.00 | 0 | 0.36 | 0.17 | 0.17 | 1 | 0.17 | 0.08 | 0.13 | 2 |
| O75131 | Copine-3 | CPNE3 | 2.98 | 1 | 60.1 | 5.85 | 0.00 | 0.17 | 0.17 | 1 | 0.00 | 0.33 | 0.33 | 2 | 0.00 | 0.00 | 0.00 | 0 | 0.00 | 0.00 | 0.00 | 0 | 0.00 | 0.13 | 0.13 | 2 |
| Q9UI42 | Carboxypeptidase A4 | CPA4 | 6.18 | 1 | 47.3 | 6.70 | 0.00 | 0.00 | 0.00 | 0 | 0.00 | 0.00 | 0.00 | 0 | 0.39 | 0.50 | 0.50 | 3 | 0.00 | 0.00 | 0.00 | 0 | 0.10 | 0.13 | 0.13 | 1 |
| O15027 | Protein transport protein Sec16A | SEC16A | 1.06 | 1 | 251.7 | 5.80 | 0.00 | 0.17 | 0.17 | 1 | 0.42 | 0.17 | 0.17 | 1 | 0.00 | 0.17 | 0.17 | 1 | 0.00 | 0.00 | 0.00 | 0 | 0.10 | 0.13 | 0.13 | 3 |
| O14957 | Cytochrome b-c1 complex subunit 10 | UQCR11 | 21.43 | 1 | 6.6 | 9.88 | 0.00 | 0.00 | 0.00 | 0 | 0.59 | 0.17 | 0.33 | 1 | 0.00 | 0.17 | 0.17 | 1 | 0.00 | 0.00 | 0.00 | 0 | 0.15 | 0.08 | 0.13 | 2 |
| Q8NF37 | Lysophosphatidylcholine acyltransferase 1 | LPCAT1 | 3.56 | 1 | 59.1 | 6.02 | 0.00 | 0.00 | 0.00 | 0 | 0.35 | 0.17 | 0.33 | 1 | 0.00 | 0.00 | 0.00 | 0 | 0.00 | 0.00 | 0.00 | 0 | 0.09 | 0.04 | 0.08 | 1 |
| Q9BQS8 | FYVE and coiled-coil domain-containing protein 1 | FYCO1 | 0.95 | 1 | 166.9 | 4.92 | 0.00 | 0.00 | 0.00 | 0 | 0.00 | 0.33 | 0.33 | 2 | 0.00 | 0.00 | 0.00 | 0 | 0.00 | 0.00 | 0.00 | 0 | 0.00 | 0.08 | 0.08 | 1 |
| Q86Z14 | Beta-klotho | KLB | 1.44 | 1 | 119.7 | 9.22 | 0.00 | 0.00 | 0.00 | 0 | 0.00 | 0.17 | 0.17 | 1 | 0.00 | 0.17 | 0.17 | 1 | 0.00 | 0.00 | 0.00 | 0 | 0.00 | 0.08 | 0.08 | 2 |
| P39656 | Dolichyl-diphosphooligosaccharide--protein glycosyltransferase 48 kDa subunit | DDOST | 5.70 | 2 | 50.8 | 6.55 | 0.00 | 0.00 | 0.00 | 0 | 0.33 | 0.17 | 0.17 | 1 | 0.00 | 0.00 | 0.00 | 0 | 0.00 | 0.17 | 0.17 | 1 | 0.08 | 0.08 | 0.08 | 2 |
| Q13200 | 26S proteasome non-ATPase regulatory subunit 2 | PSMD2 | 4.63 | 2 | 100.1 | 5.20 | 0.00 | 0.00 | 0.00 | 0 | 0.00 | 0.33 | 0.33 | 2 | 0.00 | 0.00 | 0.00 | 0 | 0.00 | 0.00 | 0.00 | 0 | 0.00 | 0.08 | 0.08 | 1 |
| Q53TN4 | Cytochrome b reductase 1 | CYBRD1 | 4.20 | 1 | 31.6 | 8.76 | 0.00 | 0.17 | 0.17 | 1 | 0.00 | 0.00 | 0.00 | 0 | 0.00 | 0.00 | 0.00 | 0 | 0.31 | 0.17 | 0.17 | 1 | 0.08 | 0.08 | 0.08 | 2 |
| Q14195 | Dihydropyrimidinase-related protein 3 | DPYSL3 | 4.74 | 1 | 61.9 | 6.49 | 0.00 | 0.17 | 0.17 | 1 | 0.00 | 0.00 | 0.00 | 0 | 0.00 | 0.00 | 0.00 | 0 | 0.00 | 0.17 | 0.17 | 1 | 0.00 | 0.08 | 0.08 | 2 |
| Q8NBN7 | Retinol dehydrogenase 13 | RDH13 | 5.74 | 1 | 35.9 | 8.10 | 0.00 | 0.00 | 0.00 | 0 | 0.00 | 0.00 | 0.00 | 0 | 0.63 | 0.33 | 0.33 | 2 | 0.00 | 0.00 | 0.00 | 0 | 0.16 | 0.08 | 0.08 | 1 |
| Q9Y230 | RuvB-like 2 | RUVBL2 | 3.46 | 1 | 51.1 | 5.64 | 0.00 | 0.00 | 0.00 | 0 | 0.00 | 0.00 | 0.00 | 0 | 0.27 | 0.33 | 0.33 | 2 | 0.00 | 0.00 | 0.00 | 0 | 0.07 | 0.08 | 0.08 | 1 |
| Q9Y4G6 | Talin-2 | TLN2 | 2.01 | 2 | 271.4 | 5.57 | 0.00 | 0.00 | 0.00 | 0 | 0.00 | 0.00 | 0.00 | 0 | 0.28 | 0.17 | 0.17 | 1 | 0.00 | 0.17 | 0.17 | 1 | 0.07 | 0.08 | 0.08 | 2 |
| Q9Y6W3 | Calpain-7 | CAPN7 | 5.17 | 2 | 92.6 | 7.65 | 0.28 | 0.33 | 0.33 | 2 | 0.00 | 0.00 | 0.00 | 0 | 0.00 | 0.00 | 0.00 | 0 | 0.00 | 0.00 | 0.00 | 0 | 0.07 | 0.08 | 0.08 | 1 |
| Q573B4 | Tyrosine-protein kinase | LCK | 5.23 | 1 | 58.3 | 5.81 | 0.00 | 0.00 | 0.00 | 0 | 0.00 | 0.17 | 0.17 | 1 | 0.00 | 0.00 | 0.00 | 0 | 0.00 | 0.17 | 0.17 | 1 | 0.00 | 0.08 | 0.08 | 2 |
| P00441 | Superoxide dismutase [Cu-Zn] | SOD1 | 9.09 | 1 | 15.9 | 6.13 | 0.00 | 0.17 | 0.17 | 1 | 0.00 | 0.00 | 0.00 | 0 | 0.00 | 0.00 | 0.00 | 0 | 0.00 | 0.17 | 0.17 | 1 | 0.00 | 0.08 | 0.08 | 2 |
| O75815 | Breast cancer anti-estrogen resistance protein 3 | BCAR3 | 1.70 | 1 | 92.5 | 7.96 | 0.28 | 0.17 | 0.17 | 1 | 0.00 | 0.17 | 0.17 | 1 | 0.00 | 0.00 | 0.00 | 0 | 0.00 | 0.00 | 0.00 | 0 | 0.07 | 0.08 | 0.08 | 2 |
| P02792 | Ferritin light chain | FTL | 9.14 | 1 | 20.0 | 5.78 | 0.32 | 0.17 | 0.17 | 1 | 0.00 | 0.00 | 0.00 | 0 | 0.30 | 0.17 | 0.17 | 1 | 0.00 | 0.00 | 0.00 | 0 | 0.15 | 0.08 | 0.08 | 2 |
| P24539 | ATP synthase F(0) complex subunit B1, mitochondrial | ATP5PB | 5.86 | 1 | 28.9 | 9.36 | 0.27 | 0.17 | 0.17 | 1 | 0.00 | 0.00 | 0.00 | 0 | 0.00 | 0.00 | 0.00 | 0 | 0.00 | 0.17 | 0.17 | 1 | 0.07 | 0.08 | 0.08 | 2 |
| E7ETB3 | Aspartyl aminopeptidase, isoform CRA_c | DNPEP | 5.68 | 1 | 54.5 | 7.74 | 0.00 | 0.00 | 0.00 | 0 | 0.00 | 0.00 | 0.00 | 0 | 0.39 | 0.33 | 0.33 | 2 | 0.00 | 0.00 | 0.00 | 0 | 0.10 | 0.08 | 0.08 | 1 |
| Q9UHD8 | Septin-9 | SEPT9 | 3.07 | 1 | 65.4 | 8.97 | 0.00 | 0.00 | 0.00 | 0 | 0.00 | 0.00 | 0.00 | 0 | 0.00 | 0.33 | 0.33 | 2 | 0.00 | 0.00 | 0.00 | 0 | 0.00 | 0.08 | 0.08 | 1 |
| Q6ZSM3 | Monocarboxylate transporter 12 | SLC16A12 | 6.20 | 1 | 56.5 | 8.27 | 0.00 | 0.00 | 0.00 | 0 | 0.00 | 0.17 | 0.17 | 1 | 0.00 | 0.00 | 0.00 | 0 | 0.00 | 0.17 | 0.17 | 1 | 0.00 | 0.08 | 0.08 | 2 |
| P62888 | 60S ribosomal protein L30 | RPL30 | 10.43 | 1 | 12.8 | 9.63 | 0.00 | 0.00 | 0.00 | 0 | 0.28 | 0.17 | 0.33 | 1 | 0.00 | 0.00 | 0.00 | 0 | 0.00 | 0.00 | 0.00 | 0 | 0.07 | 0.04 | 0.08 | 1 |
| Q92982 | Ninjurin-1 | NINJ1 | 13.16 | 1 | 16.3 | 6.28 | 0.00 | 0.00 | 0.00 | 0 | 0.55 | 0.33 | 0.33 | 2 | 0.00 | 0.00 | 0.00 | 0 | 0.00 | 0.00 | 0.00 | 0 | 0.14 | 0.08 | 0.08 | 1 |
| E7EV07 | Rho guanine nucleotide exchange factor 4 | ARHGEF4 | 0.66 | 1 | 198.1 | 6.57 | 0.00 | 0.17 | 0.17 | 1 | 0.00 | 0.17 | 0.17 | 1 | 0.00 | 0.00 | 0.00 | 0 | 0.00 | 0.00 | 0.00 | 0 | 0.00 | 0.08 | 0.08 | 2 |
| A0A0G2JK23 | Large proline-rich protein BAG6 | BAG6 | 1.50 | 1 | 119.3 | 5.60 | 0.00 | 0.17 | 0.17 | 1 | 0.00 | 0.00 | 0.00 | 0 | 0.00 | 0.00 | 0.00 | 0 | 0.32 | 0.17 | 0.17 | 1 | 0.08 | 0.08 | 0.08 | 2 |
| Q6ZRS2 | Helicase SRCAP | SRCAP | 0.74 | 1 | 343.3 | 5.96 | 0.00 | 0.00 | 0.00 | 0 | 0.00 | 0.17 | 0.33 | 1 | 0.00 | 0.00 | 0.00 | 0 | 0.00 | 0.00 | 0.00 | 0 | 0.00 | 0.04 | 0.08 | 1 |
| A0A2R8YDN7 | Cation-transporting ATPase | ATP13A3 | 0.98 | 1 | 138.7 | 6.65 | 0.00 | 0.00 | 0.00 | 0 | 0.00 | 0.17 | 0.17 | 1 | 0.00 | 0.17 | 0.17 | 1 | 0.00 | 0.00 | 0.00 | 0 | 0.00 | 0.08 | 0.08 | 2 |
| Q12907 | Vesicular integral-membrane protein VIP36 | LMAN2 | 7.30 | 1 | 40.2 | 6.95 | 0.34 | 0.33 | 0.33 | 2 | 0.00 | 0.00 | 0.00 | 0 | 0.00 | 0.00 | 0.00 | 0 | 0.00 | 0.00 | 0.00 | 0 | 0.09 | 0.08 | 0.08 | 1 |
| Q9UL18 | Protein argonaute-1 | ago-01 | 5.02 | 2 | 97.2 | 9.16 | 0.00 | 0.00 | 0.00 | 0 | 0.27 | 0.17 | 0.17 | 1 | 0.37 | 0.17 | 0.17 | 1 | 0.00 | 0.00 | 0.00 | 0 | 0.16 | 0.08 | 0.08 | 2 |
| Q99973 | Telomerase protein component 1 | TEP1 | 1.41 | 2 | 290.3 | 7.97 | 0.00 | 0.00 | 0.00 | 0 | 0.28 | 0.17 | 0.17 | 1 | 0.00 | 0.00 | 0.00 | 0 | 0.00 | 0.17 | 0.17 | 1 | 0.07 | 0.08 | 0.08 | 2 |
| Q6NZI2 | Caveolae-associated protein 1 | CAVIN1 | 4.62 | 1 | 43.5 | 5.60 | 0.28 | 0.17 | 0.17 | 1 | 0.33 | 0.17 | 0.17 | 1 | 0.00 | 0.00 | 0.00 | 0 | 0.00 | 0.00 | 0.00 | 0 | 0.15 | 0.08 | 0.08 | 2 |
| O43776 | Asparagine--tRNA ligase, cytoplasmic | NARS | 6.02 | 2 | 62.9 | 6.25 | 0.00 | 0.00 | 0.00 | 0 | 0.00 | 0.00 | 0.00 | 0 | 0.00 | 0.33 | 0.33 | 2 | 0.00 | 0.00 | 0.00 | 0 | 0.00 | 0.08 | 0.08 | 1 |
| Q8WWW0 | Ras association domain-containing protein 5 | RASSF5 | 3.11 | 1 | 47.1 | 9.14 | 0.00 | 0.00 | 0.00 | 0 | 0.00 | 0.00 | 0.00 | 0 | 0.28 | 0.33 | 0.33 | 2 | 0.00 | 0.00 | 0.00 | 0 | 0.07 | 0.08 | 0.08 | 1 |
| A0A0J9YYG8 | Disks large homolog 5 (Fragment) | DLG5 | 9.36 | 2 | 63.7 | 7.94 | 0.00 | 0.00 | 0.00 | 0 | 0.00 | 0.17 | 0.17 | 1 | 0.00 | 0.17 | 0.17 | 1 | 0.00 | 0.00 | 0.00 | 0 | 0.00 | 0.08 | 0.08 | 2 |
| Q8WUD1 | Ras-related protein Rab-2B | RAB2B | 7.41 | 1 | 24.2 | 7.83 | 0.00 | 0.00 | 0.00 | 0 | 0.00 | 0.00 | 0.00 | 0 | 0.00 | 0.17 | 0.17 | 1 | 0.00 | 0.17 | 0.17 | 1 | 0.00 | 0.08 | 0.08 | 2 |
| A0A2R8YD14 | 40S ribosomal protein S24 | RPS24 | 9.09 | 1 | 19.2 | 10.98 | 0.00 | 0.00 | 0.00 | 0 | 0.27 | 0.33 | 0.33 | 2 | 0.00 | 0.00 | 0.00 | 0 | 0.00 | 0.00 | 0.00 | 0 | 0.07 | 0.08 | 0.08 | 1 |
| Q13616 | Cullin-1 | CUL1 | 2.45 | 1 | 89.6 | 8.00 | 0.00 | 0.00 | 0.00 | 0 | 0.00 | 0.00 | 0.00 | 0 | 0.00 | 0.00 | 0.00 | 0 | 0.28 | 0.33 | 0.33 | 2 | 0.07 | 0.08 | 0.08 | 1 |
| Q8NCS7 | Choline transporter-like protein 5 | SLC44A5 | 1.39 | 1 | 81.6 | 8.10 | 0.00 | 0.00 | 0.00 | 0 | 0.00 | 0.17 | 0.17 | 1 | 0.00 | 0.17 | 0.17 | 1 | 0.00 | 0.00 | 0.00 | 0 | 0.00 | 0.08 | 0.08 | 2 |
| P12004 | Proliferating cell nuclear antigen | PCNA | 11.11 | 1 | 28.8 | 4.69 | 0.00 | 0.00 | 0.00 | 0 | 0.00 | 0.00 | 0.00 | 0 | 0.00 | 0.17 | 0.33 | 1 | 0.00 | 0.00 | 0.00 | 0 | 0.00 | 0.04 | 0.08 | 1 |
| Q02750 | Dual specificity mitogen-activated protein kinase kinase 1 | MAP2K1 | 6.62 | 1 | 43.4 | 6.62 | 0.35 | 0.33 | 0.33 | 2 | 0.00 | 0.00 | 0.00 | 0 | 0.00 | 0.00 | 0.00 | 0 | 0.00 | 0.00 | 0.00 | 0 | 0.09 | 0.08 | 0.08 | 1 |
| A0A0A6YYL2 | Sulfotransferase | SULT1A4 | 6.98 | 1 | 34.8 | 5.83 | 0.00 | 0.00 | 0.00 | 0 | 0.33 | 0.33 | 0.33 | 2 | 0.00 | 0.00 | 0.00 | 0 | 0.00 | 0.00 | 0.00 | 0 | 0.08 | 0.08 | 0.08 | 1 |
| H3BS19 | Zinc finger protein 469 | ZNF469 | 0.81 | 2 | 413.0 | 7.93 | 0.00 | 0.00 | 0.00 | 0 | 0.00 | 0.17 | 0.17 | 1 | 0.00 | 0.17 | 0.17 | 1 | 0.00 | 0.00 | 0.00 | 0 | 0.00 | 0.08 | 0.08 | 2 |
| P62191 | 26S proteasome regulatory subunit 4 | PSMC1 | 3.41 | 1 | 49.2 | 6.21 | 0.31 | 0.17 | 0.17 | 1 | 0.00 | 0.00 | 0.00 | 0 | 0.27 | 0.17 | 0.17 | 1 | 0.00 | 0.00 | 0.00 | 0 | 0.15 | 0.08 | 0.08 | 2 |
| C9JY79 | Spectrin beta chain | SPTBN4 | 1.25 | 1 | 288.9 | 6.06 | 0.00 | 0.00 | 0.00 | 0 | 0.00 | 0.00 | 0.00 | 0 | 0.00 | 0.17 | 0.17 | 1 | 0.00 | 0.17 | 0.17 | 1 | 0.00 | 0.08 | 0.08 | 2 |
| O75874 | Isocitrate dehydrogenase [NADP] cytoplasmic | IDH1 | 7.00 | 2 | 46.6 | 7.01 | 0.00 | 0.00 | 0.00 | 0 | 0.00 | 0.17 | 0.17 | 1 | 0.28 | 0.17 | 0.17 | 1 | 0.00 | 0.00 | 0.00 | 0 | 0.07 | 0.08 | 0.08 | 2 |
| Q16881 | Thioredoxin reductase 1, cytoplasmic | TXNRD1 | 8.63 | 2 | 70.9 | 7.39 | 0.00 | 0.00 | 0.00 | 0 | 0.00 | 0.00 | 0.00 | 0 | 0.36 | 0.17 | 0.17 | 1 | 0.29 | 0.17 | 0.17 | 1 | 0.16 | 0.08 | 0.08 | 2 |
| P07195 | L-lactate dehydrogenase B chain | LDHB | 5.09 | 1 | 36.6 | 6.05 | 0.00 | 0.00 | 0.00 | 0 | 0.00 | 0.00 | 0.00 | 0 | 0.39 | 0.17 | 0.17 | 1 | 0.27 | 0.17 | 0.17 | 1 | 0.17 | 0.08 | 0.08 | 2 |
| P27635 | 60S ribosomal protein L10 | RPL10 | 6.07 | 1 | 24.6 | 10.08 | 0.00 | 0.00 | 0.00 | 0 | 0.00 | 0.00 | 0.00 | 0 | 0.00 | 0.00 | 0.00 | 0 | 0.62 | 0.33 | 0.33 | 2 | 0.15 | 0.08 | 0.08 | 1 |
| Q8TAA3 | Proteasome subunit alpha-type 8 | PSMA8 | 8.59 | 1 | 28.5 | 8.98 | 0.00 | 0.00 | 0.00 | 0 | 0.00 | 0.00 | 0.00 | 0 | 0.00 | 0.17 | 0.17 | 1 | 0.00 | 0.17 | 0.17 | 1 | 0.00 | 0.08 | 0.08 | 2 |
| Q9UJU6 | Drebrin-like protein | DBNL | 3.49 | 1 | 48.2 | 5.05 | 0.00 | 0.00 | 0.00 | 0 | 0.27 | 0.17 | 0.17 | 1 | 0.34 | 0.17 | 0.17 | 1 | 0.00 | 0.00 | 0.00 | 0 | 0.15 | 0.08 | 0.08 | 2 |
| Q13158 | FAS-associated death domain protein | FADD | 12.50 | 1 | 23.3 | 5.69 | 0.00 | 0.00 | 0.00 | 0 | 0.00 | 0.00 | 0.00 | 0 | 0.38 | 0.33 | 0.33 | 2 | 0.00 | 0.00 | 0.00 | 0 | 0.09 | 0.08 | 0.08 | 1 |
| Q15393 | Splicing factor 3B subunit 3 | SF3B3 | 1.23 | 1 | 135.5 | 5.26 | 0.00 | 0.00 | 0.00 | 0 | 0.00 | 0.17 | 0.17 | 1 | 0.00 | 0.17 | 0.17 | 1 | 0.00 | 0.00 | 0.00 | 0 | 0.00 | 0.08 | 0.08 | 2 |
| Q96HY6 | DDRGK domain-containing protein 1 | DDRGK1 | 5.41 | 1 | 35.6 | 5.12 | 0.00 | 0.00 | 0.00 | 0 | 0.00 | 0.00 | 0.00 | 0 | 0.27 | 0.33 | 0.33 | 2 | 0.00 | 0.00 | 0.00 | 0 | 0.07 | 0.08 | 0.08 | 1 |
| Q02818 | Nucleobindin-1 | NUCB1 | 5.42 | 1 | 53.8 | 5.25 | 0.00 | 0.00 | 0.00 | 0 | 0.00 | 0.00 | 0.00 | 0 | 0.40 | 0.17 | 0.33 | 1 | 0.00 | 0.00 | 0.00 | 0 | 0.10 | 0.04 | 0.08 | 1 |
| P51571 | Translocon-associated protein subunit delta | SSR4 | 6.36 | 1 | 19.0 | 6.15 | 0.31 | 0.33 | 0.33 | 2 | 0.00 | 0.00 | 0.00 | 0 | 0.00 | 0.00 | 0.00 | 0 | 0.00 | 0.00 | 0.00 | 0 | 0.08 | 0.08 | 0.08 | 1 |
| F8VVM2 | Phosphate carrier protein, mitochondrial | SLC25A3 | 12.65 | 2 | 36.1 | 9.26 | 0.35 | 0.17 | 0.17 | 1 | 0.00 | 0.00 | 0.00 | 0 | 0.00 | 0.17 | 0.17 | 1 | 0.00 | 0.00 | 0.00 | 0 | 0.09 | 0.08 | 0.08 | 2 |
| P15144 | Aminopeptidase N | ANPEP | 1.03 | 1 | 109.5 | 5.48 | 0.00 | 0.00 | 0.00 | 0 | 0.00 | 0.17 | 0.17 | 1 | 0.00 | 0.00 | 0.00 | 0 | 0.27 | 0.17 | 0.17 | 1 | 0.07 | 0.08 | 0.08 | 2 |
| O43175 | D-3-phosphoglycerate dehydrogenase | PHGDH | 4.13 | 1 | 56.6 | 6.71 | 0.35 | 0.33 | 0.33 | 2 | 0.00 | 0.00 | 0.00 | 0 | 0.00 | 0.00 | 0.00 | 0 | 0.00 | 0.00 | 0.00 | 0 | 0.09 | 0.08 | 0.08 | 1 |
| A0A0G2JPR0 | Complement C4-A | C4A | 1.95 | 2 | 192.8 | 7.03 | 0.40 | 0.17 | 0.17 | 1 | 0.00 | 0.00 | 0.00 | 0 | 0.00 | 0.17 | 0.17 | 1 | 0.00 | 0.00 | 0.00 | 0 | 0.10 | 0.08 | 0.08 | 2 |
| H7C0I2 | T-cell surface glycoprotein CD1b (Fragment) | CD1B | 12.20 | 1 | 27.2 | 7.68 | 0.00 | 0.17 | 0.17 | 1 | 0.00 | 0.17 | 0.17 | 1 | 0.00 | 0.00 | 0.00 | 0 | 0.00 | 0.00 | 0.00 | 0 | 0.00 | 0.08 | 0.08 | 2 |
| O15355 | Protein phosphatase 1G | PPM1G | 5.31 | 1 | 59.2 | 4.36 | 0.00 | 0.17 | 0.17 | 1 | 0.00 | 0.00 | 0.00 | 0 | 0.00 | 0.17 | 0.17 | 1 | 0.00 | 0.00 | 0.00 | 0 | 0.00 | 0.08 | 0.08 | 2 |
| A1E5M1 | Phosphodiesterase | PDE7B | 4.98 | 1 | 57.7 | 7.44 | 0.00 | 0.17 | 0.17 | 1 | 0.00 | 0.17 | 0.17 | 1 | 0.00 | 0.00 | 0.00 | 0 | 0.00 | 0.00 | 0.00 | 0 | 0.00 | 0.08 | 0.08 | 2 |
| O43819 | Protein SCO2 homolog, mitochondrial | SCO2 | 8.65 | 1 | 29.8 | 8.85 | 0.00 | 0.17 | 0.17 | 1 | 0.36 | 0.17 | 0.17 | 1 | 0.00 | 0.00 | 0.00 | 0 | 0.00 | 0.00 | 0.00 | 0 | 0.09 | 0.08 | 0.08 | 2 |
| P58546 | Myotrophin | MTPN | 17.80 | 1 | 12.9 | 5.52 | 0.00 | 0.00 | 0.00 | 0 | 0.00 | 0.00 | 0.00 | 0 | 0.00 | 0.17 | 0.17 | 1 | 0.00 | 0.17 | 0.17 | 1 | 0.00 | 0.08 | 0.08 | 2 |
| H0Y8C6 | Importin-5 (Fragment) | IPO5 | 1.27 | 1 | 123.8 | 5.06 | 0.37 | 0.17 | 0.17 | 1 | 0.00 | 0.00 | 0.00 | 0 | 0.00 | 0.17 | 0.17 | 1 | 0.00 | 0.00 | 0.00 | 0 | 0.09 | 0.08 | 0.08 | 2 |
| Q99943 | 1-acyl-sn-glycerol-3-phosphate acyltransferase alpha | AGPAT1 | 16.96 | 2 | 31.7 | 9.38 | 0.31 | 0.17 | 0.17 | 1 | 0.00 | 0.00 | 0.00 | 0 | 0.44 | 0.17 | 0.17 | 1 | 0.00 | 0.00 | 0.00 | 0 | 0.19 | 0.08 | 0.08 | 2 |
| Q9NZN4 | EH domain-containing protein 2 | EHD2 | 6.08 | 2 | 61.1 | 6.46 | 0.29 | 0.17 | 0.17 | 1 | 0.00 | 0.17 | 0.17 | 1 | 0.00 | 0.00 | 0.00 | 0 | 0.00 | 0.00 | 0.00 | 0 | 0.07 | 0.08 | 0.08 | 2 |
| Q5SSJ5 | Heterochromatin protein 1-binding protein 3 | HP1BP3 | 4.88 | 1 | 61.2 | 9.67 | 0.00 | 0.00 | 0.00 | 0 | 0.00 | 0.17 | 0.17 | 1 | 0.00 | 0.00 | 0.00 | 0 | 0.34 | 0.17 | 0.17 | 1 | 0.09 | 0.08 | 0.08 | 2 |
| A0A087X256 | WASH complex subunit 4 | WASHC4 | 2.21 | 1 | 136.4 | 7.44 | 0.00 | 0.17 | 0.17 | 1 | 0.00 | 0.17 | 0.17 | 1 | 0.00 | 0.00 | 0.00 | 0 | 0.00 | 0.00 | 0.00 | 0 | 0.00 | 0.08 | 0.08 | 2 |
| J3QS41 | Probable helicase with zinc finger domain | HELZ | 1.03 | 1 | 218.9 | 7.42 | 0.00 | 0.00 | 0.00 | 0 | 0.00 | 0.17 | 0.17 | 1 | 0.00 | 0.17 | 0.17 | 1 | 0.00 | 0.00 | 0.00 | 0 | 0.00 | 0.08 | 0.08 | 2 |
| P20591 | Interferon-induced GTP-binding protein Mx1 | MX1 | 4.23 | 2 | 75.5 | 5.83 | 0.00 | 0.00 | 0.00 | 0 | 0.00 | 0.17 | 0.17 | 1 | 0.00 | 0.17 | 0.17 | 1 | 0.00 | 0.00 | 0.00 | 0 | 0.00 | 0.08 | 0.08 | 2 |
| Q96I59 | Probable asparagine--tRNA ligase, mitochondrial | NARS2 | 5.66 | 1 | 54.1 | 7.24 | 0.34 | 0.33 | 0.33 | 2 | 0.00 | 0.00 | 0.00 | 0 | 0.00 | 0.00 | 0.00 | 0 | 0.00 | 0.00 | 0.00 | 0 | 0.09 | 0.08 | 0.08 | 1 |
| A0A0A0MT16 | ATP-binding cassette sub-family A member 13 | ABCA13 | 0.71 | 2 | 575.8 | 6.43 | 0.00 | 0.00 | 0.00 | 0 | 0.00 | 0.17 | 0.17 | 1 | 0.00 | 0.17 | 0.17 | 1 | 0.00 | 0.00 | 0.00 | 0 | 0.00 | 0.08 | 0.08 | 2 |
| Q96L21 | 60S ribosomal protein L10-like | RPL10L | 6.07 | 1 | 24.5 | 10.01 | 0.00 | 0.00 | 0.00 | 0 | 0.00 | 0.00 | 0.00 | 0 | 0.28 | 0.17 | 0.17 | 1 | 0.27 | 0.17 | 0.17 | 1 | 0.14 | 0.08 | 0.08 | 2 |
| P02689 | Myelin P2 protein | PMP2 | 9.09 | 1 | 14.9 | 9.83 | 0.00 | 0.00 | 0.00 | 0 | 0.00 | 0.33 | 0.33 | 2 | 0.00 | 0.00 | 0.00 | 0 | 0.00 | 0.00 | 0.00 | 0 | 0.00 | 0.08 | 0.08 | 1 |
| J3KPJ3 | Calcium/calmodulin-dependent protein kinase kinase 1 | CAMKK1 | 2.26 | 1 | 58.8 | 6.10 | 0.00 | 0.00 | 0.00 | 0 | 0.27 | 0.17 | 0.17 | 1 | 0.00 | 0.00 | 0.00 | 0 | 0.27 | 0.17 | 0.17 | 1 | 0.14 | 0.08 | 0.08 | 2 |
| P62195 | 26S proteasome regulatory subunit 8 | PSMC5 | 3.94 | 1 | 45.6 | 7.55 | 0.29 | 0.17 | 0.17 | 1 | 0.00 | 0.00 | 0.00 | 0 | 0.00 | 0.00 | 0.00 | 0 | 0.27 | 0.17 | 0.17 | 1 | 0.14 | 0.08 | 0.08 | 2 |
| P17174 | Aspartate aminotransferase, cytoplasmic | GOT1 | 8.72 | 2 | 46.2 | 7.01 | 0.00 | 0.00 | 0.00 | 0 | 0.35 | 0.17 | 0.17 | 1 | 0.00 | 0.00 | 0.00 | 0 | 0.00 | 0.17 | 0.17 | 1 | 0.09 | 0.08 | 0.08 | 2 |
| P04040 | Catalase | CAT | 3.61 | 1 | 59.7 | 7.39 | 0.00 | 0.17 | 0.17 | 1 | 0.00 | 0.00 | 0.00 | 0 | 0.00 | 0.00 | 0.00 | 0 | 0.00 | 0.17 | 0.17 | 1 | 0.00 | 0.08 | 0.08 | 2 |
| P08579 | U2 small nuclear ribonucleoprotein B'' | SNRPB2 | 8.44 | 1 | 25.5 | 9.72 | 0.00 | 0.00 | 0.00 | 0 | 0.00 | 0.00 | 0.00 | 0 | 0.00 | 0.33 | 0.33 | 2 | 0.00 | 0.00 | 0.00 | 0 | 0.00 | 0.08 | 0.08 | 1 |
| C9JIZ6 | Prosaposin | PSAP | 2.85 | 1 | 58.4 | 5.17 | 0.00 | 0.00 | 0.00 | 0 | 0.00 | 0.17 | 0.17 | 1 | 0.00 | 0.00 | 0.00 | 0 | 0.00 | 0.17 | 0.17 | 1 | 0.00 | 0.08 | 0.08 | 2 |
| P51148 | Ras-related protein Rab-5C | RAB5C | 11.57 | 2 | 23.5 | 8.41 | 0.00 | 0.00 | 0.00 | 0 | 0.32 | 0.17 | 0.17 | 1 | 0.00 | 0.17 | 0.17 | 1 | 0.00 | 0.00 | 0.00 | 0 | 0.08 | 0.08 | 0.08 | 2 |
| P20073 | Annexin A7 | ANXA7 | 3.28 | 1 | 52.7 | 5.68 | 0.29 | 0.17 | 0.17 | 1 | 0.00 | 0.17 | 0.17 | 1 | 0.00 | 0.00 | 0.00 | 0 | 0.00 | 0.00 | 0.00 | 0 | 0.07 | 0.08 | 0.08 | 2 |
| O75592 | E3 ubiquitin-protein ligase MYCBP2 | MYCBP2 | 0.36 | 2 | 513.3 | 7.02 | 0.00 | 0.00 | 0.00 | 0 | 0.00 | 0.00 | 0.00 | 0 | 0.27 | 0.33 | 0.33 | 2 | 0.00 | 0.00 | 0.00 | 0 | 0.07 | 0.08 | 0.08 | 1 |
| Q9NP98 | Myozenin-1 | MYOZ1 | 8.70 | 1 | 31.7 | 8.88 | 0.00 | 0.00 | 0.00 | 0 | 0.00 | 0.00 | 0.00 | 0 | 0.00 | 0.17 | 0.17 | 1 | 0.00 | 0.17 | 0.17 | 1 | 0.00 | 0.08 | 0.08 | 2 |
| P62829 | 60S ribosomal protein L23 | RPL23 | 10.71 | 1 | 14.9 | 10.51 | 0.27 | 0.17 | 0.17 | 1 | 0.27 | 0.17 | 0.17 | 1 | 0.00 | 0.00 | 0.00 | 0 | 0.00 | 0.00 | 0.00 | 0 | 0.14 | 0.08 | 0.08 | 2 |
| A0A2R8YEA1 | Tripartite motif-containing protein 66 | TRIM66 | 3.02 | 2 | 153.7 | 6.71 | 0.00 | 0.17 | 0.17 | 1 | 0.00 | 0.00 | 0.00 | 0 | 0.00 | 0.00 | 0.00 | 0 | 0.00 | 0.17 | 0.17 | 1 | 0.00 | 0.08 | 0.08 | 2 |
| C9JEJ2 | Choline-phosphate cytidylyltransferase A | PCYT1A | 4.47 | 1 | 43.2 | 8.50 | 0.00 | 0.00 | 0.00 | 0 | 0.00 | 0.00 | 0.00 | 0 | 0.28 | 0.17 | 0.17 | 1 | 0.27 | 0.17 | 0.17 | 1 | 0.14 | 0.08 | 0.08 | 2 |
| Q9Y277 | Voltage-dependent anion-selective channel protein 3 | VDAC3 | 7.07 | 1 | 30.6 | 8.66 | 0.00 | 0.00 | 0.00 | 0 | 0.00 | 0.17 | 0.17 | 1 | 0.00 | 0.00 | 0.00 | 0 | 0.00 | 0.17 | 0.17 | 1 | 0.00 | 0.08 | 0.08 | 2 |
| O43809 | Cleavage and polyadenylation specificity factor subunit 5 | NUDT21 | 12.78 | 1 | 26.2 | 8.82 | 0.00 | 0.00 | 0.00 | 0 | 0.00 | 0.17 | 0.17 | 1 | 0.37 | 0.17 | 0.17 | 1 | 0.00 | 0.00 | 0.00 | 0 | 0.09 | 0.08 | 0.08 | 2 |
| O14782 | Kinesin-like protein KIF3C | KIF3C | 4.16 | 1 | 89.4 | 8.22 | 0.00 | 0.17 | 0.17 | 1 | 0.00 | 0.17 | 0.17 | 1 | 0.00 | 0.00 | 0.00 | 0 | 0.00 | 0.00 | 0.00 | 0 | 0.00 | 0.08 | 0.08 | 2 |
| P39019 | 40S ribosomal protein S19 | RPS19 | 6.21 | 1 | 16.1 | 10.32 | 0.31 | 0.17 | 0.17 | 1 | 0.00 | 0.00 | 0.00 | 0 | 0.00 | 0.00 | 0.00 | 0 | 0.28 | 0.17 | 0.17 | 1 | 0.15 | 0.08 | 0.08 | 2 |
| O95292 | Vesicle-associated membrane protein-associated protein B/C | VAPB | 13.99 | 2 | 27.2 | 7.30 | 0.00 | 0.00 | 0.00 | 0 | 0.00 | 0.00 | 0.00 | 0 | 0.00 | 0.00 | 0.00 | 0 | 0.29 | 0.33 | 0.33 | 2 | 0.07 | 0.08 | 0.08 | 1 |
| P06703 | Protein S100-A6 | S100A6 | 31.11 | 1 | 10.2 | 5.48 | 0.00 | 0.00 | 0.00 | 0 | 0.76 | 0.33 | 0.33 | 2 | 0.00 | 0.00 | 0.00 | 0 | 0.00 | 0.00 | 0.00 | 0 | 0.19 | 0.08 | 0.08 | 1 |
| P54886 | Delta-1-pyrroline-5-carboxylate synthase | ALDH18A1 | 1.51 | 1 | 87.2 | 7.12 | 0.00 | 0.17 | 0.17 | 1 | 0.28 | 0.17 | 0.17 | 1 | 0.00 | 0.00 | 0.00 | 0 | 0.00 | 0.00 | 0.00 | 0 | 0.07 | 0.08 | 0.08 | 2 |
| O60568 | Multifunctional procollagen lysine hydroxylase and glycosyltransferase LH3 | PLOD3 | 2.03 | 1 | 84.7 | 6.05 | 0.00 | 0.00 | 0.00 | 0 | 0.00 | 0.00 | 0.00 | 0 | 0.29 | 0.17 | 0.17 | 1 | 0.31 | 0.17 | 0.17 | 1 | 0.15 | 0.08 | 0.08 | 2 |
| Q15751 | Probable E3 ubiquitin-protein ligase HERC1 | HERC1 | 1.11 | 2 | 531.9 | 6.04 | 0.00 | 0.17 | 0.17 | 1 | 0.00 | 0.00 | 0.00 | 0 | 0.00 | 0.17 | 0.17 | 1 | 0.00 | 0.00 | 0.00 | 0 | 0.00 | 0.08 | 0.08 | 2 |
| P78386 | Keratin, type II cuticular Hb5 | KRT85 | 2.17 | 1 | 55.8 | 6.55 | 0.00 | 0.17 | 0.17 | 1 | 0.29 | 0.17 | 0.17 | 1 | 0.00 | 0.00 | 0.00 | 0 | 0.00 | 0.00 | 0.00 | 0 | 0.07 | 0.08 | 0.08 | 2 |
| Q13148 | TAR DNA-binding protein 43 | TARDBP | 8.70 | 2 | 44.7 | 6.19 | 0.00 | 0.00 | 0.00 | 0 | 0.00 | 0.00 | 0.00 | 0 | 0.00 | 0.33 | 0.33 | 2 | 0.00 | 0.00 | 0.00 | 0 | 0.00 | 0.08 | 0.08 | 1 |
| Q14147 | Probable ATP-dependent RNA helicase DHX34 | DHX34 | 1.84 | 1 | 128.0 | 7.56 | 0.00 | 0.00 | 0.00 | 0 | 0.00 | 0.17 | 0.17 | 1 | 0.00 | 0.17 | 0.17 | 1 | 0.00 | 0.00 | 0.00 | 0 | 0.00 | 0.08 | 0.08 | 2 |
| Q9H4A6 | Golgi phosphoprotein 3 | GOLPH3 | 12.42 | 2 | 33.8 | 6.44 | 0.00 | 0.00 | 0.00 | 0 | 0.27 | 0.17 | 0.17 | 1 | 0.00 | 0.00 | 0.00 | 0 | 0.44 | 0.17 | 0.17 | 1 | 0.18 | 0.08 | 0.08 | 2 |
| P62913 | 60S ribosomal protein L11 | RPL11 | 22.47 | 2 | 20.2 | 9.60 | 0.00 | 0.00 | 0.00 | 0 | 0.00 | 0.00 | 0.00 | 0 | 0.00 | 0.17 | 0.17 | 1 | 0.00 | 0.17 | 0.17 | 1 | 0.00 | 0.08 | 0.08 | 2 |
| Q07864 | DNA polymerase epsilon catalytic subunit A | POLE | 1.36 | 1 | 261.4 | 6.39 | 0.00 | 0.17 | 0.17 | 1 | 0.00 | 0.00 | 0.00 | 0 | 0.00 | 0.00 | 0.00 | 0 | 0.00 | 0.17 | 0.17 | 1 | 0.00 | 0.08 | 0.08 | 2 |
| P08253 | 72 kDa type IV collagenase | MMP2 | 2.88 | 1 | 73.8 | 5.47 | 0.00 | 0.00 | 0.00 | 0 | 0.00 | 0.00 | 0.00 | 0 | 0.00 | 0.00 | 0.00 | 0 | 0.61 | 0.17 | 0.33 | 1 | 0.15 | 0.04 | 0.08 | 1 |
| P67812 | Sial peptidase complex catalytic subunit SEC11A | SEC11A | 6.15 | 1 | 20.6 | 9.48 | 0.00 | 0.00 | 0.00 | 0 | 0.31 | 0.17 | 0.17 | 1 | 0.00 | 0.17 | 0.17 | 1 | 0.00 | 0.00 | 0.00 | 0 | 0.08 | 0.08 | 0.08 | 2 |
| O75844 | CAAX prenyl protease 1 homolog | ZMPSTE24 | 5.26 | 1 | 54.8 | 7.49 | 0.00 | 0.00 | 0.00 | 0 | 0.00 | 0.00 | 0.00 | 0 | 0.00 | 0.17 | 0.17 | 1 | 0.37 | 0.17 | 0.17 | 1 | 0.09 | 0.08 | 0.08 | 2 |
| Q4LE39 | AT-rich interactive domain-containing protein 4B | ARID4B | 1.75 | 2 | 147.7 | 5.12 | 0.00 | 0.17 | 0.17 | 1 | 0.00 | 0.00 | 0.00 | 0 | 0.00 | 0.00 | 0.00 | 0 | 0.00 | 0.17 | 0.17 | 1 | 0.00 | 0.08 | 0.08 | 2 |
| E7EX17 | Eukaryotic translation initiation factor 4B | EIF4B | 4.06 | 1 | 69.7 | 5.67 | 0.00 | 0.00 | 0.00 | 0 | 0.00 | 0.17 | 0.17 | 1 | 0.40 | 0.17 | 0.17 | 1 | 0.00 | 0.00 | 0.00 | 0 | 0.10 | 0.08 | 0.08 | 2 |
| F8VXU5 | Vacuolar protein sorting-associated protein 29 | VPS29 | 10.75 | 1 | 24.0 | 8.18 | 0.00 | 0.17 | 0.17 | 1 | 0.00 | 0.00 | 0.00 | 0 | 0.37 | 0.17 | 0.17 | 1 | 0.00 | 0.00 | 0.00 | 0 | 0.09 | 0.08 | 0.08 | 2 |
| P15924 | Desmoplakin | DSP | 1.78 | 2 | 331.6 | 6.81 | 0.00 | 0.00 | 0.00 | 0 | 0.00 | 0.17 | 0.17 | 1 | 0.00 | 0.00 | 0.00 | 0 | 0.00 | 0.17 | 0.17 | 1 | 0.00 | 0.08 | 0.08 | 2 |
| P49756 | RNA-binding protein 25 | RBM25 | 2.97 | 1 | 100.1 | 6.32 | 0.00 | 0.00 | 0.00 | 0 | 0.34 | 0.17 | 0.17 | 1 | 0.38 | 0.17 | 0.17 | 1 | 0.00 | 0.00 | 0.00 | 0 | 0.18 | 0.08 | 0.08 | 2 |
| P02686 | Myelin basic protein | MBP | 3.95 | 1 | 33.1 | 9.79 | 0.40 | 0.33 | 0.33 | 2 | 0.00 | 0.00 | 0.00 | 0 | 0.00 | 0.00 | 0.00 | 0 | 0.00 | 0.00 | 0.00 | 0 | 0.10 | 0.08 | 0.08 | 1 |
| P07384 | Calpain-1 catalytic subunit | CAPN1 | 2.24 | 1 | 81.8 | 5.67 | 0.00 | 0.00 | 0.00 | 0 | 0.00 | 0.17 | 0.17 | 1 | 0.00 | 0.00 | 0.00 | 0 | 0.32 | 0.17 | 0.17 | 1 | 0.08 | 0.08 | 0.08 | 2 |
| P50991 | T-complex protein 1 subunit delta | CCT4 | 4.82 | 2 | 57.9 | 7.83 | 0.00 | 0.17 | 0.17 | 1 | 0.00 | 0.17 | 0.17 | 1 | 0.00 | 0.00 | 0.00 | 0 | 0.00 | 0.00 | 0.00 | 0 | 0.00 | 0.08 | 0.08 | 2 |
| Q9ULP0 | Protein NDRG4 | NDRG4 | 4.55 | 1 | 38.4 | 6.21 | 0.00 | 0.17 | 0.17 | 1 | 0.00 | 0.00 | 0.00 | 0 | 0.00 | 0.00 | 0.00 | 0 | 0.00 | 0.00 | 0.00 | 0 | 0.00 | 0.04 | 0.04 | 1 |
| Q9NR12 | PDZ and LIM domain protein 7 | PDLIM7 | 2.63 | 1 | 49.8 | 8.41 | 0.00 | 0.00 | 0.00 | 0 | 0.00 | 0.17 | 0.17 | 1 | 0.00 | 0.00 | 0.00 | 0 | 0.00 | 0.00 | 0.00 | 0 | 0.00 | 0.04 | 0.04 | 1 |
| Q01968 | Inositol polyphosphate 5-phosphatase OCRL-1 | OCRL | 2.00 | 1 | 104.1 | 6.55 | 0.00 | 0.00 | 0.00 | 0 | 0.00 | 0.00 | 0.00 | 0 | 0.00 | 0.00 | 0.00 | 0 | 0.27 | 0.17 | 0.17 | 1 | 0.07 | 0.04 | 0.04 | 1 |
| P0DMU2 | Putative olfactory receptor 8G3 pseudogene | OR8G3P | 6.77 | 1 | 34.5 | 7.64 | 0.00 | 0.00 | 0.00 | 0 | 0.00 | 0.00 | 0.00 | 0 | 0.00 | 0.17 | 0.17 | 1 | 0.00 | 0.00 | 0.00 | 0 | 0.00 | 0.04 | 0.04 | 1 |
| Q86UT8 | Coiled-coil domain-containing protein 84 | CCDC84 | 7.83 | 1 | 38.0 | 8.22 | 0.00 | 0.00 | 0.00 | 0 | 0.00 | 0.00 | 0.00 | 0 | 0.43 | 0.17 | 0.17 | 1 | 0.00 | 0.00 | 0.00 | 0 | 0.11 | 0.04 | 0.04 | 1 |
| P20340 | Ras-related protein Rab-6A | RAB6A | 5.29 | 1 | 23.6 | 5.54 | 0.00 | 0.00 | 0.00 | 0 | 0.00 | 0.00 | 0.00 | 0 | 0.00 | 0.00 | 0.00 | 0 | 0.30 | 0.17 | 0.17 | 1 | 0.08 | 0.04 | 0.04 | 1 |
| P0C1S8 | Wee1-like protein kinase 2 | WEE2 | 2.47 | 1 | 62.9 | 6.51 | 0.00 | 0.00 | 0.00 | 0 | 0.00 | 0.00 | 0.00 | 0 | 0.00 | 0.17 | 0.17 | 1 | 0.00 | 0.00 | 0.00 | 0 | 0.00 | 0.04 | 0.04 | 1 |
| P23526 | Adenosylhomocysteinase | AHCY | 3.24 | 1 | 47.7 | 6.34 | 0.00 | 0.00 | 0.00 | 0 | 0.00 | 0.17 | 0.17 | 1 | 0.00 | 0.00 | 0.00 | 0 | 0.00 | 0.00 | 0.00 | 0 | 0.00 | 0.04 | 0.04 | 1 |
| Q9H3M0 | Potassium voltage-gated channel subfamily F member 1 | KCNF1 | 4.86 | 1 | 55.5 | 6.30 | 0.00 | 0.00 | 0.00 | 0 | 0.00 | 0.00 | 0.00 | 0 | 0.00 | 0.17 | 0.17 | 1 | 0.00 | 0.00 | 0.00 | 0 | 0.00 | 0.04 | 0.04 | 1 |
| Q9BTV6 | Diphthine methyltransferase | DPH7 | 4.42 | 1 | 50.5 | 6.60 | 0.00 | 0.17 | 0.17 | 1 | 0.00 | 0.00 | 0.00 | 0 | 0.00 | 0.00 | 0.00 | 0 | 0.00 | 0.00 | 0.00 | 0 | 0.00 | 0.04 | 0.04 | 1 |
| P24864 | G1/S-specific cyclin-E1 | CCNE1 | 6.34 | 1 | 47.0 | 6.04 | 0.33 | 0.17 | 0.17 | 1 | 0.00 | 0.00 | 0.00 | 0 | 0.00 | 0.00 | 0.00 | 0 | 0.00 | 0.00 | 0.00 | 0 | 0.08 | 0.04 | 0.04 | 1 |
| O95373 | Importin-7 | IPO7 | 1.93 | 1 | 119.4 | 4.82 | 0.00 | 0.00 | 0.00 | 0 | 0.34 | 0.17 | 0.17 | 1 | 0.00 | 0.00 | 0.00 | 0 | 0.00 | 0.00 | 0.00 | 0 | 0.08 | 0.04 | 0.04 | 1 |
| Q9Y2E8 | Sodium/hydrogen exchanger 8 | SLC9A8 | 4.65 | 1 | 65.4 | 6.54 | 0.00 | 0.00 | 0.00 | 0 | 0.40 | 0.17 | 0.17 | 1 | 0.00 | 0.00 | 0.00 | 0 | 0.00 | 0.00 | 0.00 | 0 | 0.10 | 0.04 | 0.04 | 1 |
| A0PK11 | Clarin-2 | CLRN2 | 8.19 | 1 | 25.4 | 6.99 | 0.00 | 0.17 | 0.17 | 1 | 0.00 | 0.00 | 0.00 | 0 | 0.00 | 0.00 | 0.00 | 0 | 0.00 | 0.00 | 0.00 | 0 | 0.00 | 0.04 | 0.04 | 1 |
| A0A140TA61 | Carboxylic ester hydrolase | CES5A | 4.17 | 1 | 63.9 | 6.44 | 0.00 | 0.00 | 0.00 | 0 | 0.00 | 0.00 | 0.00 | 0 | 0.00 | 0.00 | 0.00 | 0 | 0.00 | 0.17 | 0.17 | 1 | 0.00 | 0.04 | 0.04 | 1 |
| F8W9P2 | Spermatogenesis-associated 6-like protein | SPATA6L | 7.56 | 1 | 33.5 | 9.61 | 0.00 | 0.17 | 0.17 | 1 | 0.00 | 0.00 | 0.00 | 0 | 0.00 | 0.00 | 0.00 | 0 | 0.00 | 0.00 | 0.00 | 0 | 0.00 | 0.04 | 0.04 | 1 |
| P41212 | Transcription factor ETV6 | ETV6 | 5.97 | 1 | 53.0 | 7.43 | 0.00 | 0.17 | 0.17 | 1 | 0.00 | 0.00 | 0.00 | 0 | 0.00 | 0.00 | 0.00 | 0 | 0.00 | 0.00 | 0.00 | 0 | 0.00 | 0.04 | 0.04 | 1 |
| P31213 | 3-oxo-5-alpha-steroid 4-dehydrogenase 2 | SRD5A2 | 9.06 | 1 | 28.4 | 9.39 | 0.00 | 0.00 | 0.00 | 0 | 0.00 | 0.00 | 0.00 | 0 | 0.00 | 0.17 | 0.17 | 1 | 0.00 | 0.00 | 0.00 | 0 | 0.00 | 0.04 | 0.04 | 1 |
| P47870 | Gamma-aminobutyric acid receptor subunit beta-2 | GABRB2 | 2.34 | 1 | 59.1 | 9.36 | 0.28 | 0.17 | 0.17 | 1 | 0.00 | 0.00 | 0.00 | 0 | 0.00 | 0.00 | 0.00 | 0 | 0.00 | 0.00 | 0.00 | 0 | 0.07 | 0.04 | 0.04 | 1 |
| P06756 | Integrin alpha-V | ITGAV | 2.48 | 1 | 116.0 | 5.68 | 0.00 | 0.00 | 0.00 | 0 | 0.00 | 0.00 | 0.00 | 0 | 0.00 | 0.00 | 0.00 | 0 | 0.35 | 0.17 | 0.17 | 1 | 0.09 | 0.04 | 0.04 | 1 |
| Q59EK9 | RUN domain-containing protein 3A | RUNDC3A | 5.83 | 1 | 49.7 | 5.27 | 0.00 | 0.00 | 0.00 | 0 | 0.38 | 0.17 | 0.17 | 1 | 0.00 | 0.00 | 0.00 | 0 | 0.00 | 0.00 | 0.00 | 0 | 0.10 | 0.04 | 0.04 | 1 |
| Q9Y5F0 | Protocadherin beta-13 | PCDHB13 | 3.38 | 1 | 87.5 | 4.92 | 0.00 | 0.00 | 0.00 | 0 | 0.00 | 0.00 | 0.00 | 0 | 0.00 | 0.17 | 0.17 | 1 | 0.00 | 0.00 | 0.00 | 0 | 0.00 | 0.04 | 0.04 | 1 |
| Q6ZNG9 | KRAB-A domain-containing protein 2 | KRBA2 | 4.07 | 1 | 56.2 | 5.97 | 0.00 | 0.00 | 0.00 | 0 | 0.00 | 0.00 | 0.00 | 0 | 0.00 | 0.00 | 0.00 | 0 | 0.00 | 0.17 | 0.17 | 1 | 0.00 | 0.04 | 0.04 | 1 |
| Q06033 | Inter-alpha-trypsin inhibitor heavy chain H3 | ITIH3 | 3.03 | 1 | 99.8 | 5.74 | 0.00 | 0.17 | 0.17 | 1 | 0.00 | 0.00 | 0.00 | 0 | 0.00 | 0.00 | 0.00 | 0 | 0.00 | 0.00 | 0.00 | 0 | 0.00 | 0.04 | 0.04 | 1 |
| A0A087WZQ7 | Beta-soluble NSF attachment protein | NAPB | 3.64 | 1 | 33.9 | 5.47 | 0.00 | 0.00 | 0.00 | 0 | 0.00 | 0.00 | 0.00 | 0 | 0.00 | 0.17 | 0.17 | 1 | 0.00 | 0.00 | 0.00 | 0 | 0.00 | 0.04 | 0.04 | 1 |
| Q14CB8 | Rho GTPase-activating protein 19 | ARHGAP19 | 6.28 | 1 | 55.7 | 9.36 | 0.00 | 0.17 | 0.17 | 1 | 0.00 | 0.00 | 0.00 | 0 | 0.00 | 0.00 | 0.00 | 0 | 0.00 | 0.00 | 0.00 | 0 | 0.00 | 0.04 | 0.04 | 1 |
| H0Y8R2 | Netrin receptor UNC5A | UNC5A | 2.67 | 1 | 98.8 | 6.99 | 0.00 | 0.00 | 0.00 | 0 | 0.00 | 0.00 | 0.00 | 0 | 0.00 | 0.00 | 0.00 | 0 | 0.00 | 0.17 | 0.17 | 1 | 0.00 | 0.04 | 0.04 | 1 |
| E5RIG2 | CUB and sushi domain-containing protein 1 | CSMD1 | 0.59 | 1 | 388.6 | 6.02 | 0.00 | 0.00 | 0.00 | 0 | 0.00 | 0.17 | 0.17 | 1 | 0.00 | 0.00 | 0.00 | 0 | 0.00 | 0.00 | 0.00 | 0 | 0.00 | 0.04 | 0.04 | 1 |
| Q9H446 | RWD domain-containing protein 1 | RWDD1 | 6.58 | 1 | 27.9 | 4.20 | 0.00 | 0.00 | 0.00 | 0 | 0.29 | 0.17 | 0.17 | 1 | 0.00 | 0.00 | 0.00 | 0 | 0.00 | 0.00 | 0.00 | 0 | 0.07 | 0.04 | 0.04 | 1 |
| Q16864 | V-type proton ATPase subunit F | ATP6V1F | 20.17 | 1 | 13.4 | 5.52 | 0.00 | 0.00 | 0.00 | 0 | 0.00 | 0.00 | 0.00 | 0 | 0.00 | 0.00 | 0.00 | 0 | 0.00 | 0.17 | 0.17 | 1 | 0.00 | 0.04 | 0.04 | 1 |
| Q13905 | Rap guanine nucleotide exchange factor 1 | RAPGEF1 | 1.86 | 1 | 120.5 | 5.92 | 0.00 | 0.17 | 0.17 | 1 | 0.00 | 0.00 | 0.00 | 0 | 0.00 | 0.00 | 0.00 | 0 | 0.00 | 0.00 | 0.00 | 0 | 0.00 | 0.04 | 0.04 | 1 |
| P25189 | Myelin protein P0 | MPZ | 4.03 | 1 | 27.5 | 9.54 | 0.00 | 0.17 | 0.17 | 1 | 0.00 | 0.00 | 0.00 | 0 | 0.00 | 0.00 | 0.00 | 0 | 0.00 | 0.00 | 0.00 | 0 | 0.00 | 0.04 | 0.04 | 1 |
| E5RFT4 | Phosphatidylinositol-4,5-bisphosphate 4-phosphatase (Fragment) | PIP4P2 | 12.00 | 1 | 27.3 | 8.68 | 0.00 | 0.00 | 0.00 | 0 | 0.34 | 0.17 | 0.17 | 1 | 0.00 | 0.00 | 0.00 | 0 | 0.00 | 0.00 | 0.00 | 0 | 0.09 | 0.04 | 0.04 | 1 |
| H0YMF1 | Aggrecan core protein | ACAN | 1.13 | 1 | 265.2 | 4.12 | 0.00 | 0.17 | 0.17 | 1 | 0.00 | 0.00 | 0.00 | 0 | 0.00 | 0.00 | 0.00 | 0 | 0.00 | 0.00 | 0.00 | 0 | 0.00 | 0.04 | 0.04 | 1 |
| Q96KW9 | Sperm acrosome-associated protein 7 | SPACA7 | 9.74 | 1 | 21.5 | 4.78 | 0.00 | 0.00 | 0.00 | 0 | 0.00 | 0.00 | 0.00 | 0 | 0.00 | 0.00 | 0.00 | 0 | 0.00 | 0.17 | 0.17 | 1 | 0.00 | 0.04 | 0.04 | 1 |
| Q16740 | ATP-dependent Clp protease proteolytic subunit, mitochondrial | CLPP | 5.42 | 1 | 30.2 | 8.09 | 0.00 | 0.00 | 0.00 | 0 | 0.00 | 0.00 | 0.00 | 0 | 0.00 | 0.00 | 0.00 | 0 | 0.28 | 0.17 | 0.17 | 1 | 0.07 | 0.04 | 0.04 | 1 |
| Q6ZUB1 | Spermatogenesis-associated protein 31E1 | SPATA31E1 | 0.97 | 1 | 157.0 | 9.10 | 0.00 | 0.00 | 0.00 | 0 | 0.00 | 0.00 | 0.00 | 0 | 0.00 | 0.17 | 0.17 | 1 | 0.00 | 0.00 | 0.00 | 0 | 0.00 | 0.04 | 0.04 | 1 |
| Q63HM2 | Pecanex-like protein 4 | PCNX4 | 2.13 | 1 | 132.6 | 6.29 | 0.00 | 0.00 | 0.00 | 0 | 0.00 | 0.00 | 0.00 | 0 | 0.00 | 0.00 | 0.00 | 0 | 0.00 | 0.17 | 0.17 | 1 | 0.00 | 0.04 | 0.04 | 1 |
| Q96IV0 | Peptide-N(4)-(N-acetyl-beta-glucosaminyl)asparagine amidase | NGLY1 | 1.99 | 1 | 74.3 | 6.89 | 0.00 | 0.00 | 0.00 | 0 | 0.00 | 0.00 | 0.00 | 0 | 0.00 | 0.17 | 0.17 | 1 | 0.00 | 0.00 | 0.00 | 0 | 0.00 | 0.04 | 0.04 | 1 |
| Q9Y4B4 | Helicase ARIP4 | RAD54L2 | 1.09 | 1 | 162.7 | 6.09 | 0.00 | 0.17 | 0.17 | 1 | 0.00 | 0.00 | 0.00 | 0 | 0.00 | 0.00 | 0.00 | 0 | 0.00 | 0.00 | 0.00 | 0 | 0.00 | 0.04 | 0.04 | 1 |
| Q9H665 | IGF-like family receptor 1 | IGFLR1 | 7.61 | 1 | 37.9 | 7.08 | 0.00 | 0.00 | 0.00 | 0 | 0.00 | 0.17 | 0.17 | 1 | 0.00 | 0.00 | 0.00 | 0 | 0.00 | 0.00 | 0.00 | 0 | 0.00 | 0.04 | 0.04 | 1 |
| P56715 | Oxygen-regulated protein 1 | RP1 | 0.60 | 1 | 240.5 | 5.80 | 0.00 | 0.00 | 0.00 | 0 | 0.00 | 0.17 | 0.17 | 1 | 0.00 | 0.00 | 0.00 | 0 | 0.00 | 0.00 | 0.00 | 0 | 0.00 | 0.04 | 0.04 | 1 |
| A0A1B0GVF3 | Carnitine O-palmitoyltransferase 2, mitochondrial | CPT2 | 2.54 | 1 | 75.2 | 8.50 | 0.00 | 0.00 | 0.00 | 0 | 0.00 | 0.00 | 0.00 | 0 | 0.00 | 0.00 | 0.00 | 0 | 0.00 | 0.17 | 0.17 | 1 | 0.00 | 0.04 | 0.04 | 1 |
| Q86T82 | Ubiquitin carboxyl-terminal hydrolase 37 | USP37 | 1.63 | 1 | 110.1 | 6.20 | 0.00 | 0.00 | 0.00 | 0 | 0.00 | 0.00 | 0.00 | 0 | 0.00 | 0.00 | 0.00 | 0 | 0.00 | 0.17 | 0.17 | 1 | 0.00 | 0.04 | 0.04 | 1 |
| Q93008 | Probable ubiquitin carboxyl-terminal hydrolase FAF-X | USP9X | 0.82 | 1 | 292.1 | 5.80 | 0.00 | 0.00 | 0.00 | 0 | 0.00 | 0.17 | 0.17 | 1 | 0.00 | 0.00 | 0.00 | 0 | 0.00 | 0.00 | 0.00 | 0 | 0.00 | 0.04 | 0.04 | 1 |
| Q2TBF2 | WSC domain-containing protein 2 | WSCD2 | 1.77 | 1 | 63.8 | 8.73 | 0.00 | 0.00 | 0.00 | 0 | 0.00 | 0.00 | 0.00 | 0 | 0.00 | 0.17 | 0.17 | 1 | 0.00 | 0.00 | 0.00 | 0 | 0.00 | 0.04 | 0.04 | 1 |
| Q15911 | Zinc finger homeobox protein 3 | ZFHX3 | 0.59 | 1 | 404.2 | 6.20 | 0.00 | 0.00 | 0.00 | 0 | 0.00 | 0.00 | 0.00 | 0 | 0.00 | 0.00 | 0.00 | 0 | 0.00 | 0.17 | 0.17 | 1 | 0.00 | 0.04 | 0.04 | 1 |
| Q9H9P8 | L-2-hydroxyglutarate dehydrogenase, mitochondrial | L2HGDH | 5.40 | 1 | 50.3 | 8.15 | 0.00 | 0.00 | 0.00 | 0 | 0.00 | 0.00 | 0.00 | 0 | 0.00 | 0.17 | 0.17 | 1 | 0.00 | 0.00 | 0.00 | 0 | 0.00 | 0.04 | 0.04 | 1 |
| Q86V87 | Protein FAM160B2 | FAM160B2 | 4.04 | 1 | 82.3 | 5.47 | 0.00 | 0.17 | 0.17 | 1 | 0.00 | 0.00 | 0.00 | 0 | 0.00 | 0.00 | 0.00 | 0 | 0.00 | 0.00 | 0.00 | 0 | 0.00 | 0.04 | 0.04 | 1 |
| F8W679 | Succinate dehydrogenase assembly factor 2, mitochondrial | SDHAF2 | 17.05 | 1 | 15.1 | 6.79 | 0.00 | 0.00 | 0.00 | 0 | 0.00 | 0.00 | 0.00 | 0 | 0.00 | 0.17 | 0.17 | 1 | 0.00 | 0.00 | 0.00 | 0 | 0.00 | 0.04 | 0.04 | 1 |
| Q86TJ2 | Transcriptional adapter 2-beta | TADA2B | 6.67 | 1 | 48.4 | 7.83 | 0.00 | 0.17 | 0.17 | 1 | 0.00 | 0.00 | 0.00 | 0 | 0.00 | 0.00 | 0.00 | 0 | 0.00 | 0.00 | 0.00 | 0 | 0.00 | 0.04 | 0.04 | 1 |
| O75643 | U5 small nuclear ribonucleoprotein 200 kDa helicase | SNRNP200 | 1.17 | 1 | 244.4 | 6.06 | 0.39 | 0.17 | 0.17 | 1 | 0.00 | 0.00 | 0.00 | 0 | 0.00 | 0.00 | 0.00 | 0 | 0.00 | 0.00 | 0.00 | 0 | 0.10 | 0.04 | 0.04 | 1 |
| O75391 | Sperm-associated antigen 7 | SPAG7 | 4.41 | 1 | 26.0 | 7.91 | 0.00 | 0.17 | 0.17 | 1 | 0.00 | 0.00 | 0.00 | 0 | 0.00 | 0.00 | 0.00 | 0 | 0.00 | 0.00 | 0.00 | 0 | 0.00 | 0.04 | 0.04 | 1 |
| Q96QE5 | Transcription elongation factor, mitochondrial | TEFM | 5.28 | 1 | 41.7 | 9.32 | 0.00 | 0.00 | 0.00 | 0 | 0.00 | 0.17 | 0.17 | 1 | 0.00 | 0.00 | 0.00 | 0 | 0.00 | 0.00 | 0.00 | 0 | 0.00 | 0.04 | 0.04 | 1 |
| O75161 | Nephrocystin-4 | NPHP4 | 1.82 | 1 | 157.5 | 8.13 | 0.00 | 0.00 | 0.00 | 0 | 0.00 | 0.00 | 0.00 | 0 | 0.00 | 0.17 | 0.17 | 1 | 0.00 | 0.00 | 0.00 | 0 | 0.00 | 0.04 | 0.04 | 1 |
| P55287 | Cadherin-11 | CDH11 | 1.51 | 1 | 87.9 | 4.91 | 0.00 | 0.00 | 0.00 | 0 | 0.00 | 0.00 | 0.00 | 0 | 0.00 | 0.00 | 0.00 | 0 | 0.00 | 0.17 | 0.17 | 1 | 0.00 | 0.04 | 0.04 | 1 |
| A0A087WUT6 | Eukaryotic translation initiation factor 5B | EIF5B | 1.56 | 1 | 138.6 | 5.58 | 0.00 | 0.00 | 0.00 | 0 | 0.00 | 0.00 | 0.00 | 0 | 0.00 | 0.00 | 0.00 | 0 | 0.00 | 0.17 | 0.17 | 1 | 0.00 | 0.04 | 0.04 | 1 |
| Q15198 | Platelet-derived growth factor receptor-like protein | PDGFRL | 5.33 | 1 | 41.8 | 8.50 | 0.00 | 0.00 | 0.00 | 0 | 0.35 | 0.17 | 0.17 | 1 | 0.00 | 0.00 | 0.00 | 0 | 0.00 | 0.00 | 0.00 | 0 | 0.09 | 0.04 | 0.04 | 1 |
| Q16539 | Mitogen-activated protein kinase 14 | MAPK14 | 5.56 | 1 | 41.3 | 5.78 | 0.00 | 0.00 | 0.00 | 0 | 0.28 | 0.17 | 0.17 | 1 | 0.00 | 0.00 | 0.00 | 0 | 0.00 | 0.00 | 0.00 | 0 | 0.07 | 0.04 | 0.04 | 1 |
| A0A1W2PRA6 | MHC class I polypeptide-related sequence A | MICA | 7.53 | 1 | 37.6 | 6.79 | 0.00 | 0.00 | 0.00 | 0 | 0.00 | 0.00 | 0.00 | 0 | 0.41 | 0.17 | 0.17 | 1 | 0.00 | 0.00 | 0.00 | 0 | 0.10 | 0.04 | 0.04 | 1 |
| O15143 | Actin-related protein 2/3 complex subunit 1B | ARPC1B | 3.49 | 1 | 40.9 | 8.35 | 0.00 | 0.00 | 0.00 | 0 | 0.00 | 0.00 | 0.00 | 0 | 0.00 | 0.17 | 0.17 | 1 | 0.00 | 0.00 | 0.00 | 0 | 0.00 | 0.04 | 0.04 | 1 |
| Q9BQI5 | SH3-containing GRB2-like protein 3-interacting protein 1 | SGIP1 | 3.86 | 1 | 89.1 | 8.22 | 0.35 | 0.17 | 0.17 | 1 | 0.00 | 0.00 | 0.00 | 0 | 0.00 | 0.00 | 0.00 | 0 | 0.00 | 0.00 | 0.00 | 0 | 0.09 | 0.04 | 0.04 | 1 |
| Q9P127 | Leucine zipper protein 4 | LUZP4 | 5.43 | 1 | 35.9 | 9.45 | 0.00 | 0.00 | 0.00 | 0 | 0.00 | 0.00 | 0.00 | 0 | 0.00 | 0.17 | 0.17 | 1 | 0.00 | 0.00 | 0.00 | 0 | 0.00 | 0.04 | 0.04 | 1 |
| B1AJQ6 | Syntaxin-12 (Fragment) | STX12 | 13.95 | 1 | 24.6 | 5.15 | 0.00 | 0.00 | 0.00 | 0 | 0.39 | 0.17 | 0.17 | 1 | 0.00 | 0.00 | 0.00 | 0 | 0.00 | 0.00 | 0.00 | 0 | 0.10 | 0.04 | 0.04 | 1 |
| Q8NG48 | Protein Lines homolog 1 | LINS1 | 3.43 | 1 | 85.8 | 6.52 | 0.00 | 0.00 | 0.00 | 0 | 0.00 | 0.00 | 0.00 | 0 | 0.00 | 0.17 | 0.17 | 1 | 0.00 | 0.00 | 0.00 | 0 | 0.00 | 0.04 | 0.04 | 1 |
| Q99932 | Sperm-associated antigen 8 | SPAG8 | 5.15 | 1 | 51.1 | 5.97 | 0.00 | 0.00 | 0.00 | 0 | 0.00 | 0.00 | 0.00 | 0 | 0.00 | 0.00 | 0.00 | 0 | 0.00 | 0.17 | 0.17 | 1 | 0.00 | 0.04 | 0.04 | 1 |
| Q8NES3 | Beta-1,3-N-acetylglucosaminyltransferase lunatic fringe | LFNG | 6.86 | 1 | 41.7 | 9.17 | 0.00 | 0.00 | 0.00 | 0 | 0.00 | 0.00 | 0.00 | 0 | 0.29 | 0.17 | 0.17 | 1 | 0.00 | 0.00 | 0.00 | 0 | 0.07 | 0.04 | 0.04 | 1 |
| E5KLJ9 | Dynamin-like 120 kDa protein, mitochondrial | OPA1 | 2.86 | 1 | 113.6 | 7.88 | 0.00 | 0.17 | 0.17 | 1 | 0.00 | 0.00 | 0.00 | 0 | 0.00 | 0.00 | 0.00 | 0 | 0.00 | 0.00 | 0.00 | 0 | 0.00 | 0.04 | 0.04 | 1 |
| Q68EN5 | Uncharacterized protein KIAA0895-like | KIAA0895L | 5.31 | 1 | 53.4 | 9.17 | 0.34 | 0.17 | 0.17 | 1 | 0.00 | 0.00 | 0.00 | 0 | 0.00 | 0.00 | 0.00 | 0 | 0.00 | 0.00 | 0.00 | 0 | 0.08 | 0.04 | 0.04 | 1 |
| O60346 | PH domain leucine-rich repeat-containing protein phosphatase 1 | PHLPP1 | 2.45 | 1 | 184.6 | 6.28 | 0.00 | 0.00 | 0.00 | 0 | 0.00 | 0.17 | 0.17 | 1 | 0.00 | 0.00 | 0.00 | 0 | 0.00 | 0.00 | 0.00 | 0 | 0.00 | 0.04 | 0.04 | 1 |
| Q9Y5Z9 | UbiA prenyltransferase domain-containing protein 1 | UBIAD1 | 7.40 | 1 | 36.8 | 8.15 | 0.00 | 0.00 | 0.00 | 0 | 0.00 | 0.00 | 0.00 | 0 | 0.38 | 0.17 | 0.17 | 1 | 0.00 | 0.00 | 0.00 | 0 | 0.09 | 0.04 | 0.04 | 1 |
| E9PNI7 | Poly [ADP-ribose] polymerase | PARP10 | 0.77 | 1 | 111.3 | 5.02 | 0.00 | 0.17 | 0.17 | 1 | 0.00 | 0.00 | 0.00 | 0 | 0.00 | 0.00 | 0.00 | 0 | 0.00 | 0.00 | 0.00 | 0 | 0.00 | 0.04 | 0.04 | 1 |
| O75083 | WD repeat-containing protein 1 | WDR1 | 4.13 | 1 | 66.2 | 6.65 | 0.00 | 0.00 | 0.00 | 0 | 0.00 | 0.00 | 0.00 | 0 | 0.00 | 0.17 | 0.17 | 1 | 0.00 | 0.00 | 0.00 | 0 | 0.00 | 0.04 | 0.04 | 1 |
| Q9NZS9 | Bifunctional apoptosis regulator | BFAR | 4.67 | 1 | 52.7 | 6.54 | 0.00 | 0.00 | 0.00 | 0 | 0.00 | 0.00 | 0.00 | 0 | 0.00 | 0.00 | 0.00 | 0 | 0.00 | 0.17 | 0.17 | 1 | 0.00 | 0.04 | 0.04 | 1 |
| Q8WWA1 | Transmembrane protein 40 | TMEM40 | 10.73 | 1 | 25.5 | 5.59 | 0.00 | 0.17 | 0.17 | 1 | 0.00 | 0.00 | 0.00 | 0 | 0.00 | 0.00 | 0.00 | 0 | 0.00 | 0.00 | 0.00 | 0 | 0.00 | 0.04 | 0.04 | 1 |
| Q8N635 | Meiosis-specific with OB domain-containing protein | MEIOB | 4.52 | 1 | 49.3 | 6.39 | 0.00 | 0.00 | 0.00 | 0 | 0.00 | 0.00 | 0.00 | 0 | 0.00 | 0.00 | 0.00 | 0 | 0.00 | 0.17 | 0.17 | 1 | 0.00 | 0.04 | 0.04 | 1 |
| Q9BUB7 | Transmembrane protein 70, mitochondrial | TMEM70 | 4.62 | 1 | 29.0 | 8.91 | 0.00 | 0.00 | 0.00 | 0 | 0.00 | 0.00 | 0.00 | 0 | 0.00 | 0.00 | 0.00 | 0 | 0.33 | 0.17 | 0.17 | 1 | 0.08 | 0.04 | 0.04 | 1 |
| Q8N584 | Tetratricopeptide repeat protein 39C | TTC39C | 4.80 | 1 | 65.8 | 6.99 | 0.00 | 0.00 | 0.00 | 0 | 0.35 | 0.17 | 0.17 | 1 | 0.00 | 0.00 | 0.00 | 0 | 0.00 | 0.00 | 0.00 | 0 | 0.09 | 0.04 | 0.04 | 1 |
| Q14152 | Eukaryotic translation initiation factor 3 subunit A | EIF3A | 1.01 | 1 | 166.5 | 6.79 | 0.00 | 0.00 | 0.00 | 0 | 0.00 | 0.17 | 0.17 | 1 | 0.00 | 0.00 | 0.00 | 0 | 0.00 | 0.00 | 0.00 | 0 | 0.00 | 0.04 | 0.04 | 1 |
| P36551 | Oxygen-dependent coproporphyrinogen-III oxidase, mitochondrial | CPOX | 3.52 | 1 | 50.1 | 8.25 | 0.00 | 0.00 | 0.00 | 0 | 0.00 | 0.00 | 0.00 | 0 | 0.00 | 0.17 | 0.17 | 1 | 0.00 | 0.00 | 0.00 | 0 | 0.00 | 0.04 | 0.04 | 1 |
| P08183 | Multidrug resistance protein 1 | ABCB1 | 1.33 | 1 | 141.4 | 9.00 | 0.00 | 0.17 | 0.17 | 1 | 0.00 | 0.00 | 0.00 | 0 | 0.00 | 0.00 | 0.00 | 0 | 0.00 | 0.00 | 0.00 | 0 | 0.00 | 0.04 | 0.04 | 1 |
| Q7Z5Q5 | DNA polymerase nu | POLN | 2.11 | 1 | 100.2 | 8.29 | 0.00 | 0.00 | 0.00 | 0 | 0.00 | 0.00 | 0.00 | 0 | 0.00 | 0.00 | 0.00 | 0 | 0.00 | 0.17 | 0.17 | 1 | 0.00 | 0.04 | 0.04 | 1 |
| B4DUC8 | S-methyl-5'-thioadenosine phosphorylase | MTAP | 7.67 | 1 | 33.2 | 7.46 | 0.00 | 0.00 | 0.00 | 0 | 0.00 | 0.00 | 0.00 | 0 | 0.34 | 0.17 | 0.17 | 1 | 0.00 | 0.00 | 0.00 | 0 | 0.09 | 0.04 | 0.04 | 1 |
| Q9BQI4 | Coiled-coil domain-containing protein 3 | CCDC3 | 11.48 | 1 | 30.7 | 8.69 | 0.00 | 0.00 | 0.00 | 0 | 0.00 | 0.00 | 0.00 | 0 | 0.00 | 0.17 | 0.17 | 1 | 0.00 | 0.00 | 0.00 | 0 | 0.00 | 0.04 | 0.04 | 1 |
| Q6ZMQ8 | Serine/threonine-protein kinase LMTK1 | AATK | 1.82 | 1 | 144.5 | 4.56 | 0.00 | 0.00 | 0.00 | 0 | 0.35 | 0.17 | 0.17 | 1 | 0.00 | 0.00 | 0.00 | 0 | 0.00 | 0.00 | 0.00 | 0 | 0.09 | 0.04 | 0.04 | 1 |
| Q9UGN4 | CMRF35-like molecule 8 | CD300A | 9.36 | 1 | 33.2 | 5.49 | 0.00 | 0.00 | 0.00 | 0 | 0.00 | 0.17 | 0.17 | 1 | 0.00 | 0.00 | 0.00 | 0 | 0.00 | 0.00 | 0.00 | 0 | 0.00 | 0.04 | 0.04 | 1 |
| Q9Y5S2 | Serine/threonine-protein kinase MRCK beta | CDC42BPB | 0.94 | 1 | 194.2 | 6.37 | 0.00 | 0.17 | 0.17 | 1 | 0.00 | 0.00 | 0.00 | 0 | 0.00 | 0.00 | 0.00 | 0 | 0.00 | 0.00 | 0.00 | 0 | 0.00 | 0.04 | 0.04 | 1 |
| P04181 | Ornithine aminotransferase, mitochondrial | OAT | 4.56 | 1 | 48.5 | 7.03 | 0.00 | 0.00 | 0.00 | 0 | 0.46 | 0.17 | 0.17 | 1 | 0.00 | 0.00 | 0.00 | 0 | 0.00 | 0.00 | 0.00 | 0 | 0.12 | 0.04 | 0.04 | 1 |
| Q9NVH1 | DnaJ homolog subfamily C member 11 | DNAJC11 | 3.58 | 1 | 63.2 | 8.40 | 0.00 | 0.00 | 0.00 | 0 | 0.00 | 0.00 | 0.00 | 0 | 0.00 | 0.00 | 0.00 | 0 | 0.29 | 0.17 | 0.17 | 1 | 0.07 | 0.04 | 0.04 | 1 |
| P23284 | Peptidyl-prolyl cis-trans isomerase B | PPIB | 6.02 | 1 | 23.7 | 9.41 | 0.00 | 0.00 | 0.00 | 0 | 0.00 | 0.00 | 0.00 | 0 | 0.00 | 0.17 | 0.17 | 1 | 0.00 | 0.00 | 0.00 | 0 | 0.00 | 0.04 | 0.04 | 1 |
| B0YIW2 | Apolipoprotein C-III variant 1 | APOC3 | 13.68 | 1 | 12.8 | 8.18 | 0.00 | 0.00 | 0.00 | 0 | 0.27 | 0.17 | 0.17 | 1 | 0.00 | 0.00 | 0.00 | 0 | 0.00 | 0.00 | 0.00 | 0 | 0.07 | 0.04 | 0.04 | 1 |
| Q92502 | StAR-related lipid transfer protein 8 | STARD8 | 2.44 | 1 | 112.5 | 6.27 | 0.00 | 0.17 | 0.17 | 1 | 0.00 | 0.00 | 0.00 | 0 | 0.00 | 0.00 | 0.00 | 0 | 0.00 | 0.00 | 0.00 | 0 | 0.00 | 0.04 | 0.04 | 1 |
| O15164 | Transcription intermediary factor 1-alpha | TRIM24 | 1.62 | 1 | 116.8 | 7.11 | 0.00 | 0.00 | 0.00 | 0 | 0.00 | 0.17 | 0.17 | 1 | 0.00 | 0.00 | 0.00 | 0 | 0.00 | 0.00 | 0.00 | 0 | 0.00 | 0.04 | 0.04 | 1 |
| Q7Z7G8 | Vacuolar protein sorting-associated protein 13B | VPS13B | 0.37 | 1 | 448.4 | 6.46 | 0.00 | 0.00 | 0.00 | 0 | 0.00 | 0.00 | 0.00 | 0 | 0.00 | 0.17 | 0.17 | 1 | 0.00 | 0.00 | 0.00 | 0 | 0.00 | 0.04 | 0.04 | 1 |
| P29074 | Tyrosine-protein phosphatase non-receptor type 4 | PTPN4 | 3.67 | 1 | 105.8 | 7.44 | 0.00 | 0.17 | 0.17 | 1 | 0.00 | 0.00 | 0.00 | 0 | 0.00 | 0.00 | 0.00 | 0 | 0.00 | 0.00 | 0.00 | 0 | 0.00 | 0.04 | 0.04 | 1 |
| Q8NBT2 | Kinetochore protein Spc24 | SPC24 | 12.69 | 1 | 22.5 | 4.70 | 0.41 | 0.17 | 0.17 | 1 | 0.00 | 0.00 | 0.00 | 0 | 0.00 | 0.00 | 0.00 | 0 | 0.00 | 0.00 | 0.00 | 0 | 0.10 | 0.04 | 0.04 | 1 |
| P06400 | Retinoblastoma-associated protein | RB1 | 2.69 | 1 | 106.1 | 7.94 | 0.00 | 0.17 | 0.17 | 1 | 0.00 | 0.00 | 0.00 | 0 | 0.00 | 0.00 | 0.00 | 0 | 0.00 | 0.00 | 0.00 | 0 | 0.00 | 0.04 | 0.04 | 1 |
| Q92598 | Heat shock protein 105 kDa | HSPH1 | 2.56 | 1 | 96.8 | 5.39 | 0.00 | 0.00 | 0.00 | 0 | 0.00 | 0.00 | 0.00 | 0 | 0.34 | 0.17 | 0.17 | 1 | 0.00 | 0.00 | 0.00 | 0 | 0.09 | 0.04 | 0.04 | 1 |
| A0A0G2JLS1 | Leucine-rich repeat-containing protein 56 | LRRC56 | 4.24 | 1 | 58.6 | 7.74 | 0.00 | 0.00 | 0.00 | 0 | 0.00 | 0.00 | 0.00 | 0 | 0.00 | 0.17 | 0.17 | 1 | 0.00 | 0.00 | 0.00 | 0 | 0.00 | 0.04 | 0.04 | 1 |
| P40222 | Alpha-taxilin | TXLNA | 5.31 | 1 | 61.9 | 6.52 | 0.00 | 0.00 | 0.00 | 0 | 0.00 | 0.00 | 0.00 | 0 | 0.00 | 0.17 | 0.17 | 1 | 0.00 | 0.00 | 0.00 | 0 | 0.00 | 0.04 | 0.04 | 1 |
| Q9UHX1 | Poly(U)-binding-splicing factor PUF60 | PUF60 | 2.86 | 1 | 59.8 | 5.29 | 0.00 | 0.00 | 0.00 | 0 | 0.00 | 0.00 | 0.00 | 0 | 0.27 | 0.17 | 0.17 | 1 | 0.00 | 0.00 | 0.00 | 0 | 0.07 | 0.04 | 0.04 | 1 |
| Q14980 | Nuclear mitotic apparatus protein 1 | NUMA1 | 1.42 | 1 | 238.1 | 5.78 | 0.00 | 0.00 | 0.00 | 0 | 0.00 | 0.00 | 0.00 | 0 | 0.51 | 0.17 | 0.17 | 1 | 0.00 | 0.00 | 0.00 | 0 | 0.13 | 0.04 | 0.04 | 1 |
| O15144 | Actin-related protein 2/3 complex subunit 2 | ARPC2 | 9.33 | 1 | 34.3 | 7.36 | 0.00 | 0.17 | 0.17 | 1 | 0.00 | 0.00 | 0.00 | 0 | 0.00 | 0.00 | 0.00 | 0 | 0.00 | 0.00 | 0.00 | 0 | 0.00 | 0.04 | 0.04 | 1 |
| Q96CN7 | Isochorismatase domain-containing protein 1 | ISOC1 | 6.38 | 1 | 32.2 | 7.39 | 0.00 | 0.00 | 0.00 | 0 | 0.00 | 0.00 | 0.00 | 0 | 0.30 | 0.17 | 0.17 | 1 | 0.00 | 0.00 | 0.00 | 0 | 0.08 | 0.04 | 0.04 | 1 |
| H0YNJ6 | GMP reductase | GMPR2 | 6.79 | 1 | 46.9 | 8.51 | 0.00 | 0.00 | 0.00 | 0 | 0.00 | 0.17 | 0.17 | 1 | 0.00 | 0.00 | 0.00 | 0 | 0.00 | 0.00 | 0.00 | 0 | 0.00 | 0.04 | 0.04 | 1 |
| H0Y849 | Actin-related protein 8 (Fragment) | ACTR8 | 5.03 | 1 | 42.5 | 6.71 | 0.00 | 0.00 | 0.00 | 0 | 0.00 | 0.00 | 0.00 | 0 | 0.00 | 0.17 | 0.17 | 1 | 0.00 | 0.00 | 0.00 | 0 | 0.00 | 0.04 | 0.04 | 1 |
| Q9NX45 | Spermatogenesis- and oogenesis-specific basic helix-loop-helix-containing protein 2 | SOHLH2 | 4.00 | 1 | 46.9 | 7.17 | 0.00 | 0.17 | 0.17 | 1 | 0.00 | 0.00 | 0.00 | 0 | 0.00 | 0.00 | 0.00 | 0 | 0.00 | 0.00 | 0.00 | 0 | 0.00 | 0.04 | 0.04 | 1 |
| Q15124 | Phosphoglucomutase-like protein 5 | PGM5 | 2.65 | 1 | 62.2 | 7.21 | 0.29 | 0.17 | 0.17 | 1 | 0.00 | 0.00 | 0.00 | 0 | 0.00 | 0.00 | 0.00 | 0 | 0.00 | 0.00 | 0.00 | 0 | 0.07 | 0.04 | 0.04 | 1 |
| Q96JM7 | Lethal(3)maliant brain tumor-like protein 3 | L3MBTL3 | 3.72 | 1 | 88.3 | 6.46 | 0.00 | 0.00 | 0.00 | 0 | 0.00 | 0.00 | 0.00 | 0 | 0.00 | 0.00 | 0.00 | 0 | 0.00 | 0.17 | 0.17 | 1 | 0.00 | 0.04 | 0.04 | 1 |
| Q12768 | WASH complex subunit 5 | WASHC5 | 2.07 | 1 | 134.2 | 6.98 | 0.00 | 0.00 | 0.00 | 0 | 0.00 | 0.00 | 0.00 | 0 | 0.00 | 0.17 | 0.17 | 1 | 0.00 | 0.00 | 0.00 | 0 | 0.00 | 0.04 | 0.04 | 1 |
| Q9UQ16 | Dynamin-3 | DNM3 | 1.73 | 1 | 97.7 | 8.35 | 0.00 | 0.00 | 0.00 | 0 | 0.29 | 0.17 | 0.17 | 1 | 0.00 | 0.00 | 0.00 | 0 | 0.00 | 0.00 | 0.00 | 0 | 0.07 | 0.04 | 0.04 | 1 |
| A0A0A0MQT0 | Retinol binding protein 1, cellular | RBP1 | 8.12 | 1 | 22.3 | 6.13 | 0.00 | 0.00 | 0.00 | 0 | 0.00 | 0.00 | 0.00 | 0 | 0.00 | 0.00 | 0.00 | 0 | 0.28 | 0.17 | 0.17 | 1 | 0.07 | 0.04 | 0.04 | 1 |
| P22087 | rRNA 2'-O-methyltransferase fibrillarin | FBL | 10.28 | 1 | 33.8 | 10.18 | 0.00 | 0.00 | 0.00 | 0 | 0.00 | 0.00 | 0.00 | 0 | 0.38 | 0.17 | 0.17 | 1 | 0.00 | 0.00 | 0.00 | 0 | 0.09 | 0.04 | 0.04 | 1 |
| P04114 | Apolipoprotein B-100 | APOB | 0.55 | 1 | 515.3 | 7.05 | 0.00 | 0.00 | 0.00 | 0 | 0.00 | 0.17 | 0.17 | 1 | 0.00 | 0.00 | 0.00 | 0 | 0.00 | 0.00 | 0.00 | 0 | 0.00 | 0.04 | 0.04 | 1 |
| Q96II5 | ARAF protein | ARAF | 4.11 | 1 | 67.9 | 9.09 | 0.00 | 0.17 | 0.17 | 1 | 0.00 | 0.00 | 0.00 | 0 | 0.00 | 0.00 | 0.00 | 0 | 0.00 | 0.00 | 0.00 | 0 | 0.00 | 0.04 | 0.04 | 1 |
| Q15417 | Calponin-3 | CNN3 | 5.78 | 1 | 36.4 | 6.05 | 0.00 | 0.00 | 0.00 | 0 | 0.00 | 0.00 | 0.00 | 0 | 0.28 | 0.17 | 0.17 | 1 | 0.00 | 0.00 | 0.00 | 0 | 0.07 | 0.04 | 0.04 | 1 |
| Q02978 | Mitochondrial 2-oxoglutarate/malate carrier protein | SLC25A11 | 7.01 | 1 | 34.0 | 9.91 | 0.00 | 0.00 | 0.00 | 0 | 0.00 | 0.00 | 0.00 | 0 | 0.28 | 0.17 | 0.17 | 1 | 0.00 | 0.00 | 0.00 | 0 | 0.07 | 0.04 | 0.04 | 1 |
| Q5T124 | UBX domain-containing protein 11 | UBXN11 | 4.23 | 1 | 57.3 | 5.19 | 0.00 | 0.17 | 0.17 | 1 | 0.00 | 0.00 | 0.00 | 0 | 0.00 | 0.00 | 0.00 | 0 | 0.00 | 0.00 | 0.00 | 0 | 0.00 | 0.04 | 0.04 | 1 |
| O43592 | Exportin-T | XPOT | 1.56 | 1 | 109.9 | 5.39 | 0.00 | 0.00 | 0.00 | 0 | 0.00 | 0.00 | 0.00 | 0 | 0.00 | 0.17 | 0.17 | 1 | 0.00 | 0.00 | 0.00 | 0 | 0.00 | 0.04 | 0.04 | 1 |
| Q9NZN8 | CCR4-NOT transcription complex subunit 2 | CNOT2 | 4.81 | 1 | 59.7 | 7.66 | 0.00 | 0.00 | 0.00 | 0 | 0.00 | 0.00 | 0.00 | 0 | 0.00 | 0.17 | 0.17 | 1 | 0.00 | 0.00 | 0.00 | 0 | 0.00 | 0.04 | 0.04 | 1 |
| A0A0U1RQJ2 | Dystonin (Fragment) | DST | 1.61 | 1 | 190.2 | 5.06 | 0.00 | 0.00 | 0.00 | 0 | 0.00 | 0.00 | 0.00 | 0 | 0.00 | 0.00 | 0.00 | 0 | 0.00 | 0.17 | 0.17 | 1 | 0.00 | 0.04 | 0.04 | 1 |
| Q8N309 | Leucine-rich repeat-containing protein 43 | LRRC43 | 4.88 | 1 | 73.0 | 5.24 | 0.00 | 0.00 | 0.00 | 0 | 0.00 | 0.00 | 0.00 | 0 | 0.00 | 0.00 | 0.00 | 0 | 0.00 | 0.17 | 0.17 | 1 | 0.00 | 0.04 | 0.04 | 1 |
| Q9BVC3 | Sister chromatid cohesion protein DCC1 | DSCC1 | 4.33 | 1 | 44.8 | 5.17 | 0.00 | 0.00 | 0.00 | 0 | 0.00 | 0.00 | 0.00 | 0 | 0.31 | 0.17 | 0.17 | 1 | 0.00 | 0.00 | 0.00 | 0 | 0.08 | 0.04 | 0.04 | 1 |
| Q15391 | P2Y purinoceptor 14 | P2RY14 | 7.10 | 1 | 38.9 | 9.47 | 0.00 | 0.00 | 0.00 | 0 | 0.00 | 0.00 | 0.00 | 0 | 0.00 | 0.17 | 0.17 | 1 | 0.00 | 0.00 | 0.00 | 0 | 0.00 | 0.04 | 0.04 | 1 |
| Q5K651 | Sterile alpha motif domain-containing protein 9 | SAMD9 | 1.32 | 1 | 184.2 | 7.83 | 0.00 | 0.17 | 0.17 | 1 | 0.00 | 0.00 | 0.00 | 0 | 0.00 | 0.00 | 0.00 | 0 | 0.00 | 0.00 | 0.00 | 0 | 0.00 | 0.04 | 0.04 | 1 |
| Q9H1P3 | Oxysterol-binding protein-related protein 2 | OSBPL2 | 6.88 | 1 | 55.2 | 6.35 | 0.00 | 0.00 | 0.00 | 0 | 0.00 | 0.00 | 0.00 | 0 | 0.00 | 0.00 | 0.00 | 0 | 0.00 | 0.17 | 0.17 | 1 | 0.00 | 0.04 | 0.04 | 1 |
| J3QS68 | E3 ubiquitin-protein ligase RNF135 (Fragment) | RNF135 | 12.66 | 1 | 17.4 | 7.93 | 0.00 | 0.00 | 0.00 | 0 | 0.00 | 0.00 | 0.00 | 0 | 0.00 | 0.00 | 0.00 | 0 | 0.00 | 0.17 | 0.17 | 1 | 0.00 | 0.04 | 0.04 | 1 |
| Q8N142 | Adenylosuccinate synthetase isozyme 1 | ADSSL1 | 4.16 | 1 | 50.2 | 8.59 | 0.00 | 0.00 | 0.00 | 0 | 0.00 | 0.00 | 0.00 | 0 | 0.00 | 0.17 | 0.17 | 1 | 0.00 | 0.00 | 0.00 | 0 | 0.00 | 0.04 | 0.04 | 1 |
| Q9BYD1 | 39S ribosomal protein L13, mitochondrial | MRPL13 | 7.30 | 1 | 20.7 | 9.16 | 0.00 | 0.17 | 0.17 | 1 | 0.00 | 0.00 | 0.00 | 0 | 0.00 | 0.00 | 0.00 | 0 | 0.00 | 0.00 | 0.00 | 0 | 0.00 | 0.04 | 0.04 | 1 |
| Q9NZH4 | Putative pituitary tumor-transforming gene 3 protein | PTTG3P | 13.37 | 1 | 22.1 | 5.71 | 0.00 | 0.00 | 0.00 | 0 | 0.00 | 0.00 | 0.00 | 0 | 0.00 | 0.00 | 0.00 | 0 | 0.37 | 0.17 | 0.17 | 1 | 0.09 | 0.04 | 0.04 | 1 |
| H7C2F1 | Protein SFI1 homolog (Fragment) | SFI1 | 5.93 | 1 | 57.2 | 10.59 | 0.00 | 0.00 | 0.00 | 0 | 0.42 | 0.17 | 0.17 | 1 | 0.00 | 0.00 | 0.00 | 0 | 0.00 | 0.00 | 0.00 | 0 | 0.11 | 0.04 | 0.04 | 1 |
| P19652 | Alpha-1-acid glycoprotein 2 | ORM2 | 7.46 | 1 | 23.6 | 5.11 | 0.00 | 0.17 | 0.17 | 1 | 0.00 | 0.00 | 0.00 | 0 | 0.00 | 0.00 | 0.00 | 0 | 0.00 | 0.00 | 0.00 | 0 | 0.00 | 0.04 | 0.04 | 1 |
| P18124 | 60S ribosomal protein L7 | RPL7 | 4.44 | 1 | 29.2 | 10.65 | 0.00 | 0.00 | 0.00 | 0 | 0.00 | 0.00 | 0.00 | 0 | 0.00 | 0.00 | 0.00 | 0 | 0.00 | 0.17 | 0.17 | 1 | 0.00 | 0.04 | 0.04 | 1 |
| P05067 | Amyloid-beta precursor protein | APP | 3.64 | 1 | 86.9 | 4.82 | 0.00 | 0.00 | 0.00 | 0 | 0.00 | 0.00 | 0.00 | 0 | 0.00 | 0.00 | 0.00 | 0 | 0.00 | 0.17 | 0.17 | 1 | 0.00 | 0.04 | 0.04 | 1 |
| Q9BQG0 | Myb-binding protein 1A | MYBBP1A | 1.43 | 1 | 148.8 | 9.28 | 0.00 | 0.00 | 0.00 | 0 | 0.00 | 0.00 | 0.00 | 0 | 0.30 | 0.17 | 0.17 | 1 | 0.00 | 0.00 | 0.00 | 0 | 0.08 | 0.04 | 0.04 | 1 |
| Q5VX71 | Sushi domain-containing protein 4 | SUSD4 | 5.51 | 1 | 53.7 | 4.94 | 0.00 | 0.00 | 0.00 | 0 | 0.00 | 0.00 | 0.00 | 0 | 0.00 | 0.17 | 0.17 | 1 | 0.00 | 0.00 | 0.00 | 0 | 0.00 | 0.04 | 0.04 | 1 |
| Q9HCP6 | Protein-cysteine N-palmitoyltransferase HHAT-like protein | HHATL | 3.97 | 1 | 56.7 | 7.12 | 0.00 | 0.00 | 0.00 | 0 | 0.00 | 0.00 | 0.00 | 0 | 0.00 | 0.00 | 0.00 | 0 | 0.00 | 0.17 | 0.17 | 1 | 0.00 | 0.04 | 0.04 | 1 |
| Q96PQ0 | VPS10 domain-containing receptor SorCS2 | SORCS2 | 2.50 | 1 | 128.1 | 7.08 | 0.36 | 0.17 | 0.17 | 1 | 0.00 | 0.00 | 0.00 | 0 | 0.00 | 0.00 | 0.00 | 0 | 0.00 | 0.00 | 0.00 | 0 | 0.09 | 0.04 | 0.04 | 1 |
| B0QY89 | Eukaryotic translation initiation factor 3 subunit L | EIF3L | 2.14 | 1 | 70.9 | 6.65 | 0.00 | 0.00 | 0.00 | 0 | 0.28 | 0.17 | 0.17 | 1 | 0.00 | 0.00 | 0.00 | 0 | 0.00 | 0.00 | 0.00 | 0 | 0.07 | 0.04 | 0.04 | 1 |
| Q9UKW4 | Guanine nucleotide exchange factor VAV3 | VAV3 | 1.06 | 1 | 97.7 | 7.05 | 0.00 | 0.00 | 0.00 | 0 | 0.00 | 0.00 | 0.00 | 0 | 0.00 | 0.00 | 0.00 | 0 | 0.00 | 0.17 | 0.17 | 1 | 0.00 | 0.04 | 0.04 | 1 |
| P41250 | Glycine--tRNA ligase | GARS | 2.57 | 1 | 83.1 | 7.03 | 0.00 | 0.00 | 0.00 | 0 | 0.00 | 0.17 | 0.17 | 1 | 0.00 | 0.00 | 0.00 | 0 | 0.00 | 0.00 | 0.00 | 0 | 0.00 | 0.04 | 0.04 | 1 |
| O75340 | Programmed cell death protein 6 | PDCD6 | 6.81 | 1 | 21.9 | 5.40 | 0.00 | 0.00 | 0.00 | 0 | 0.00 | 0.17 | 0.17 | 1 | 0.00 | 0.00 | 0.00 | 0 | 0.00 | 0.00 | 0.00 | 0 | 0.00 | 0.04 | 0.04 | 1 |
| Q9HB63 | Netrin-4 | NTN4 | 3.34 | 1 | 70.0 | 8.05 | 0.00 | 0.00 | 0.00 | 0 | 0.00 | 0.00 | 0.00 | 0 | 0.00 | 0.17 | 0.17 | 1 | 0.00 | 0.00 | 0.00 | 0 | 0.00 | 0.04 | 0.04 | 1 |
| Q5T4S7 | E3 ubiquitin-protein ligase UBR4 | UBR4 | 0.23 | 1 | 573.5 | 6.04 | 0.00 | 0.17 | 0.17 | 1 | 0.00 | 0.00 | 0.00 | 0 | 0.00 | 0.00 | 0.00 | 0 | 0.00 | 0.00 | 0.00 | 0 | 0.00 | 0.04 | 0.04 | 1 |
| Q8IZS8 | Voltage-dependent calcium channel subunit alpha-2/delta-3 | CACNA2D3 | 2.38 | 1 | 122.9 | 5.78 | 0.00 | 0.00 | 0.00 | 0 | 0.00 | 0.17 | 0.17 | 1 | 0.00 | 0.00 | 0.00 | 0 | 0.00 | 0.00 | 0.00 | 0 | 0.00 | 0.04 | 0.04 | 1 |
| Q14CX7 | N-alpha-acetyltransferase 25, NatB auxiliary subunit | NAA25 | 2.26 | 1 | 112.2 | 6.64 | 0.00 | 0.00 | 0.00 | 0 | 0.00 | 0.00 | 0.00 | 0 | 0.00 | 0.00 | 0.00 | 0 | 0.00 | 0.17 | 0.17 | 1 | 0.00 | 0.04 | 0.04 | 1 |
| Q9Y2I7 | 1-phosphatidylinositol 3-phosphate 5-kinase | PIKFYVE | 1.29 | 1 | 237.0 | 6.70 | 0.00 | 0.00 | 0.00 | 0 | 0.00 | 0.00 | 0.00 | 0 | 0.00 | 0.17 | 0.17 | 1 | 0.00 | 0.00 | 0.00 | 0 | 0.00 | 0.04 | 0.04 | 1 |
| Q8IUN5 | SLC12A1 protein | SLC12A1 | 7.44 | 1 | 46.5 | 5.44 | 0.00 | 0.00 | 0.00 | 0 | 0.00 | 0.00 | 0.00 | 0 | 0.00 | 0.17 | 0.17 | 1 | 0.00 | 0.00 | 0.00 | 0 | 0.00 | 0.04 | 0.04 | 1 |
| Q96EV2 | RNA-binding protein 33 | RBM33 | 2.39 | 1 | 129.9 | 6.93 | 0.00 | 0.17 | 0.17 | 1 | 0.00 | 0.00 | 0.00 | 0 | 0.00 | 0.00 | 0.00 | 0 | 0.00 | 0.00 | 0.00 | 0 | 0.00 | 0.04 | 0.04 | 1 |
| Q5HYM0 | Probable ribonuclease ZC3H12B | ZC3H12B | 1.91 | 1 | 94.1 | 7.69 | 0.00 | 0.00 | 0.00 | 0 | 0.37 | 0.17 | 0.17 | 1 | 0.00 | 0.00 | 0.00 | 0 | 0.00 | 0.00 | 0.00 | 0 | 0.09 | 0.04 | 0.04 | 1 |
| G3V4P8 | Glia maturation factor beta (Fragment) | GMFB | 15.33 | 1 | 17.5 | 5.31 | 0.00 | 0.00 | 0.00 | 0 | 0.00 | 0.00 | 0.00 | 0 | 0.00 | 0.00 | 0.00 | 0 | 0.44 | 0.17 | 0.17 | 1 | 0.11 | 0.04 | 0.04 | 1 |
| A0A0G2JL65 | Advanced glycosylation end product-specific receptor | AGER | 6.90 | 1 | 44.8 | 6.34 | 0.00 | 0.00 | 0.00 | 0 | 0.00 | 0.00 | 0.00 | 0 | 0.00 | 0.17 | 0.17 | 1 | 0.00 | 0.00 | 0.00 | 0 | 0.00 | 0.04 | 0.04 | 1 |
| P61313 | 60S ribosomal protein L15 | RPL15 | 3.43 | 1 | 24.1 | 11.62 | 0.00 | 0.00 | 0.00 | 0 | 0.00 | 0.00 | 0.00 | 0 | 0.00 | 0.17 | 0.17 | 1 | 0.00 | 0.00 | 0.00 | 0 | 0.00 | 0.04 | 0.04 | 1 |
| Q96N46 | Tetratricopeptide repeat protein 14 | TTC14 | 2.34 | 1 | 88.3 | 8.63 | 0.00 | 0.00 | 0.00 | 0 | 0.00 | 0.00 | 0.00 | 0 | 0.00 | 0.00 | 0.00 | 0 | 0.38 | 0.17 | 0.17 | 1 | 0.09 | 0.04 | 0.04 | 1 |
| A0A1W2PRX2 | Uncharacterized protein |  | 18.31 | 1 | 15.9 | 8.41 | 0.00 | 0.00 | 0.00 | 0 | 0.00 | 0.00 | 0.00 | 0 | 0.00 | 0.00 | 0.00 | 0 | 0.00 | 0.17 | 0.17 | 1 | 0.00 | 0.04 | 0.04 | 1 |
| Q8TDN2 | Potassium voltage-gated channel subfamily V member 2 | KCNV2 | 4.40 | 1 | 62.4 | 6.48 | 0.00 | 0.00 | 0.00 | 0 | 0.00 | 0.17 | 0.17 | 1 | 0.00 | 0.00 | 0.00 | 0 | 0.00 | 0.00 | 0.00 | 0 | 0.00 | 0.04 | 0.04 | 1 |
| Q8TDX9 | Polycystic kidney disease protein 1-like 1 | PKD1L1 | 0.91 | 1 | 315.2 | 7.06 | 0.00 | 0.17 | 0.17 | 1 | 0.00 | 0.00 | 0.00 | 0 | 0.00 | 0.00 | 0.00 | 0 | 0.00 | 0.00 | 0.00 | 0 | 0.00 | 0.04 | 0.04 | 1 |
| Q13574 | Diacylglycerol kinase zeta | DGKZ | 2.69 | 1 | 124.1 | 9.04 | 0.00 | 0.17 | 0.17 | 1 | 0.00 | 0.00 | 0.00 | 0 | 0.00 | 0.00 | 0.00 | 0 | 0.00 | 0.00 | 0.00 | 0 | 0.00 | 0.04 | 0.04 | 1 |
| Q14451 | Growth factor receptor-bound protein 7 | GRB7 | 2.82 | 1 | 59.6 | 8.50 | 0.00 | 0.00 | 0.00 | 0 | 0.00 | 0.00 | 0.00 | 0 | 0.00 | 0.00 | 0.00 | 0 | 0.00 | 0.17 | 0.17 | 1 | 0.00 | 0.04 | 0.04 | 1 |
| Q9BT23 | LIM domain-containing protein 2 | LIMD2 | 11.81 | 1 | 14.1 | 9.03 | 0.00 | 0.17 | 0.17 | 1 | 0.00 | 0.00 | 0.00 | 0 | 0.00 | 0.00 | 0.00 | 0 | 0.00 | 0.00 | 0.00 | 0 | 0.00 | 0.04 | 0.04 | 1 |
| Q9H7M9 | V-type immunoglobulin domain-containing suppressor of T-cell activation | VSIR | 6.75 | 1 | 33.9 | 6.95 | 0.00 | 0.17 | 0.17 | 1 | 0.00 | 0.00 | 0.00 | 0 | 0.00 | 0.00 | 0.00 | 0 | 0.00 | 0.00 | 0.00 | 0 | 0.00 | 0.04 | 0.04 | 1 |
| Q9NY15 | Stabilin-1 | STAB1 | 1.09 | 1 | 275.3 | 6.49 | 0.00 | 0.00 | 0.00 | 0 | 0.00 | 0.17 | 0.17 | 1 | 0.00 | 0.00 | 0.00 | 0 | 0.00 | 0.00 | 0.00 | 0 | 0.00 | 0.04 | 0.04 | 1 |
| O94855 | Protein transport protein Sec24D | SEC24D | 2.81 | 1 | 112.9 | 7.25 | 0.00 | 0.17 | 0.17 | 1 | 0.00 | 0.00 | 0.00 | 0 | 0.00 | 0.00 | 0.00 | 0 | 0.00 | 0.00 | 0.00 | 0 | 0.00 | 0.04 | 0.04 | 1 |
| A0A1B0GW15 | Uncharacterized protein |  | 15.58 | 1 | 9.0 | 10.54 | 0.33 | 0.17 | 0.17 | 1 | 0.00 | 0.00 | 0.00 | 0 | 0.00 | 0.00 | 0.00 | 0 | 0.00 | 0.00 | 0.00 | 0 | 0.08 | 0.04 | 0.04 | 1 |
| Q53H12 | Acylglycerol kinase, mitochondrial | AGK | 5.45 | 1 | 47.1 | 8.09 | 0.00 | 0.00 | 0.00 | 0 | 0.34 | 0.17 | 0.17 | 1 | 0.00 | 0.00 | 0.00 | 0 | 0.00 | 0.00 | 0.00 | 0 | 0.08 | 0.04 | 0.04 | 1 |
| P46782 | 40S ribosomal protein S5 | RPS5 | 9.80 | 1 | 22.9 | 9.72 | 0.00 | 0.00 | 0.00 | 0 | 0.00 | 0.00 | 0.00 | 0 | 0.00 | 0.00 | 0.00 | 0 | 0.27 | 0.17 | 0.17 | 1 | 0.07 | 0.04 | 0.04 | 1 |
| Q8TDF5 | Neuropilin and tolloid-like protein 1 | NETO1 | 3.00 | 1 | 60.2 | 7.02 | 0.00 | 0.17 | 0.17 | 1 | 0.00 | 0.00 | 0.00 | 0 | 0.00 | 0.00 | 0.00 | 0 | 0.00 | 0.00 | 0.00 | 0 | 0.00 | 0.04 | 0.04 | 1 |
| P52292 | Importin subunit alpha-1 | KPNA2 | 2.84 | 1 | 57.8 | 5.40 | 0.00 | 0.00 | 0.00 | 0 | 0.00 | 0.00 | 0.00 | 0 | 0.00 | 0.00 | 0.00 | 0 | 0.00 | 0.17 | 0.17 | 1 | 0.00 | 0.04 | 0.04 | 1 |
| E9PR05 | Histone-lysine N-methyltransferase 2A (Fragment) | KMT2A | 1.81 | 1 | 155.4 | 10.36 | 0.00 | 0.00 | 0.00 | 0 | 0.00 | 0.17 | 0.17 | 1 | 0.00 | 0.00 | 0.00 | 0 | 0.00 | 0.00 | 0.00 | 0 | 0.00 | 0.04 | 0.04 | 1 |
| P04626 | Receptor tyrosine-protein kinase erbB-2 | ERBB2 | 1.04 | 1 | 137.8 | 5.91 | 0.00 | 0.00 | 0.00 | 0 | 0.00 | 0.17 | 0.17 | 1 | 0.00 | 0.00 | 0.00 | 0 | 0.00 | 0.00 | 0.00 | 0 | 0.00 | 0.04 | 0.04 | 1 |
| P10523 | S-arrestin | SAG | 6.91 | 1 | 45.1 | 6.57 | 0.00 | 0.00 | 0.00 | 0 | 0.00 | 0.17 | 0.17 | 1 | 0.00 | 0.00 | 0.00 | 0 | 0.00 | 0.00 | 0.00 | 0 | 0.00 | 0.04 | 0.04 | 1 |
| P62277 | 40S ribosomal protein S13 | RPS13 | 9.93 | 1 | 17.2 | 10.54 | 0.00 | 0.00 | 0.00 | 0 | 0.00 | 0.00 | 0.00 | 0 | 0.00 | 0.17 | 0.17 | 1 | 0.00 | 0.00 | 0.00 | 0 | 0.00 | 0.04 | 0.04 | 1 |
| Q9Y2J8 | Protein-arginine deiminase type-2 | PADI2 | 2.56 | 1 | 75.5 | 5.59 | 0.00 | 0.00 | 0.00 | 0 | 0.00 | 0.00 | 0.00 | 0 | 0.00 | 0.17 | 0.17 | 1 | 0.00 | 0.00 | 0.00 | 0 | 0.00 | 0.04 | 0.04 | 1 |
| A0A0C4DG76 | Hephaestin, isoform CRA_c | HEPH | 2.33 | 1 | 130.7 | 5.99 | 0.00 | 0.00 | 0.00 | 0 | 0.00 | 0.00 | 0.00 | 0 | 0.00 | 0.00 | 0.00 | 0 | 0.35 | 0.17 | 0.17 | 1 | 0.09 | 0.04 | 0.04 | 1 |
| Q8NDW8 | Tetratricopeptide repeat protein 21A | TTC21A | 1.67 | 1 | 150.8 | 7.24 | 0.00 | 0.00 | 0.00 | 0 | 0.00 | 0.00 | 0.00 | 0 | 0.00 | 0.00 | 0.00 | 0 | 0.00 | 0.17 | 0.17 | 1 | 0.00 | 0.04 | 0.04 | 1 |
| Q96FL8 | Multidrug and toxin extrusion protein 1 | SLC47A1 | 5.09 | 1 | 61.9 | 7.58 | 0.00 | 0.00 | 0.00 | 0 | 0.00 | 0.17 | 0.17 | 1 | 0.00 | 0.00 | 0.00 | 0 | 0.00 | 0.00 | 0.00 | 0 | 0.00 | 0.04 | 0.04 | 1 |
| P59923 | Zinc finger protein 445 | ZNF445 | 1.26 | 1 | 118.9 | 9.39 | 0.00 | 0.17 | 0.17 | 1 | 0.00 | 0.00 | 0.00 | 0 | 0.00 | 0.00 | 0.00 | 0 | 0.00 | 0.00 | 0.00 | 0 | 0.00 | 0.04 | 0.04 | 1 |
| O75582 | Ribosomal protein S6 kinase alpha-5 | RPS6KA5 | 3.62 | 1 | 89.8 | 7.11 | 0.00 | 0.00 | 0.00 | 0 | 0.00 | 0.17 | 0.17 | 1 | 0.00 | 0.00 | 0.00 | 0 | 0.00 | 0.00 | 0.00 | 0 | 0.00 | 0.04 | 0.04 | 1 |
| Q15121 | Astrocytic phosphoprotein PEA-15 | PEA15 | 13.08 | 1 | 15.0 | 5.02 | 0.00 | 0.00 | 0.00 | 0 | 0.00 | 0.00 | 0.00 | 0 | 0.00 | 0.00 | 0.00 | 0 | 0.42 | 0.17 | 0.17 | 1 | 0.11 | 0.04 | 0.04 | 1 |
| Q9BTV4 | Transmembrane protein 43 | TMEM43 | 6.50 | 1 | 44.8 | 8.13 | 0.00 | 0.17 | 0.17 | 1 | 0.00 | 0.00 | 0.00 | 0 | 0.00 | 0.00 | 0.00 | 0 | 0.00 | 0.00 | 0.00 | 0 | 0.00 | 0.04 | 0.04 | 1 |
| F8VU56 | Receptor-type tyrosine-protein phosphatase beta | PTPRB | 1.18 | 1 | 239.4 | 7.74 | 0.00 | 0.00 | 0.00 | 0 | 0.00 | 0.17 | 0.17 | 1 | 0.00 | 0.00 | 0.00 | 0 | 0.00 | 0.00 | 0.00 | 0 | 0.00 | 0.04 | 0.04 | 1 |
| O60243 | Heparan-sulfate 6-O-sulfotransferase 1 | HS6ST1 | 4.62 | 1 | 48.2 | 8.79 | 0.00 | 0.00 | 0.00 | 0 | 0.29 | 0.17 | 0.17 | 1 | 0.00 | 0.00 | 0.00 | 0 | 0.00 | 0.00 | 0.00 | 0 | 0.07 | 0.04 | 0.04 | 1 |
| Q86SQ6 | Adhesion G protein-coupled receptor A1 | ADGRA1 | 2.86 | 1 | 60.8 | 7.94 | 0.00 | 0.00 | 0.00 | 0 | 0.00 | 0.00 | 0.00 | 0 | 0.00 | 0.17 | 0.17 | 1 | 0.00 | 0.00 | 0.00 | 0 | 0.00 | 0.04 | 0.04 | 1 |
| Q8WZ94 | Olfactory receptor 5P3 | OR5P3 | 8.68 | 1 | 34.3 | 8.31 | 0.00 | 0.00 | 0.00 | 0 | 0.00 | 0.17 | 0.17 | 1 | 0.00 | 0.00 | 0.00 | 0 | 0.00 | 0.00 | 0.00 | 0 | 0.00 | 0.04 | 0.04 | 1 |
| P46934 | E3 ubiquitin-protein ligase NEDD4 | NEDD4 | 1.97 | 1 | 149.0 | 6.58 | 0.00 | 0.00 | 0.00 | 0 | 0.00 | 0.00 | 0.00 | 0 | 0.38 | 0.17 | 0.17 | 1 | 0.00 | 0.00 | 0.00 | 0 | 0.10 | 0.04 | 0.04 | 1 |
| Q8WW24 | Tektin-4 | TEKT4 | 2.99 | 1 | 50.6 | 6.44 | 0.00 | 0.17 | 0.17 | 1 | 0.00 | 0.00 | 0.00 | 0 | 0.00 | 0.00 | 0.00 | 0 | 0.00 | 0.00 | 0.00 | 0 | 0.00 | 0.04 | 0.04 | 1 |
| O75339 | Cartilage intermediate layer protein 1 | CILP | 1.52 | 1 | 132.5 | 8.41 | 0.00 | 0.00 | 0.00 | 0 | 0.29 | 0.17 | 0.17 | 1 | 0.00 | 0.00 | 0.00 | 0 | 0.00 | 0.00 | 0.00 | 0 | 0.07 | 0.04 | 0.04 | 1 |
| Q92878 | DNA repair protein RAD50 | RAD50 | 1.30 | 1 | 153.8 | 6.89 | 0.36 | 0.17 | 0.17 | 1 | 0.00 | 0.00 | 0.00 | 0 | 0.00 | 0.00 | 0.00 | 0 | 0.00 | 0.00 | 0.00 | 0 | 0.09 | 0.04 | 0.04 | 1 |
| Q08257 | Quinone oxidoreductase | CRYZ | 9.42 | 1 | 35.2 | 8.44 | 0.00 | 0.00 | 0.00 | 0 | 0.00 | 0.00 | 0.00 | 0 | 0.00 | 0.00 | 0.00 | 0 | 0.34 | 0.17 | 0.17 | 1 | 0.09 | 0.04 | 0.04 | 1 |
| Q9Y5S9 | RNA-binding protein 8A | RBM8A | 13.79 | 1 | 19.9 | 5.72 | 0.00 | 0.00 | 0.00 | 0 | 0.00 | 0.00 | 0.00 | 0 | 0.00 | 0.00 | 0.00 | 0 | 0.35 | 0.17 | 0.17 | 1 | 0.09 | 0.04 | 0.04 | 1 |
| J3KN16 | Proteasome adapter and scaffold protein ECM29 | ECPAS | 0.74 | 1 | 223.6 | 8.75 | 0.00 | 0.00 | 0.00 | 0 | 0.00 | 0.00 | 0.00 | 0 | 0.00 | 0.00 | 0.00 | 0 | 0.28 | 0.17 | 0.17 | 1 | 0.07 | 0.04 | 0.04 | 1 |
| A0A1W2PRP4 | Protein FAM217A | FAM217A | 4.21 | 1 | 72.2 | 8.92 | 0.34 | 0.17 | 0.17 | 1 | 0.00 | 0.00 | 0.00 | 0 | 0.00 | 0.00 | 0.00 | 0 | 0.00 | 0.00 | 0.00 | 0 | 0.08 | 0.04 | 0.04 | 1 |
| A0A0J9YXC7 | LIM and senescent cell antigen-like-containing domain protein | LIMS4 | 4.77 | 1 | 45.7 | 7.88 | 0.00 | 0.00 | 0.00 | 0 | 0.00 | 0.00 | 0.00 | 0 | 0.00 | 0.17 | 0.17 | 1 | 0.00 | 0.00 | 0.00 | 0 | 0.00 | 0.04 | 0.04 | 1 |
| Q8NEY1 | Neuron navigator 1 | NAV1 | 1.01 | 1 | 202.3 | 8.07 | 0.00 | 0.00 | 0.00 | 0 | 0.00 | 0.17 | 0.17 | 1 | 0.00 | 0.00 | 0.00 | 0 | 0.00 | 0.00 | 0.00 | 0 | 0.00 | 0.04 | 0.04 | 1 |
| Q96R84 | Putative olfactory receptor 1F2 | OR1F2P | 4.17 | 1 | 34.9 | 8.60 | 0.00 | 0.00 | 0.00 | 0 | 0.00 | 0.00 | 0.00 | 0 | 0.00 | 0.00 | 0.00 | 0 | 0.32 | 0.17 | 0.17 | 1 | 0.08 | 0.04 | 0.04 | 1 |
| Q9Y2T3 | Guanine deaminase | GDA | 2.64 | 1 | 51.0 | 5.68 | 0.00 | 0.17 | 0.17 | 1 | 0.00 | 0.00 | 0.00 | 0 | 0.00 | 0.00 | 0.00 | 0 | 0.00 | 0.00 | 0.00 | 0 | 0.00 | 0.04 | 0.04 | 1 |
| O14508 | Suppressor of cytokine sialing 2 | SOCS2 | 9.09 | 1 | 22.2 | 8.69 | 0.00 | 0.00 | 0.00 | 0 | 0.00 | 0.00 | 0.00 | 0 | 0.00 | 0.00 | 0.00 | 0 | 0.00 | 0.17 | 0.17 | 1 | 0.00 | 0.04 | 0.04 | 1 |
| P11233 | Ras-related protein Ral-A | RALA | 9.71 | 1 | 23.6 | 7.11 | 0.00 | 0.00 | 0.00 | 0 | 0.00 | 0.00 | 0.00 | 0 | 0.00 | 0.17 | 0.17 | 1 | 0.00 | 0.00 | 0.00 | 0 | 0.00 | 0.04 | 0.04 | 1 |
| Q8NF91 | Nesprin-1 | SYNE1 | 0.16 | 1 | 1010.5 | 5.53 | 0.00 | 0.00 | 0.00 | 0 | 0.00 | 0.00 | 0.00 | 0 | 0.00 | 0.17 | 0.17 | 1 | 0.00 | 0.00 | 0.00 | 0 | 0.00 | 0.04 | 0.04 | 1 |
| Q8WXI7 | Mucin-16 | MUC16 | 0.19 | 1 | 1518.2 | 5.26 | 0.00 | 0.17 | 0.17 | 1 | 0.00 | 0.00 | 0.00 | 0 | 0.00 | 0.00 | 0.00 | 0 | 0.00 | 0.00 | 0.00 | 0 | 0.00 | 0.04 | 0.04 | 1 |
| Q9UIF8 | Bromodomain adjacent to zinc finger domain protein 2B | BAZ2B | 1.29 | 1 | 240.3 | 6.54 | 0.00 | 0.00 | 0.00 | 0 | 0.00 | 0.00 | 0.00 | 0 | 0.00 | 0.00 | 0.00 | 0 | 0.00 | 0.17 | 0.17 | 1 | 0.00 | 0.04 | 0.04 | 1 |
| A0A0D9SGJ8 | PWWP domain-containing DNA repair factor 3A | PWWP3A | 3.14 | 1 | 80.8 | 8.63 | 0.00 | 0.00 | 0.00 | 0 | 0.00 | 0.17 | 0.17 | 1 | 0.00 | 0.00 | 0.00 | 0 | 0.00 | 0.00 | 0.00 | 0 | 0.00 | 0.04 | 0.04 | 1 |
| Q16270 | Insulin-like growth factor-binding protein 7 | IGFBP7 | 4.96 | 1 | 29.1 | 7.90 | 0.00 | 0.00 | 0.00 | 0 | 0.32 | 0.17 | 0.17 | 1 | 0.00 | 0.00 | 0.00 | 0 | 0.00 | 0.00 | 0.00 | 0 | 0.08 | 0.04 | 0.04 | 1 |
| P49903 | Selenide, water dikinase 1 | SEPHS1 | 5.36 | 1 | 42.9 | 5.97 | 0.00 | 0.17 | 0.17 | 1 | 0.00 | 0.00 | 0.00 | 0 | 0.00 | 0.00 | 0.00 | 0 | 0.00 | 0.00 | 0.00 | 0 | 0.00 | 0.04 | 0.04 | 1 |
| Q8TCP9 | Protein FAM200A | FAM200A | 4.54 | 1 | 66.2 | 6.21 | 0.37 | 0.17 | 0.17 | 1 | 0.00 | 0.00 | 0.00 | 0 | 0.00 | 0.00 | 0.00 | 0 | 0.00 | 0.00 | 0.00 | 0 | 0.09 | 0.04 | 0.04 | 1 |
| Q8N201 | Integrator complex subunit 1 | INTS1 | 0.73 | 1 | 244.1 | 6.13 | 0.00 | 0.00 | 0.00 | 0 | 0.00 | 0.00 | 0.00 | 0 | 0.00 | 0.17 | 0.17 | 1 | 0.00 | 0.00 | 0.00 | 0 | 0.00 | 0.04 | 0.04 | 1 |
| P20336 | Ras-related protein Rab-3A | RAB3A | 8.64 | 1 | 25.0 | 5.03 | 0.00 | 0.00 | 0.00 | 0 | 0.00 | 0.00 | 0.00 | 0 | 0.00 | 0.00 | 0.00 | 0 | 0.00 | 0.17 | 0.17 | 1 | 0.00 | 0.04 | 0.04 | 1 |
| P33681 | T-lymphocyte activation antigen CD80 | CD80 | 10.42 | 1 | 33.0 | 7.65 | 0.44 | 0.17 | 0.17 | 1 | 0.00 | 0.00 | 0.00 | 0 | 0.00 | 0.00 | 0.00 | 0 | 0.00 | 0.00 | 0.00 | 0 | 0.11 | 0.04 | 0.04 | 1 |
| A0A140T930 | HLA class I histocompatibility antigen, Cw-6 alpha chain | HLA-C | 3.53 | 1 | 44.4 | 7.46 | 0.00 | 0.00 | 0.00 | 0 | 0.00 | 0.00 | 0.00 | 0 | 0.29 | 0.17 | 0.17 | 1 | 0.00 | 0.00 | 0.00 | 0 | 0.07 | 0.04 | 0.04 | 1 |
| Q9UJ83 | 2-hydroxyacyl-CoA lyase 1 | HACL1 | 5.19 | 1 | 63.7 | 7.36 | 0.39 | 0.17 | 0.17 | 1 | 0.00 | 0.00 | 0.00 | 0 | 0.00 | 0.00 | 0.00 | 0 | 0.00 | 0.00 | 0.00 | 0 | 0.10 | 0.04 | 0.04 | 1 |
| Q8WXI2 | Connector enhancer of kinase suppressor of ras 2 | CNKSR2 | 2.03 | 1 | 117.5 | 6.79 | 0.00 | 0.00 | 0.00 | 0 | 0.00 | 0.17 | 0.17 | 1 | 0.00 | 0.00 | 0.00 | 0 | 0.00 | 0.00 | 0.00 | 0 | 0.00 | 0.04 | 0.04 | 1 |
| Q9Y286 | Sialic acid-binding Ig-like lectin 7 | SIGLEC7 | 4.93 | 1 | 51.1 | 7.30 | 0.00 | 0.17 | 0.17 | 1 | 0.00 | 0.00 | 0.00 | 0 | 0.00 | 0.00 | 0.00 | 0 | 0.00 | 0.00 | 0.00 | 0 | 0.00 | 0.04 | 0.04 | 1 |
| Q5VT52 | Regulation of nuclear pre-mRNA domain-containing protein 2 | RPRD2 | 2.05 | 1 | 155.9 | 7.42 | 0.00 | 0.00 | 0.00 | 0 | 0.00 | 0.00 | 0.00 | 0 | 0.42 | 0.17 | 0.17 | 1 | 0.00 | 0.00 | 0.00 | 0 | 0.11 | 0.04 | 0.04 | 1 |
| Q9NYQ6 | Cadherin EGF LAG seven-pass G-type receptor 1 | CELSR1 | 0.63 | 1 | 329.3 | 5.92 | 0.00 | 0.17 | 0.17 | 1 | 0.00 | 0.00 | 0.00 | 0 | 0.00 | 0.00 | 0.00 | 0 | 0.00 | 0.00 | 0.00 | 0 | 0.00 | 0.04 | 0.04 | 1 |
| Q0VDF9 | Heat shock 70 kDa protein 14 | HSPA14 | 5.70 | 1 | 54.8 | 5.59 | 0.00 | 0.00 | 0.00 | 0 | 0.00 | 0.00 | 0.00 | 0 | 0.34 | 0.17 | 0.17 | 1 | 0.00 | 0.00 | 0.00 | 0 | 0.09 | 0.04 | 0.04 | 1 |
| O75795 | UDP-glucuronosyltransferase 2B17 | UGT2B17 | 5.28 | 1 | 61.1 | 8.54 | 0.00 | 0.00 | 0.00 | 0 | 0.00 | 0.00 | 0.00 | 0 | 0.00 | 0.17 | 0.17 | 1 | 0.00 | 0.00 | 0.00 | 0 | 0.00 | 0.04 | 0.04 | 1 |
| Q5CZC0 | Fibrous sheath-interacting protein 2 | FSIP2 | 0.28 | 1 | 780.1 | 6.71 | 0.00 | 0.00 | 0.00 | 0 | 0.00 | 0.17 | 0.17 | 1 | 0.00 | 0.00 | 0.00 | 0 | 0.00 | 0.00 | 0.00 | 0 | 0.00 | 0.04 | 0.04 | 1 |
| O94989 | Rho guanine nucleotide exchange factor 15 | ARHGEF15 | 1.90 | 1 | 91.9 | 8.25 | 0.00 | 0.00 | 0.00 | 0 | 0.00 | 0.00 | 0.00 | 0 | 0.00 | 0.00 | 0.00 | 0 | 0.27 | 0.17 | 0.17 | 1 | 0.07 | 0.04 | 0.04 | 1 |
| P06127 | T-cell surface glycoprotein CD5 | CD5 | 6.87 | 1 | 54.5 | 8.21 | 0.00 | 0.00 | 0.00 | 0 | 0.00 | 0.00 | 0.00 | 0 | 0.00 | 0.00 | 0.00 | 0 | 0.34 | 0.17 | 0.17 | 1 | 0.08 | 0.04 | 0.04 | 1 |
| P82932 | 28S ribosomal protein S6, mitochondrial | MRPS6 | 19.20 | 1 | 14.2 | 9.26 | 0.00 | 0.00 | 0.00 | 0 | 0.00 | 0.17 | 0.17 | 1 | 0.00 | 0.00 | 0.00 | 0 | 0.00 | 0.00 | 0.00 | 0 | 0.00 | 0.04 | 0.04 | 1 |
| Q8TCJ0 | F-box only protein 25 | FBXO25 | 2.18 | 1 | 43.3 | 8.09 | 0.00 | 0.17 | 0.17 | 1 | 0.00 | 0.00 | 0.00 | 0 | 0.00 | 0.00 | 0.00 | 0 | 0.00 | 0.00 | 0.00 | 0 | 0.00 | 0.04 | 0.04 | 1 |
| G3V4V5 | E3 ubiquitin-protein ligase HECTD1 (Fragment) | HECTD1 | 2.70 | 1 | 101.9 | 5.34 | 0.00 | 0.00 | 0.00 | 0 | 0.00 | 0.00 | 0.00 | 0 | 0.00 | 0.17 | 0.17 | 1 | 0.00 | 0.00 | 0.00 | 0 | 0.00 | 0.04 | 0.04 | 1 |
| Q96F07 | Cytoplasmic FMR1-interacting protein 2 | CYFIP2 | 1.25 | 1 | 148.3 | 7.31 | 0.00 | 0.00 | 0.00 | 0 | 0.00 | 0.00 | 0.00 | 0 | 0.00 | 0.17 | 0.17 | 1 | 0.00 | 0.00 | 0.00 | 0 | 0.00 | 0.04 | 0.04 | 1 |
| Q8WTS1 | 1-acylglycerol-3-phosphate O-acyltransferase ABHD5 | ABHD5 | 6.30 | 1 | 39.1 | 6.61 | 0.00 | 0.17 | 0.17 | 1 | 0.00 | 0.00 | 0.00 | 0 | 0.00 | 0.00 | 0.00 | 0 | 0.00 | 0.00 | 0.00 | 0 | 0.00 | 0.04 | 0.04 | 1 |
| P02549 | Spectrin alpha chain, erythrocytic 1 | SPTA1 | 0.91 | 1 | 279.8 | 5.05 | 0.00 | 0.17 | 0.17 | 1 | 0.00 | 0.00 | 0.00 | 0 | 0.00 | 0.00 | 0.00 | 0 | 0.00 | 0.00 | 0.00 | 0 | 0.00 | 0.04 | 0.04 | 1 |
| O15305 | Phosphomannomutase 2 | PMM2 | 8.54 | 1 | 28.1 | 6.77 | 0.00 | 0.17 | 0.17 | 1 | 0.00 | 0.00 | 0.00 | 0 | 0.00 | 0.00 | 0.00 | 0 | 0.00 | 0.00 | 0.00 | 0 | 0.00 | 0.04 | 0.04 | 1 |
| Q6ZVF9 | G protein-regulated inducer of neurite outgrowth 3 | GPRIN3 | 3.87 | 1 | 82.4 | 7.56 | 0.00 | 0.17 | 0.17 | 1 | 0.00 | 0.00 | 0.00 | 0 | 0.00 | 0.00 | 0.00 | 0 | 0.00 | 0.00 | 0.00 | 0 | 0.00 | 0.04 | 0.04 | 1 |
| P23141 | Liver carboxylesterase 1 | CES1 | 1.23 | 1 | 62.5 | 6.60 | 0.00 | 0.00 | 0.00 | 0 | 0.00 | 0.00 | 0.00 | 0 | 0.28 | 0.17 | 0.17 | 1 | 0.00 | 0.00 | 0.00 | 0 | 0.07 | 0.04 | 0.04 | 1 |
| P78383 | Solute carrier family 35 member B1 | SLC35B1 | 10.56 | 1 | 35.7 | 9.26 | 0.00 | 0.00 | 0.00 | 0 | 0.00 | 0.00 | 0.00 | 0 | 0.36 | 0.17 | 0.17 | 1 | 0.00 | 0.00 | 0.00 | 0 | 0.09 | 0.04 | 0.04 | 1 |
| E5RII7 | Myozenin-3 | MYOZ3 | 18.24 | 1 | 17.1 | 11.00 | 0.00 | 0.00 | 0.00 | 0 | 0.00 | 0.17 | 0.17 | 1 | 0.00 | 0.00 | 0.00 | 0 | 0.00 | 0.00 | 0.00 | 0 | 0.00 | 0.04 | 0.04 | 1 |
| G5E977 | Nicotinate phosphoribosyltransferase | NAPRT | 4.79 | 1 | 62.1 | 6.73 | 0.00 | 0.00 | 0.00 | 0 | 0.00 | 0.00 | 0.00 | 0 | 0.37 | 0.17 | 0.17 | 1 | 0.00 | 0.00 | 0.00 | 0 | 0.09 | 0.04 | 0.04 | 1 |
| A0A0J9YVW2 | Translin | TSN | 31.52 | 1 | 10.7 | 7.18 | 0.00 | 0.00 | 0.00 | 0 | 0.00 | 0.17 | 0.17 | 1 | 0.00 | 0.00 | 0.00 | 0 | 0.00 | 0.00 | 0.00 | 0 | 0.00 | 0.04 | 0.04 | 1 |
| Q96JB2 | Conserved oligomeric Golgi complex subunit 3 | COG3 | 2.78 | 1 | 94.0 | 5.57 | 0.00 | 0.00 | 0.00 | 0 | 0.00 | 0.00 | 0.00 | 0 | 0.00 | 0.17 | 0.17 | 1 | 0.00 | 0.00 | 0.00 | 0 | 0.00 | 0.04 | 0.04 | 1 |
| Q8N9I0 | Synaptotagmin-2 | SYT2 | 1.67 | 1 | 46.8 | 7.99 | 0.00 | 0.00 | 0.00 | 0 | 0.00 | 0.17 | 0.17 | 1 | 0.00 | 0.00 | 0.00 | 0 | 0.00 | 0.00 | 0.00 | 0 | 0.00 | 0.04 | 0.04 | 1 |
| O43157 | Plexin-B1 | PLXNB1 | 0.98 | 1 | 232.2 | 5.49 | 0.00 | 0.17 | 0.17 | 1 | 0.00 | 0.00 | 0.00 | 0 | 0.00 | 0.00 | 0.00 | 0 | 0.00 | 0.00 | 0.00 | 0 | 0.00 | 0.04 | 0.04 | 1 |
| P0DPD8 | EEF1AKMT4-ECE2 readthrough transcript protein | EEF1AKMT4-ECE2 | 2.60 | 1 | 99.7 | 5.10 | 0.00 | 0.00 | 0.00 | 0 | 0.00 | 0.00 | 0.00 | 0 | 0.38 | 0.17 | 0.17 | 1 | 0.00 | 0.00 | 0.00 | 0 | 0.09 | 0.04 | 0.04 | 1 |
| Q9H7N4 | Splicing factor, arginine/serine-rich 19 | SCAF1 | 1.45 | 1 | 139.2 | 9.25 | 0.00 | 0.00 | 0.00 | 0 | 0.30 | 0.17 | 0.17 | 1 | 0.00 | 0.00 | 0.00 | 0 | 0.00 | 0.00 | 0.00 | 0 | 0.08 | 0.04 | 0.04 | 1 |
| C9JH25 | Proline-rich transmembrane protein 4 | PRRT4 | 2.45 | 1 | 92.7 | 6.67 | 0.00 | 0.00 | 0.00 | 0 | 0.00 | 0.00 | 0.00 | 0 | 0.00 | 0.17 | 0.17 | 1 | 0.00 | 0.00 | 0.00 | 0 | 0.00 | 0.04 | 0.04 | 1 |
| K7EQS9 | CBP80/20-dependent translation initiation factor (Fragment) | CTIF | 18.33 | 1 | 13.0 | 4.22 | 0.00 | 0.00 | 0.00 | 0 | 0.00 | 0.17 | 0.17 | 1 | 0.00 | 0.00 | 0.00 | 0 | 0.00 | 0.00 | 0.00 | 0 | 0.00 | 0.04 | 0.04 | 1 |
| Q66LE6 | Serine/threonine-protein phosphatase 2A 55 kDa regulatory subunit B delta isoform | PPP2R2D | 3.09 | 1 | 52.0 | 6.39 | 0.30 | 0.17 | 0.17 | 1 | 0.00 | 0.00 | 0.00 | 0 | 0.00 | 0.00 | 0.00 | 0 | 0.00 | 0.00 | 0.00 | 0 | 0.08 | 0.04 | 0.04 | 1 |
| Q8N9T8 | Protein KRI1 homolog | KRI1 | 3.98 | 1 | 82.5 | 5.14 | 0.00 | 0.17 | 0.17 | 1 | 0.00 | 0.00 | 0.00 | 0 | 0.00 | 0.00 | 0.00 | 0 | 0.00 | 0.00 | 0.00 | 0 | 0.00 | 0.04 | 0.04 | 1 |
| P61812 | Transforming growth factor beta-2 proprotein | TGFB2 | 3.62 | 1 | 47.7 | 8.53 | 0.00 | 0.00 | 0.00 | 0 | 0.00 | 0.00 | 0.00 | 0 | 0.00 | 0.00 | 0.00 | 0 | 0.00 | 0.17 | 0.17 | 1 | 0.00 | 0.04 | 0.04 | 1 |
| Q14677 | Clathrin interactor 1 | CLINT1 | 2.88 | 1 | 68.2 | 6.42 | 0.00 | 0.00 | 0.00 | 0 | 0.00 | 0.00 | 0.00 | 0 | 0.31 | 0.17 | 0.17 | 1 | 0.00 | 0.00 | 0.00 | 0 | 0.08 | 0.04 | 0.04 | 1 |
| Q6W5P4 | Neuropeptide S receptor | NPSR1 | 6.20 | 1 | 42.7 | 8.34 | 0.00 | 0.00 | 0.00 | 0 | 0.00 | 0.00 | 0.00 | 0 | 0.00 | 0.17 | 0.17 | 1 | 0.00 | 0.00 | 0.00 | 0 | 0.00 | 0.04 | 0.04 | 1 |
| O75608 | Acyl-protein thioesterase 1 | LYPLA1 | 11.30 | 1 | 24.7 | 6.77 | 0.00 | 0.00 | 0.00 | 0 | 0.00 | 0.00 | 0.00 | 0 | 0.00 | 0.00 | 0.00 | 0 | 0.37 | 0.17 | 0.17 | 1 | 0.09 | 0.04 | 0.04 | 1 |
| Q9Y3I0 | tRNA-splicing ligase RtcB homolog | RTCB | 3.17 | 1 | 55.2 | 7.23 | 0.00 | 0.00 | 0.00 | 0 | 0.00 | 0.00 | 0.00 | 0 | 0.00 | 0.17 | 0.17 | 1 | 0.00 | 0.00 | 0.00 | 0 | 0.00 | 0.04 | 0.04 | 1 |
| A0A286YFJ1 | Fer-1-like protein 5 | FER1L5 | 1.00 | 1 | 242.1 | 7.69 | 0.00 | 0.00 | 0.00 | 0 | 0.00 | 0.00 | 0.00 | 0 | 0.00 | 0.17 | 0.17 | 1 | 0.00 | 0.00 | 0.00 | 0 | 0.00 | 0.04 | 0.04 | 1 |
| Q7Z5L7 | Podocan | PODN | 2.94 | 1 | 68.9 | 6.99 | 0.00 | 0.00 | 0.00 | 0 | 0.00 | 0.00 | 0.00 | 0 | 0.33 | 0.17 | 0.17 | 1 | 0.00 | 0.00 | 0.00 | 0 | 0.08 | 0.04 | 0.04 | 1 |
| P35443 | Thrombospondin-4 | THBS4 | 1.35 | 1 | 105.8 | 4.68 | 0.00 | 0.00 | 0.00 | 0 | 0.00 | 0.00 | 0.00 | 0 | 0.00 | 0.17 | 0.17 | 1 | 0.00 | 0.00 | 0.00 | 0 | 0.00 | 0.04 | 0.04 | 1 |
| Q13608 | Peroxisome assembly factor 2 | PEX6 | 2.14 | 1 | 104.0 | 6.34 | 0.00 | 0.00 | 0.00 | 0 | 0.00 | 0.00 | 0.00 | 0 | 0.00 | 0.17 | 0.17 | 1 | 0.00 | 0.00 | 0.00 | 0 | 0.00 | 0.04 | 0.04 | 1 |
| Q8TDN7 | Alkaline ceramidase 1 | ACER1 | 7.95 | 1 | 31.1 | 7.14 | 0.00 | 0.00 | 0.00 | 0 | 0.00 | 0.00 | 0.00 | 0 | 0.00 | 0.17 | 0.17 | 1 | 0.00 | 0.00 | 0.00 | 0 | 0.00 | 0.04 | 0.04 | 1 |
| A0A0U1RQE4 | SH3 domain-containing protein 19 | SH3D19 | 2.67 | 1 | 114.7 | 8.53 | 0.00 | 0.00 | 0.00 | 0 | 0.00 | 0.17 | 0.17 | 1 | 0.00 | 0.00 | 0.00 | 0 | 0.00 | 0.00 | 0.00 | 0 | 0.00 | 0.04 | 0.04 | 1 |
| Q00266 | S-adenosylmethionine synthase isoform type-1 | MAT1A | 5.06 | 1 | 43.6 | 6.29 | 0.00 | 0.00 | 0.00 | 0 | 0.00 | 0.00 | 0.00 | 0 | 0.00 | 0.00 | 0.00 | 0 | 0.00 | 0.17 | 0.17 | 1 | 0.00 | 0.04 | 0.04 | 1 |
| P01024 | Complement C3 | C3 | 0.84 | 1 | 187.0 | 6.40 | 0.00 | 0.00 | 0.00 | 0 | 0.00 | 0.00 | 0.00 | 0 | 0.28 | 0.17 | 0.17 | 1 | 0.00 | 0.00 | 0.00 | 0 | 0.07 | 0.04 | 0.04 | 1 |
| P00367 | Glutamate dehydrogenase 1, mitochondrial | GLUD1 | 5.02 | 1 | 61.4 | 7.80 | 0.00 | 0.00 | 0.00 | 0 | 0.00 | 0.17 | 0.17 | 1 | 0.00 | 0.00 | 0.00 | 0 | 0.00 | 0.00 | 0.00 | 0 | 0.00 | 0.04 | 0.04 | 1 |
| Q5TF39 | Sodium-dependent glucose transporter 1 | MFSD4B | 5.21 | 1 | 56.2 | 5.43 | 0.00 | 0.17 | 0.17 | 1 | 0.00 | 0.00 | 0.00 | 0 | 0.00 | 0.00 | 0.00 | 0 | 0.00 | 0.00 | 0.00 | 0 | 0.00 | 0.04 | 0.04 | 1 |
| Q9UBQ5 | Eukaryotic translation initiation factor 3 subunit K | EIF3K | 7.34 | 1 | 25.0 | 4.93 | 0.00 | 0.00 | 0.00 | 0 | 0.00 | 0.00 | 0.00 | 0 | 0.00 | 0.00 | 0.00 | 0 | 0.33 | 0.17 | 0.17 | 1 | 0.08 | 0.04 | 0.04 | 1 |
| Q9Y6K9 | NF-kappa-B essential modulator | IKBKG | 6.21 | 1 | 48.2 | 5.71 | 0.34 | 0.17 | 0.17 | 1 | 0.00 | 0.00 | 0.00 | 0 | 0.00 | 0.00 | 0.00 | 0 | 0.00 | 0.00 | 0.00 | 0 | 0.08 | 0.04 | 0.04 | 1 |
| Q9HCJ3 | Ribonucleoprotein PTB-binding 2 | RAVER2 | 3.62 | 1 | 74.3 | 7.47 | 0.00 | 0.17 | 0.17 | 1 | 0.00 | 0.00 | 0.00 | 0 | 0.00 | 0.00 | 0.00 | 0 | 0.00 | 0.00 | 0.00 | 0 | 0.00 | 0.04 | 0.04 | 1 |
| Q8N122 | Regulatory-associated protein of mTOR | RPTOR | 2.17 | 1 | 148.9 | 6.89 | 0.00 | 0.17 | 0.17 | 1 | 0.00 | 0.00 | 0.00 | 0 | 0.00 | 0.00 | 0.00 | 0 | 0.00 | 0.00 | 0.00 | 0 | 0.00 | 0.04 | 0.04 | 1 |
| Q5VZ52 | MORN repeat-containing protein 5 | MORN5 | 9.32 | 1 | 18.7 | 5.88 | 0.00 | 0.00 | 0.00 | 0 | 0.00 | 0.00 | 0.00 | 0 | 0.29 | 0.17 | 0.17 | 1 | 0.00 | 0.00 | 0.00 | 0 | 0.07 | 0.04 | 0.04 | 1 |
| O00584 | Ribonuclease T2 | RNASET2 | 6.64 | 1 | 29.5 | 7.08 | 0.00 | 0.00 | 0.00 | 0 | 0.00 | 0.00 | 0.00 | 0 | 0.00 | 0.00 | 0.00 | 0 | 0.30 | 0.17 | 0.17 | 1 | 0.07 | 0.04 | 0.04 | 1 |
| Q8N3E9 | 1-phosphatidylinositol 4,5-bisphosphate phosphodiesterase delta-3 | PLCD3 | 2.15 | 1 | 89.2 | 6.98 | 0.00 | 0.00 | 0.00 | 0 | 0.00 | 0.00 | 0.00 | 0 | 0.00 | 0.17 | 0.17 | 1 | 0.00 | 0.00 | 0.00 | 0 | 0.00 | 0.04 | 0.04 | 1 |
| Q8N5U6 | RING finger protein 10 | RNF10 | 3.33 | 1 | 89.9 | 6.92 | 0.00 | 0.00 | 0.00 | 0 | 0.00 | 0.00 | 0.00 | 0 | 0.00 | 0.00 | 0.00 | 0 | 0.00 | 0.17 | 0.17 | 1 | 0.00 | 0.04 | 0.04 | 1 |
| Q12972 | Nuclear inhibitor of protein phosphatase 1 | PPP1R8 | 7.69 | 1 | 38.5 | 7.37 | 0.00 | 0.00 | 0.00 | 0 | 0.00 | 0.00 | 0.00 | 0 | 0.00 | 0.00 | 0.00 | 0 | 0.00 | 0.17 | 0.17 | 1 | 0.00 | 0.04 | 0.04 | 1 |
| G3V0E4 | Mitochondrial-processing peptidase subunit beta | PMPCB | 5.92 | 1 | 54.2 | 6.83 | 0.00 | 0.00 | 0.00 | 0 | 0.00 | 0.00 | 0.00 | 0 | 0.00 | 0.00 | 0.00 | 0 | 0.40 | 0.17 | 0.17 | 1 | 0.10 | 0.04 | 0.04 | 1 |
| P49286 | Melatonin receptor type 1B | MTNR1B | 8.84 | 1 | 40.2 | 8.82 | 0.00 | 0.00 | 0.00 | 0 | 0.00 | 0.00 | 0.00 | 0 | 0.00 | 0.00 | 0.00 | 0 | 0.00 | 0.17 | 0.17 | 1 | 0.00 | 0.04 | 0.04 | 1 |
| Q6QEF8 | Coronin-6 | CORO6 | 4.45 | 1 | 52.7 | 5.96 | 0.00 | 0.00 | 0.00 | 0 | 0.00 | 0.17 | 0.17 | 1 | 0.00 | 0.00 | 0.00 | 0 | 0.00 | 0.00 | 0.00 | 0 | 0.00 | 0.04 | 0.04 | 1 |
| Q15369 | Elongin-C | ELOC | 17.86 | 1 | 12.5 | 4.78 | 0.00 | 0.00 | 0.00 | 0 | 0.00 | 0.00 | 0.00 | 0 | 0.00 | 0.00 | 0.00 | 0 | 0.27 | 0.17 | 0.17 | 1 | 0.07 | 0.04 | 0.04 | 1 |
| Q96M27 | Protein PRRC1 | PRRC1 | 3.82 | 1 | 46.7 | 5.83 | 0.00 | 0.00 | 0.00 | 0 | 0.00 | 0.00 | 0.00 | 0 | 0.00 | 0.17 | 0.17 | 1 | 0.00 | 0.00 | 0.00 | 0 | 0.00 | 0.04 | 0.04 | 1 |
| P30989 | Neurotensin receptor type 1 | NTSR1 | 6.70 | 1 | 46.2 | 9.35 | 0.00 | 0.17 | 0.17 | 1 | 0.00 | 0.00 | 0.00 | 0 | 0.00 | 0.00 | 0.00 | 0 | 0.00 | 0.00 | 0.00 | 0 | 0.00 | 0.04 | 0.04 | 1 |
| H0Y8X4 | 2'-deoxynucleoside 5'-phosphate N-hydrolase 1 (Fragment) | DNPH1 | 7.00 | 1 | 25.9 | 5.50 | 0.00 | 0.00 | 0.00 | 0 | 0.00 | 0.00 | 0.00 | 0 | 0.00 | 0.00 | 0.00 | 0 | 0.00 | 0.17 | 0.17 | 1 | 0.00 | 0.04 | 0.04 | 1 |
| P42285 | Exosome RNA helicase MTR4 | MTREX | 2.11 | 1 | 117.7 | 6.52 | 0.38 | 0.17 | 0.17 | 1 | 0.00 | 0.00 | 0.00 | 0 | 0.00 | 0.00 | 0.00 | 0 | 0.00 | 0.00 | 0.00 | 0 | 0.10 | 0.04 | 0.04 | 1 |
| K7EKD8 | Calpain small subunit 1 | CAPNS1 | 15.13 | 1 | 24.8 | 5.11 | 0.00 | 0.00 | 0.00 | 0 | 0.00 | 0.00 | 0.00 | 0 | 0.00 | 0.00 | 0.00 | 0 | 0.00 | 0.17 | 0.17 | 1 | 0.00 | 0.04 | 0.04 | 1 |
| F5H4N6 | Glutamate receptor-interacting protein 1 (Fragment) | GRIP1 | 3.03 | 1 | 114.0 | 6.01 | 0.00 | 0.17 | 0.17 | 1 | 0.00 | 0.00 | 0.00 | 0 | 0.00 | 0.00 | 0.00 | 0 | 0.00 | 0.00 | 0.00 | 0 | 0.00 | 0.04 | 0.04 | 1 |
| Q9ULJ7 | Ankyrin repeat domain-containing protein 50 | ANKRD50 | 1.40 | 1 | 155.8 | 6.60 | 0.00 | 0.00 | 0.00 | 0 | 0.00 | 0.17 | 0.17 | 1 | 0.00 | 0.00 | 0.00 | 0 | 0.00 | 0.00 | 0.00 | 0 | 0.00 | 0.04 | 0.04 | 1 |
| Q92954 | Proteoglycan 4 | PRG4 | 1.21 | 1 | 151.0 | 9.51 | 0.00 | 0.00 | 0.00 | 0 | 0.00 | 0.00 | 0.00 | 0 | 0.00 | 0.00 | 0.00 | 0 | 0.31 | 0.17 | 0.17 | 1 | 0.08 | 0.04 | 0.04 | 1 |
| A0A1B0GW23 | ABHD14A-ACY1 readthrough (Fragment) | ABHD14A-ACY1 | 3.58 | 1 | 65.4 | 6.67 | 0.38 | 0.17 | 0.17 | 1 | 0.00 | 0.00 | 0.00 | 0 | 0.00 | 0.00 | 0.00 | 0 | 0.00 | 0.00 | 0.00 | 0 | 0.10 | 0.04 | 0.04 | 1 |
| Q9C0A1 | Zinc finger homeobox protein 2 | ZFHX2 | 1.13 | 1 | 274.0 | 5.88 | 0.00 | 0.17 | 0.17 | 1 | 0.00 | 0.00 | 0.00 | 0 | 0.00 | 0.00 | 0.00 | 0 | 0.00 | 0.00 | 0.00 | 0 | 0.00 | 0.04 | 0.04 | 1 |
| Q9H223 | EH domain-containing protein 4 | EHD4 | 2.03 | 1 | 61.1 | 6.76 | 0.00 | 0.00 | 0.00 | 0 | 0.00 | 0.00 | 0.00 | 0 | 0.00 | 0.17 | 0.17 | 1 | 0.00 | 0.00 | 0.00 | 0 | 0.00 | 0.04 | 0.04 | 1 |
| Q9HCF6 | Transient receptor potential cation channel subfamily M member 3 | TRPM3 | 0.92 | 1 | 197.4 | 7.15 | 0.00 | 0.00 | 0.00 | 0 | 0.00 | 0.00 | 0.00 | 0 | 0.31 | 0.17 | 0.17 | 1 | 0.00 | 0.00 | 0.00 | 0 | 0.08 | 0.04 | 0.04 | 1 |
| Q6SZW1 | Sterile alpha and TIR motif-containing protein 1 | SARM1 | 3.59 | 1 | 79.3 | 6.55 | 0.00 | 0.00 | 0.00 | 0 | 0.00 | 0.00 | 0.00 | 0 | 0.00 | 0.00 | 0.00 | 0 | 0.00 | 0.17 | 0.17 | 1 | 0.00 | 0.04 | 0.04 | 1 |
| Q86XS5 | Angiopoietin-related protein 5 | ANGPTL5 | 5.93 | 1 | 44.1 | 6.60 | 0.00 | 0.00 | 0.00 | 0 | 0.00 | 0.00 | 0.00 | 0 | 0.00 | 0.00 | 0.00 | 0 | 0.00 | 0.17 | 0.17 | 1 | 0.00 | 0.04 | 0.04 | 1 |
| Q9H3T2 | Semaphorin-6C | SEMA6C | 2.47 | 1 | 99.6 | 8.03 | 0.00 | 0.00 | 0.00 | 0 | 0.00 | 0.17 | 0.17 | 1 | 0.00 | 0.00 | 0.00 | 0 | 0.00 | 0.00 | 0.00 | 0 | 0.00 | 0.04 | 0.04 | 1 |
| Q6UXC1 | Apical endosomal glycoprotein | MAMDC4 | 1.15 | 1 | 131.4 | 6.07 | 0.00 | 0.00 | 0.00 | 0 | 0.00 | 0.00 | 0.00 | 0 | 0.00 | 0.00 | 0.00 | 0 | 0.00 | 0.17 | 0.17 | 1 | 0.00 | 0.04 | 0.04 | 1 |
| O75964 | ATP synthase subunit g, mitochondrial | ATP5MG | 23.30 | 1 | 11.4 | 9.64 | 0.00 | 0.17 | 0.17 | 1 | 0.00 | 0.00 | 0.00 | 0 | 0.00 | 0.00 | 0.00 | 0 | 0.00 | 0.00 | 0.00 | 0 | 0.00 | 0.04 | 0.04 | 1 |
| P14415 | Sodium/potassium-transporting ATPase subunit beta-2 | ATP1B2 | 10.00 | 1 | 33.3 | 8.31 | 0.00 | 0.00 | 0.00 | 0 | 0.00 | 0.00 | 0.00 | 0 | 0.00 | 0.17 | 0.17 | 1 | 0.00 | 0.00 | 0.00 | 0 | 0.00 | 0.04 | 0.04 | 1 |
| Q92845 | Kinesin-associated protein 3 | KIFAP3 | 2.02 | 1 | 91.1 | 5.08 | 0.00 | 0.00 | 0.00 | 0 | 0.00 | 0.00 | 0.00 | 0 | 0.00 | 0.00 | 0.00 | 0 | 0.29 | 0.17 | 0.17 | 1 | 0.07 | 0.04 | 0.04 | 1 |
| Q9NSK0 | Kinesin light chain 4 | KLC4 | 4.68 | 1 | 68.6 | 6.18 | 0.00 | 0.00 | 0.00 | 0 | 0.00 | 0.00 | 0.00 | 0 | 0.00 | 0.17 | 0.17 | 1 | 0.00 | 0.00 | 0.00 | 0 | 0.00 | 0.04 | 0.04 | 1 |
| O14727 | Apoptotic protease-activating factor 1 | APAF1 | 1.44 | 1 | 141.7 | 6.40 | 0.00 | 0.00 | 0.00 | 0 | 0.00 | 0.17 | 0.17 | 1 | 0.00 | 0.00 | 0.00 | 0 | 0.00 | 0.00 | 0.00 | 0 | 0.00 | 0.04 | 0.04 | 1 |
| Q8TED9 | Actin filament-associated protein 1-like 1 | AFAP1L1 | 3.13 | 1 | 86.4 | 6.80 | 0.00 | 0.00 | 0.00 | 0 | 0.00 | 0.00 | 0.00 | 0 | 0.00 | 0.17 | 0.17 | 1 | 0.00 | 0.00 | 0.00 | 0 | 0.00 | 0.04 | 0.04 | 1 |
| Q8NGT2 | Olfactory receptor 13J1 | OR13J1 | 10.26 | 1 | 34.7 | 8.51 | 0.00 | 0.00 | 0.00 | 0 | 0.00 | 0.00 | 0.00 | 0 | 0.00 | 0.00 | 0.00 | 0 | 0.00 | 0.17 | 0.17 | 1 | 0.00 | 0.04 | 0.04 | 1 |
| Q96BD5 | PHD finger protein 21A | PHF21A | 1.76 | 1 | 74.8 | 9.45 | 0.00 | 0.00 | 0.00 | 0 | 0.00 | 0.00 | 0.00 | 0 | 0.00 | 0.00 | 0.00 | 0 | 0.30 | 0.17 | 0.17 | 1 | 0.08 | 0.04 | 0.04 | 1 |
| H3BTH8 | Hyaluronan and proteoglycan link protein 3 | HAPLN3 | 4.27 | 1 | 47.7 | 6.68 | 0.00 | 0.00 | 0.00 | 0 | 0.00 | 0.00 | 0.00 | 0 | 0.38 | 0.17 | 0.17 | 1 | 0.00 | 0.00 | 0.00 | 0 | 0.10 | 0.04 | 0.04 | 1 |
| Q2KHR2 | DNA-binding protein RFX7 | RFX7 | 1.54 | 1 | 146.8 | 6.76 | 0.00 | 0.00 | 0.00 | 0 | 0.00 | 0.17 | 0.17 | 1 | 0.00 | 0.00 | 0.00 | 0 | 0.00 | 0.00 | 0.00 | 0 | 0.00 | 0.04 | 0.04 | 1 |
| Q9P266 | Junctional protein associated with coronary artery disease | JCAD | 1.55 | 1 | 148.3 | 7.09 | 0.28 | 0.17 | 0.17 | 1 | 0.00 | 0.00 | 0.00 | 0 | 0.00 | 0.00 | 0.00 | 0 | 0.00 | 0.00 | 0.00 | 0 | 0.07 | 0.04 | 0.04 | 1 |
| Q9BZ72 | Membrane-associated phosphatidylinositol transfer protein 2 | PITPNM2 | 1.11 | 1 | 148.8 | 7.17 | 0.27 | 0.17 | 0.17 | 1 | 0.00 | 0.00 | 0.00 | 0 | 0.00 | 0.00 | 0.00 | 0 | 0.00 | 0.00 | 0.00 | 0 | 0.07 | 0.04 | 0.04 | 1 |
| Q9NR30 | Nucleolar RNA helicase 2 | DDX21 | 2.81 | 1 | 87.3 | 9.28 | 0.00 | 0.00 | 0.00 | 0 | 0.00 | 0.00 | 0.00 | 0 | 0.00 | 0.17 | 0.17 | 1 | 0.00 | 0.00 | 0.00 | 0 | 0.00 | 0.04 | 0.04 | 1 |
| A0A0U1RRH6 | PHD finger protein 14 | PHF14 | 1.90 | 1 | 106.9 | 5.34 | 0.00 | 0.00 | 0.00 | 0 | 0.00 | 0.00 | 0.00 | 0 | 0.00 | 0.00 | 0.00 | 0 | 0.00 | 0.17 | 0.17 | 1 | 0.00 | 0.04 | 0.04 | 1 |
| P17980 | 26S proteasome regulatory subunit 6A | PSMC3 | 3.64 | 1 | 49.2 | 5.24 | 0.00 | 0.00 | 0.00 | 0 | 0.00 | 0.00 | 0.00 | 0 | 0.29 | 0.17 | 0.17 | 1 | 0.00 | 0.00 | 0.00 | 0 | 0.07 | 0.04 | 0.04 | 1 |
| O15260 | Surfeit locus protein 4 | SURF4 | 5.95 | 1 | 30.4 | 7.78 | 0.00 | 0.00 | 0.00 | 0 | 0.00 | 0.00 | 0.00 | 0 | 0.28 | 0.17 | 0.17 | 1 | 0.00 | 0.00 | 0.00 | 0 | 0.07 | 0.04 | 0.04 | 1 |
| Q86UP9 | LHFPL tetraspan subfamily member 3 protein | LHFPL3 | 12.71 | 1 | 25.8 | 5.95 | 0.00 | 0.00 | 0.00 | 0 | 0.00 | 0.00 | 0.00 | 0 | 0.00 | 0.00 | 0.00 | 0 | 0.38 | 0.17 | 0.17 | 1 | 0.09 | 0.04 | 0.04 | 1 |
| Q9H0E9 | Bromodomain-containing protein 8 | BRD8 | 2.02 | 1 | 135.3 | 4.60 | 0.00 | 0.00 | 0.00 | 0 | 0.00 | 0.00 | 0.00 | 0 | 0.00 | 0.17 | 0.17 | 1 | 0.00 | 0.00 | 0.00 | 0 | 0.00 | 0.04 | 0.04 | 1 |
| Q8IWN7 | Retinitis pigmentosa 1-like 1 protein | RP1L1 | 1.04 | 1 | 252.1 | 4.45 | 0.00 | 0.00 | 0.00 | 0 | 0.00 | 0.00 | 0.00 | 0 | 0.00 | 0.17 | 0.17 | 1 | 0.00 | 0.00 | 0.00 | 0 | 0.00 | 0.04 | 0.04 | 1 |
| Q96B21 | Transmembrane protein 45B | TMEM45B | 10.91 | 1 | 31.8 | 6.95 | 0.00 | 0.00 | 0.00 | 0 | 0.00 | 0.00 | 0.00 | 0 | 0.00 | 0.17 | 0.17 | 1 | 0.00 | 0.00 | 0.00 | 0 | 0.00 | 0.04 | 0.04 | 1 |
| Q9NYZ3 | G2 and S phase-expressed protein 1 | GTSE1 | 2.78 | 1 | 76.6 | 9.39 | 0.00 | 0.00 | 0.00 | 0 | 0.00 | 0.17 | 0.17 | 1 | 0.00 | 0.00 | 0.00 | 0 | 0.00 | 0.00 | 0.00 | 0 | 0.00 | 0.04 | 0.04 | 1 |
| A0A140T8Y2 | Guanine nucleotide-binding protein-like 1 (Fragment) | GNL1 | 6.39 | 1 | 44.8 | 4.93 | 0.00 | 0.00 | 0.00 | 0 | 0.00 | 0.00 | 0.00 | 0 | 0.00 | 0.00 | 0.00 | 0 | 0.38 | 0.17 | 0.17 | 1 | 0.10 | 0.04 | 0.04 | 1 |
| A0A0G2JJ84 | Butyrophilin-like protein 2 | BTNL2 | 5.19 | 1 | 53.5 | 5.19 | 0.00 | 0.17 | 0.17 | 1 | 0.00 | 0.00 | 0.00 | 0 | 0.00 | 0.00 | 0.00 | 0 | 0.00 | 0.00 | 0.00 | 0 | 0.00 | 0.04 | 0.04 | 1 |
| Q5H913 | ADP-ribosylation factor-like protein 13A | ARL13A | 5.17 | 1 | 33.0 | 9.03 | 0.00 | 0.00 | 0.00 | 0 | 0.00 | 0.00 | 0.00 | 0 | 0.00 | 0.00 | 0.00 | 0 | 0.00 | 0.17 | 0.17 | 1 | 0.00 | 0.04 | 0.04 | 1 |
| A0A286YEY4 | Immunoglobulin heavy constant gamma 2 (Fragment) | IGHG2 | 6.58 | 1 | 43.8 | 6.52 | 0.00 | 0.00 | 0.00 | 0 | 0.00 | 0.17 | 0.17 | 1 | 0.00 | 0.00 | 0.00 | 0 | 0.00 | 0.00 | 0.00 | 0 | 0.00 | 0.04 | 0.04 | 1 |
| H0YCW4 | Teneurin-4 (Fragment) | TENM4 | 17.22 | 1 | 15.7 | 4.89 | 0.00 | 0.00 | 0.00 | 0 | 0.00 | 0.00 | 0.00 | 0 | 0.37 | 0.17 | 0.17 | 1 | 0.00 | 0.00 | 0.00 | 0 | 0.09 | 0.04 | 0.04 | 1 |
| Q8WZ19 | BTB/POZ domain-containing adapter for CUL3-mediated RhoA degradation protein 1 | KCTD13 | 4.86 | 1 | 36.3 | 7.23 | 0.00 | 0.00 | 0.00 | 0 | 0.00 | 0.00 | 0.00 | 0 | 0.00 | 0.17 | 0.17 | 1 | 0.00 | 0.00 | 0.00 | 0 | 0.00 | 0.04 | 0.04 | 1 |
| Q9ULM3 | YEATS domain-containing protein 2 | YEATS2 | 2.04 | 1 | 150.7 | 8.98 | 0.00 | 0.00 | 0.00 | 0 | 0.00 | 0.00 | 0.00 | 0 | 0.00 | 0.00 | 0.00 | 0 | 0.39 | 0.17 | 0.17 | 1 | 0.10 | 0.04 | 0.04 | 1 |
| Q86SQ7 | Serologically defined colon cancer antigen 8 | SDCCAG8 | 3.51 | 1 | 82.6 | 5.81 | 0.00 | 0.17 | 0.17 | 1 | 0.00 | 0.00 | 0.00 | 0 | 0.00 | 0.00 | 0.00 | 0 | 0.00 | 0.00 | 0.00 | 0 | 0.00 | 0.04 | 0.04 | 1 |
| Q9NZQ9 | Tropomodulin-4 | TMOD4 | 8.41 | 1 | 39.3 | 4.75 | 0.00 | 0.17 | 0.17 | 1 | 0.00 | 0.00 | 0.00 | 0 | 0.00 | 0.00 | 0.00 | 0 | 0.00 | 0.00 | 0.00 | 0 | 0.00 | 0.04 | 0.04 | 1 |
| P55103 | Inhibin beta C chain | INHBC | 5.97 | 1 | 38.2 | 7.11 | 0.00 | 0.00 | 0.00 | 0 | 0.00 | 0.00 | 0.00 | 0 | 0.00 | 0.17 | 0.17 | 1 | 0.00 | 0.00 | 0.00 | 0 | 0.00 | 0.04 | 0.04 | 1 |
| Q5VTR2 | E3 ubiquitin-protein ligase BRE1A | RNF20 | 0.72 | 1 | 113.6 | 5.94 | 0.00 | 0.00 | 0.00 | 0 | 0.00 | 0.00 | 0.00 | 0 | 0.00 | 0.17 | 0.17 | 1 | 0.00 | 0.00 | 0.00 | 0 | 0.00 | 0.04 | 0.04 | 1 |
| P55089 | Urocortin | UCN | 17.74 | 1 | 13.5 | 11.71 | 0.00 | 0.00 | 0.00 | 0 | 0.00 | 0.00 | 0.00 | 0 | 0.00 | 0.00 | 0.00 | 0 | 0.00 | 0.17 | 0.17 | 1 | 0.00 | 0.04 | 0.04 | 1 |
| A0A0J9YWL0 | Beta/gamma crystallin domain-containing protein 1 | CRYBG1 | 0.75 | 1 | 231.6 | 5.81 | 0.00 | 0.00 | 0.00 | 0 | 0.00 | 0.00 | 0.00 | 0 | 0.00 | 0.00 | 0.00 | 0 | 0.00 | 0.17 | 0.17 | 1 | 0.00 | 0.04 | 0.04 | 1 |
| K7ESF1 | Long-chain-fatty-acid--CoA ligase ACSBG2 | ACSBG2 | 20.90 | 1 | 15.0 | 9.10 | 0.00 | 0.00 | 0.00 | 0 | 0.00 | 0.17 | 0.17 | 1 | 0.00 | 0.00 | 0.00 | 0 | 0.00 | 0.00 | 0.00 | 0 | 0.00 | 0.04 | 0.04 | 1 |
| Q96KN7 | X-linked retinitis pigmentosa GTPase regulator-interacting protein 1 | RPGRIP1 | 1.32 | 1 | 146.6 | 5.68 | 0.00 | 0.17 | 0.17 | 1 | 0.00 | 0.00 | 0.00 | 0 | 0.00 | 0.00 | 0.00 | 0 | 0.00 | 0.00 | 0.00 | 0 | 0.00 | 0.04 | 0.04 | 1 |
| Q96PD7 | Diacylglycerol O-acyltransferase 2 | DGAT2 | 5.67 | 1 | 43.8 | 9.41 | 0.00 | 0.17 | 0.17 | 1 | 0.00 | 0.00 | 0.00 | 0 | 0.00 | 0.00 | 0.00 | 0 | 0.00 | 0.00 | 0.00 | 0 | 0.00 | 0.04 | 0.04 | 1 |
| Q9BY71 | Leucine-rich repeat-containing protein 3 | LRRC3 | 10.51 | 1 | 28.1 | 6.93 | 0.00 | 0.17 | 0.17 | 1 | 0.00 | 0.00 | 0.00 | 0 | 0.00 | 0.00 | 0.00 | 0 | 0.00 | 0.00 | 0.00 | 0 | 0.00 | 0.04 | 0.04 | 1 |
| Q9Y6M7 | Sodium bicarbonate cotransporter 3 | SLC4A7 | 2.39 | 1 | 136.0 | 6.71 | 0.00 | 0.00 | 0.00 | 0 | 0.00 | 0.00 | 0.00 | 0 | 0.00 | 0.00 | 0.00 | 0 | 0.00 | 0.17 | 0.17 | 1 | 0.00 | 0.04 | 0.04 | 1 |
| P53701 | Cytochrome c-type heme lyase | HCCS | 4.85 | 1 | 30.6 | 6.68 | 0.00 | 0.00 | 0.00 | 0 | 0.00 | 0.00 | 0.00 | 0 | 0.00 | 0.17 | 0.17 | 1 | 0.00 | 0.00 | 0.00 | 0 | 0.00 | 0.04 | 0.04 | 1 |
| Q6PGP7 | Tetratricopeptide repeat protein 37 | TTC37 | 1.66 | 1 | 175.4 | 7.53 | 0.00 | 0.00 | 0.00 | 0 | 0.00 | 0.00 | 0.00 | 0 | 0.35 | 0.17 | 0.17 | 1 | 0.00 | 0.00 | 0.00 | 0 | 0.09 | 0.04 | 0.04 | 1 |
| P26373 | 60S ribosomal protein L13 | RPL13 | 3.79 | 1 | 24.2 | 11.65 | 0.00 | 0.00 | 0.00 | 0 | 0.00 | 0.00 | 0.00 | 0 | 0.29 | 0.17 | 0.17 | 1 | 0.00 | 0.00 | 0.00 | 0 | 0.07 | 0.04 | 0.04 | 1 |
| J3KR97 | Tubulin-specific chaperone D | TBCD | 2.36 | 1 | 136.5 | 6.34 | 0.00 | 0.00 | 0.00 | 0 | 0.00 | 0.00 | 0.00 | 0 | 0.00 | 0.00 | 0.00 | 0 | 0.00 | 0.17 | 0.17 | 1 | 0.00 | 0.04 | 0.04 | 1 |
| Q96RI1 | Bile acid receptor | NR1H4 | 4.12 | 1 | 55.9 | 6.81 | 0.00 | 0.00 | 0.00 | 0 | 0.00 | 0.00 | 0.00 | 0 | 0.00 | 0.17 | 0.17 | 1 | 0.00 | 0.00 | 0.00 | 0 | 0.00 | 0.04 | 0.04 | 1 |
| O15482 | Testis-specific protein TEX28 | TEX28 | 7.07 | 1 | 46.1 | 6.24 | 0.00 | 0.00 | 0.00 | 0 | 0.00 | 0.17 | 0.17 | 1 | 0.00 | 0.00 | 0.00 | 0 | 0.00 | 0.00 | 0.00 | 0 | 0.00 | 0.04 | 0.04 | 1 |
| Q9BZD2 | Equilibrative nucleoside transporter 3 | SLC29A3 | 6.53 | 1 | 51.8 | 7.78 | 0.00 | 0.00 | 0.00 | 0 | 0.00 | 0.00 | 0.00 | 0 | 0.00 | 0.00 | 0.00 | 0 | 0.00 | 0.17 | 0.17 | 1 | 0.00 | 0.04 | 0.04 | 1 |
| Q75VX8 | GRB2-associated and regulator of MAPK protein 2 | GAREM2 | 2.52 | 1 | 92.8 | 6.90 | 0.00 | 0.17 | 0.17 | 1 | 0.00 | 0.00 | 0.00 | 0 | 0.00 | 0.00 | 0.00 | 0 | 0.00 | 0.00 | 0.00 | 0 | 0.00 | 0.04 | 0.04 | 1 |
| Q5T011 | KICSTOR complex protein SZT2 | SZT2 | 0.64 | 1 | 377.8 | 6.27 | 0.00 | 0.00 | 0.00 | 0 | 0.00 | 0.00 | 0.00 | 0 | 0.00 | 0.00 | 0.00 | 0 | 0.00 | 0.17 | 0.17 | 1 | 0.00 | 0.04 | 0.04 | 1 |
| P51648 | Fatty aldehyde dehydrogenase | ALDH3A2 | 7.01 | 1 | 54.8 | 7.88 | 0.00 | 0.17 | 0.17 | 1 | 0.00 | 0.00 | 0.00 | 0 | 0.00 | 0.00 | 0.00 | 0 | 0.00 | 0.00 | 0.00 | 0 | 0.00 | 0.04 | 0.04 | 1 |
| Q99615 | DnaJ homolog subfamily C member 7 | DNAJC7 | 4.45 | 1 | 56.4 | 6.96 | 0.00 | 0.17 | 0.17 | 1 | 0.00 | 0.00 | 0.00 | 0 | 0.00 | 0.00 | 0.00 | 0 | 0.00 | 0.00 | 0.00 | 0 | 0.00 | 0.04 | 0.04 | 1 |
| G3V325 | ATP5MF-PTCD1 readthrough | ATP5MF-PTCD1 | 1.74 | 1 | 84.1 | 8.72 | 0.00 | 0.00 | 0.00 | 0 | 0.00 | 0.17 | 0.17 | 1 | 0.00 | 0.00 | 0.00 | 0 | 0.00 | 0.00 | 0.00 | 0 | 0.00 | 0.04 | 0.04 | 1 |
| A0A0A0MTC1 | E3 ubiquitin-protein ligase RNF213 | RNF213 | 0.46 | 1 | 596.1 | 6.42 | 0.00 | 0.00 | 0.00 | 0 | 0.00 | 0.00 | 0.00 | 0 | 0.00 | 0.00 | 0.00 | 0 | 0.34 | 0.17 | 0.17 | 1 | 0.09 | 0.04 | 0.04 | 1 |
| O94874 | E3 UFM1-protein ligase 1 | UFL1 | 2.90 | 1 | 89.5 | 6.79 | 0.00 | 0.17 | 0.17 | 1 | 0.00 | 0.00 | 0.00 | 0 | 0.00 | 0.00 | 0.00 | 0 | 0.00 | 0.00 | 0.00 | 0 | 0.00 | 0.04 | 0.04 | 1 |
| Q8TD57 | Dynein heavy chain 3, axonemal | DNAH3 | 0.24 | 1 | 470.5 | 6.43 | 0.00 | 0.00 | 0.00 | 0 | 0.00 | 0.00 | 0.00 | 0 | 0.00 | 0.00 | 0.00 | 0 | 0.30 | 0.17 | 0.17 | 1 | 0.08 | 0.04 | 0.04 | 1 |
| Q9NYX4 | Neuron-specific vesicular protein calcyon | CALY | 7.83 | 1 | 23.4 | 6.90 | 0.00 | 0.00 | 0.00 | 0 | 0.00 | 0.17 | 0.17 | 1 | 0.00 | 0.00 | 0.00 | 0 | 0.00 | 0.00 | 0.00 | 0 | 0.00 | 0.04 | 0.04 | 1 |
| O75694 | Nuclear pore complex protein Nup155 | NUP155 | 2.01 | 1 | 155.1 | 6.16 | 0.00 | 0.00 | 0.00 | 0 | 0.35 | 0.17 | 0.17 | 1 | 0.00 | 0.00 | 0.00 | 0 | 0.00 | 0.00 | 0.00 | 0 | 0.09 | 0.04 | 0.04 | 1 |
| P53355 | Death-associated protein kinase 1 | DAPK1 | 1.54 | 1 | 159.9 | 6.83 | 0.00 | 0.00 | 0.00 | 0 | 0.00 | 0.00 | 0.00 | 0 | 0.00 | 0.00 | 0.00 | 0 | 0.27 | 0.17 | 0.17 | 1 | 0.07 | 0.04 | 0.04 | 1 |
| Q02985 | Complement factor H-related protein 3 | CFHR3 | 5.76 | 1 | 37.3 | 7.55 | 0.00 | 0.00 | 0.00 | 0 | 0.00 | 0.17 | 0.17 | 1 | 0.00 | 0.00 | 0.00 | 0 | 0.00 | 0.00 | 0.00 | 0 | 0.00 | 0.04 | 0.04 | 1 |
| Q92870 | Amyloid-beta A4 precursor protein-binding family B member 2 | APBB2 | 1.85 | 1 | 83.3 | 6.10 | 0.00 | 0.00 | 0.00 | 0 | 0.00 | 0.00 | 0.00 | 0 | 0.00 | 0.00 | 0.00 | 0 | 0.28 | 0.17 | 0.17 | 1 | 0.07 | 0.04 | 0.04 | 1 |
| Q9P296 | C5a anaphylatoxin chemotactic receptor 2 | C5AR2 | 8.01 | 1 | 36.1 | 7.87 | 0.00 | 0.00 | 0.00 | 0 | 0.00 | 0.00 | 0.00 | 0 | 0.00 | 0.00 | 0.00 | 0 | 0.41 | 0.17 | 0.17 | 1 | 0.10 | 0.04 | 0.04 | 1 |
| Q6VVX0 | Vitamin D 25-hydroxylase | CYP2R1 | 4.59 | 1 | 57.3 | 7.61 | 0.00 | 0.00 | 0.00 | 0 | 0.00 | 0.00 | 0.00 | 0 | 0.00 | 0.00 | 0.00 | 0 | 0.00 | 0.17 | 0.17 | 1 | 0.00 | 0.04 | 0.04 | 1 |
| A0A0G2JNL1 | Leukocyte immunoglobulin-like receptor subfamily B member 4 | LILRB4 | 5.86 | 1 | 52.5 | 6.57 | 0.00 | 0.17 | 0.17 | 1 | 0.00 | 0.00 | 0.00 | 0 | 0.00 | 0.00 | 0.00 | 0 | 0.00 | 0.00 | 0.00 | 0 | 0.00 | 0.04 | 0.04 | 1 |
| Q70CQ2 | Ubiquitin carboxyl-terminal hydrolase 34 | USP34 | 0.76 | 1 | 404.0 | 5.82 | 0.00 | 0.00 | 0.00 | 0 | 0.00 | 0.17 | 0.17 | 1 | 0.00 | 0.00 | 0.00 | 0 | 0.00 | 0.00 | 0.00 | 0 | 0.00 | 0.04 | 0.04 | 1 |
| Q9NZD2 | Glycolipid transfer protein | GLTP | 12.92 | 1 | 23.8 | 7.39 | 0.00 | 0.00 | 0.00 | 0 | 0.00 | 0.17 | 0.17 | 1 | 0.00 | 0.00 | 0.00 | 0 | 0.00 | 0.00 | 0.00 | 0 | 0.00 | 0.04 | 0.04 | 1 |
| P25815 | Protein S100-P | S100P | 17.89 | 1 | 10.4 | 4.88 | 0.00 | 0.00 | 0.00 | 0 | 0.30 | 0.17 | 0.17 | 1 | 0.00 | 0.00 | 0.00 | 0 | 0.00 | 0.00 | 0.00 | 0 | 0.07 | 0.04 | 0.04 | 1 |
| O14682 | Ectoderm-neural cortex protein 1 | ENC1 | 3.57 | 1 | 66.1 | 6.84 | 0.00 | 0.00 | 0.00 | 0 | 0.00 | 0.00 | 0.00 | 0 | 0.00 | 0.17 | 0.17 | 1 | 0.00 | 0.00 | 0.00 | 0 | 0.00 | 0.04 | 0.04 | 1 |
| Q8N5I4 | Dehydrogenase/reductase SDR family member on chromosome X | DHRSX | 9.09 | 1 | 36.4 | 9.00 | 0.00 | 0.00 | 0.00 | 0 | 0.00 | 0.00 | 0.00 | 0 | 0.37 | 0.17 | 0.17 | 1 | 0.00 | 0.00 | 0.00 | 0 | 0.09 | 0.04 | 0.04 | 1 |
| Q8TED4 | Glucose-6-phosphate exchanger SLC37A2 | SLC37A2 | 5.39 | 1 | 54.4 | 6.81 | 0.00 | 0.00 | 0.00 | 0 | 0.00 | 0.00 | 0.00 | 0 | 0.00 | 0.00 | 0.00 | 0 | 0.00 | 0.17 | 0.17 | 1 | 0.00 | 0.04 | 0.04 | 1 |
| Q5T5J6 | Transcriptional protein SWT1 | SWT1 | 2.33 | 1 | 103.2 | 8.81 | 0.00 | 0.00 | 0.00 | 0 | 0.00 | 0.00 | 0.00 | 0 | 0.00 | 0.00 | 0.00 | 0 | 0.00 | 0.17 | 0.17 | 1 | 0.00 | 0.04 | 0.04 | 1 |
| P50914 | 60S ribosomal protein L14 | RPL14 | 5.58 | 1 | 23.4 | 10.93 | 0.00 | 0.00 | 0.00 | 0 | 0.32 | 0.17 | 0.17 | 1 | 0.00 | 0.00 | 0.00 | 0 | 0.00 | 0.00 | 0.00 | 0 | 0.08 | 0.04 | 0.04 | 1 |
| H0UI06 | Cytochrome c oxidase subunit 7A2, mitochondrial | COX7A2 | 11.30 | 1 | 12.8 | 9.13 | 0.00 | 0.17 | 0.17 | 1 | 0.00 | 0.00 | 0.00 | 0 | 0.00 | 0.00 | 0.00 | 0 | 0.00 | 0.00 | 0.00 | 0 | 0.00 | 0.04 | 0.04 | 1 |
| O00443 | Phosphatidylinositol 4-phosphate 3-kinase C2 domain-containing subunit alpha | PIK3C2A | 0.95 | 1 | 190.6 | 8.02 | 0.29 | 0.17 | 0.17 | 1 | 0.00 | 0.00 | 0.00 | 0 | 0.00 | 0.00 | 0.00 | 0 | 0.00 | 0.00 | 0.00 | 0 | 0.07 | 0.04 | 0.04 | 1 |
| Q6ZRQ5 | Protein MMS22-like | MMS22L | 1.29 | 1 | 142.2 | 7.12 | 0.00 | 0.00 | 0.00 | 0 | 0.00 | 0.17 | 0.17 | 1 | 0.00 | 0.00 | 0.00 | 0 | 0.00 | 0.00 | 0.00 | 0 | 0.00 | 0.04 | 0.04 | 1 |
| P09382 | Galectin-1 | LGALS1 | 11.85 | 1 | 14.7 | 5.50 | 0.00 | 0.00 | 0.00 | 0 | 0.00 | 0.00 | 0.00 | 0 | 0.00 | 0.00 | 0.00 | 0 | 0.00 | 0.17 | 0.17 | 1 | 0.00 | 0.04 | 0.04 | 1 |
| E9PKV3 | Suppression of tumorigenicity 5 protein (Fragment) | ST5 | 21.05 | 1 | 8.1 | 5.01 | 0.00 | 0.00 | 0.00 | 0 | 0.00 | 0.17 | 0.17 | 1 | 0.00 | 0.00 | 0.00 | 0 | 0.00 | 0.00 | 0.00 | 0 | 0.00 | 0.04 | 0.04 | 1 |
| Q6PL18 | ATPase family AAA domain-containing protein 2 | ATAD2 | 1.58 | 1 | 158.5 | 6.32 | 0.00 | 0.17 | 0.17 | 1 | 0.00 | 0.00 | 0.00 | 0 | 0.00 | 0.00 | 0.00 | 0 | 0.00 | 0.00 | 0.00 | 0 | 0.00 | 0.04 | 0.04 | 1 |
| A0A0A0MRM9 | Nucleolar and coiled-body phosphoprotein 1 (Fragment) | NOLC1 | 2.12 | 1 | 74.6 | 9.47 | 0.00 | 0.00 | 0.00 | 0 | 0.00 | 0.00 | 0.00 | 0 | 0.28 | 0.17 | 0.17 | 1 | 0.00 | 0.00 | 0.00 | 0 | 0.07 | 0.04 | 0.04 | 1 |
| Q9H1B7 | Interferon regulatory factor 2-binding protein-like | IRF2BPL | 3.27 | 1 | 82.6 | 8.24 | 0.00 | 0.00 | 0.00 | 0 | 0.00 | 0.00 | 0.00 | 0 | 0.00 | 0.00 | 0.00 | 0 | 0.00 | 0.17 | 0.17 | 1 | 0.00 | 0.04 | 0.04 | 1 |
| A0A182DWE8 | Cilia- and flagella-associated protein 47 | CFAP47 | 2.39 | 1 | 58.0 | 6.90 | 0.00 | 0.00 | 0.00 | 0 | 0.00 | 0.00 | 0.00 | 0 | 0.00 | 0.00 | 0.00 | 0 | 0.00 | 0.17 | 0.17 | 1 | 0.00 | 0.04 | 0.04 | 1 |
| Q00722 | 1-phosphatidylinositol 4,5-bisphosphate phosphodiesterase beta-2 | PLCB2 | 2.45 | 1 | 133.9 | 6.29 | 0.00 | 0.17 | 0.17 | 1 | 0.00 | 0.00 | 0.00 | 0 | 0.00 | 0.00 | 0.00 | 0 | 0.00 | 0.00 | 0.00 | 0 | 0.00 | 0.04 | 0.04 | 1 |
| O96007 | Molybdopterin synthase catalytic subunit | MOCS2 | 10.11 | 1 | 20.9 | 5.44 | 0.00 | 0.00 | 0.00 | 0 | 0.00 | 0.00 | 0.00 | 0 | 0.00 | 0.17 | 0.17 | 1 | 0.00 | 0.00 | 0.00 | 0 | 0.00 | 0.04 | 0.04 | 1 |
| P31995 | Low affinity immunoglobulin gamma Fc region receptor II-c | FCGR2C | 6.81 | 1 | 35.6 | 6.90 | 0.00 | 0.00 | 0.00 | 0 | 0.00 | 0.17 | 0.17 | 1 | 0.00 | 0.00 | 0.00 | 0 | 0.00 | 0.00 | 0.00 | 0 | 0.00 | 0.04 | 0.04 | 1 |
| Q96G03 | Phosphoglucomutase-2 | PGM2 | 3.10 | 1 | 68.2 | 6.73 | 0.28 | 0.17 | 0.17 | 1 | 0.00 | 0.00 | 0.00 | 0 | 0.00 | 0.00 | 0.00 | 0 | 0.00 | 0.00 | 0.00 | 0 | 0.07 | 0.04 | 0.04 | 1 |
| Q6P0N0 | Mis18-binding protein 1 | MIS18BP1 | 1.24 | 1 | 129.0 | 9.25 | 0.00 | 0.00 | 0.00 | 0 | 0.00 | 0.17 | 0.17 | 1 | 0.00 | 0.00 | 0.00 | 0 | 0.00 | 0.00 | 0.00 | 0 | 0.00 | 0.04 | 0.04 | 1 |
| Q96N66 | Lysophospholipid acyltransferase 7 | MBOAT7 | 4.66 | 1 | 52.7 | 8.97 | 0.00 | 0.00 | 0.00 | 0 | 0.00 | 0.17 | 0.17 | 1 | 0.00 | 0.00 | 0.00 | 0 | 0.00 | 0.00 | 0.00 | 0 | 0.00 | 0.04 | 0.04 | 1 |
| Q9NZP8 | Complement C1r subcomponent-like protein | C1RL | 4.52 | 1 | 53.5 | 7.20 | 0.00 | 0.00 | 0.00 | 0 | 0.00 | 0.00 | 0.00 | 0 | 0.00 | 0.00 | 0.00 | 0 | 0.00 | 0.17 | 0.17 | 1 | 0.00 | 0.04 | 0.04 | 1 |
| R4GN03 | E3 ubiquitin-protein ligase TRIM8 (Fragment) | TRIM8 | 12.88 | 1 | 32.8 | 7.87 | 0.00 | 0.00 | 0.00 | 0 | 0.39 | 0.17 | 0.17 | 1 | 0.00 | 0.00 | 0.00 | 0 | 0.00 | 0.00 | 0.00 | 0 | 0.10 | 0.04 | 0.04 | 1 |
| R4GMQ1 | Lysine-specific histone demethylase | KDM1A | 1.75 | 1 | 93.5 | 6.51 | 0.00 | 0.00 | 0.00 | 0 | 0.00 | 0.00 | 0.00 | 0 | 0.00 | 0.17 | 0.17 | 1 | 0.00 | 0.00 | 0.00 | 0 | 0.00 | 0.04 | 0.04 | 1 |
| M0QY55 | Adhesion G protein-coupled receptor E2 (Fragment) | ADGRE2 | 9.39 | 1 | 36.7 | 6.60 | 0.00 | 0.00 | 0.00 | 0 | 0.00 | 0.00 | 0.00 | 0 | 0.00 | 0.00 | 0.00 | 0 | 0.00 | 0.17 | 0.17 | 1 | 0.00 | 0.04 | 0.04 | 1 |
| P07741 | Adenine phosphoribosyltransferase | APRT | 7.22 | 1 | 19.6 | 6.02 | 0.00 | 0.17 | 0.17 | 1 | 0.00 | 0.00 | 0.00 | 0 | 0.00 | 0.00 | 0.00 | 0 | 0.00 | 0.00 | 0.00 | 0 | 0.00 | 0.04 | 0.04 | 1 |
| Q8TE99 | 2-phosphoxylose phosphatase 1 | PXYLP1 | 2.71 | 1 | 55.2 | 8.98 | 0.00 | 0.17 | 0.17 | 1 | 0.00 | 0.00 | 0.00 | 0 | 0.00 | 0.00 | 0.00 | 0 | 0.00 | 0.00 | 0.00 | 0 | 0.00 | 0.04 | 0.04 | 1 |
| P63208 | S-phase kinase-associated protein 1 | SKP1 | 11.66 | 1 | 18.6 | 4.54 | 0.00 | 0.00 | 0.00 | 0 | 0.00 | 0.00 | 0.00 | 0 | 0.00 | 0.00 | 0.00 | 0 | 0.30 | 0.17 | 0.17 | 1 | 0.08 | 0.04 | 0.04 | 1 |
| Q8TAP6 | Centrosomal protein of 76 kDa | CEP76 | 3.64 | 1 | 74.4 | 6.74 | 0.42 | 0.17 | 0.17 | 1 | 0.00 | 0.00 | 0.00 | 0 | 0.00 | 0.00 | 0.00 | 0 | 0.00 | 0.00 | 0.00 | 0 | 0.10 | 0.04 | 0.04 | 1 |
| B7Z4C8 | cDNA FLJ57527, highly similar to 60S ribosomal protein L31 | RPL31 | 10.77 | 1 | 15.1 | 10.37 | 0.00 | 0.00 | 0.00 | 0 | 0.00 | 0.00 | 0.00 | 0 | 0.00 | 0.00 | 0.00 | 0 | 0.00 | 0.17 | 0.17 | 1 | 0.00 | 0.04 | 0.04 | 1 |
| P52961 | GPI-linked NAD(P)(+)--arginine ADP-ribosyltransferase 1 | ART1 | 6.42 | 1 | 36.3 | 8.28 | 0.00 | 0.00 | 0.00 | 0 | 0.00 | 0.17 | 0.17 | 1 | 0.00 | 0.00 | 0.00 | 0 | 0.00 | 0.00 | 0.00 | 0 | 0.00 | 0.04 | 0.04 | 1 |
| Q96JQ0 | Protocadherin-16 | DCHS1 | 0.79 | 1 | 346.0 | 4.94 | 0.00 | 0.00 | 0.00 | 0 | 0.00 | 0.17 | 0.17 | 1 | 0.00 | 0.00 | 0.00 | 0 | 0.00 | 0.00 | 0.00 | 0 | 0.00 | 0.04 | 0.04 | 1 |
| Q9P2U8 | Vesicular glutamate transporter 2 | SLC17A6 | 4.30 | 1 | 64.4 | 7.05 | 0.00 | 0.00 | 0.00 | 0 | 0.35 | 0.17 | 0.17 | 1 | 0.00 | 0.00 | 0.00 | 0 | 0.00 | 0.00 | 0.00 | 0 | 0.09 | 0.04 | 0.04 | 1 |
| H7BXI7 | Ly6/PLAUR domain-containing protein 6B | LYPD6B | 15.30 | 1 | 20.7 | 7.94 | 0.00 | 0.00 | 0.00 | 0 | 0.00 | 0.00 | 0.00 | 0 | 0.00 | 0.17 | 0.17 | 1 | 0.00 | 0.00 | 0.00 | 0 | 0.00 | 0.04 | 0.04 | 1 |
| Q99075 | Proheparin-binding EGF-like growth factor | HBEGF | 15.38 | 1 | 23.1 | 9.38 | 0.00 | 0.17 | 0.17 | 1 | 0.00 | 0.00 | 0.00 | 0 | 0.00 | 0.00 | 0.00 | 0 | 0.00 | 0.00 | 0.00 | 0 | 0.00 | 0.04 | 0.04 | 1 |
| O75396 | Vesicle-trafficking protein SEC22b | SEC22B | 5.58 | 1 | 24.6 | 6.92 | 0.00 | 0.00 | 0.00 | 0 | 0.00 | 0.00 | 0.00 | 0 | 0.00 | 0.00 | 0.00 | 0 | 0.00 | 0.17 | 0.17 | 1 | 0.00 | 0.04 | 0.04 | 1 |
| P54707 | Potassium-transporting ATPase alpha chain 2 | ATP12A | 1.35 | 1 | 115.4 | 6.55 | 0.00 | 0.00 | 0.00 | 0 | 0.00 | 0.00 | 0.00 | 0 | 0.28 | 0.17 | 0.17 | 1 | 0.00 | 0.00 | 0.00 | 0 | 0.07 | 0.04 | 0.04 | 1 |
| O60687 | Sushi repeat-containing protein SRPX2 | SRPX2 | 3.87 | 1 | 52.9 | 7.25 | 0.00 | 0.00 | 0.00 | 0 | 0.00 | 0.00 | 0.00 | 0 | 0.00 | 0.00 | 0.00 | 0 | 0.29 | 0.17 | 0.17 | 1 | 0.07 | 0.04 | 0.04 | 1 |
| Q658J9 | Histone deacetylase 11, isoform CRA_b | HDAC11 | 11.44 | 1 | 25.9 | 10.62 | 0.00 | 0.00 | 0.00 | 0 | 0.00 | 0.00 | 0.00 | 0 | 0.00 | 0.17 | 0.17 | 1 | 0.00 | 0.00 | 0.00 | 0 | 0.00 | 0.04 | 0.04 | 1 |
| O15354 | Prosaposin receptor GPR37 | GPR37 | 2.94 | 1 | 67.1 | 8.27 | 0.00 | 0.00 | 0.00 | 0 | 0.00 | 0.17 | 0.17 | 1 | 0.00 | 0.00 | 0.00 | 0 | 0.00 | 0.00 | 0.00 | 0 | 0.00 | 0.04 | 0.04 | 1 |
| P12277 | Creatine kinase B-type | CKB | 4.46 | 1 | 42.6 | 5.59 | 0.32 | 0.17 | 0.17 | 1 | 0.00 | 0.00 | 0.00 | 0 | 0.00 | 0.00 | 0.00 | 0 | 0.00 | 0.00 | 0.00 | 0 | 0.08 | 0.04 | 0.04 | 1 |
| D6RE76 | Myotubularin-related protein 12 | MTMR12 | 64.10 | 1 | 4.0 | 8.56 | 0.00 | 0.00 | 0.00 | 0 | 0.00 | 0.00 | 0.00 | 0 | 0.00 | 0.00 | 0.00 | 0 | 0.00 | 0.17 | 0.17 | 1 | 0.00 | 0.04 | 0.04 | 1 |
| Q71RG4 | Transmembrane and ubiquitin-like domain-containing protein 2 | TMUB2 | 6.54 | 1 | 33.8 | 5.03 | 0.00 | 0.00 | 0.00 | 0 | 0.29 | 0.17 | 0.17 | 1 | 0.00 | 0.00 | 0.00 | 0 | 0.00 | 0.00 | 0.00 | 0 | 0.07 | 0.04 | 0.04 | 1 |
| O75129 | Astrotactin-2 | ASTN2 | 2.17 | 1 | 148.1 | 5.97 | 0.00 | 0.00 | 0.00 | 0 | 0.00 | 0.00 | 0.00 | 0 | 0.00 | 0.00 | 0.00 | 0 | 0.00 | 0.17 | 0.17 | 1 | 0.00 | 0.04 | 0.04 | 1 |
| O95433 | Activator of 90 kDa heat shock protein ATPase homolog 1 | AHSA1 | 6.51 | 1 | 38.3 | 5.53 | 0.00 | 0.00 | 0.00 | 0 | 0.00 | 0.00 | 0.00 | 0 | 0.00 | 0.00 | 0.00 | 0 | 0.33 | 0.17 | 0.17 | 1 | 0.08 | 0.04 | 0.04 | 1 |
| P54136 | Arginine--tRNA ligase, cytoplasmic | RARS | 1.67 | 1 | 75.3 | 6.68 | 0.00 | 0.00 | 0.00 | 0 | 0.00 | 0.00 | 0.00 | 0 | 0.00 | 0.00 | 0.00 | 0 | 0.32 | 0.17 | 0.17 | 1 | 0.08 | 0.04 | 0.04 | 1 |
| P07814 | Bifunctional glutamate/proline--tRNA ligase | EPRS | 1.85 | 1 | 170.5 | 7.33 | 0.35 | 0.17 | 0.17 | 1 | 0.00 | 0.00 | 0.00 | 0 | 0.00 | 0.00 | 0.00 | 0 | 0.00 | 0.00 | 0.00 | 0 | 0.09 | 0.04 | 0.04 | 1 |
| A0A2R8YF61 | Cyclin-dependent kinase 13 (Fragment) | CDK13 | 1.86 | 1 | 101.5 | 6.80 | 0.00 | 0.00 | 0.00 | 0 | 0.00 | 0.17 | 0.17 | 1 | 0.00 | 0.00 | 0.00 | 0 | 0.00 | 0.00 | 0.00 | 0 | 0.00 | 0.04 | 0.04 | 1 |
| D6RJG4 | Protein kinase C zeta type | PRKCZ | 26.03 | 1 | 8.1 | 6.49 | 0.00 | 0.00 | 0.00 | 0 | 0.00 | 0.00 | 0.00 | 0 | 0.00 | 0.00 | 0.00 | 0 | 0.00 | 0.17 | 0.17 | 1 | 0.00 | 0.04 | 0.04 | 1 |
| P28336 | Neuromedin-B receptor | NMBR | 4.10 | 1 | 43.4 | 8.66 | 0.00 | 0.17 | 0.17 | 1 | 0.00 | 0.00 | 0.00 | 0 | 0.00 | 0.00 | 0.00 | 0 | 0.00 | 0.00 | 0.00 | 0 | 0.00 | 0.04 | 0.04 | 1 |
| B7ZC32 | Kinesin-like protein KIF28P | KIF28P | 1.14 | 1 | 108.2 | 8.43 | 0.00 | 0.00 | 0.00 | 0 | 0.00 | 0.00 | 0.00 | 0 | 0.00 | 0.00 | 0.00 | 0 | 0.00 | 0.17 | 0.17 | 1 | 0.00 | 0.04 | 0.04 | 1 |
| Q32MH5 | Protein FAM214A | FAM214A | 2.42 | 1 | 121.6 | 7.90 | 0.00 | 0.00 | 0.00 | 0 | 0.00 | 0.00 | 0.00 | 0 | 0.00 | 0.17 | 0.17 | 1 | 0.00 | 0.00 | 0.00 | 0 | 0.00 | 0.04 | 0.04 | 1 |
| O60347 | TBC1 domain family member 12 | TBC1D12 | 4.26 | 1 | 85.6 | 5.74 | 0.00 | 0.17 | 0.17 | 1 | 0.00 | 0.00 | 0.00 | 0 | 0.00 | 0.00 | 0.00 | 0 | 0.00 | 0.00 | 0.00 | 0 | 0.00 | 0.04 | 0.04 | 1 |
| Q9UPX6 | Major intrinsically disordered Notch2-binding receptor 1 | MINAR1 | 2.07 | 1 | 102.9 | 7.31 | 0.00 | 0.17 | 0.17 | 1 | 0.00 | 0.00 | 0.00 | 0 | 0.00 | 0.00 | 0.00 | 0 | 0.00 | 0.00 | 0.00 | 0 | 0.00 | 0.04 | 0.04 | 1 |
| Q9HAJ7 | Histone deacetylase complex subunit SAP30L | SAP30L | 15.85 | 1 | 20.9 | 9.36 | 0.00 | 0.00 | 0.00 | 0 | 0.00 | 0.17 | 0.17 | 1 | 0.00 | 0.00 | 0.00 | 0 | 0.00 | 0.00 | 0.00 | 0 | 0.00 | 0.04 | 0.04 | 1 |
| P62266 | 40S ribosomal protein S23 | RPS23 | 7.69 | 1 | 15.8 | 10.49 | 0.00 | 0.00 | 0.00 | 0 | 0.00 | 0.00 | 0.00 | 0 | 0.00 | 0.17 | 0.17 | 1 | 0.00 | 0.00 | 0.00 | 0 | 0.00 | 0.04 | 0.04 | 1 |
| A8MV23 | Serpin E3 | SERPINE3 | 5.66 | 1 | 46.9 | 7.18 | 0.00 | 0.00 | 0.00 | 0 | 0.00 | 0.00 | 0.00 | 0 | 0.36 | 0.17 | 0.17 | 1 | 0.00 | 0.00 | 0.00 | 0 | 0.09 | 0.04 | 0.04 | 1 |
| P45973 | Chromobox protein homolog 5 | CBX5 | 8.90 | 1 | 22.2 | 5.86 | 0.28 | 0.17 | 0.17 | 1 | 0.00 | 0.00 | 0.00 | 0 | 0.00 | 0.00 | 0.00 | 0 | 0.00 | 0.00 | 0.00 | 0 | 0.07 | 0.04 | 0.04 | 1 |
| Q9BZH6 | WD repeat-containing protein 11 | WDR11 | 1.72 | 1 | 136.6 | 6.92 | 0.00 | 0.00 | 0.00 | 0 | 0.00 | 0.17 | 0.17 | 1 | 0.00 | 0.00 | 0.00 | 0 | 0.00 | 0.00 | 0.00 | 0 | 0.00 | 0.04 | 0.04 | 1 |
| F2Z2X0 | Nucleoside diphosphate kinase | NME4 | 11.16 | 1 | 25.4 | 11.05 | 0.00 | 0.00 | 0.00 | 0 | 0.00 | 0.00 | 0.00 | 0 | 0.00 | 0.00 | 0.00 | 0 | 0.34 | 0.17 | 0.17 | 1 | 0.09 | 0.04 | 0.04 | 1 |
| A0A096LNH0 | Protocadherin-23 | DCHS2 | 0.71 | 1 | 370.0 | 4.77 | 0.00 | 0.00 | 0.00 | 0 | 0.00 | 0.00 | 0.00 | 0 | 0.00 | 0.17 | 0.17 | 1 | 0.00 | 0.00 | 0.00 | 0 | 0.00 | 0.04 | 0.04 | 1 |
| Q9C0G6 | Dynein heavy chain 6, axonemal | DNAH6 | 0.53 | 1 | 475.7 | 6.00 | 0.00 | 0.17 | 0.17 | 1 | 0.00 | 0.00 | 0.00 | 0 | 0.00 | 0.00 | 0.00 | 0 | 0.00 | 0.00 | 0.00 | 0 | 0.00 | 0.04 | 0.04 | 1 |
| Q9HB71 | Calcyclin-binding protein | CACYBP | 10.09 | 1 | 26.2 | 8.25 | 0.00 | 0.00 | 0.00 | 0 | 0.37 | 0.17 | 0.17 | 1 | 0.00 | 0.00 | 0.00 | 0 | 0.00 | 0.00 | 0.00 | 0 | 0.09 | 0.04 | 0.04 | 1 |
| P52735 | Guanine nucleotide exchange factor VAV2 | VAV2 | 1.59 | 1 | 101.2 | 7.08 | 0.00 | 0.00 | 0.00 | 0 | 0.00 | 0.00 | 0.00 | 0 | 0.00 | 0.00 | 0.00 | 0 | 0.00 | 0.17 | 0.17 | 1 | 0.00 | 0.04 | 0.04 | 1 |
| A0A1B0GTK1 | Voltage-dependent L-type calcium channel subunit beta-4 | CACNB4 | 3.31 | 1 | 47.2 | 6.87 | 0.00 | 0.00 | 0.00 | 0 | 0.00 | 0.00 | 0.00 | 0 | 0.00 | 0.00 | 0.00 | 0 | 0.00 | 0.17 | 0.17 | 1 | 0.00 | 0.04 | 0.04 | 1 |
| Q9NPI1 | Bromodomain-containing protein 7 | BRD7 | 3.53 | 1 | 74.1 | 6.39 | 0.00 | 0.00 | 0.00 | 0 | 0.35 | 0.17 | 0.17 | 1 | 0.00 | 0.00 | 0.00 | 0 | 0.00 | 0.00 | 0.00 | 0 | 0.09 | 0.04 | 0.04 | 1 |
| Q8ND25 | E3 ubiquitin-protein ligase ZNRF1 | ZNRF1 | 14.10 | 1 | 23.8 | 6.67 | 0.00 | 0.00 | 0.00 | 0 | 0.00 | 0.00 | 0.00 | 0 | 0.00 | 0.17 | 0.17 | 1 | 0.00 | 0.00 | 0.00 | 0 | 0.00 | 0.04 | 0.04 | 1 |
| Q96S52 | GPI transamidase component PIG-S | PIGS | 3.78 | 1 | 61.6 | 6.49 | 0.00 | 0.17 | 0.17 | 1 | 0.00 | 0.00 | 0.00 | 0 | 0.00 | 0.00 | 0.00 | 0 | 0.00 | 0.00 | 0.00 | 0 | 0.00 | 0.04 | 0.04 | 1 |
| H0YFK7 | Wnt inhibitory factor 1 (Fragment) | WIF1 | 14.06 | 1 | 14.0 | 8.09 | 0.27 | 0.17 | 0.17 | 1 | 0.00 | 0.00 | 0.00 | 0 | 0.00 | 0.00 | 0.00 | 0 | 0.00 | 0.00 | 0.00 | 0 | 0.07 | 0.04 | 0.04 | 1 |
| O75936 | Gamma-butyrobetaine dioxygenase | BBOX1 | 6.72 | 1 | 44.7 | 6.74 | 0.00 | 0.00 | 0.00 | 0 | 0.00 | 0.00 | 0.00 | 0 | 0.00 | 0.17 | 0.17 | 1 | 0.00 | 0.00 | 0.00 | 0 | 0.00 | 0.04 | 0.04 | 1 |
| P36542 | ATP synthase subunit gamma, mitochondrial | ATP5F1C | 10.40 | 1 | 33.0 | 9.22 | 0.35 | 0.17 | 0.17 | 1 | 0.00 | 0.00 | 0.00 | 0 | 0.00 | 0.00 | 0.00 | 0 | 0.00 | 0.00 | 0.00 | 0 | 0.09 | 0.04 | 0.04 | 1 |
| D3DX46 | Membrane protein, palmitoylated 3 (MAGUK p55 subfamily member 3), isoform CRA_a | MPP3 | 5.08 | 1 | 68.8 | 6.81 | 0.00 | 0.00 | 0.00 | 0 | 0.00 | 0.00 | 0.00 | 0 | 0.00 | 0.00 | 0.00 | 0 | 0.00 | 0.17 | 0.17 | 1 | 0.00 | 0.04 | 0.04 | 1 |
| Q86XD8 | AN1-type zinc finger protein 4 | ZFAND4 | 2.48 | 1 | 80.3 | 8.35 | 0.00 | 0.00 | 0.00 | 0 | 0.00 | 0.00 | 0.00 | 0 | 0.38 | 0.17 | 0.17 | 1 | 0.00 | 0.00 | 0.00 | 0 | 0.10 | 0.04 | 0.04 | 1 |
| O95857 | Tetraspanin-13 | TSPAN13 | 12.25 | 1 | 22.1 | 7.93 | 0.00 | 0.00 | 0.00 | 0 | 0.00 | 0.00 | 0.00 | 0 | 0.00 | 0.00 | 0.00 | 0 | 0.00 | 0.17 | 0.17 | 1 | 0.00 | 0.04 | 0.04 | 1 |
| Q4KWH8 | 1-phosphatidylinositol 4,5-bisphosphate phosphodiesterase eta-1 | PLCH1 | 1.12 | 1 | 189.1 | 7.74 | 0.00 | 0.00 | 0.00 | 0 | 0.00 | 0.00 | 0.00 | 0 | 0.00 | 0.17 | 0.17 | 1 | 0.00 | 0.00 | 0.00 | 0 | 0.00 | 0.04 | 0.04 | 1 |
| A0A0D9SEX9 | Zinc finger protein GLIS1 | GLIS1 | 4.15 | 1 | 84.4 | 7.88 | 0.00 | 0.17 | 0.17 | 1 | 0.00 | 0.00 | 0.00 | 0 | 0.00 | 0.00 | 0.00 | 0 | 0.00 | 0.00 | 0.00 | 0 | 0.00 | 0.04 | 0.04 | 1 |
| Q8N3C0 | Activating sial cointegrator 1 complex subunit 3 | ASCC3 | 0.86 | 1 | 251.3 | 7.09 | 0.00 | 0.00 | 0.00 | 0 | 0.00 | 0.00 | 0.00 | 0 | 0.00 | 0.00 | 0.00 | 0 | 0.00 | 0.17 | 0.17 | 1 | 0.00 | 0.04 | 0.04 | 1 |
| P50461 | Cysteine and glycine-rich protein 3 | CSRP3 | 9.28 | 1 | 21.0 | 8.54 | 0.00 | 0.00 | 0.00 | 0 | 0.29 | 0.17 | 0.17 | 1 | 0.00 | 0.00 | 0.00 | 0 | 0.00 | 0.00 | 0.00 | 0 | 0.07 | 0.04 | 0.04 | 1 |
| Q8TE23 | Taste receptor type 1 member 2 | TAS1R2 | 2.98 | 1 | 95.1 | 6.52 | 0.00 | 0.17 | 0.17 | 1 | 0.00 | 0.00 | 0.00 | 0 | 0.00 | 0.00 | 0.00 | 0 | 0.00 | 0.00 | 0.00 | 0 | 0.00 | 0.04 | 0.04 | 1 |
| Q6NW34 | Nucleolus and neural progenitor protein | NEPRO | 4.59 | 1 | 64.5 | 9.74 | 0.00 | 0.00 | 0.00 | 0 | 0.00 | 0.17 | 0.17 | 1 | 0.00 | 0.00 | 0.00 | 0 | 0.00 | 0.00 | 0.00 | 0 | 0.00 | 0.04 | 0.04 | 1 |
| Q03001 | Dystonin | DST | 0.30 | 1 | 860.1 | 5.25 | 0.00 | 0.00 | 0.00 | 0 | 0.00 | 0.00 | 0.00 | 0 | 0.00 | 0.17 | 0.17 | 1 | 0.00 | 0.00 | 0.00 | 0 | 0.00 | 0.04 | 0.04 | 1 |
| P23471 | Receptor-type tyrosine-protein phosphatase zeta | PTPRZ1 | 0.95 | 1 | 254.4 | 4.88 | 0.00 | 0.17 | 0.17 | 1 | 0.00 | 0.00 | 0.00 | 0 | 0.00 | 0.00 | 0.00 | 0 | 0.00 | 0.00 | 0.00 | 0 | 0.00 | 0.04 | 0.04 | 1 |
| Q7Z6V5 | tRNA-specific adenosine deaminase 2 | ADAT2 | 13.61 | 1 | 21.0 | 6.74 | 0.00 | 0.00 | 0.00 | 0 | 0.00 | 0.17 | 0.17 | 1 | 0.00 | 0.00 | 0.00 | 0 | 0.00 | 0.00 | 0.00 | 0 | 0.00 | 0.04 | 0.04 | 1 |
| P17612 | cAMP-dependent protein kinase catalytic subunit alpha | PRKACA | 3.42 | 1 | 40.6 | 8.79 | 0.00 | 0.17 | 0.17 | 1 | 0.00 | 0.00 | 0.00 | 0 | 0.00 | 0.00 | 0.00 | 0 | 0.00 | 0.00 | 0.00 | 0 | 0.00 | 0.04 | 0.04 | 1 |
| A8MTA8 | Protein FAM166B | FAM166B | 7.64 | 1 | 30.6 | 8.28 | 0.00 | 0.00 | 0.00 | 0 | 0.00 | 0.00 | 0.00 | 0 | 0.00 | 0.00 | 0.00 | 0 | 0.34 | 0.17 | 0.17 | 1 | 0.08 | 0.04 | 0.04 | 1 |
| Q9UPM9 | B9 domain-containing protein 1 | B9D1 | 12.75 | 1 | 22.8 | 7.28 | 0.00 | 0.00 | 0.00 | 0 | 0.00 | 0.00 | 0.00 | 0 | 0.00 | 0.17 | 0.17 | 1 | 0.00 | 0.00 | 0.00 | 0 | 0.00 | 0.04 | 0.04 | 1 |
| Q15427 | Splicing factor 3B subunit 4 | SF3B4 | 5.42 | 1 | 44.4 | 8.56 | 0.00 | 0.00 | 0.00 | 0 | 0.34 | 0.17 | 0.17 | 1 | 0.00 | 0.00 | 0.00 | 0 | 0.00 | 0.00 | 0.00 | 0 | 0.08 | 0.04 | 0.04 | 1 |
| D6W592 | Heterogeneous nuclear ribonucleoprotein L-like, isoform CRA_d | HNRNPLL | 4.06 | 1 | 60.1 | 7.85 | 0.00 | 0.17 | 0.17 | 1 | 0.00 | 0.00 | 0.00 | 0 | 0.00 | 0.00 | 0.00 | 0 | 0.00 | 0.00 | 0.00 | 0 | 0.00 | 0.04 | 0.04 | 1 |
| A6NDE4 | RNA-binding motif protein, Y chromosome, family 1 member B | RBMY1B | 5.04 | 1 | 55.8 | 9.95 | 0.00 | 0.00 | 0.00 | 0 | 0.00 | 0.17 | 0.17 | 1 | 0.00 | 0.00 | 0.00 | 0 | 0.00 | 0.00 | 0.00 | 0 | 0.00 | 0.04 | 0.04 | 1 |
| Q9BQ87 | F-box-like/WD repeat-containing protein TBL1Y | TBL1Y | 5.17 | 1 | 56.7 | 5.62 | 0.00 | 0.00 | 0.00 | 0 | 0.37 | 0.17 | 0.17 | 1 | 0.00 | 0.00 | 0.00 | 0 | 0.00 | 0.00 | 0.00 | 0 | 0.09 | 0.04 | 0.04 | 1 |
| Q8N5C8 | TGF-beta-activated kinase 1 and MAP3K7-binding protein 3 | TAB3 | 2.39 | 1 | 78.6 | 8.54 | 0.00 | 0.17 | 0.17 | 1 | 0.00 | 0.00 | 0.00 | 0 | 0.00 | 0.00 | 0.00 | 0 | 0.00 | 0.00 | 0.00 | 0 | 0.00 | 0.04 | 0.04 | 1 |
| F5H1U9 | Multiple PDZ domain protein | MPDZ | 1.10 | 1 | 223.0 | 5.06 | 0.00 | 0.00 | 0.00 | 0 | 0.00 | 0.00 | 0.00 | 0 | 0.00 | 0.17 | 0.17 | 1 | 0.00 | 0.00 | 0.00 | 0 | 0.00 | 0.04 | 0.04 | 1 |
| P20472 | Parvalbumin alpha | PVALB | 7.27 | 1 | 12.1 | 5.19 | 0.28 | 0.17 | 0.17 | 1 | 0.00 | 0.00 | 0.00 | 0 | 0.00 | 0.00 | 0.00 | 0 | 0.00 | 0.00 | 0.00 | 0 | 0.07 | 0.04 | 0.04 | 1 |
| Q6ZRP5 | Putative uncharacterized protein FLJ46204 |  | 13.00 | 1 | 25.2 | 11.34 | 0.00 | 0.00 | 0.00 | 0 | 0.00 | 0.00 | 0.00 | 0 | 0.00 | 0.17 | 0.17 | 1 | 0.00 | 0.00 | 0.00 | 0 | 0.00 | 0.04 | 0.04 | 1 |
| P31939 | Bifunctional purine biosynthesis protein PURH | ATIC | 2.87 | 1 | 64.6 | 6.71 | 0.29 | 0.17 | 0.17 | 1 | 0.00 | 0.00 | 0.00 | 0 | 0.00 | 0.00 | 0.00 | 0 | 0.00 | 0.00 | 0.00 | 0 | 0.07 | 0.04 | 0.04 | 1 |
| O75715 | Epididymal secretory glutathione peroxidase | GPX5 | 5.43 | 1 | 25.2 | 8.65 | 0.00 | 0.00 | 0.00 | 0 | 0.29 | 0.17 | 0.17 | 1 | 0.00 | 0.00 | 0.00 | 0 | 0.00 | 0.00 | 0.00 | 0 | 0.07 | 0.04 | 0.04 | 1 |
| O43242 | 26S proteasome non-ATPase regulatory subunit 3 | PSMD3 | 4.12 | 1 | 60.9 | 8.44 | 0.00 | 0.00 | 0.00 | 0 | 0.00 | 0.17 | 0.17 | 1 | 0.00 | 0.00 | 0.00 | 0 | 0.00 | 0.00 | 0.00 | 0 | 0.00 | 0.04 | 0.04 | 1 |
| Q09161 | Nuclear cap-binding protein subunit 1 | NCBP1 | 1.52 | 1 | 91.8 | 6.43 | 0.00 | 0.00 | 0.00 | 0 | 0.00 | 0.00 | 0.00 | 0 | 0.29 | 0.17 | 0.17 | 1 | 0.00 | 0.00 | 0.00 | 0 | 0.07 | 0.04 | 0.04 | 1 |
| O15151 | Protein Mdm4 | MDM4 | 4.90 | 1 | 54.8 | 5.00 | 0.00 | 0.00 | 0.00 | 0 | 0.00 | 0.00 | 0.00 | 0 | 0.00 | 0.00 | 0.00 | 0 | 0.00 | 0.17 | 0.17 | 1 | 0.00 | 0.04 | 0.04 | 1 |
| D6RBA6 | Sodium channel and clathrin linker 1 | SCLT1 | 9.92 | 1 | 15.2 | 6.14 | 0.00 | 0.17 | 0.17 | 1 | 0.00 | 0.00 | 0.00 | 0 | 0.00 | 0.00 | 0.00 | 0 | 0.00 | 0.00 | 0.00 | 0 | 0.00 | 0.04 | 0.04 | 1 |
| P04275 | von Willebrand factor | VWF | 0.96 | 1 | 309.1 | 5.48 | 0.00 | 0.17 | 0.17 | 1 | 0.00 | 0.00 | 0.00 | 0 | 0.00 | 0.00 | 0.00 | 0 | 0.00 | 0.00 | 0.00 | 0 | 0.00 | 0.04 | 0.04 | 1 |
| P13861 | cAMP-dependent protein kinase type II-alpha regulatory subunit | PRKAR2A | 4.95 | 1 | 45.5 | 5.07 | 0.00 | 0.00 | 0.00 | 0 | 0.00 | 0.17 | 0.17 | 1 | 0.00 | 0.00 | 0.00 | 0 | 0.00 | 0.00 | 0.00 | 0 | 0.00 | 0.04 | 0.04 | 1 |
| O75367 | Core histone macro-H2A.1 | H2AFY | 6.45 | 1 | 39.6 | 9.79 | 0.00 | 0.17 | 0.17 | 1 | 0.00 | 0.00 | 0.00 | 0 | 0.00 | 0.00 | 0.00 | 0 | 0.00 | 0.00 | 0.00 | 0 | 0.00 | 0.04 | 0.04 | 1 |
| Q9C0C9 | (E3-independent) E2 ubiquitin-conjugating enzyme | UBE2O | 1.86 | 1 | 141.2 | 5.12 | 0.00 | 0.00 | 0.00 | 0 | 0.34 | 0.17 | 0.17 | 1 | 0.00 | 0.00 | 0.00 | 0 | 0.00 | 0.00 | 0.00 | 0 | 0.08 | 0.04 | 0.04 | 1 |
| P04080 | Cystatin-B | CSTB | 12.24 | 1 | 11.1 | 7.56 | 0.00 | 0.00 | 0.00 | 0 | 0.00 | 0.00 | 0.00 | 0 | 0.40 | 0.17 | 0.17 | 1 | 0.00 | 0.00 | 0.00 | 0 | 0.10 | 0.04 | 0.04 | 1 |
| R4GMU1 | GDH/6PGL endoplasmic bifunctional protein | H6PD | 1.12 | 1 | 90.1 | 7.23 | 0.00 | 0.00 | 0.00 | 0 | 0.00 | 0.00 | 0.00 | 0 | 0.00 | 0.00 | 0.00 | 0 | 0.00 | 0.17 | 0.17 | 1 | 0.00 | 0.04 | 0.04 | 1 |
| A0A2R8YFA9 | [F-actin]-monooxygenase MICAL2 | MICAL2 | 0.61 | 1 | 218.9 | 8.34 | 0.00 | 0.00 | 0.00 | 0 | 0.00 | 0.17 | 0.17 | 1 | 0.00 | 0.00 | 0.00 | 0 | 0.00 | 0.00 | 0.00 | 0 | 0.00 | 0.04 | 0.04 | 1 |
| P08493 | Matrix Gla protein | MGP | 10.68 | 1 | 12.3 | 9.67 | 0.00 | 0.00 | 0.00 | 0 | 0.00 | 0.17 | 0.17 | 1 | 0.00 | 0.00 | 0.00 | 0 | 0.00 | 0.00 | 0.00 | 0 | 0.00 | 0.04 | 0.04 | 1 |
| Q8N3U4 | Cohesin subunit SA-2 | STAG2 | 1.71 | 1 | 141.2 | 5.43 | 0.00 | 0.00 | 0.00 | 0 | 0.00 | 0.17 | 0.17 | 1 | 0.00 | 0.00 | 0.00 | 0 | 0.00 | 0.00 | 0.00 | 0 | 0.00 | 0.04 | 0.04 | 1 |
| P04180 | Phosphatidylcholine-sterol acyltransferase | LCAT | 4.55 | 1 | 49.5 | 6.11 | 0.00 | 0.00 | 0.00 | 0 | 0.00 | 0.00 | 0.00 | 0 | 0.00 | 0.17 | 0.17 | 1 | 0.00 | 0.00 | 0.00 | 0 | 0.00 | 0.04 | 0.04 | 1 |
| O60636 | Tetraspanin-2 | TSPAN2 | 14.48 | 1 | 24.1 | 7.77 | 0.00 | 0.17 | 0.17 | 1 | 0.00 | 0.00 | 0.00 | 0 | 0.00 | 0.00 | 0.00 | 0 | 0.00 | 0.00 | 0.00 | 0 | 0.00 | 0.04 | 0.04 | 1 |
| E9PI23 | Transmembrane protein 218 | TMEM218 | 21.99 | 1 | 15.6 | 9.44 | 0.00 | 0.00 | 0.00 | 0 | 0.00 | 0.00 | 0.00 | 0 | 0.00 | 0.00 | 0.00 | 0 | 0.37 | 0.17 | 0.17 | 1 | 0.09 | 0.04 | 0.04 | 1 |
| Q9HCD6 | Protein TANC2 | TANC2 | 0.70 | 1 | 219.5 | 8.07 | 0.00 | 0.00 | 0.00 | 0 | 0.00 | 0.00 | 0.00 | 0 | 0.29 | 0.17 | 0.17 | 1 | 0.00 | 0.00 | 0.00 | 0 | 0.07 | 0.04 | 0.04 | 1 |
| B1AJW4 | 1-phosphatidylinositol 4,5-bisphosphate phosphodiesterase beta-4 (Fragment) | PLCB4 | 15.04 | 1 | 12.8 | 4.55 | 0.00 | 0.17 | 0.17 | 1 | 0.00 | 0.00 | 0.00 | 0 | 0.00 | 0.00 | 0.00 | 0 | 0.00 | 0.00 | 0.00 | 0 | 0.00 | 0.04 | 0.04 | 1 |
| Q9UJS0 | Calcium-binding mitochondrial carrier protein Aralar2 | SLC25A13 | 5.48 | 1 | 74.1 | 8.62 | 0.00 | 0.00 | 0.00 | 0 | 0.00 | 0.00 | 0.00 | 0 | 0.00 | 0.00 | 0.00 | 0 | 0.00 | 0.17 | 0.17 | 1 | 0.00 | 0.04 | 0.04 | 1 |
| Q8WW38 | Zinc finger protein ZFPM2 | ZFPM2 | 2.00 | 1 | 128.1 | 6.47 | 0.00 | 0.00 | 0.00 | 0 | 0.00 | 0.17 | 0.17 | 1 | 0.00 | 0.00 | 0.00 | 0 | 0.00 | 0.00 | 0.00 | 0 | 0.00 | 0.04 | 0.04 | 1 |
| Q8N2C7 | Protein unc-80 homolog | UNC80 | 0.77 | 1 | 363.2 | 6.86 | 0.00 | 0.17 | 0.17 | 1 | 0.00 | 0.00 | 0.00 | 0 | 0.00 | 0.00 | 0.00 | 0 | 0.00 | 0.00 | 0.00 | 0 | 0.00 | 0.04 | 0.04 | 1 |
| Q07954 | Prolow-density lipoprotein receptor-related protein 1 | LRP1 | 0.51 | 1 | 504.3 | 5.39 | 0.00 | 0.00 | 0.00 | 0 | 0.00 | 0.00 | 0.00 | 0 | 0.00 | 0.00 | 0.00 | 0 | 0.00 | 0.17 | 0.17 | 1 | 0.00 | 0.04 | 0.04 | 1 |
| P19838 | Nuclear factor NF-kappa-B p105 subunit | NFKB1 | 1.86 | 1 | 105.3 | 5.40 | 0.00 | 0.00 | 0.00 | 0 | 0.00 | 0.00 | 0.00 | 0 | 0.00 | 0.17 | 0.17 | 1 | 0.00 | 0.00 | 0.00 | 0 | 0.00 | 0.04 | 0.04 | 1 |
| Q9Y5B6 | PAX3- and PAX7-binding protein 1 | PAXBP1 | 1.85 | 1 | 104.7 | 5.68 | 0.00 | 0.17 | 0.17 | 1 | 0.00 | 0.00 | 0.00 | 0 | 0.00 | 0.00 | 0.00 | 0 | 0.00 | 0.00 | 0.00 | 0 | 0.00 | 0.04 | 0.04 | 1 |
| Q8WXH0 | Nesprin-2 | SYNE2 | 0.32 | 1 | 795.9 | 5.36 | 0.00 | 0.00 | 0.00 | 0 | 0.00 | 0.00 | 0.00 | 0 | 0.00 | 0.00 | 0.00 | 0 | 0.00 | 0.17 | 0.17 | 1 | 0.00 | 0.04 | 0.04 | 1 |
| Q9Y3Q3 | Transmembrane emp24 domain-containing protein 3 | TMED3 | 13.36 | 1 | 24.8 | 5.60 | 0.00 | 0.17 | 0.17 | 1 | 0.00 | 0.00 | 0.00 | 0 | 0.00 | 0.00 | 0.00 | 0 | 0.00 | 0.00 | 0.00 | 0 | 0.00 | 0.04 | 0.04 | 1 |
| Q7Z3Y9 | Keratin, type I cytoskeletal 26 | KRT26 | 5.77 | 1 | 51.9 | 4.92 | 0.00 | 0.00 | 0.00 | 0 | 0.00 | 0.00 | 0.00 | 0 | 0.00 | 0.00 | 0.00 | 0 | 0.00 | 0.17 | 0.17 | 1 | 0.00 | 0.04 | 0.04 | 1 |
| Q5VUA4 | Zinc finger protein 318 | ZNF318 | 1.05 | 1 | 251.0 | 7.20 | 0.00 | 0.00 | 0.00 | 0 | 0.00 | 0.00 | 0.00 | 0 | 0.00 | 0.00 | 0.00 | 0 | 0.00 | 0.17 | 0.17 | 1 | 0.00 | 0.04 | 0.04 | 1 |
| Q5T4D3 | Protein O-mannosyl-transferase TMTC4 | TMTC4 | 3.37 | 1 | 82.9 | 8.94 | 0.34 | 0.17 | 0.17 | 1 | 0.00 | 0.00 | 0.00 | 0 | 0.00 | 0.00 | 0.00 | 0 | 0.00 | 0.00 | 0.00 | 0 | 0.09 | 0.04 | 0.04 | 1 |
| A0A2R8YFL7 | Oocyte-secreted protein 4A | OOSP4A | 10.33 | 1 | 21.0 | 7.97 | 0.00 | 0.00 | 0.00 | 0 | 0.00 | 0.00 | 0.00 | 0 | 0.00 | 0.00 | 0.00 | 0 | 0.00 | 0.17 | 0.17 | 1 | 0.00 | 0.04 | 0.04 | 1 |
| Q8N0X4 | Citramalyl-CoA lyase, mitochondrial | CLYBL | 6.47 | 1 | 37.3 | 8.73 | 0.00 | 0.17 | 0.17 | 1 | 0.00 | 0.00 | 0.00 | 0 | 0.00 | 0.00 | 0.00 | 0 | 0.00 | 0.00 | 0.00 | 0 | 0.00 | 0.04 | 0.04 | 1 |
| P56704 | Protein Wnt-3a | WNT3A | 5.97 | 1 | 39.3 | 8.12 | 0.00 | 0.00 | 0.00 | 0 | 0.00 | 0.00 | 0.00 | 0 | 0.00 | 0.00 | 0.00 | 0 | 0.28 | 0.17 | 0.17 | 1 | 0.07 | 0.04 | 0.04 | 1 |
| Q8N9P6 | Uncharacterized protein C9orf163 | C9orf163 | 13.30 | 1 | 22.1 | 11.66 | 0.00 | 0.00 | 0.00 | 0 | 0.00 | 0.17 | 0.17 | 1 | 0.00 | 0.00 | 0.00 | 0 | 0.00 | 0.00 | 0.00 | 0 | 0.00 | 0.04 | 0.04 | 1 |
| Q96CG8 | Collagen triple helix repeat-containing protein 1 | CTHRC1 | 12.35 | 1 | 26.2 | 7.99 | 0.00 | 0.00 | 0.00 | 0 | 0.00 | 0.00 | 0.00 | 0 | 0.00 | 0.00 | 0.00 | 0 | 0.00 | 0.17 | 0.17 | 1 | 0.00 | 0.04 | 0.04 | 1 |
| P31629 | Transcription factor HIVEP2 | HIVEP2 | 0.78 | 1 | 268.9 | 6.96 | 0.00 | 0.00 | 0.00 | 0 | 0.00 | 0.00 | 0.00 | 0 | 0.30 | 0.17 | 0.17 | 1 | 0.00 | 0.00 | 0.00 | 0 | 0.08 | 0.04 | 0.04 | 1 |
| O75746 | Calcium-binding mitochondrial carrier protein Aralar1 | SLC25A12 | 3.24 | 1 | 74.7 | 8.38 | 0.00 | 0.00 | 0.00 | 0 | 0.31 | 0.17 | 0.17 | 1 | 0.00 | 0.00 | 0.00 | 0 | 0.00 | 0.00 | 0.00 | 0 | 0.08 | 0.04 | 0.04 | 1 |
| O75947 | ATP synthase subunit d, mitochondrial | ATP5PD | 7.45 | 1 | 18.5 | 5.30 | 0.00 | 0.00 | 0.00 | 0 | 0.00 | 0.17 | 0.17 | 1 | 0.00 | 0.00 | 0.00 | 0 | 0.00 | 0.00 | 0.00 | 0 | 0.00 | 0.04 | 0.04 | 1 |
| Q93098 | Protein Wnt-8b | WNT8B | 3.13 | 1 | 38.7 | 8.54 | 0.29 | 0.17 | 0.17 | 1 | 0.00 | 0.00 | 0.00 | 0 | 0.00 | 0.00 | 0.00 | 0 | 0.00 | 0.00 | 0.00 | 0 | 0.07 | 0.04 | 0.04 | 1 |
| Q8N129 | Protein canopy homolog 4 | CNPY4 | 4.84 | 1 | 28.3 | 4.64 | 0.00 | 0.17 | 0.17 | 1 | 0.00 | 0.00 | 0.00 | 0 | 0.00 | 0.00 | 0.00 | 0 | 0.00 | 0.00 | 0.00 | 0 | 0.00 | 0.04 | 0.04 | 1 |
| O60664 | Perilipin-3 | PLIN3 | 6.91 | 1 | 47.0 | 5.44 | 0.00 | 0.00 | 0.00 | 0 | 0.00 | 0.00 | 0.00 | 0 | 0.00 | 0.17 | 0.17 | 1 | 0.00 | 0.00 | 0.00 | 0 | 0.00 | 0.04 | 0.04 | 1 |
| Q13936 | Voltage-dependent L-type calcium channel subunit alpha-1C | CACNA1C | 1.22 | 1 | 248.8 | 6.76 | 0.00 | 0.00 | 0.00 | 0 | 0.00 | 0.00 | 0.00 | 0 | 0.34 | 0.17 | 0.17 | 1 | 0.00 | 0.00 | 0.00 | 0 | 0.09 | 0.04 | 0.04 | 1 |
| Q8N2K0 | Monoacylglycerol lipase ABHD12 | ABHD12 | 4.77 | 1 | 45.1 | 8.65 | 0.00 | 0.00 | 0.00 | 0 | 0.00 | 0.17 | 0.17 | 1 | 0.00 | 0.00 | 0.00 | 0 | 0.00 | 0.00 | 0.00 | 0 | 0.00 | 0.04 | 0.04 | 1 |
| Q9HAV4 | Exportin-5 | XPO5 | 1.74 | 1 | 136.2 | 5.80 | 0.00 | 0.00 | 0.00 | 0 | 0.00 | 0.17 | 0.17 | 1 | 0.00 | 0.00 | 0.00 | 0 | 0.00 | 0.00 | 0.00 | 0 | 0.00 | 0.04 | 0.04 | 1 |
| A0A2R8YGD3 | Rap guanine nucleotide exchange factor 2 | RAPGEF2 | 0.95 | 1 | 188.2 | 6.68 | 0.00 | 0.00 | 0.00 | 0 | 0.00 | 0.00 | 0.00 | 0 | 0.00 | 0.17 | 0.17 | 1 | 0.00 | 0.00 | 0.00 | 0 | 0.00 | 0.04 | 0.04 | 1 |
| Q8N4F0 | BPI fold-containing family B member 2 | BPIFB2 | 6.33 | 1 | 49.1 | 8.72 | 0.00 | 0.17 | 0.17 | 1 | 0.00 | 0.00 | 0.00 | 0 | 0.00 | 0.00 | 0.00 | 0 | 0.00 | 0.00 | 0.00 | 0 | 0.00 | 0.04 | 0.04 | 1 |
| Q9HC29 | Nucleotide-binding oligomerization domain-containing protein 2 | NOD2 | 2.50 | 1 | 115.2 | 6.76 | 0.00 | 0.00 | 0.00 | 0 | 0.00 | 0.00 | 0.00 | 0 | 0.00 | 0.00 | 0.00 | 0 | 0.34 | 0.17 | 0.17 | 1 | 0.09 | 0.04 | 0.04 | 1 |
| P48634 | Protein PRRC2A | PRRC2A | 1.39 | 1 | 228.7 | 9.45 | 0.00 | 0.00 | 0.00 | 0 | 0.00 | 0.00 | 0.00 | 0 | 0.00 | 0.17 | 0.17 | 1 | 0.00 | 0.00 | 0.00 | 0 | 0.00 | 0.04 | 0.04 | 1 |
| O95782 | AP-2 complex subunit alpha-1 | AP2A1 | 2.87 | 1 | 107.5 | 7.03 | 0.00 | 0.00 | 0.00 | 0 | 0.48 | 0.17 | 0.17 | 1 | 0.00 | 0.00 | 0.00 | 0 | 0.00 | 0.00 | 0.00 | 0 | 0.12 | 0.04 | 0.04 | 1 |
| Q86Z20 | Coiled-coil domain-containing protein 125 | CCDC125 | 2.35 | 1 | 58.6 | 7.24 | 0.00 | 0.00 | 0.00 | 0 | 0.00 | 0.00 | 0.00 | 0 | 0.00 | 0.00 | 0.00 | 0 | 0.00 | 0.17 | 0.17 | 1 | 0.00 | 0.04 | 0.04 | 1 |
| Q9UQR0 | Sex comb on midleg-like protein 2 | SCML2 | 2.29 | 1 | 77.2 | 8.54 | 0.00 | 0.00 | 0.00 | 0 | 0.00 | 0.00 | 0.00 | 0 | 0.28 | 0.17 | 0.17 | 1 | 0.00 | 0.00 | 0.00 | 0 | 0.07 | 0.04 | 0.04 | 1 |
| O60303 | Protein KIAA0556 | KIAA0556 | 1.61 | 1 | 180.8 | 5.87 | 0.00 | 0.00 | 0.00 | 0 | 0.39 | 0.17 | 0.17 | 1 | 0.00 | 0.00 | 0.00 | 0 | 0.00 | 0.00 | 0.00 | 0 | 0.10 | 0.04 | 0.04 | 1 |
| P09874 | Poly [ADP-ribose] polymerase 1 | PARP1 | 1.28 | 1 | 113.0 | 8.88 | 0.00 | 0.00 | 0.00 | 0 | 0.00 | 0.17 | 0.17 | 1 | 0.00 | 0.00 | 0.00 | 0 | 0.00 | 0.00 | 0.00 | 0 | 0.00 | 0.04 | 0.04 | 1 |
| F8WEM9 | Uncharacterized protein |  | 14.29 | 1 | 13.6 | 4.63 | 0.00 | 0.00 | 0.00 | 0 | 0.00 | 0.17 | 0.17 | 1 | 0.00 | 0.00 | 0.00 | 0 | 0.00 | 0.00 | 0.00 | 0 | 0.00 | 0.04 | 0.04 | 1 |
| Q96RW7 | Hemicentin-1 | HMCN1 | 0.30 | 1 | 613.0 | 6.49 | 0.00 | 0.17 | 0.17 | 1 | 0.00 | 0.00 | 0.00 | 0 | 0.00 | 0.00 | 0.00 | 0 | 0.00 | 0.00 | 0.00 | 0 | 0.00 | 0.04 | 0.04 | 1 |
| P03915 | NADH-ubiquinone oxidoreductase chain 5 | MT-ND5 | 4.64 | 1 | 67.0 | 9.03 | 0.00 | 0.17 | 0.17 | 1 | 0.00 | 0.00 | 0.00 | 0 | 0.00 | 0.00 | 0.00 | 0 | 0.00 | 0.00 | 0.00 | 0 | 0.00 | 0.04 | 0.04 | 1 |
| Q709F0 | Acyl-CoA dehydrogenase family member 11 | ACAD11 | 4.49 | 1 | 87.2 | 8.02 | 0.00 | 0.00 | 0.00 | 0 | 0.00 | 0.00 | 0.00 | 0 | 0.00 | 0.00 | 0.00 | 0 | 0.00 | 0.17 | 0.17 | 1 | 0.00 | 0.04 | 0.04 | 1 |
| O15047 | Histone-lysine N-methyltransferase SETD1A | SETD1A | 1.58 | 1 | 185.9 | 5.14 | 0.35 | 0.17 | 0.17 | 1 | 0.00 | 0.00 | 0.00 | 0 | 0.00 | 0.00 | 0.00 | 0 | 0.00 | 0.00 | 0.00 | 0 | 0.09 | 0.04 | 0.04 | 1 |
| Q8NGZ4 | Olfactory receptor 2G3 | OR2G3 | 7.12 | 1 | 34.5 | 7.87 | 0.00 | 0.00 | 0.00 | 0 | 0.00 | 0.17 | 0.17 | 1 | 0.00 | 0.00 | 0.00 | 0 | 0.00 | 0.00 | 0.00 | 0 | 0.00 | 0.04 | 0.04 | 1 |
| P40238 | Thrombopoietin receptor | MPL | 2.83 | 1 | 71.2 | 6.48 | 0.00 | 0.00 | 0.00 | 0 | 0.00 | 0.00 | 0.00 | 0 | 0.00 | 0.00 | 0.00 | 0 | 0.00 | 0.17 | 0.17 | 1 | 0.00 | 0.04 | 0.04 | 1 |
| Q96JC1 | Vam6/Vps39-like protein | VPS39 | 3.27 | 1 | 101.7 | 6.99 | 0.00 | 0.00 | 0.00 | 0 | 0.00 | 0.00 | 0.00 | 0 | 0.37 | 0.17 | 0.17 | 1 | 0.00 | 0.00 | 0.00 | 0 | 0.09 | 0.04 | 0.04 | 1 |
| J3QLP4 | Serine/threonine-protein kinase RIO3 (Fragment) | RIOK3 | 32.58 | 1 | 9.6 | 4.67 | 0.00 | 0.00 | 0.00 | 0 | 0.00 | 0.17 | 0.17 | 1 | 0.00 | 0.00 | 0.00 | 0 | 0.00 | 0.00 | 0.00 | 0 | 0.00 | 0.04 | 0.04 | 1 |
| Q8N697 | Solute carrier family 15 member 4 | SLC15A4 | 3.64 | 1 | 62.0 | 9.00 | 0.00 | 0.00 | 0.00 | 0 | 0.00 | 0.17 | 0.17 | 1 | 0.00 | 0.00 | 0.00 | 0 | 0.00 | 0.00 | 0.00 | 0 | 0.00 | 0.04 | 0.04 | 1 |
| P63172 | Dynein light chain Tctex-type 1 | DYNLT1 | 15.93 | 1 | 12.4 | 5.08 | 0.00 | 0.00 | 0.00 | 0 | 0.32 | 0.17 | 0.17 | 1 | 0.00 | 0.00 | 0.00 | 0 | 0.00 | 0.00 | 0.00 | 0 | 0.08 | 0.04 | 0.04 | 1 |
| Q9NZI5 | Grainyhead-like protein 1 homolog | GRHL1 | 2.43 | 1 | 70.1 | 6.73 | 0.00 | 0.00 | 0.00 | 0 | 0.00 | 0.00 | 0.00 | 0 | 0.00 | 0.17 | 0.17 | 1 | 0.00 | 0.00 | 0.00 | 0 | 0.00 | 0.04 | 0.04 | 1 |
| Q92935 | Exostosin-like 1 | EXTL1 | 2.51 | 1 | 74.6 | 8.19 | 0.00 | 0.00 | 0.00 | 0 | 0.00 | 0.00 | 0.00 | 0 | 0.00 | 0.17 | 0.17 | 1 | 0.00 | 0.00 | 0.00 | 0 | 0.00 | 0.04 | 0.04 | 1 |
| I3L273 | Golgi-associated olfactory sialing regulator | GFY | 4.44 | 1 | 56.1 | 5.99 | 0.00 | 0.00 | 0.00 | 0 | 0.00 | 0.00 | 0.00 | 0 | 0.00 | 0.00 | 0.00 | 0 | 0.00 | 0.17 | 0.17 | 1 | 0.00 | 0.04 | 0.04 | 1 |
| Q92882 | Osteoclast-stimulating factor 1 | OSTF1 | 5.61 | 1 | 23.8 | 5.68 | 0.00 | 0.00 | 0.00 | 0 | 0.00 | 0.00 | 0.00 | 0 | 0.00 | 0.17 | 0.17 | 1 | 0.00 | 0.00 | 0.00 | 0 | 0.00 | 0.04 | 0.04 | 1 |
| Q96A33 | Coiled-coil domain-containing protein 47 | CCDC47 | 2.07 | 1 | 55.8 | 4.87 | 0.00 | 0.00 | 0.00 | 0 | 0.00 | 0.00 | 0.00 | 0 | 0.00 | 0.00 | 0.00 | 0 | 0.00 | 0.17 | 0.17 | 1 | 0.00 | 0.04 | 0.04 | 1 |
| P0CG20 | Proline-rich protein 35 | PRR35 | 2.80 | 1 | 59.3 | 8.92 | 0.00 | 0.00 | 0.00 | 0 | 0.00 | 0.00 | 0.00 | 0 | 0.00 | 0.00 | 0.00 | 0 | 0.00 | 0.17 | 0.17 | 1 | 0.00 | 0.04 | 0.04 | 1 |
| B1AKZ5 | Astrocytic phosphoprotein PEA-15 | PEA15 | 12.96 | 1 | 12.5 | 5.17 | 0.00 | 0.00 | 0.00 | 0 | 0.32 | 0.17 | 0.17 | 1 | 0.00 | 0.00 | 0.00 | 0 | 0.00 | 0.00 | 0.00 | 0 | 0.08 | 0.04 | 0.04 | 1 |
| P63128 | Endogenous retrovirus group K member 9 Pol protein | ERVK-9 | 1.61 | 1 | 123.5 | 8.87 | 0.00 | 0.00 | 0.00 | 0 | 0.00 | 0.17 | 0.17 | 1 | 0.00 | 0.00 | 0.00 | 0 | 0.00 | 0.00 | 0.00 | 0 | 0.00 | 0.04 | 0.04 | 1 |
| A0A3B3IRF8 | Calsyntenin-3 | CLSTN3 | 4.12 | 1 | 39.6 | 8.62 | 0.00 | 0.00 | 0.00 | 0 | 0.27 | 0.17 | 0.17 | 1 | 0.00 | 0.00 | 0.00 | 0 | 0.00 | 0.00 | 0.00 | 0 | 0.07 | 0.04 | 0.04 | 1 |
| Q702N8 | Xin actin-binding repeat-containing protein 1 | XIRP1 | 0.81 | 1 | 198.4 | 6.15 | 0.00 | 0.17 | 0.17 | 1 | 0.00 | 0.00 | 0.00 | 0 | 0.00 | 0.00 | 0.00 | 0 | 0.00 | 0.00 | 0.00 | 0 | 0.00 | 0.04 | 0.04 | 1 |
| Q9UJU2 | Lymphoid enhancer-binding factor 1 | LEF1 | 7.02 | 1 | 44.2 | 7.42 | 0.00 | 0.00 | 0.00 | 0 | 0.00 | 0.17 | 0.17 | 1 | 0.00 | 0.00 | 0.00 | 0 | 0.00 | 0.00 | 0.00 | 0 | 0.00 | 0.04 | 0.04 | 1 |
| Q5IJ48 | Protein crumbs homolog 2 | CRB2 | 2.10 | 1 | 134.2 | 5.55 | 0.00 | 0.00 | 0.00 | 0 | 0.00 | 0.00 | 0.00 | 0 | 0.00 | 0.00 | 0.00 | 0 | 0.00 | 0.17 | 0.17 | 1 | 0.00 | 0.04 | 0.04 | 1 |
| Q00537 | Cyclin-dependent kinase 17 | CDK17 | 5.16 | 1 | 59.5 | 9.03 | 0.40 | 0.17 | 0.17 | 1 | 0.00 | 0.00 | 0.00 | 0 | 0.00 | 0.00 | 0.00 | 0 | 0.00 | 0.00 | 0.00 | 0 | 0.10 | 0.04 | 0.04 | 1 |
| O75051 | Plexin-A2 | PLXNA2 | 1.43 | 1 | 211.0 | 6.48 | 0.00 | 0.00 | 0.00 | 0 | 0.00 | 0.00 | 0.00 | 0 | 0.00 | 0.17 | 0.17 | 1 | 0.00 | 0.00 | 0.00 | 0 | 0.00 | 0.04 | 0.04 | 1 |
| Q86XP0 | Cytosolic phospholipase A2 delta | PLA2G4D | 2.20 | 1 | 91.9 | 5.50 | 0.00 | 0.00 | 0.00 | 0 | 0.00 | 0.00 | 0.00 | 0 | 0.00 | 0.00 | 0.00 | 0 | 0.00 | 0.17 | 0.17 | 1 | 0.00 | 0.04 | 0.04 | 1 |
| A0A0A0MTH9 | TATA-binding protein-associated factor 172 | BTAF1 | 1.19 | 1 | 206.8 | 6.52 | 0.00 | 0.17 | 0.17 | 1 | 0.00 | 0.00 | 0.00 | 0 | 0.00 | 0.00 | 0.00 | 0 | 0.00 | 0.00 | 0.00 | 0 | 0.00 | 0.04 | 0.04 | 1 |
| A0A087WW66 | 26S proteasome non-ATPase regulatory subunit 1 | PSMD1 | 2.52 | 1 | 105.8 | 5.41 | 0.00 | 0.00 | 0.00 | 0 | 0.38 | 0.17 | 0.17 | 1 | 0.00 | 0.00 | 0.00 | 0 | 0.00 | 0.00 | 0.00 | 0 | 0.10 | 0.04 | 0.04 | 1 |
| P49753 | Acyl-coenzyme A thioesterase 2, mitochondrial | ACOT2 | 5.80 | 1 | 53.2 | 8.47 | 0.00 | 0.17 | 0.17 | 1 | 0.00 | 0.00 | 0.00 | 0 | 0.00 | 0.00 | 0.00 | 0 | 0.00 | 0.00 | 0.00 | 0 | 0.00 | 0.04 | 0.04 | 1 |
| Q99835 | Smoothened homolog | SMO | 2.92 | 1 | 86.3 | 8.34 | 0.00 | 0.17 | 0.17 | 1 | 0.00 | 0.00 | 0.00 | 0 | 0.00 | 0.00 | 0.00 | 0 | 0.00 | 0.00 | 0.00 | 0 | 0.00 | 0.04 | 0.04 | 1 |
| P61457 | Pterin-4-alpha-carbinolamine dehydratase | PCBD1 | 15.38 | 1 | 12.0 | 6.80 | 0.00 | 0.00 | 0.00 | 0 | 0.29 | 0.17 | 0.17 | 1 | 0.00 | 0.00 | 0.00 | 0 | 0.00 | 0.00 | 0.00 | 0 | 0.07 | 0.04 | 0.04 | 1 |
| P46060 | Ran GTPase-activating protein 1 | RANGAP1 | 3.92 | 1 | 63.5 | 4.68 | 0.00 | 0.17 | 0.17 | 1 | 0.00 | 0.00 | 0.00 | 0 | 0.00 | 0.00 | 0.00 | 0 | 0.00 | 0.00 | 0.00 | 0 | 0.00 | 0.04 | 0.04 | 1 |
| Q86VS3 | IQ domain-containing protein H | IQCH | 2.43 | 1 | 117.3 | 9.10 | 0.00 | 0.00 | 0.00 | 0 | 0.00 | 0.17 | 0.17 | 1 | 0.00 | 0.00 | 0.00 | 0 | 0.00 | 0.00 | 0.00 | 0 | 0.00 | 0.04 | 0.04 | 1 |
| Q8N1D0 | Beckwith-Wiedemann syndrome chromosomal region 1 candidate gene B protein | SLC22A18AS | 9.09 | 1 | 27.0 | 9.79 | 0.00 | 0.00 | 0.00 | 0 | 0.00 | 0.00 | 0.00 | 0 | 0.00 | 0.17 | 0.17 | 1 | 0.00 | 0.00 | 0.00 | 0 | 0.00 | 0.04 | 0.04 | 1 |
| P20908 | Collagen alpha-1(V) chain | COL5A1 | 1.09 | 1 | 183.4 | 5.06 | 0.00 | 0.00 | 0.00 | 0 | 0.00 | 0.17 | 0.17 | 1 | 0.00 | 0.00 | 0.00 | 0 | 0.00 | 0.00 | 0.00 | 0 | 0.00 | 0.04 | 0.04 | 1 |
| Q13042 | Cell division cycle protein 16 homolog | CDC16 | 4.68 | 1 | 71.6 | 5.85 | 0.00 | 0.00 | 0.00 | 0 | 0.00 | 0.17 | 0.17 | 1 | 0.00 | 0.00 | 0.00 | 0 | 0.00 | 0.00 | 0.00 | 0 | 0.00 | 0.04 | 0.04 | 1 |
| O75900 | Matrix metalloproteinase-23 | MMP23B | 5.13 | 1 | 43.9 | 9.89 | 0.00 | 0.17 | 0.17 | 1 | 0.00 | 0.00 | 0.00 | 0 | 0.00 | 0.00 | 0.00 | 0 | 0.00 | 0.00 | 0.00 | 0 | 0.00 | 0.04 | 0.04 | 1 |
| Q643R3 | Lysophospholipid acyltransferase LPCAT4 | LPCAT4 | 4.96 | 1 | 57.2 | 8.97 | 0.00 | 0.00 | 0.00 | 0 | 0.00 | 0.00 | 0.00 | 0 | 0.00 | 0.00 | 0.00 | 0 | 0.37 | 0.17 | 0.17 | 1 | 0.09 | 0.04 | 0.04 | 1 |
| P41231 | P2Y purinoceptor 2 | P2RY2 | 5.57 | 1 | 42.2 | 9.64 | 0.00 | 0.17 | 0.17 | 1 | 0.00 | 0.00 | 0.00 | 0 | 0.00 | 0.00 | 0.00 | 0 | 0.00 | 0.00 | 0.00 | 0 | 0.00 | 0.04 | 0.04 | 1 |
| K7EM05 | Acyl-CoA binding domain containing 4 isoform 4 | ACBD4 | 8.92 | 1 | 29.7 | 5.17 | 0.00 | 0.00 | 0.00 | 0 | 0.00 | 0.00 | 0.00 | 0 | 0.00 | 0.17 | 0.17 | 1 | 0.00 | 0.00 | 0.00 | 0 | 0.00 | 0.04 | 0.04 | 1 |
| Q14644 | Ras GTPase-activating protein 3 | RASA3 | 2.40 | 1 | 95.6 | 7.15 | 0.00 | 0.00 | 0.00 | 0 | 0.00 | 0.00 | 0.00 | 0 | 0.00 | 0.17 | 0.17 | 1 | 0.00 | 0.00 | 0.00 | 0 | 0.00 | 0.04 | 0.04 | 1 |
| Q9Y316 | Protein MEMO1 | MEMO1 | 6.40 | 1 | 33.7 | 7.14 | 0.00 | 0.00 | 0.00 | 0 | 0.00 | 0.00 | 0.00 | 0 | 0.00 | 0.17 | 0.17 | 1 | 0.00 | 0.00 | 0.00 | 0 | 0.00 | 0.04 | 0.04 | 1 |
| P31040 | Succinate dehydrogenase [ubiquinone] flavoprotein subunit, mitochondrial | SDHA | 2.11 | 1 | 72.6 | 7.39 | 0.00 | 0.00 | 0.00 | 0 | 0.29 | 0.17 | 0.17 | 1 | 0.00 | 0.00 | 0.00 | 0 | 0.00 | 0.00 | 0.00 | 0 | 0.07 | 0.04 | 0.04 | 1 |
| Q9Y2J4 | Angiomotin-like protein 2 | AMOTL2 | 2.44 | 1 | 85.7 | 7.30 | 0.00 | 0.00 | 0.00 | 0 | 0.00 | 0.17 | 0.17 | 1 | 0.00 | 0.00 | 0.00 | 0 | 0.00 | 0.00 | 0.00 | 0 | 0.00 | 0.04 | 0.04 | 1 |
| O75489 | NADH dehydrogenase [ubiquinone] iron-sulfur protein 3, mitochondrial | NDUFS3 | 11.36 | 1 | 30.2 | 7.50 | 0.00 | 0.00 | 0.00 | 0 | 0.00 | 0.00 | 0.00 | 0 | 0.00 | 0.00 | 0.00 | 0 | 0.00 | 0.17 | 0.17 | 1 | 0.00 | 0.04 | 0.04 | 1 |
| Q9H3M7 | Thioredoxin-interacting protein | TXNIP | 6.39 | 1 | 43.6 | 7.50 | 0.00 | 0.17 | 0.17 | 1 | 0.00 | 0.00 | 0.00 | 0 | 0.00 | 0.00 | 0.00 | 0 | 0.00 | 0.00 | 0.00 | 0 | 0.00 | 0.04 | 0.04 | 1 |
| Q13596 | Sorting nexin-1 | SNX1 | 4.79 | 1 | 59.0 | 5.15 | 0.35 | 0.17 | 0.17 | 1 | 0.00 | 0.00 | 0.00 | 0 | 0.00 | 0.00 | 0.00 | 0 | 0.00 | 0.00 | 0.00 | 0 | 0.09 | 0.04 | 0.04 | 1 |
| C9JB85 | PEX5-related protein (Fragment) | PEX5L | 12.89 | 1 | 21.4 | 5.50 | 0.00 | 0.00 | 0.00 | 0 | 0.00 | 0.17 | 0.17 | 1 | 0.00 | 0.00 | 0.00 | 0 | 0.00 | 0.00 | 0.00 | 0 | 0.00 | 0.04 | 0.04 | 1 |
| Q15052 | Rho guanine nucleotide exchange factor 6 | ARHGEF6 | 2.58 | 1 | 87.4 | 6.05 | 0.00 | 0.00 | 0.00 | 0 | 0.00 | 0.00 | 0.00 | 0 | 0.00 | 0.17 | 0.17 | 1 | 0.00 | 0.00 | 0.00 | 0 | 0.00 | 0.04 | 0.04 | 1 |
| Q9Y365 | START domain-containing protein 10 | STARD10 | 4.47 | 1 | 33.0 | 7.12 | 0.00 | 0.00 | 0.00 | 0 | 0.00 | 0.00 | 0.00 | 0 | 0.29 | 0.17 | 0.17 | 1 | 0.00 | 0.00 | 0.00 | 0 | 0.07 | 0.04 | 0.04 | 1 |
| O43663 | Protein regulator of cytokinesis 1 | PRC1 | 4.03 | 1 | 71.6 | 6.68 | 0.00 | 0.00 | 0.00 | 0 | 0.00 | 0.00 | 0.00 | 0 | 0.00 | 0.17 | 0.17 | 1 | 0.00 | 0.00 | 0.00 | 0 | 0.00 | 0.04 | 0.04 | 1 |
| P07910 | Heterogeneous nuclear ribonucleoproteins C1/C2 | HNRNPC | 5.23 | 1 | 33.7 | 5.08 | 0.00 | 0.00 | 0.00 | 0 | 0.00 | 0.00 | 0.00 | 0 | 0.00 | 0.00 | 0.00 | 0 | 0.34 | 0.17 | 0.17 | 1 | 0.08 | 0.04 | 0.04 | 1 |
| C9IZQ1 | Translocon-associated protein subunit alpha | SSR1 | 2.68 | 1 | 33.9 | 4.69 | 0.00 | 0.17 | 0.17 | 1 | 0.00 | 0.00 | 0.00 | 0 | 0.00 | 0.00 | 0.00 | 0 | 0.00 | 0.00 | 0.00 | 0 | 0.00 | 0.04 | 0.04 | 1 |
| P22695 | Cytochrome b-c1 complex subunit 2, mitochondrial | UQCRC2 | 3.97 | 1 | 48.4 | 8.63 | 0.00 | 0.00 | 0.00 | 0 | 0.00 | 0.00 | 0.00 | 0 | 0.00 | 0.00 | 0.00 | 0 | 0.00 | 0.17 | 0.17 | 1 | 0.00 | 0.04 | 0.04 | 1 |
| Q5TCC9 | Isoleucine--tRNA ligase, cytoplasmic (Fragment) | IARS | 29.17 | 1 | 8.8 | 7.28 | 0.00 | 0.17 | 0.17 | 1 | 0.00 | 0.00 | 0.00 | 0 | 0.00 | 0.00 | 0.00 | 0 | 0.00 | 0.00 | 0.00 | 0 | 0.00 | 0.04 | 0.04 | 1 |
| Q9UFE4 | Coiled-coil domain-containing protein 39 | CCDC39 | 1.49 | 1 | 109.8 | 6.44 | 0.00 | 0.00 | 0.00 | 0 | 0.00 | 0.00 | 0.00 | 0 | 0.00 | 0.00 | 0.00 | 0 | 0.30 | 0.17 | 0.17 | 1 | 0.07 | 0.04 | 0.04 | 1 |
| Q13099 | Intraflagellar transport protein 88 homolog | IFT88 | 1.32 | 1 | 94.2 | 6.54 | 0.00 | 0.00 | 0.00 | 0 | 0.00 | 0.00 | 0.00 | 0 | 0.00 | 0.00 | 0.00 | 0 | 0.00 | 0.17 | 0.17 | 1 | 0.00 | 0.04 | 0.04 | 1 |
| O60403 | Olfactory receptor 10H2 | OR10H2 | 9.52 | 1 | 34.6 | 8.35 | 0.00 | 0.17 | 0.17 | 1 | 0.00 | 0.00 | 0.00 | 0 | 0.00 | 0.00 | 0.00 | 0 | 0.00 | 0.00 | 0.00 | 0 | 0.00 | 0.04 | 0.04 | 1 |
| A6ND91 | Putative L-aspartate dehydrogenase | ASPDH | 2.83 | 1 | 29.9 | 7.28 | 0.00 | 0.00 | 0.00 | 0 | 0.00 | 0.00 | 0.00 | 0 | 0.00 | 0.00 | 0.00 | 0 | 0.27 | 0.17 | 0.17 | 1 | 0.07 | 0.04 | 0.04 | 1 |
| P53990 | IST1 homolog | IST1 | 6.04 | 1 | 39.7 | 5.35 | 0.00 | 0.00 | 0.00 | 0 | 0.00 | 0.00 | 0.00 | 0 | 0.34 | 0.17 | 0.17 | 1 | 0.00 | 0.00 | 0.00 | 0 | 0.09 | 0.04 | 0.04 | 1 |
| O60506 | Heterogeneous nuclear ribonucleoprotein Q | SYNCRIP | 2.09 | 1 | 69.6 | 8.59 | 0.00 | 0.00 | 0.00 | 0 | 0.00 | 0.00 | 0.00 | 0 | 0.00 | 0.00 | 0.00 | 0 | 0.31 | 0.17 | 0.17 | 1 | 0.08 | 0.04 | 0.04 | 1 |
| P30153 | Serine/threonine-protein phosphatase 2A 65 kDa regulatory subunit A alpha isoform | PPP2R1A | 2.72 | 1 | 65.3 | 5.11 | 0.28 | 0.17 | 0.17 | 1 | 0.00 | 0.00 | 0.00 | 0 | 0.00 | 0.00 | 0.00 | 0 | 0.00 | 0.00 | 0.00 | 0 | 0.07 | 0.04 | 0.04 | 1 |
| Q13085 | Acetyl-CoA carboxylase 1 | ACACA | 0.81 | 1 | 265.4 | 6.37 | 0.00 | 0.00 | 0.00 | 0 | 0.00 | 0.00 | 0.00 | 0 | 0.00 | 0.00 | 0.00 | 0 | 0.28 | 0.17 | 0.17 | 1 | 0.07 | 0.04 | 0.04 | 1 |
| Q6PID6 | Tetratricopeptide repeat protein 33 | TTC33 | 6.11 | 1 | 29.4 | 5.44 | 0.00 | 0.00 | 0.00 | 0 | 0.00 | 0.00 | 0.00 | 0 | 0.29 | 0.17 | 0.17 | 1 | 0.00 | 0.00 | 0.00 | 0 | 0.07 | 0.04 | 0.04 | 1 |
| Q8TE76 | MORC family CW-type zinc finger protein 4 | MORC4 | 1.71 | 1 | 106.3 | 7.46 | 0.00 | 0.00 | 0.00 | 0 | 0.00 | 0.00 | 0.00 | 0 | 0.28 | 0.17 | 0.17 | 1 | 0.00 | 0.00 | 0.00 | 0 | 0.07 | 0.04 | 0.04 | 1 |
| P24390 | ER lumen protein-retaining receptor 1 | KDELR1 | 8.96 | 1 | 24.5 | 8.62 | 0.00 | 0.00 | 0.00 | 0 | 0.00 | 0.00 | 0.00 | 0 | 0.00 | 0.00 | 0.00 | 0 | 0.00 | 0.17 | 0.17 | 1 | 0.00 | 0.04 | 0.04 | 1 |
| Q9NYC9 | Dynein heavy chain 9, axonemal | DNAH9 | 0.51 | 1 | 511.6 | 5.91 | 0.00 | 0.00 | 0.00 | 0 | 0.00 | 0.17 | 0.17 | 1 | 0.00 | 0.00 | 0.00 | 0 | 0.00 | 0.00 | 0.00 | 0 | 0.00 | 0.04 | 0.04 | 1 |
| D6R9M2 | A disintegrin and metalloproteinase with thrombospondin motifs 19 | ADAMTS19 | 78.38 | 1 | 4.2 | 7.78 | 0.00 | 0.17 | 0.17 | 1 | 0.00 | 0.00 | 0.00 | 0 | 0.00 | 0.00 | 0.00 | 0 | 0.00 | 0.00 | 0.00 | 0 | 0.00 | 0.04 | 0.04 | 1 |
| P34096 | Ribonuclease 4 | RNASE4 | 8.84 | 1 | 16.8 | 9.03 | 0.00 | 0.00 | 0.00 | 0 | 0.00 | 0.00 | 0.00 | 0 | 0.28 | 0.17 | 0.17 | 1 | 0.00 | 0.00 | 0.00 | 0 | 0.07 | 0.04 | 0.04 | 1 |
| F2Z3N3 | Olfactomedin-like protein 2B | OLFML2B | 2.80 | 1 | 84.1 | 5.20 | 0.00 | 0.17 | 0.17 | 1 | 0.00 | 0.00 | 0.00 | 0 | 0.00 | 0.00 | 0.00 | 0 | 0.00 | 0.00 | 0.00 | 0 | 0.00 | 0.04 | 0.04 | 1 |
| Q7Z4H7 | HAUS augmin-like complex subunit 6 | HAUS6 | 3.14 | 1 | 108.6 | 6.47 | 0.00 | 0.00 | 0.00 | 0 | 0.34 | 0.17 | 0.17 | 1 | 0.00 | 0.00 | 0.00 | 0 | 0.00 | 0.00 | 0.00 | 0 | 0.09 | 0.04 | 0.04 | 1 |
| P51530 | DNA replication ATP-dependent helicase/nuclease DNA2 | DNA2 | 1.42 | 1 | 120.3 | 7.74 | 0.00 | 0.17 | 0.17 | 1 | 0.00 | 0.00 | 0.00 | 0 | 0.00 | 0.00 | 0.00 | 0 | 0.00 | 0.00 | 0.00 | 0 | 0.00 | 0.04 | 0.04 | 1 |
| A0A024R4M0 | 40S ribosomal protein S9 | RPS9 | 3.61 | 1 | 22.6 | 10.65 | 0.00 | 0.00 | 0.00 | 0 | 0.00 | 0.00 | 0.00 | 0 | 0.00 | 0.00 | 0.00 | 0 | 0.27 | 0.17 | 0.17 | 1 | 0.07 | 0.04 | 0.04 | 1 |
| I3L4R4 | Hepatic leukemia factor (Fragment) | HLF | 6.78 | 1 | 26.5 | 8.37 | 0.00 | 0.00 | 0.00 | 0 | 0.00 | 0.00 | 0.00 | 0 | 0.00 | 0.00 | 0.00 | 0 | 0.00 | 0.17 | 0.17 | 1 | 0.00 | 0.04 | 0.04 | 1 |
| A1L0T0 | Acetolactate synthase-like protein | ILVBL | 3.64 | 1 | 67.8 | 8.15 | 0.00 | 0.00 | 0.00 | 0 | 0.00 | 0.00 | 0.00 | 0 | 0.00 | 0.17 | 0.17 | 1 | 0.00 | 0.00 | 0.00 | 0 | 0.00 | 0.04 | 0.04 | 1 |
| Q9NUQ8 | ATP-binding cassette sub-family F member 3 | ABCF3 | 3.24 | 1 | 79.7 | 6.34 | 0.00 | 0.17 | 0.17 | 1 | 0.00 | 0.00 | 0.00 | 0 | 0.00 | 0.00 | 0.00 | 0 | 0.00 | 0.00 | 0.00 | 0 | 0.00 | 0.04 | 0.04 | 1 |
| Q6PJP8 | DNA cross-link repair 1A protein | DCLRE1A | 1.63 | 1 | 116.3 | 7.97 | 0.00 | 0.00 | 0.00 | 0 | 0.00 | 0.00 | 0.00 | 0 | 0.00 | 0.00 | 0.00 | 0 | 0.00 | 0.17 | 0.17 | 1 | 0.00 | 0.04 | 0.04 | 1 |
| Q8NE86 | Calcium uniporter protein, mitochondrial | MCU | 4.84 | 1 | 39.8 | 8.65 | 0.00 | 0.00 | 0.00 | 0 | 0.00 | 0.00 | 0.00 | 0 | 0.00 | 0.00 | 0.00 | 0 | 0.27 | 0.17 | 0.17 | 1 | 0.07 | 0.04 | 0.04 | 1 |
| Q9Y2Q3 | Glutathione S-transferase kappa 1 | GSTK1 | 11.06 | 1 | 25.5 | 8.41 | 0.00 | 0.00 | 0.00 | 0 | 0.00 | 0.00 | 0.00 | 0 | 0.00 | 0.00 | 0.00 | 0 | 0.00 | 0.17 | 0.17 | 1 | 0.00 | 0.04 | 0.04 | 1 |
| P49238 | CX3C chemokine receptor 1 | CX3CR1 | 7.32 | 1 | 40.4 | 7.17 | 0.00 | 0.00 | 0.00 | 0 | 0.00 | 0.17 | 0.17 | 1 | 0.00 | 0.00 | 0.00 | 0 | 0.00 | 0.00 | 0.00 | 0 | 0.00 | 0.04 | 0.04 | 1 |
| C9JME2 | FERM, ARHGEF and pleckstrin domain-containing protein 1 | FARP1 | 3.53 | 1 | 122.0 | 8.48 | 0.00 | 0.00 | 0.00 | 0 | 0.00 | 0.17 | 0.17 | 1 | 0.00 | 0.00 | 0.00 | 0 | 0.00 | 0.00 | 0.00 | 0 | 0.00 | 0.04 | 0.04 | 1 |
| Q9UNU6 | 7-alpha-hydroxycholest-4-en-3-one 12-alpha-hydroxylase | CYP8B1 | 5.19 | 1 | 58.0 | 8.66 | 0.00 | 0.00 | 0.00 | 0 | 0.35 | 0.17 | 0.17 | 1 | 0.00 | 0.00 | 0.00 | 0 | 0.00 | 0.00 | 0.00 | 0 | 0.09 | 0.04 | 0.04 | 1 |
| P07358 | Complement component C8 beta chain | C8B | 4.57 | 1 | 67.0 | 8.13 | 0.00 | 0.00 | 0.00 | 0 | 0.00 | 0.17 | 0.17 | 1 | 0.00 | 0.00 | 0.00 | 0 | 0.00 | 0.00 | 0.00 | 0 | 0.00 | 0.04 | 0.04 | 1 |
| P25788 | Proteasome subunit alpha type-3 | PSMA3 | 5.49 | 1 | 28.4 | 5.33 | 0.00 | 0.00 | 0.00 | 0 | 0.00 | 0.00 | 0.00 | 0 | 0.00 | 0.00 | 0.00 | 0 | 0.00 | 0.17 | 0.17 | 1 | 0.00 | 0.04 | 0.04 | 1 |
| Q27J81 | Inverted formin-2 | INF2 | 1.20 | 1 | 135.5 | 5.38 | 0.00 | 0.00 | 0.00 | 0 | 0.00 | 0.00 | 0.00 | 0 | 0.28 | 0.17 | 0.17 | 1 | 0.00 | 0.00 | 0.00 | 0 | 0.07 | 0.04 | 0.04 | 1 |
| J3KNQ4 | Alpha-parvin | PARVA | 3.40 | 1 | 46.6 | 8.40 | 0.00 | 0.00 | 0.00 | 0 | 0.27 | 0.17 | 0.17 | 1 | 0.00 | 0.00 | 0.00 | 0 | 0.00 | 0.00 | 0.00 | 0 | 0.07 | 0.04 | 0.04 | 1 |
| P45877 | Peptidyl-prolyl cis-trans isomerase C | PPIC | 6.13 | 1 | 22.7 | 8.40 | 0.00 | 0.00 | 0.00 | 0 | 0.00 | 0.00 | 0.00 | 0 | 0.00 | 0.17 | 0.17 | 1 | 0.00 | 0.00 | 0.00 | 0 | 0.00 | 0.04 | 0.04 | 1 |
| Q9C0B9 | Zinc finger CCHC domain-containing protein 2 | ZCCHC2 | 1.44 | 1 | 125.9 | 7.01 | 0.00 | 0.00 | 0.00 | 0 | 0.00 | 0.00 | 0.00 | 0 | 0.00 | 0.17 | 0.17 | 1 | 0.00 | 0.00 | 0.00 | 0 | 0.00 | 0.04 | 0.04 | 1 |

**Table S4.** Complete list of differentially expressed proteins resulted from the MAProMa comparison of Caelyx, Dox-SiNPs and Dox-SiNPs-TZ 1:8 tumor tissues versus Control condition. For each protein are reported: Uniprot Accession, Reference, Gene name, Molecular Function, Coverage, Peptides, Unique Peptides, MW, pI, Peptide Spectrum Match (PSM), Frequency, DAve and DCI. Frequency indicates how many times a given protein has been identified under each examined condition. The asterisk next to PSM indicates that the average values are given for each protein of the same condition. Three comparisons are considered; Control vs Caelyx, Control vs Dox-SiNPs and Control vs Dox-SiNPs-TZ. Negative values for DAve and DCI indicate that the protein is more abundant in the first term of comparison (in this case the Control), while positive values for these two indexes indicate that the protein is more abundant in the second term of comparison (in this case the nanoparticle formulation considered). For further details regarding the meaning and the confidence range applied to DAve and DCI see Materials & Methods section. It should be noted that proteins were primarily grouped accordingly to their Molecular function.

| Uniprot Accession | Reference | Gene Name | Molecular Function | Coverage | Pep | Unique Pep | MW (kDa) | pI | Control | | Caelyx | | Dox-SiNPs | | Dox-SiNPs-TZ | | Ctrl vs Caelyx | | Ctrl vs Dox-SiNPs | | Ctrl vs Dox-SiNPs-TZ | |
| --- | --- | --- | --- | --- | --- | --- | --- | --- | --- | --- | --- | --- | --- | --- | --- | --- | --- | --- | --- | --- | --- | --- |
| PSM* | Freq | PSM* | Freq | PSM* | Freq | PSM* | Freq | DAVE | DCI | DAVE | DCI | DAVE | DCI |
| E9PF18 | Hydroxyacyl-coenzyme A dehydrogenase, mitochondrial | HADH | 3-hydroxyacyl-CoA dehydrogenase activity | 22.82 | 3 | 3 | 42.1 | 9.26 | 2.167 | 5 | 2.333 | 4 | 3.167 | 6 | 4.333 | 6 | 0.07 | 0 | 0.38 | 3 | 0.67 | 7 |
| P09110 | 3-ketoacyl-CoA thiolase, peroxisomal | ACAA1 | acetate CoA-transferase activity | 9.43 | 3 | 3 | 44.3 | 8.44 | 1.833 | 4 | 3.500 | 4 | 2.333 | 6 | 2.667 | 6 | 0.63 | 4 | 0.24 | 1 | 0.37 | 2 |
| Q01518 | Adenylyl cyclase-associated protein 1 | CAP1 | actin binding | 11.79 | 3 | 3 | 51.9 | 8.06 | 4.333 | 6 | 5.667 | 4 | 7.833 | 6 | 5.000 | 6 | 0.27 | 7 | 0.58 | 21 | 0.14 | 3 |
| E9PK25 | Cofilin-1 | CFL1 | actin binding | 34.31 | 6 | 3 | 22.7 | 8.34 | 4.500 | 6 | 5.833 | 6 | 6.500 | 6 | 5.167 | 6 | 0.26 | 7 | 0.36 | 11 | 0.14 | 3 |
| P21333 | Filamin-A | FLNA | actin binding | 12.32 | 16 | 15 | 280.6 | 6.06 | 1.833 | 5 | 1.833 | 4 | 3.667 | 6 | 2.667 | 6 | 0.00 | 0 | 0.67 | 5 | 0.37 | 2 |
| O75369 | Filamin-B | FLNB | actin binding | 4.34 | 6 | 5 | 278 | 5.73 | 0.833 | 4 | 2.833 | 4 | 3.167 | 6 | 2.500 | 6 | 1.09 | 4 | 1.17 | 5 | 1.00 | 3 |
| P13796 | Plastin-2 | LCP1 | actin binding | 16.91 | 7 | 6 | 70.2 | 5.43 | 3.167 | 6 | 4.500 | 4 | 4.667 | 6 | 4.667 | 6 | 0.35 | 5 | 0.38 | 6 | 0.38 | 6 |
| P26038 | Moesin | MSN | actin binding | 6.93 | 3 | 2 | 67.8 | 6.40 | 1.833 | 6 | 2.500 | 4 | 3.333 | 6 | 1.667 | 5 | 0.31 | 1 | 0.58 | 4 | -0.10 | 0 |
| P07237 | Protein disulfide-isomerase | P4HB | actin binding | 21.85 | 9 | 9 | 57.1 | 4.87 | 7.500 | 6 | 8.833 | 4 | 11.000 | 6 | 11.333 | 6 | 0.16 | 11 | 0.38 | 32 | 0.41 | 36 |
| P07737 | Profilin-1 | PFN1 | actin binding | 50.00 | 5 | 5 | 15 | 8.27 | 2.667 | 5 | 3.000 | 6 | 4.000 | 6 | 3.167 | 6 | 0.12 | 1 | 0.40 | 4 | 0.17 | 1 |
| Q6ZN40 | Tropomyosin 1 (Alpha), isoform CRA_f | TPM1 | actin binding | 27.91 | 10 | 1 | 37.4 | 4.72 | 3.833 | 4 | 2.167 | 3 | 2.833 | 6 | 3.167 | 5 | -0.56 | -5 | -0.30 | -3 | -0.19 | -2 |
| A0A0S2Z4G6 | Tropomyosin 1 (Alpha), isoform CRA_o (Fragment) | TPM1 | actin binding | 29.58 | 10 | 1 | 32.7 | 4.74 | 3.667 | 4 | 2.167 | 3 | 2.500 | 4 | 2.833 | 5 | -0.51 | -4 | -0.38 | -4 | -0.26 | -3 |
| Q5TCU3 | Tropomyosin beta chain | TPM2 | actin binding | 28.17 | 8 | 2 | 32.8 | 4.68 | 3.833 | 5 | 3.333 | 5 | 3.000 | 5 | 2.167 | 6 | -0.14 | -2 | -0.24 | -3 | -0.56 | -5 |
| P35609 | Alpha-actinin-2 | ACTN2 | actin filament binding | 22.71 | 14 | 9 | 103.8 | 5.45 | 4.000 | 5 | 5.333 | 5 | 2.000 | 5 | 3.000 | 5 | 0.29 | 6 | -0.67 | -6 | -0.29 | -4 |
| A0A087WSZ2 | Alpha-actinin-3 | ACTN3 | actin filament binding | 19.28 | 13 | 9 | 107.6 | 6.39 | 5.500 | 4 | 5.167 | 5 | 1.500 | 3 | 3.000 | 5 | -0.06 | -2 | -1.14 | -14 | -0.59 | -11 |
| P12882 | Myosin-1 | MYH1 | actin filament binding | 32.18 | 51 | 7 | 223 | 5.74 | 52.167 | 4 | 37.500 | 3 | 17.500 | 3 | 20.833 | 4 | -0.33 | -658 | -1.00 | -1208 | -0.86 | -1144 |
| Q9UKX3 | Myosin-13 | MYH13 | actin filament binding | 9.80 | 16 | 1 | 223.5 | 5.68 | 10.000 | 4 | 7.333 | 2 | 3.000 | 2 | 2.500 | 4 | -0.31 | -23 | -1.08 | -46 | -1.20 | -47 |
| Q9UKX2 | Myosin-2 | MYH2 | actin filament binding | 26.69 | 44 | 1 | 222.9 | 5.82 | 39.167 | 4 | 25.000 | 2 | 12.000 | 2 | 15.500 | 4 | -0.44 | -455 | -1.06 | -695 | -0.87 | -647 |
| P11055 | Myosin-3 | MYH3 | actin filament binding | 12.16 | 20 | 1 | 223.8 | 5.81 | 16.667 | 4 | 10.167 | 3 | 4.667 | 2 | 5.000 | 4 | -0.48 | -87 | -1.13 | -128 | -1.08 | -126 |
| Q9Y623 | Myosin-4 | MYH4 | actin filament binding | 28.11 | 51 | 12 | 222.9 | 5.85 | 50.167 | 4 | 41.833 | 4 | 19.333 | 3 | 21.333 | 4 | -0.18 | -383 | -0.89 | -1071 | -0.81 | -1031 |
| P13533 | Myosin-6 | MYH6 | actin filament binding | 10.31 | 16 | 6 | 223.6 | 5.73 | 10.833 | 4 | 8.833 | 2 | 4.000 | 2 | 3.833 | 4 | -0.20 | -20 | -0.92 | -51 | -0.95 | -51 |
| P13535 | Myosin-8 | MYH8 | actin filament binding | 19.10 | 32 | 2 | 222.6 | 5.74 | 35.000 | 4 | 27.333 | 3 | 12.667 | 3 | 13.667 | 4 | -0.25 | -239 | -0.94 | -532 | -0.88 | -519 |
| P35579 | Myosin-9 | MYH9 | actin filament binding | 21.22 | 26 | 23 | 226.4 | 5.60 | 13.667 | 6 | 15.333 | 6 | 18.667 | 6 | 19.500 | 6 | 0.11 | 24 | 0.31 | 81 | 0.35 | 97 |
| Q9Y490 | Talin-1 | TLN1 | actin filament binding | 5.55 | 6 | 6 | 269.6 | 6.07 | 6.167 | 6 | 6.333 | 5 | 9.000 | 6 | 7.000 | 6 | 0.03 | 1 | 0.37 | 21 | 0.13 | 5 |
| P02585 | Troponin C, skeletal muscle | TNNC2 | actin filament binding | 10.63 | 1 | 1 | 18.1 | 4.20 | 1.833 | 2 | 3.833 | 2 | 0.833 | 2 | 1.333 | 4 | 0.71 | 6 | -0.75 | -1 | -0.32 | -1 |
| P06748 | Nucleophosmin | NPM1 | activating transcription factor binding | 25.85 | 5 | 5 | 32.6 | 4.78 | 3.667 | 6 | 4.167 | 6 | 6.000 | 6 | 4.500 | 6 | 0.13 | 2 | 0.48 | 11 | 0.20 | 3 |
| P25705 | ATP synthase subunit alpha, mitochondrial | ATP5F1A | ADP binding | 32.73 | 12 | 12 | 59.7 | 9.13 | 7.500 | 6 | 6.833 | 6 | 4.333 | 5 | 7.333 | 6 | -0.09 | -5 | -0.54 | -19 | -0.02 | -1 |
| P55072 | Transitional endoplasmic reticulum ATPase | VCP | ADP binding | 17.74 | 9 | 9 | 89.3 | 5.26 | 3.500 | 5 | 2.167 | 5 | 2.333 | 6 | 4.667 | 6 | -0.47 | -4 | -0.40 | -3 | 0.29 | 5 |
| P06702 | Protein S100-A9 | S100A9 | antioxidant activity | 80.70 | 9 | 9 | 13.2 | 6.13 | 15.333 | 6 | 19.833 | 6 | 26.500 | 6 | 21.833 | 6 | 0.26 | 79 | 0.53 | 234 | 0.35 | 121 |
| P10809 | 60 kDa heat shock protein, mitochondrial | HSPD1 | apolipoprotein A-I binding | 20.42 | 8 | 8 | 61 | 5.87 | 9.167 | 6 | 11.500 | 4 | 14.167 | 6 | 15.167 | 6 | 0.23 | 24 | 0.43 | 58 | 0.49 | 73 |
| Q562R1 | Beta-actin-like protein 2 | ACTBL2 | ATP binding | 22.87 | 4 | 2 | 42 | 5.59 | 8.000 | 6 | 7.667 | 6 | 5.500 | 6 | 6.167 | 6 | -0.04 | -3 | -0.37 | -17 | -0.26 | -13 |
| O14983 | Sarcoplasmic/endoplasmic reticulum calcium ATPase 1 | ATP2A1 | ATP binding | 17.28 | 10 | 10 | 110.2 | 5.16 | 8.167 | 4 | 6.333 | 4 | 3.333 | 3 | 6.333 | 5 | -0.25 | -13 | -0.84 | -28 | -0.25 | -13 |
| P40227 | T-complex protein 1 subunit zeta | CCT6A | ATP binding | 11.30 | 4 | 4 | 58 | 6.68 | 3.333 | 5 | 3.500 | 4 | 6.000 | 6 | 3.667 | 6 | 0.05 | 1 | 0.57 | 12 | 0.10 | 1 |
| P06732 | Creatine kinase M-type | CKM | ATP binding | 32.28 | 8 | 8 | 43.1 | 7.25 | 14.167 | 4 | 13.333 | 4 | 7.667 | 6 | 10.000 | 4 | -0.06 | -11 | -0.60 | -71 | -0.34 | -50 |
| P12532 | Creatine kinase U-type, mitochondrial | CKMT1A | ATP binding | 6.24 | 1 | 1 | 47 | 8.34 | 0.333 | 2 | 1.500 | 4 | 1.167 | 3 | 2.667 | 6 | 1.27 | 1 | 1.11 | 1 | 1.56 | 4 |
| P60842 | Eukaryotic initiation factor 4A-I | EIF4A1 | ATP binding | 19.70 | 5 | 5 | 46.1 | 5.48 | 2.167 | 6 | 3.500 | 5 | 2.333 | 6 | 1.667 | 5 | 0.47 | 4 | 0.07 | 0 | -0.26 | -1 |
| P38646 | Stress-70 protein, mitochondrial | HSPA9 | ATP binding | 11.49 | 6 | 5 | 73.6 | 6.16 | 1.667 | 4 | 4.833 | 5 | 2.833 | 6 | 3.500 | 5 | 0.97 | 10 | 0.52 | 3 | 0.71 | 5 |
| Q32Q12 | Nucleoside diphosphate kinase | NME1-NME2 | ATP binding | 31.51 | 4 | 4 | 32.6 | 8.48 | 6.333 | 6 | 9.500 | 6 | 10.667 | 6 | 9.833 | 6 | 0.40 | 25 | 0.51 | 37 | 0.43 | 28 |
| P00558 | Phosphoglycerate kinase 1 | PGK1 | ATP binding | 47.00 | 12 | 12 | 44.6 | 8.10 | 5.833 | 6 | 12.667 | 6 | 12.833 | 6 | 10.333 | 6 | 0.74 | 63 | 0.75 | 65 | 0.56 | 36 |
| A0A0A0MTS7 | Titin | TTN | ATP binding | 0.74 | 16 | 16 | 3992 | 6.39 | 3.333 | 4 | 1.500 | 3 | 0.167 | 1 | 0.167 | 1 | -0.76 | -4 | -1.81 | -6 | -1.81 | -6 |
| P12956 | X-ray repair cross-complementing protein 6 | XRCC6 | ATP binding | 9.69 | 3 | 3 | 69.8 | 6.64 | 0.833 | 2 | 2.667 | 4 | 2.833 | 6 | 1.667 | 4 | 1.05 | 3 | 1.09 | 4 | 0.67 | 1 |
| P07900 | Heat shock protein HSP 90-alpha | HSP90AA1 | ATPase activity | 14.89 | 7 | 3 | 84.6 | 5.02 | 2.667 | 6 | 3.667 | 5 | 4.333 | 6 | 3.000 | 6 | 0.32 | 3 | 0.48 | 6 | 0.12 | 1 |
| P11142 | Heat shock coate 71 kDa protein | HSPA8 | ATPase activity | 25.23 | 12 | 11 | 70.9 | 5.52 | 7.833 | 6 | 11.333 | 6 | 10.500 | 6 | 8.500 | 6 | 0.37 | 34 | 0.29 | 24 | 0.08 | 5 |
| P07355 | Annexin A2 | ANXA2 | cadherin binding | 28.02 | 8 | 8 | 38.6 | 7.75 | 3.167 | 6 | 1.833 | 6 | 3.333 | 6 | 1.667 | 4 | -0.53 | -3 | 0.05 | 1 | -0.62 | -4 |
| P61978 | Heterogeneous nuclear ribonucleoprotein K | HNRNPK | cadherin binding | 18.36 | 5 | 5 | 50.9 | 5.54 | 2.333 | 6 | 3.833 | 6 | 4.333 | 6 | 4.167 | 5 | 0.49 | 5 | 0.60 | 7 | 0.56 | 6 |
| P05783 | Keratin, type I cytoskeletal 18 | KRT18 | cadherin binding | 46.28 | 14 | 13 | 48 | 5.45 | 10.667 | 6 | 15.667 | 4 | 21.333 | 6 | 20.667 | 6 | 0.38 | 66 | 0.67 | 171 | 0.64 | 157 |
| P37802 | Transgelin-2 | TAGLN2 | cadherin binding | 22.11 | 3 | 3 | 22.4 | 8.25 | 5.833 | 6 | 8.500 | 6 | 8.333 | 6 | 7.000 | 6 | 0.37 | 19 | 0.35 | 18 | 0.18 | 7 |
| P08758 | Annexin A5 | ANXA5 | calcium ion binding | 24.69 | 7 | 7 | 35.9 | 5.05 | 3.500 | 6 | 4.833 | 6 | 4.333 | 6 | 6.333 | 6 | 0.32 | 6 | 0.21 | 3 | 0.58 | 14 |
| E7EMB3 | Calmodulin-2 | CALM2 | calcium ion binding | 33.67 | 4 | 4 | 21.7 | 4.56 | 3.500 | 6 | 7.667 | 6 | 8.500 | 6 | 6.833 | 6 | 0.75 | 23 | 0.83 | 30 | 0.65 | 17 |
| P05976 | Myosin light chain 1/3, skeletal muscle isoform | MYL1 | calcium ion binding | 30.93 | 7 | 6 | 21.1 | 5.03 | 5.000 | 5 | 8.167 | 2 | 2.333 | 2 | 4.833 | 4 | 0.48 | 21 | -0.73 | -10 | -0.03 | -1 |
| H3BPK4 | Myosin regulatory light chain 2, skeletal muscle isoform | MYLPF | calcium ion binding | 36.68 | 6 | 6 | 22 | 5.81 | 8.667 | 4 | 9.000 | 2 | 5.833 | 2 | 10.833 | 4 | 0.04 | 3 | -0.39 | -21 | 0.22 | 21 |
| P31151 | Protein S100-A7 | S100A7 | calcium ion binding | 45.54 | 5 | 4 | 11.5 | 6.77 | 8.000 | 4 | 11.000 | 6 | 19.667 | 6 | 12.333 | 6 | 0.32 | 29 | 0.84 | 161 | 0.43 | 44 |
| P45378 | Troponin T, fast skeletal muscle | TNNT3 | calcium ion binding | 16.73 | 3 | 3 | 31.8 | 5.90 | 2.833 | 4 | 2.333 | 2 | 1.000 | 2 | 2.167 | 3 | -0.19 | -1 | -0.96 | -4 | -0.27 | -2 |
| P04264 | Keratin, type II cytoskeletal 1 | KRT1 | carbohydrate binding | 12.42 | 7 | 7 | 66 | 8.12 | 0.333 | 2 | 0.667 | 2 | 3.333 | 4 | 0.333 | 2 | 0.67 | 0 | 1.64 | 6 | 0.00 | 0 |
| Q15582 | Transforming growth factor-beta-induced protein ig-h3 | TGFBI | cell adhesion molecule binding | 3.37 | 1 | 1 | 74.6 | 7.71 | 1.333 | 4 | 1.167 | 4 | 3.833 | 6 | 1.667 | 4 | -0.13 | 0 | 0.97 | 6 | 0.22 | 1 |
| P02751 | Fibronectin | FN1 | chaperone binding | 21.92 | 28 | 28 | 262.5 | 5.71 | 21.667 | 6 | 16.667 | 6 | 30.667 | 6 | 24.833 | 6 | -0.26 | -96 | 0.34 | 236 | 0.14 | 74 |
| P29401 | Transketolase | TKT | cofactor binding | 14.77 | 5 | 5 | 67.8 | 7.66 | 2.667 | 5 | 5.333 | 4 | 7.333 | 6 | 5.000 | 6 | 0.67 | 11 | 0.93 | 23 | 0.61 | 9 |
| P31944 | Caspase-14 | CASP14 | cysteine-type endopeptidase activity | 33.06 | 5 | 5 | 27.7 | 5.58 | 0.667 | 2 | 1.667 | 4 | 2.833 | 6 | 1.500 | 3 | 0.86 | 1 | 1.24 | 4 | 0.77 | 1 |
| O95994 | Anterior gradient protein 2 homolog | AGR2 | EGF receptor binding | 29.71 | 3 | 3 | 20 | 9.00 | 1.667 | 3 | 2.333 | 5 | 2.167 | 6 | 4.167 | 6 | 0.33 | 1 | 0.26 | 1 | 0.86 | 7 |
| P13804 | Electron transfer flavoprotein subunit alpha, mitochondrial | ETFA | electron transfer activity | 15.02 | 3 | 3 | 35.1 | 8.38 | 3.500 | 6 | 2.167 | 4 | 4.000 | 6 | 5.000 | 6 | -0.47 | -4 | 0.13 | 2 | 0.35 | 6 |
| Q99715 | Collagen alpha-1(XII) chain | COL12A1 | extracellular matrix structural constituent | 11.66 | 23 | 23 | 332.9 | 5.53 | 14.000 | 6 | 9.667 | 6 | 15.833 | 6 | 13.833 | 6 | -0.37 | -51 | 0.12 | 27 | -0.01 | -2 |
| P12111 | Collagen alpha-3(VI) chain | COL6A3 | extracellular matrix structural constituent | 2.36 | 5 | 5 | 343.5 | 6.68 | 6.833 | 6 | 5.333 | 6 | 10.500 | 6 | 7.167 | 6 | -0.25 | -9 | 0.42 | 32 | 0.05 | 2 |
| P25391 | Laminin subunit alpha-1 | LAMA1 | extracellular matrix structural constituent | 3.22 | 8 | 8 | 336.9 | 6.35 | 7.167 | 5 | 7.833 | 6 | 8.667 | 6 | 4.167 | 6 | 0.09 | 5 | 0.19 | 12 | -0.53 | -17 |
| P51888 | Prolargin | PRELP | extracellular matrix structural constituent | 9.95 | 3 | 3 | 43.8 | 9.38 | 4.000 | 6 | 3.000 | 4 | 4.500 | 6 | 2.500 | 6 | -0.29 | -4 | 0.12 | 2 | -0.46 | -5 |
| A0A2U3TZU2 | Glucose-6-phosphate isomerase | GPI | glucose-6-phosphate isomerase activity | 17.76 | 6 | 6 | 67.2 | 8.97 | 1.333 | 3 | 2.333 | 3 | 4.500 | 6 | 2.500 | 5 | 0.55 | 2 | 1.09 | 9 | 0.61 | 2 |
| P11217 | Glycogen phosphorylase, muscle form | PYGM | glycogen phosphorylase activity | 18.17 | 11 | 9 | 97 | 7.03 | 3.333 | 4 | 2.333 | 2 | 1.667 | 2 | 2.667 | 3 | -0.35 | -3 | -0.67 | -4 | -0.22 | -2 |
| P19971 | Thymidine phosphorylase | TYMP | growth factor activity | 18.26 | 4 | 4 | 49.9 | 5.53 | 1.167 | 3 | 2.500 | 4 | 4.500 | 6 | 3.333 | 6 | 0.73 | 2 | 1.18 | 9 | 0.96 | 5 |
| P68104 | Elongation factor 1-alpha 1 | EEF1A1 | GTPase activity | 24.68 | 7 | 3 | 50.1 | 9.01 | 5.833 | 6 | 7.000 | 6 | 9.167 | 6 | 8.167 | 6 | 0.18 | 7 | 0.44 | 25 | 0.33 | 16 |
| P50395 | Rab GDP dissociation inhibitor beta | GDI2 | GTPase activity | 24.72 | 7 | 7 | 50.6 | 6.47 | 7.333 | 6 | 8.167 | 6 | 10.500 | 6 | 9.333 | 6 | 0.11 | 6 | 0.36 | 28 | 0.24 | 17 |
| F5H5D3 | Tubulin alpha chain | TUBA1C | GTPase activity | 32.95 | 13 | 2 | 57.7 | 5.07 | 10.500 | 6 | 15.000 | 6 | 14.667 | 6 | 14.333 | 6 | 0.35 | 57 | 0.33 | 52 | 0.31 | 48 |
| P07437 | Tubulin beta chain | TUBB | GTPase activity | 58.56 | 14 | 3 | 49.6 | 4.89 | 13.167 | 6 | 16.500 | 6 | 21.500 | 6 | 19.500 | 6 | 0.22 | 49 | 0.48 | 144 | 0.39 | 103 |
| P68371 | Tubulin beta-4B chain | TUBB4B | GTPase activity | 48.99 | 12 | 1 | 49.8 | 4.89 | 10.500 | 6 | 12.167 | 6 | 15.000 | 6 | 15.167 | 6 | 0.15 | 19 | 0.35 | 57 | 0.36 | 60 |
| Q3ZCM7 | Tubulin beta-8 chain | TUBB8 | GTPase activity | 19.82 | 5 | 1 | 49.7 | 4.89 | 2.667 | 5 | 3.167 | 6 | 4.000 | 6 | 3.000 | 6 | 0.17 | 1 | 0.40 | 4 | 0.12 | 1 |
| P22626 | Heterogeneous nuclear ribonucleoproteins A2/B1 | HNRNPA2B1 | identical protein binding | 17.28 | 5 | 5 | 37.4 | 8.95 | 1.667 | 5 | 3.667 | 6 | 3.000 | 6 | 1.833 | 5 | 0.75 | 5 | 0.57 | 3 | 0.10 | 0 |
| P19338 | Nucleolin | NCL | identical protein binding | 11.55 | 5 | 5 | 76.6 | 4.70 | 1.000 | 3 | 1.667 | 3 | 3.667 | 6 | 1.333 | 5 | 0.50 | 1 | 1.14 | 6 | 0.29 | 0 |
| P04792 | Heat shock protein beta-1 | HSPB1 | identical protein binding | 58.54 | 7 | 7 | 22.8 | 6.40 | 7.833 | 6 | 10.333 | 6 | 14.333 | 6 | 10.833 | 6 | 0.28 | 23 | 0.59 | 72 | 0.32 | 28 |
| P58107 | Epiplakin | EPPK1 | intermediate filament binding | 21.88 | 10 | 8 | 555.3 | 5.62 | 5.667 | 6 | 8.167 | 4 | 7.500 | 6 | 8.833 | 6 | 0.36 | 17 | 0.28 | 12 | 0.44 | 23 |
| A0A2R8Y6G6 | Alpha-enolase | ENO1 | magnesium ion binding | 36.64 | 9 | 8 | 47.3 | 6.99 | 13.333 | 6 | 21.000 | 6 | 21.167 | 6 | 20.333 | 6 | 0.45 | 132 | 0.45 | 135 | 0.42 | 118 |
| P36871 | Phosphoglucomutase-1 | PGM1 | magnesium ion binding | 22.95 | 6 | 6 | 61.4 | 6.76 | 2.833 | 6 | 2.500 | 6 | 3.500 | 6 | 4.333 | 6 | -0.13 | -1 | 0.21 | 2 | 0.42 | 5 |
| O14773 | Tripeptidyl-peptidase 1 | TPP1 | metal ion binding | 7.28 | 2 | 2 | 61.2 | 6.48 | 1.167 | 5 | 2.167 | 3 | 2.167 | 6 | 3.500 | 6 | 0.60 | 2 | 0.60 | 2 | 1.00 | 5 |
| Q04695 | Keratin, type I cytoskeletal 17 | KRT17 | MHC class II protein binding | 12.96 | 4 | 2 | 48.1 | 5.02 | 1.667 | 4 | 2.000 | 4 | 3.167 | 5 | 3.167 | 6 | 0.18 | 1 | 0.62 | 4 | 0.62 | 4 |
| P55060 | Exportin-2 | CSE1L | nuclear export signal receptor activity | 12.77 | 6 | 6 | 110.3 | 5.77 | 5.500 | 5 | 6.000 | 4 | 8.667 | 6 | 7.500 | 6 | 0.09 | 3 | 0.45 | 22 | 0.31 | 13 |
| Q15084 | Protein disulfide-isomerase A6 | PDIA6 | peptide disulfide oxidoreductase activity | 8.86 | 2 | 2 | 48.1 | 5.08 | 0.500 | 2 | 1.833 | 4 | 3.000 | 5 | 2.500 | 6 | 1.14 | 2 | 1.43 | 4 | 1.33 | 3 |
| P08729 | Keratin, type II cytoskeletal 7 | KRT7 | programmed cell death | 27.08 | 10 | 8 | 51.4 | 5.48 | 8.500 | 6 | 11.167 | 6 | 12.167 | 6 | 12.000 | 6 | 0.27 | 26 | 0.35 | 38 | 0.34 | 36 |
| A0A087WVQ6 | Clathrin heavy chain | CLTC | protein kinase binding | 22.04 | 20 | 20 | 191.9 | 5.69 | 6.333 | 6 | 7.833 | 5 | 8.667 | 6 | 9.833 | 6 | 0.21 | 11 | 0.31 | 18 | 0.43 | 28 |
| P08727 | Keratin, type I cytoskeletal 19 | KRT19 | protein-containing complex binding | 63.50 | 22 | 18 | 44.1 | 5.14 | 22.333 | 6 | 31.333 | 6 | 35.667 | 6 | 33.833 | 6 | 0.34 | 242 | 0.46 | 387 | 0.41 | 323 |
| P13646 | Keratin, type I cytoskeletal 13 | KRT13 | structural molecule activity | 7.42 | 3 | 1 | 49.6 | 4.96 | 4.500 | 6 | 7.000 | 6 | 6.333 | 6 | 6.833 | 6 | 0.43 | 14 | 0.34 | 10 | 0.41 | 13 |
| Q06828 | Fibromodulin | FMOD | TGFB receptor complex assembly | 10.90 | 3 | 3 | 43.2 | 6.04 | 3.500 | 6 | 2.667 | 6 | 5.667 | 6 | 4.333 | 5 | -0.27 | -3 | 0.47 | 10 | 0.21 | 3 |

**References**

1. Mahon E, Hristov DR, Dawson KA. Stabilising fluorescent silica nanoparticles against dissolution effects for biological studies. *Chem Commun (Camb).* 2012;48(64):7970-7972.

2. Soto-Cantu E, Cueto R, Koch J, Russo PS. Synthesis and Rapid Characterization of Amine-Functionalized Silica. *Langmuir.* 2012;28(13):5562-5569.

3. Riva B, Bellini M, Corvi E, et al. Impact of the strategy adopted for drug loading in nonporous silica nanoparticles on the drug release and cytotoxic activity. *J Colloid Interface Sci.* 2018;519:18-26.
